# Supplementary material
Source: Research Square preprint supplement (doi:10.21203/rs.3.rs-9990811/v1)
Supplement: Supplementary file 1 [file 1e9bdffaf6b64b7c1ffb3934.docx]

**Supplementary File 1: Complete openFDA Query Syntax Reference**

This document outlines the programmatic query syntax and pagination orchestration used by MAUDEMetrics to extract high-volume data from the openFDA API.

**1. Base Endpoint**

All queries are directed to the openFDA device adverse-event endpoint:

https://api.fda.gov/device/event.json

**2. Query Construction (search parameter)**

MAUDEMetrics constructs the search parameter dynamically based on user input from the graphical interface. The syntax uses Lucene query format connected by AND operators.

**Examples of field mapping:**

Device name: device.generic_name:"<input>" OR device.brand_name:"<input>"

• Product code: device.device_report_product_code:"<input>"

• Manufacturer: device.manufacturer_d_name:"<input>"

• Date range: date_received:[YYYY-MM-DD TO YYYY-MM-DD]

**Example combined query:**

*search=device.brand_name:"impella" AND date_received:[2010-01-01 TO 2026-03-25]*

**3. Cursor-Based Pagination (search_after)**

To bypass the 26,000-record skip/limit ceiling, MAUDEMetrics uses cursor-based pagination exclusively.

(1) Initial request: the first request includes the base search, a limit of 1,000, and a sort parameter (e.g., sort=date_received:desc).

(2) Subsequent requests: MAUDEMetrics intercepts the HTTP Link header returned in each response. The header contains the pre-computed URL for the next chronological batch of 1,000 records using the search_after parameter.

(3) Iteration: the orchestration engine loops this process, appending subsequent batches to the dataset until the Link header is no longer present, indicating the dataset has been fully traversed.

**4. Resilience and Rate Limiting**

To prevent HTTP 429 (Too Many Requests) errors, the framework implements exponential backoff. If a connection fails or is throttled, the tool waits automatically and retries the specific search_after URL without dropping the session.

**5. Snapshot Reproducibility**

Because the openFDA API is updated continuously, query results are sensitive to the snapshot date. MAUDEMetrics records the wall-clock UTC timestamp at the start and end of every extraction in the export metadata sheet (Optimized Excel — Run Manifest tab). Investigators reproducing a published analysis should report the exact query string, the limit/sort parameters, and the snapshot date alongside the openFDA endpoint version. Identical queries executed at different times may differ in retrieved record counts because of subsequent FDA submissions, follow-up reports, and corrections.
