# Supplementary material
Source: Research Square preprint supplement (doi:10.21203/rs.3.rs-9990811/v1)
Supplement: Supplementary file 2 [file 353d144082c8df38fd9ae471.docx]

**Supplementary File 2: Data Standardization Protocol**

This document details the fully automated data standardization and transformation pipeline used by MAUDEMetrics to process raw nested JSON responses from the openFDA API into normalized relational and tabular formats suitable for epidemiological analysis.

**1. Date Normalization**

Date fields in the raw openFDA response are often formatted as unbroken string integers (YYYYMMDD). MAUDEMetrics applies a Pandas conversion to parse these strings into standardized ISO 8601 DateTime objects (YYYY-MM-DD). Malformed, partial, or missing dates are explicitly converted to Pandas NaT (Not a Time) or None to prevent type-conversion errors during downstream aggregation.

**2. Nested Demographics Flattening**

Patient data is returned by the API within deeply nested arrays (e.g., patient → patient_problem / patient_age). The pipeline extracts key demographics directly into top-level columns, standardizes age strings, and normalizes gender representations to consistent categorical variables. Missing demographic fields are uniformly populated with null/NaN to ensure statistical continuity.

**3. Narrative Text Concatenation**

MDR reports frequently contain long clinical narratives that the FDA splits across multiple mdr_text objects due to character limits. MAUDEMetrics detects multi-entry mdr_text arrays for a single report key, programmatically orders and concatenates the text blocks into a single Integrated_Narrative column, and sanitizes Unicode artifacts and stray newline characters to prevent formatting corruption during CSV and Excel export.

**4. Device-Problem Taxonomy**

Categorical mappings for device problems and patient problems are preserved from the FDA terminology but flattened so that each adverse-event row clearly arrays the associated problems without requiring secondary table joins by the end-user.

**5. Deduplication Policy**

MAUDEMetrics performs no automated deduplication of MAUDE submissions. A single real-world adverse event may generate multiple MDR submissions through follow-up reports, mandatory per-component reporting, or manufacturer updates; the optimal deduplication rule is study-specific and frequently depends on fields (such as patient identifiers and event-date precision) that are partially redacted in the public MAUDE release. Counts and percentages produced by MAUDEMetrics summary-statistics exports are therefore raw MDR submission counts, not event-level incidence. Investigators performing epidemiological inference should implement context-appropriate deduplication — for example, collapsing follow-ups onto initial reports or restricting to unique manufacturer report numbers within a defined window — in their downstream analysis pipeline and report the rule explicitly in any publication.
