# Supplementary material
Source: Research Square preprint supplement (doi:10.21203/rs.3.rs-9990811/v1)
Supplement: Supplementary file 2 [file 2139d5bb5abc83fc89889b57.xlsx]

## Sheet: Summary
Summary	Value
Total Reports	38437
Patient Demographics	Value	Frequency	Percentage
Age (years) median (range)	64 (0-32485)
Weight median (range)	84.0 (10.0-224.0)
Sex	Male	22464	63.6%
	Female	9380	26.6%
	Unknown	3463	9.8%
	Prefer Not To Disclose	1	0.0%
Ethnicity	Non Hispanic	23105	89.9%
	Hispanic	2601	10.1%
Race	White	19868	73.1%
	Black Or African American	3647	13.4%
	Asian	3418	12.6%
	Native Hawaiian Or Other Pacific Islander	135	0.5%
	American Indian Or Alaskan Native	117	0.4%
	American Indian Or Alaskan Native, White	1	0.0%
	Asian, White	1	0.0%
Event Type	Frequency	Percentage
Injury	19047	49.6%
Malfunction	14763	38.4%
Death	4620	12.0%
Other	2	0.0%
Report Source Code	Frequency	Percentage
Manufacturer report	38112	99.2%
User Facility report	210	0.5%
Voluntary report	115	0.3%
Source Type	Frequency	Percentage
User facility	36296	30.4%
Company representation	36206	30.4%
Health Professional	36125	30.3%
Foreign	6592	5.5%
COMPANY REPRESENTATIVE	1294	1.1%
Study	713	0.6%
HEALTH	536	0.4%
FOREIG	474	0.4%
CONSUM	251	0.2%
Literature	216	0.2%
Consumer	141	0.1%
Distributor	108	0.1%
DISTRIBUTOR	107	0.1%
FOREIGN	47	0.0%
Other	37	0.0%
HEALTH PROFESSION	27	0.0%
HEALTH PROFESSIONAL	25	0.0%
USER F	14	0.0%
DISTRI	11	0.0%
CONSUMER	9	0.0%
LITERATURE	6	0.0%
OTHER	6	0.0%
HEALTH PR	5	0.0%
LITERA	4	0.0%
USER FACI	4	0.0%
Unknown	3	0.0%
HEALTH PROFE	3	0.0%
USER FACILITY	3	0.0%
U	2	0.0%
L	1	0.0%
STUDY	1	0.0%
Reporter Occupation Code	Frequency	Percentage
PHYSICIAN	34248	93.2%
BIOMEDICAL ENGINEER	1217	3.3%
OTHER HEALTH CARE PROFESSIONAL	870	2.4%
003	179	0.5%
OTHER	103	0.3%
RISK MANAGER	67	0.2%
NURSE	43	0.1%
PHYSICIAN ASSISTANT	11	0.0%
PHARMACIST	8	0.0%
PATIENT FAMILY MEMBER OR FRIEND	6	0.0%
UNKNOWN	5	0.0%
PATIENT	2	0.0%
505	2	0.0%
117	1	0.0%
Product Code	Frequency	Percentage
OZD	36226	94.2%
PYX	1798	4.7%
DYB	158	0.4%
KFM	130	0.3%
PBL	67	0.2%
OJE	24	0.1%
DQX	14	0.0%
OXD	7	0.0%
DWA	6	0.0%
QOC	4	0.0%
PXY	3	0.0%
DSQ	3	0.0%
OVD	1	0.0%
UNK	1	0.0%
-	1	0.0%
OXY	1	0.0%
DXY	1	0.0%
LWS	1	0.0%
DWB	1	0.0%
DSP	1	0.0%
Model Number	Frequency	Percentage
IMPELLA CP	19024	50.9%
IMPELLA 5.5	6878	18.4%
AUTOMATED IMPELLA CONTROLLER	3478	9.3%
IMPELLA RP	995	2.7%
IMPELLA RP FLEX	548	1.5%
IMPELLA 5.0	533	1.4%
IMPELLA CP SMARTASSIST JP	377	1.0%
PUMP 371 14F LT CMR SET	374	1.0%
PUMP 380 14F LT CMR SET (US)	363	1.0%
IMPELLA CP PUMP SET, JAPAN	332	0.9%
IMPELLA 5.5 WITH SMARTASSIST S2 SET, US	329	0.9%
IMPELLA 5.5 WITH SMARTASSIST SET, US	295	0.8%
IMPELLA 2.5	270	0.7%
IMPELLA CONTROLLER, PACKAGED, US	251	0.7%
IMPELLA CP EU	224	0.6%
AUTOMATED IMPELLA CONTROLLER (AIC)	217	0.6%
PUMP 550 S2 PUMP SET	209	0.6%
IMPELLA CP PUMP 371 SET, US	155	0.4%
IMPELLA 2.5 PUMP SET, JAPAN	129	0.3%
IMPELLA CONTROLLER	104	0.3%
IMPELLA CP-JP	94	0.3%
IMPELLA 5.0 PUMP SET, JAPAN	94	0.3%
PUMP 550 S2 PUMP SET ¿ (LMR)	81	0.2%
IMPELLA RP US PUMP SET	74	0.2%
PUMP SET, PUMP 381 (US)	66	0.2%
OPTICAL, AIC, IMPELLA CONNECT, PKGD, US	60	0.2%
TESTED OPTICAL AIC W/IMPELLA CONNECT	60	0.2%
IMPELLA LD	58	0.2%
IMPELLA CP-EU	58	0.2%
IMPELLA CP - JP	55	0.1%
IMPELLA 5.5 EU	51	0.1%
IMPELLA CP PUMP	49	0.1%
IMPELLA CP C7 W V3 GWRU SET, US	45	0.1%
IMPELLA CP PUMP SET EU	45	0.1%
IMPELLA CP - EU	44	0.1%
IMPELLA 5.0 EU	43	0.1%
IMPELLA CP JP	41	0.1%
IMPELLA	40	0.1%
0052-3025	40	0.1%
0048-0003	39	0.1%
IMPELLA 5.0 AIC PUMP SET US	39	0.1%
0052-3021	37	0.1%
IMPELLA CP PUMP 380 SMART ASSIST SET, EU	37	0.1%
UNKNOWN	36	0.1%
IMPELLA LP2.5	34	0.1%
0052-3000	32	0.1%
IMPELLA RP EU	28	0.1%
IMPELLA 5.5 WITH SMART ASSIST SET, EU	27	0.1%
IMPELLA 5.5 SMARTASSIST SET, JP	27	0.1%
0052-3006	27	0.1%
RP FLEX W SMART ASSIST SET, US	26	0.1%
RP W SMART ASSIST SET, US	25	0.1%
IMPELLA OPTICAL CONTROLLER, PACKAGED, US	24	0.1%
IMPELLA CONTROLLER, PACKAGED, JP	23	0.1%
IMPELLA 2.5 EU	21	0.1%
IMPELLA CONTROLLER, PACKAGED, EU	21	0.1%
*	20	0.1%
IMPELLA 2.5 AIC PUMP SET US	19	0.1%
IMPELLA OPTICAL CONTROLLER, PACKAGED, EU	18	0.0%
PUMP 550	17	0.0%
IMPELLA CP EU	16	0.0%
IMPELLA 5.5 PUMP	16	0.0%
IMPELLA LP5.0	16	0.0%
IMPELLA 5.5 JP	15	0.0%
IMPELLA 5.5 - JP	15	0.0%
AUTOMATED IMPELLA CONTROLLER EU	13	0.0%
IMPELLA CP PUMP SET, US	12	0.0%
IMPELLA 5.5 WITH SMARTASSIST S2 SET, EU	11	0.0%
1000100	11	0.0%
IMPELLA 5.5-JP	11	0.0%
IMPELLA 5.5 PUMP SET JP	11	0.0%
IMPELLA CP JP	10	0.0%
IMPELLA LD AIC PUMP SET US	10	0.0%
OPTICAL AIC W/IMPELLA CONNECT	9	0.0%
IMPELLA 5.5 - EU	9	0.0%
IMEPLLA CP	8	0.0%
LP2.5	8	0.0%
IMPELLA CP SMART ASSIST SET APAC	8	0.0%
IMPELLA CPSA C9+ SET, OUS	8	0.0%
IMPELLA 5.5-EU	8	0.0%
PUMP SET, PUMP 380 (US)	8	0.0%
IMPELLA LP 2.5 PUMP	8	0.0%
IMPELLA LP 5.0 PUMP	7	0.0%
IMPELLA 2.5-EU	7	0.0%
RP FLEX	7	0.0%
IMPELLA OPTICAL CONTROLLER	7	0.0%
IMPELLA CP PUMP SET	7	0.0%
IMPELLA CP SMARTASSIST	7	0.0%
0550-0008	7	0.0%
GUIDE WIRE 0.018"PTFE COATED	7	0.0%
005062	6	0.0%
LP 5.0	6	0.0%
IMPELLA CP SMART ASSIST SET, EU	6	0.0%
IMPELLA CP SMART ASSIST SET, JP	6	0.0%
AUTOMATED IMPELLA CONTROLLER JP	6	0.0%
004334	6	0.0%
LP 2.5	6	0.0%
0042-0000-US	6	0.0%
ABIOMED, INC.	5	0.0%
IMPELLA CP -JP	5	0.0%
2000154	5	0.0%
OPTICAL AIC W/IMPELLA CONNECT, PKGD, JP	4	0.0%
IMPELLA RP US	4	0.0%
CP C-7 NO ACCESS PUMP SET, US	4	0.0%
IMPELLA 5.5 PUMP 550 SET, EU	4	0.0%
0052-3001	4	0.0%
.018 IN (0.47MM)	4	0.0%
IMPELLA CP SMART ASSIST SET, CANADA	4	0.0%
0042-0010-US	4	0.0%
GUIDE WIRE 0.018" PTFE COATED	4	0.0%
IMPELLA CP- JP	4	0.0%
IMPELLA CP APAC	4	0.0%
0052-3014	4	0.0%
IMPELLA CP - JP	4	0.0%
PUMP 380	4	0.0%
IMPELLA CP	3	0.0%
0043-0002	3	0.0%
0048-003	3	0.0%
2.5	3	0.0%
PUMP 381 PUMP SET (US)	3	0.0%
IMPELLA CP OPTICAL	3	0.0%
IMPELLA 5.5 JP	3	0.0%
IMPELLA CP- EU	3	0.0%
IMPELLA CP SMART ASSIST	3	0.0%
IMPELLA 2.5-JP	3	0.0%
0042-0000	3	0.0%
IMPELLA 5.0-EU	3	0.0%
OPTICAL AIC W/IMPELLA CONNECT,PACK'D, EU	3	0.0%
IMPELLA 5.5 WITH SMARTASSIST SET, EU	3	0.0%
IMPELLA RP FLEX WITH SMART ASSIST	2	0.0%
IMPELLA 5.0 JP	2	0.0%
IMPELLA CP CANADA	2	0.0%
AUTOMATIC IMPELLA CONTROLLER	2	0.0%
IMPELLA CP - APAC	2	0.0%
IMPELLA CONTROLLER, US	2	0.0%
0042-0040	2	0.0%
CANADA 5.0	2	0.0%
IMPELLA CP PUMP SET, CANADA	2	0.0%
0042-0040-US	2	0.0%
IMPELLA 2.5 PUMP	2	0.0%
IMPELLA 5.5 -EU	2	0.0%
IMPELLA 55	2	0.0%
IMPELLA 5.5 SET AU	2	0.0%
IMPELLA CONTROLLER, PACKAGED, CA	2	0.0%
IMPELLA 5.0 IMC PUMPEN SET EU	2	0.0%
CP C-7 14FR PUMP SET, US	2	0.0%
CANADA 5.0 AIC	2	0.0%
0048-0045	2	0.0%
IMPELLA RP PUMP	2	0.0%
IMPELLA PUMP, RP-IJ, STERILE	2	0.0%
0052-3025-JP	2	0.0%
IMPELLA 5.5 SMARTASSIST	2	0.0%
PURGE CASSETTES	2	0.0%
IMEPELLA CP	2	0.0%
IMPELLA 5.5 WITH SMARTASSIST SET	2	0.0%
IMPELLA 5.0-JP	2	0.0%
IMPELLA CP OPTICAL PUMP	1	0.0%
IMPELLA AIC CONTROLLER	1	0.0%
+1(978)739-0590	1	0.0%
DVFB1D4	1	0.0%
AUTOMATED IMPELLA CONTROLLER	1	0.0%
AUTOMATED IMPELLA CONTROLLER S	1	0.0%
P140003	1	0.0%
IMPELLA CP, APAC	1	0.0%
42413	1	0.0%
5.0 CATHETER	1	0.0%
GUIDE WIRE, 0.018", PTFE COATED	1	0.0%
IMPELLA AUTOMATED CONTROLLER *(AIC)	1	0.0%
V8.2	1	0.0%
IMPELLA LR 0.018¿ PTFE GUIDEWIRE	1	0.0%
IMPELLA 5.0 IMC PUMP SET CANADA	1	0.0%
LOG1508821329	1	0.0%
0048-0024	1	0.0%
IMPELLA 5.0 PUMP SET APAC	1	0.0%
01-00813502010879101357925	1	0.0%
138129	1	0.0%
004603	1	0.0%
0042-0020	1	0.0%
IMPELLA RP US HDE PUMP SET	1	0.0%
5.0	1	0.0%
0052-0001	1	0.0%
004680	1	0.0%
AUTOMATED IMPELLA CONTROLLER-EU	1	0.0%
2.5 LITERS	1	0.0%
LP2	1	0.0%
IMPELLA RP PUMP SET, EU	1	0.0%
AUTOMATEDIMPELLA CONTROLLER	1	0.0%
NO NUMBER	1	0.0%
R9G0042400	1	0.0%
005042	1	0.0%
.018" (0.47MM)	1	0.0%
.018 IN (0.47 MM)	1	0.0%
0043-0001	1	0.0%
52277 - ONLY NUMBER LOCATED DUE TO HEAVY BIOBURDEN	1	0.0%
0046-3061	1	0.0%
14F	1	0.0%
IMP;ELLA CP	1	0.0%
IMPLELLA CP	1	0.0%
CP 00480003	1	0.0%
IMPLELLA LP5.0	1	0.0%
NOT KNOWN	1	0.0%
IMPELLLA CP	1	0.0%
05500008	1	0.0%
IMPELLA CP0048-0003	1	0.0%
0048-0003.0814	1	0.0%
00813502010879 IMPELLA CP	1	0.0%
IMPELLA CP , JP	1	0.0%
IMPELLA AUTOMATED CONTROLLER	1	0.0%
IMPELLA 2.5 AIC PUMP SET	1	0.0%
129265	1	0.0%
IMPEALL 5.0	1	0.0%
0048-0002	1	0.0%
0048-000	1	0.0%
UNK	1	0.0%
0500-0008	1	0.0%
363274	1	0.0%
IMPELLA 5.5 WITH SMART ASSIST EU	1	0.0%
AUTOMATED IMPELLA CONTROOLLER	1	0.0%
IMPELLA CP SMART - JP	1	0.0%
0052-3005	1	0.0%
UNKNOWN IMPELLA	1	0.0%
0042-000-US	1	0.0%
1000323	1	0.0%
IMPELL CP	1	0.0%
IMPELLA PUMP 450	1	0.0%
0052-3046	1	0.0%
IMPELLA 550	1	0.0%
AUTOMATED INPELLA CONTROLLER	1	0.0%
0048-3092	1	0.0%
AUTOMATED IMPELLA CONTROLLER (AIC	1	0.0%
IMPELLA CP-CANADA	1	0.0%
LOG1517941891	1	0.0%
IMPELLA CP SMART ASSIST SET	1	0.0%
IMPELLA CP-AU	1	0.0%
IMPELLA CP -EU	1	0.0%
PUMP 5.5	1	0.0%
0048-0014	1	0.0%
IMPELLA CP P	1	0.0%
IMPELLA R	1	0.0%
IMPELLA RP SMART ASSIST	1	0.0%
IMPELLA 5.5 WITH	1	0.0%
IMPELLA CP - JAPAN	1	0.0%
IMAUTOMATED IMPELLA CONTROLLER	1	0.0%
AUTOMATED IMPELLA CONTROLLER EU	1	0.0%
IMPELLA CP - CANADA	1	0.0%
IMPELLA CONTROLLER US	1	0.0%
IMPELLA OPTICAL CONTROLLER, UK	1	0.0%
AUTOMATED IMPELLA CONTROLLER, JP	1	0.0%
PUMP 371 14F LT CMR SET (US)	1	0.0%
IMPELLA OPTICAL CONTROLLER, PACKAGED, UK	1	0.0%
IMPELLA 5.5 WITH SMARTASSIST	1	0.0%
IMPELLA 2.5 JAPAN	1	0.0%
AIC CONTROLLER	1	0.0%
IMPELLA CONTROLLER EU	1	0.0%
LMPELLA DEVICE	1	0.0%
IMPELLA 5.5 EU	1	0.0%
IMPELLA CONNECT	1	0.0%
IMPELLA CP - EU	1	0.0%
IMPELLA PURGE CASSETTE	1	0.0%
IMPELLA CP)	1	0.0%
23-13676	1	0.0%
IMPELLA CP SET WITH SMARTASSIST	1	0.0%
IMPELLA CP WITH SMARTASSIST	1	0.0%
IMPELLA CP -CANADA	1	0.0%
GUIDE WIRE 0.018"	1	0.0%
IMEPLLA 5.5	1	0.0%
IMPELLA 5.5 -JP	1	0.0%
IMPELLA 5.5 -CA	1	0.0%
IPX1	1	0.0%
08-NOV-2023	1	0.0%
IMPELLA 5.5, - EU	1	0.0%
IMPELLA 5.5, EU	1	0.0%
REF 0048-0003	1	0.0%
IMPELLA PUMP 5.5	1	0.0%
IMPELLA 2.5 AIC PUMP SET (CHINA, INDIA)	1	0.0%
0042-0000-UK	1	0.0%
IMEPLLA CP PUMP	1	0.0%
1000080	1	0.0%
IMPELLA 5,5	1	0.0%
OPTICAL, AIC, IMPELLA CONNECT, PKGD, UK	1	0.0%
IMPELLA 5.5 SMARTASSIST S2 SET, JP	1	0.0%
IMPELLA 5.0 - JAPAN	1	0.0%
CP IMPELLA	1	0.0%
49845A	1	0.0%
Manufacturer	Frequency	Percentage
ABIOMED, INC.	33730	87.9%
ABIOMED, INC. - 1220648	1800	4.7%
ABIOMED, INC	1136	3.0%
ABIOMED INC.	590	1.5%
ABIOMED	340	0.9%
ABIOMED EUROPE GMBH	291	0.8%
ABIOMED. INC.	171	0.4%
OSCOR INC.	132	0.3%
ABIOMED EUROPE, GMBH (GERMANY)	33	0.1%
ABIOMED EUROPE GMBH (GERMANY)	21	0.1%
OSCOR INC	17	0.0%
ABIOMED INC	14	0.0%
ABIOMED EUROPE	13	0.0%
IMPELLA CP	11	0.0%
ABIOMED, INC. -	10	0.0%
ABIOMED,INC	6	0.0%
ABIOMED EUROPE GMBH - 3007904765	6	0.0%
ABIOMED, INC,	5	0.0%
AACHEN, GERMANY	5	0.0%
DANVERS, MA	4	0.0%
ABOIMED, INC.	3	0.0%
ABIOMED. INC	3	0.0%
ABOIMED, INC	3	0.0%
ABIOMED,INC.	3	0.0%
UNKNOWN	2	0.0%
AUTOMATED IMPELLA CONTROLLER	2	0.0%
ABIOMED IN.	2	0.0%
IMPELLA 5.5	2	0.0%
INTEGER	2	0.0%
ABIOMED EUROPE, GMBH	2	0.0%
ABIOMED, IN.	2	0.0%
OSCOR.INC	2	0.0%
JOHNSON & JOHNSON / ABIOMED, INC.	2	0.0%
ABIOMED, IN.C	2	0.0%
AIOMED, INC.	1	0.0%
UNK	1	0.0%
MEDTRONIC INC.	1	0.0%
22 CHERRY HILL DR	1	0.0%
ABIOMED UNKNOWN	1	0.0%
ABIOMED EU	1	0.0%
ABIOMED, INC.V	1	0.0%
INTEGER HOLDINGS CORPORATION	1	0.0%
ABIOMED , INC.	1	0.0%
ABIOMED, INC. US HEADQUARTERS	1	0.0%
ABIOMED.INC.	1	0.0%
ABIOMED INC,	1	0.0%
ABIOMD, INC.	1	0.0%
ABOIOMED, INC	1	0.0%
ABIONED, INC	1	0.0%
ABIOMEND, INC.	1	0.0%
ABIMED, INC	1	0.0%
ABIOMED, INC.,	1	0.0%
ABIOMED, IND.	1	0.0%
ABIOMED, IINC.	1	0.0%
ABIMED, INC.	1	0.0%
ABIOMED, INC..	1	0.0%
ABIOMED, INC.ABIOMED, INC.ABIOMED, INC.ABIOMED, IN	1	0.0%
ABIOMED ,INC	1	0.0%
ABIOMED.INC	1	0.0%
ANGIOMED, INC.	1	0.0%
BIOMED, INC	1	0.0%
Manufacturer Country	Frequency	Percentage
US	37859	98.9%
GM	407	1.1%
AF	1	0.0%
AO	1	0.0%
GT	1	0.0%
Brand Name	Frequency	Percentage
IMPELLA CP	20673	53.8%
IMPELLA 5.5	7633	19.9%
AUTOMATED IMPELLA CONTROLLER	3939	10.2%
IMPELLA RP	1140	3.0%
IMPELLA 5.5 WITH SMARTASSIST S2 SET, US	728	1.9%
IMPELLA 5.0	631	1.6%
IMPELLA RP FLEX	561	1.5%
IMPELLA 2.5	332	0.9%
IMPELLA CP OPTICAL	250	0.7%
AUTOMATED IMPELLA CONTROLLER (AIC)	227	0.6%
IMPELLA	214	0.6%
IMPELLA CP PUMP	183	0.5%
IMPELLA CP PUMP SET	166	0.4%
IMPELLA CONTROLLER, PACKAGED, US	151	0.4%
IMPELLA CP EU	140	0.4%
OPTICAL, AIC, IMPELLA CONNECT, PKGD, US	119	0.3%
IMPELLA 2.5 PUMP	87	0.2%
IMPELLA LD	64	0.2%
IMPELLA CP OPTICAL PUMP	58	0.2%
INTRODUCER KIT FOR IMPELLA®	53	0.1%
IMPELLA 5.5 PUMP	53	0.1%
IMPELLA CPSA C9+ SET, OUS	52	0.1%
ABIOMED 14F INTRODUCER KIT FOR IMPELLA	48	0.1%
IMPELLA CP-JP	48	0.1%
IMPELLA 5.0 PUMP	46	0.1%
IMPELLA 5.5 WITH SMARTASSIST S2 SET, EU	41	0.1%
IMPELLA LP2.5	40	0.1%
IMPELLA CP SMARTASSIST JP	38	0.1%
IMPELLA 5.5 EU	38	0.1%
IMPELLA CP SMART ASSIST SET, JP	33	0.1%
IMPELLA 5.0 PUMP SET	29	0.1%
IMPELLA CP JP	28	0.1%
IMPELLA CP SMART ASSIST SET, EU	26	0.1%
IMPELLA CONTROLLER, PACKAGED, EU	23	0.1%
IMPELLA 2.5 PUMP SET	22	0.1%
IMPELLA OPTICAL CONTROLLER, PACKAGED, US	21	0.1%
IMPELLA LP5.0	19	0.0%
IMPELLA CP-EU	15	0.0%
IMPELLA 5.5 SMARTASSIST S2 SET, JP	15	0.0%
AUTOMATED IMPELLA CONTROLLER EU	13	0.0%
INTRODUCER KIT FOR IMPELLA	13	0.0%
IMPELLA RP PUMP	12	0.0%
OPTICAL AIC W/IMPELLA CONNECT,PACK'D, EU	12	0.0%
ABIOMED INTRODUCER KIT FOR IMPELLA®	11	0.0%
ABIOMED INTRODUCER KIT FOR IMPELLA	10	0.0%
IMPELLA PURGE CASSETTE	10	0.0%
IMPELLA OPTICAL CONTROLLER, PACKAGED, EU	10	0.0%
IMPELLA RECOVER LP 2.5 PERCUTANEOUS CS	10	0.0%
IMPELLA 5.5 WITH SMARTASSIST	9	0.0%
IMPELLA CP PUMP SET, US	9	0.0%
IMPELLA 5.5 JP	8	0.0%
ABIOMED IMPELLA CP	8	0.0%
IMPELLA CP SMART ASSIST PUMP	8	0.0%
IMPELLA LP 5.0 PUMP	8	0.0%
IMPELLA 5.0-EU	8	0.0%
ABIOMED 23F INTRODUCER KIT FOR IMPELLA	7	0.0%
IMPELLA 2.5-EU	7	0.0%
IMPELLA RECOVER LP 2.5 PERC CARDIAC SUPPORT	7	0.0%
IMPELLA LP 2.5 PUMP	7	0.0%
IMPELLA CONTROLLER, PACKAGED, JP	7	0.0%
IMPELLA CP SMARTASSIST	6	0.0%
IMPELLA CP SET	6	0.0%
IMPELLA CP SMART ASSIST	6	0.0%
IMPELLA RP EU	6	0.0%
ABIOMED IMPELLA	6	0.0%
IMPELLA 5.0 EU	5	0.0%
IMPELLA CONTROLLER	5	0.0%
IMPELLA LP5.0 PUMP	5	0.0%
ABIOMED IMPELLA 5.5	5	0.0%
IMPELLA RECOVER LP 2.5, .018 GUIDEWIRE	5	0.0%
OPTICAL AIC W/IMPELLA CONNECT, PKGD, JP	5	0.0%
IMPELLA PUMP, RP-IJ, STERILE	5	0.0%
AUTOMATED IMPELLA CONTROLLER JP	4	0.0%
IMPELLA LP 2.5	4	0.0%
IMPELLA 5.5 SMARTASSIST	4	0.0%
IMPELLA 5.5 WITH SMART ASSIST	4	0.0%
IMPELLA 5.5 SMART ASSIST PUMP	3	0.0%
IMPELLA 5.5 SMARTASSIST SET, JP	3	0.0%
IMPELLA CP PUMP SET, EU	3	0.0%
IMPELLA CP - EU	3	0.0%
IMPELLA CP SMART ASSIST SET APAC	3	0.0%
AUTOMATIC IMPELLA CONTROLLER	3	0.0%
ABIOMED 14F INTRODUCER KIT FOR IMPELLA,	3	0.0%
IMPELLA PUMP	3	0.0%
SYSTEM, IMPELLA 2.5	3	0.0%
IMPELLA 5.5-EU	3	0.0%
IMPELLA CP	3	0.0%
IMPELLA 2.5-JP	3	0.0%
IMPELLA RECOVER LP2.5 PERC CARDIAC SUPPORT	3	0.0%
IMPELLA HEART PUMP	3	0.0%
IMPELLA RP PUMP SET, EU	3	0.0%
IMPELLA CONTROLLER, PACKAGED, CA	2	0.0%
IMPELLA RECOVER LP 2.5 CARDIAC SUPPORT SYSTEM	2	0.0%
IMPELLA CP WITH SMARTASSIST	2	0.0%
ABIOMED IMPELLA 5.0	2	0.0%
IMPELLA 5	2	0.0%
ABIOMED 14 F INTRODUCER KIT FOR IMPELLA	2	0.0%
ABIOMED INTRODUCER KIT FOR IMPELLA 23F	2	0.0%
IMPELLA LP2.5 AIC PUMP SET, US	2	0.0%
IMPELLA 5.5 WITH SMARTASSIST SET, US	2	0.0%
IMPELLA CP SET WITH SMARTASSIST	2	0.0%
IMPELLA CP - JP	2	0.0%
IMPELLA 5.5.	2	0.0%
IMPELLA CP PUMP SET,	2	0.0%
IMPELLA 5.5	2	0.0%
IMPELLA 2.5 EU	2	0.0%
IMPELLA 5.0-JP	2	0.0%
IMPELLA 5.5 PUP	1	0.0%
IMPELLA CP SET HOSPITAL ITEM # 83682	1	0.0%
IMPELLA 2.5 OR IMPELLA CP	1	0.0%
AICD VISIA AF MRI SURESCAN DEFIBRILLATOR	1	0.0%
PACEMAKER	1	0.0%
PURGE CASSETTE; Y CONNECTOR; IMPELLA	1	0.0%
IMPELLA VAD MOBILE CONSOLE	1	0.0%
ABIOMED 14F INTRODUCER KIT FOR IMPELLA.	1	0.0%
IMPELLA CP OPTICAL WITH SMART ASSIST	1	0.0%
IMPELLA TEMPORARY LVAD	1	0.0%
IMPELLA :LP5.0	1	0.0%
IMPELLA LP 5.0	1	0.0%
IMPELLA AIC 2.5 PUMP SET, 13FR INTRODUCER	1	0.0%
AUTOMATED IMPELLA CONTROLLER/PURGE CASSETTE	1	0.0%
CONTROLLER, ABIOMED IMPELLA	1	0.0%
CONTROLLER, AUTOMATED IMPELLA	1	0.0%
SET, IMPELLA 5.0	1	0.0%
SET, IMPELLA 2.5	1	0.0%
IMPELLA RECOVER LP 2.5, .018" GUIDEWIRE	1	0.0%
IMPELLA RECOVERY LP2.5 PERC CARDIAC SUPPORT	1	0.0%
SYSTEM, CIRCULATORY, SUPPORT, IMPELLA 2.5	1	0.0%
CATHETER, IMPELLA 2.5	1	0.0%
IMPELLA PUMP KIT 2.5	1	0.0%
CONSOLE FOR IMPELLA 2.5	1	0.0%
IMPELLA RECOVER LP2.5 CARDIAC SUPPORT SYSTEM	1	0.0%
IMPELLA 2.5 VAD	1	0.0%
IMPELLA PUMP 14FR 65CM	1	0.0%
IMPELLA 2.5 DEVICE	1	0.0%
IMPELLA CP CATHETER	1	0.0%
IMPELLA 5.0 AIC PUMP SET US	1	0.0%
IMPELLA R. P. DEVICE	1	0.0%
ABIOMED INTRODUCER 14F INTRODUCER KIT FOR IMPELLA	1	0.0%
ABIOMED IMPELLA HEART PUMP	1	0.0%
IMPELLA RP SET	1	0.0%
ABIOMED IMPELLA CP PERCUTANIOUS LVAD	1	0.0%
IMPELLA CP, PERCUTANEOUS HEART PUMP	1	0.0%
IMPELLA CP LMR	1	0.0%
IMPELLA INTRODUCER KIT	1	0.0%
ABIOMED 23 F INTRODUCER KIT FOR IMPELLA	1	0.0%
IMPELLA 5.0 IMC PUMP SET EU	1	0.0%
IMPELLA RP US HDE PUMP SET	1	0.0%
IMPELLA RP US HDE PUMP SET US	1	0.0%
IMPELLA CP PUMP SET	1	0.0%
CATHETER IMPELLA AIC 5.0 VENTRICULAR ASSIST DEVICE	1	0.0%
IMPELLA 5.5. PUMP	1	0.0%
AUTOMATED IMPELLA CONTROLLER,	1	0.0%
TESTED OPTICAL AIC W/IMPELLA CONNECT	1	0.0%
ABIOMED 23F INTRODUCER KIT FOR IMPELLA®	1	0.0%
AUTOMATED IMPELLA CONTROOLLER	1	0.0%
IMPELLA, SMART ASSIST 5.5	1	0.0%
IMPELLA 5.5 VENTRICULAR ASSIST DEVICE	1	0.0%
ABIOMED INC KIT VENTRICULAR ASSIST DEVICE PUMP IMPELLA 5.5 SMARTASSIST	1	0.0%
IMPELLA CP 14 FR	1	0.0%
IMPELLA CP HEART PUMP	1	0.0%
PUMP HEART IMPELLA 5.5 W/SMART ASSIST S2	1	0.0%
IMPELLA RP SMART- ASSIST CATHETER	1	0.0%
IMPELLA CONSOLE	1	0.0%
IMPELLA SMART ASSIST.5	1	0.0%
IMPELLA CATH DEVICE	1	0.0%
IMPELLA 5.5-CA	1	0.0%
IMPELLA 5.5-JP	1	0.0%
IMPELLA CP-CA	1	0.0%
IMPELLA CP AND IMPELLA AUTOMATED IMPELLA CONSOLE (AIC)	1	0.0%
IMPELLA CP PUMP.	1	0.0%
P9 IMPELLA SWAN CL	1	0.0%
IMPELLA OPTICAL CONTROLLER	1	0.0%
AUTOMATED IMPELLA CONTROLLER U	1	0.0%
AUTMATED IMPELLA CONTROLLER	1	0.0%
IMPELLA PURGE TUBING	1	0.0%
AUTOMATED IMPELLA CONTROLLER	1	0.0%
PUMP 371 14F IMPELLA CPLT CMR SET	1	0.0%
IMPELLA CP , JP	1	0.0%
IMPELLA CP-CANADA	1	0.0%
IMPELLA 5.5 WITH SMARTASSIST SET, EU	1	0.0%
CATHETER HEART PUMP IMPELLA	1	0.0%
IMPELLA 5.5 WITH SMARTASSIST SET, CA	1	0.0%
IMPELLA CP SMART ASSIST SET, CANADA	1	0.0%
IMPELLA CP PUMP 371 SET, US	1	0.0%
UNKNOWN IMPELLA	1	0.0%
AUTOMATEC IMPELLA CONTROLLER	1	0.0%
IMPELLA CP PERCUTANEOUS HEART PUMP	1	0.0%
ABIOMED IMPELLA CONTROLLER	1	0.0%
IMPELLA PURGE LINE	1	0.0%
IMPELLA LR 0.018 PTFE GUIDEWIRE	1	0.0%
ABIOMED IMPELLA CP WITH SMARTASSIST	1	0.0%
IMPELLA 5.0 PUMP SET,	1	0.0%
IMPELLA 2.5 PUMP SET,	1	0.0%
ABIOMED IMPELLA RP	1	0.0%
IMPELLA LD PUMP	1	0.0%
IMPELLA 5.5 WITH SMARTASSIST SET	1	0.0%
IMPELLA CP SMART ASSIST	1	0.0%
ABIOMED 14FR IMPELLA CP	1	0.0%
IMPELLA 5.5 21 FR	1	0.0%
IMPELLA CP FILTER	1	0.0%
CATH CP IMPELLA 14F	1	0.0%
IMPELLA AIC CONTROLLER	1	0.0%
IMPELLA CPOPTICAL	1	0.0%
IMPELLA CP OPTICA	1	0.0%
BIOMED INTRODUCER KIT FOR IMPELLA®	1	0.0%
UNSPECIFIED IMPELLA PUMP	1	0.0%
IMPELLA 5.5 SMART ASSIST	1	0.0%
IMPELLA CONNECT	1	0.0%
IMPELLA CONTROLLER EU	1	0.0%
IMPELLA IMPELLAR CATHETER	1	0.0%
IMPELLA LEFT DIRECT	1	0.0%
IMPELLA 5.0 JP	1	0.0%
IMPELLA CP- JP	1	0.0%
IMPELLA AUTOMATED CONTROLLER (AIC)	1	0.0%
ABIOMED IMPELLA DEVICE	1	0.0%
CP IMPELLA	1	0.0%
IMPELLA 5.5 HEART PUMP	1	0.0%
IMPELLA RECOVER LP 2.5 PECUTANEOUS CARDIAC S	1	0.0%
Product Class	Frequency	Percentage
TEMPORARY NON-ROLLER TYPE LEFT HEART SUPPORT BLOOD PUMP	32910	85.7%
CONTROL, PUMP SPEED, CARDIOPULMONARY BYPASS	1809	4.7%
TEMPORARY NON-ROLLER TYPE RIGHT HEART SUPPORT BLOOD PUMP	1733	4.5%
AUTOMATED IMPELLA CONTROLLER (AIC)	509	1.3%
TEMPORARY NON-ROLLER TYPE LEFT HEART SUPPORT BLOOD PUMP,	312	0.8%
TEMPORARY NON-ROLLER TYPE LEFT HEART SUPPORT BLOOD PUMP	182	0.5%
INTRODUCER, CATHETER	149	0.4%
TEMPORARY NONROLLER TYPE LEFT HEART SUPPORT BLOOD PUMP	137	0.4%
TEMPORARY CARDIAC SUPPORT BLOOD PUMP	104	0.3%
CONTROL,, PUMP SPEED, CARDIOPULMONARY BYPASS	93	0.2%
IMPELLA CP	36	0.1%
PUMP, BLOOD, CARDIOPULMONARY BYPASS, NON-ROLLER TYPE	28	0.1%
AUTOMATED IMPELLA CONTROLLER	26	0.1%
TEMPORARY NON-ROLLER TYPE RIGHT HEART SUPPORT BLOOD PUMP	25	0.1%
TEMPORARY NON-ROLLER TYPE CARDIAC SUPPORT BLOOD PUMP	19	0.0%
RIGHT VENTRICULAR BYPASS (ASSIST) DEVICE	19	0.0%
TEMPORARY NON-ROLLER TYPE LEFTHEART SUPPORT BLOOD PUMP	19	0.0%
WIRE, GUIDE, CATHETER	15	0.0%
TEMPORARY NON-ROLLER TYPE RIGHT HEART SUPPORT BLOOD PUMP	13	0.0%
: TEMPORARY NON-ROLLER TYPE LEFT HEART SUPPORT BLOOD PUMP	12	0.0%
TEMPORARY NON ROLLER TYPE LEFT HEART SUPPORT BLOOD PUMP	8	0.0%
IMPELLA	6	0.0%
TEMPORARY NON-ROLLER TYPE LEFT HEART SUPPORT BLOOD PUMP, OZD	6	0.0%
HEART PUMP	5	0.0%
TEMPORARY NON-ROLLER TYPE LEFT HEART SUPPORT BLOOD PUMP, PRODUCT	4	0.0%
IMPELLA 5.0	4	0.0%
TEMPORARY NON-ROLLER TYPE LEFT HEART SUPPORT BLOOD PUMPTEMPORARY NON-ROLLER TYPE	4	0.0%
TEMPORARY NON-ROLLER TYPE RIGHT HEART SUPPORT BLOOD PUMP,	4	0.0%
TEMPORARY NONROLLER TYPE RIGHT HEART SUPPORT BLOOD PUMP	4	0.0%
IMPELLA 5.0 AIC PUMP SET	4	0.0%
TEMPORARY CARDIAC SUPPORT BLOOD PUMP,	4	0.0%
TEMPORARY CARDIAC SUPPORT BLOOD PUMP, PRODUCT CODE: OZD	4	0.0%
TEMPORARY NON-ROLLER TYPE RIGHT HEART SUPPORT BLOOD PUMP	4	0.0%
INTRODUCER, CATHETER, PRODUCT CODE: DYB	4	0.0%
TEMPORARY NON-ROLLER TYPE LEFT HEART SUPPORT BLOOD PUMP.	4	0.0%
TEMPORARY NON-ROLLER TYPE LEFT HEART SUPPORT BLOOD	3	0.0%
PUMP, BLOOD, CARDIOPULMONARY BYPASS	3	0.0%
IMPELLA 2.5 AIC PUMP SET	3	0.0%
UNKNOWN	3	0.0%
IMPELLA 5.5	3	0.0%
IMPELLA RP	3	0.0%
PUMP, BLOOD	3	0.0%
TEMPORARY NON-ROLLER TYPE RIGHT HEART SUPPORT BLOOD PUMP, OZD	2	0.0%
CATHETER, CARDIAC ASSIST PUMP	2	0.0%
IMPELLA 2.5	2	0.0%
: TEMPORARY NON-ROLLER TYPE LEFT HEART SUPPORT BLOOD PUMP,	2	0.0%
2)TEMPORARY NON-ROLLER TYPE LEFT HEART SUPPORT BLOOD PUMP	2	0.0%
TEMPORARY CARDIAC SUPPORT	2	0.0%
TEMPORARY CARDIAC SUPPORT BLOOD PUMP,,	2	0.0%
RIGHT VENTRICULAR BYPASS ASSIST DEVICE	2	0.0%
IMPELLA 5.0 AIC PUMP SET US	2	0.0%
IMPELLA CONTROLLER	2	0.0%
CATHETER, INTRAVASCULAR, DIAGNOSTIC	2	0.0%
VENTRICULAR ASSIST DEVICE	2	0.0%
IABP	2	0.0%
TEMPORARY NON-ROLLER TYPE LEFT HEART SUPPOR BLOOD PUMP	2	0.0%
IMPELLA CATHETER	2	0.0%
RP FLEX W SMART ASSIST SET, US	2	0.0%
EMPORARY NON-ROLLER TYPE LEFT HEART SUPPORT BLOOD PUMP	2	0.0%
3)TEMPORARY NON-ROLLER TYPE LEFT HEART SUPPORT BLOOD PUMP	2	0.0%
OZD TEMPORARY NON-ROLLER TYPE LEFT HEART SUPPORT BLOOD PUMP	2	0.0%
TEMPORARY NON-ROLLER TYPE LEFT HEART SUPPORT BLOOD PUM	2	0.0%
TEMPORARY NON-ROLLER TYPE LEFT HEART SUPPORT BLOOD PUMP CP	2	0.0%
P140003	2	0.0%
TEMPORARY NON-ROLLER TYPE LEFT HEART SUPPORT BLOOD PUM	2	0.0%
PUMP, BLOOD, CARDIOPULMONARY BYPASS, NON-ROLLER TYPE, CATHETER	1	0.0%
TEMPORARY NON-ROLLER TYPE LEFT EART SUPPORT BLOOD PUMP	1	0.0%
TEMPORARY CARDIA SUPPORT BLOOD PUMP	1	0.0%
TEMPORARY NON-ROLLER TYPE RIGHT HEART SUPPORT BLOOD PUMP	1	0.0%
PUMP, BLOOD CARDIOPULMONARY BYPASS NON-ROLLER TYPE	1	0.0%
ABIOMED IMPELLA CP PERCUTANIOUS LVAD	1	0.0%
IMPELLA TEMPORARY LVAD	1	0.0%
PUMP, BLOOD, CARDIOPLMONARY BYPASS, NON-ROLLER TYPE	1	0.0%
PUMP, BLOOD, CARDIOPULMONARY, BYPASS, NON-ROLLER TYPE	1	0.0%
TEMPORARY CARDIAC SUPPORT BLOOD PUMP, PRODUCT CODE: PBL	1	0.0%
IMPELLA CP, PERCUTANEOUS HEART PUMP	1	0.0%
TEMPORARY NON-ROLLERT TYPE LEFT HEART SUPPORT BLOOD PUMP	1	0.0%
PC-001938978	1	0.0%
IMPELLA CP PUMP SET, US	1	0.0%
TEMPORARY NON-ROLLER TYPE LEFT HEART SUPPORT BLOOD PUMP O	1	0.0%
CARDIOPULMONARY BYPASS SYSTEM	1	0.0%
CP SET	1	0.0%
LEFT HEART SUPPORT BLOOD PUMP	1	0.0%
PUMP, BLOOD, CARDIOPULMONARY BYPASS, NON-ROLLER TYPE,	1	0.0%
IMPELLA CP PUMP SET	1	0.0%
CONTROL,,PUMP SPEED, CARDIOPULMONARY BYPASS	1	0.0%
NAME: TEMPORARY NON-ROLLER TYPE LEFT HEART SUPPORT BLOOD PUMP	1	0.0%
IMPELLA RPPYXTEMPORARY NON-ROLLER TYPE RIGHT HEART SUPPORT BLOOD PUMP	1	0.0%
TEMPORARY CARDIAC BLOOD SUPPORT PUMP	1	0.0%
CATHETER	1	0.0%
IMPELLA LP2.5	1	0.0%
PUMP, CATHETER BASED	1	0.0%
PUMP, BLOOD, CARDIOPULMONARY BYPASS NON-ROLLER TYPE	1	0.0%
CONSOLE, PUMP, BLOOD, CARDIOPULMONARY BYPASS, NON-ROLLER TYP	1	0.0%
CATHETER,PUMP, BLOOD, CARDIOPULMONARY BYPASS, NON-ROLLER TYP	1	0.0%
LEFT VENTRICULAR ASSIST DEVICE - TEMPORARY	1	0.0%
MEDICAL DEVICE (IABP)	1	0.0%
IMPELLA ASSIST DEVICE	1	0.0%
CATHETER TO INTRAVASCULAR BLOOD PUMP	1	0.0%
ABIOMED IMPELLA PURGE CASSETTE	1	0.0%
IMPELLA MOBILE CONSOLE AND POWER SUPPLY	1	0.0%
IMPELLA CATHETER 2.5	1	0.0%
INTRACARDIAC LV PUMP KIT	1	0.0%
INTRACARDIAC LV PUMP	1	0.0%
CONTROL INTERFACE FOR IMPELLA	1	0.0%
HEART PUMP/PURGE CASSETTE	1	0.0%
TEMPORARY NON-ROLLER TYPE RIGHT HEART SUPPORT BLOOD PUMP:	1	0.0%
IMPELLA CPSA	1	0.0%
OZDTEMPORARY NON-ROLLER TYPE LEFT HEART SUPPORT BLOOD PUMP	1	0.0%
LP2.5	1	0.0%
AUTOMATED INTERNAL CONTROLLER (AIC)	1	0.0%
+1(978)739-0590	1	0.0%
BYPASS BLOOD PUMP	1	0.0%
IMPELLA, CP PRODUCT CODE: PBL	1	0.0%
IMPELLA CP, PRODUCT CODE: PBL	1	0.0%
LEFT VENTRICULAR ASSIST DEVICE	1	0.0%
ABIOMED IMPELLA CP	1	0.0%
TEMPORARY CARDIAC SUPPORT PUMP	1	0.0%
IMPELLA LP5.0	1	0.0%
BLOOD PUMP, TEMPORARY CARDIAC SUPPORT	1	0.0%
PUMP, BLOOD,CARDIOPULMONARY BYPASS NON-ROLLER TYPE	1	0.0%
LEFT VENTRICLE ASSIST DEVICE	1	0.0%
DSAMMARCO@ABIOMED.COM	1	0.0%
TEMPORARY NON-ROLLER TYPE RIGHT SIDED HEART SUPPORT BLOOD PUMP	1	0.0%
TEMPORARY NON-ROLLER TYPE LEFT HEART ASSIST BLOOD PUMP	1	0.0%
TEMPORARY NONROLLER TYPE LEFT HEART SUPPORT PUMP	1	0.0%
TEMPORARY NON ROLLER LEFT HEART SUPPORT BLOOD PUMP	1	0.0%
TEMPORAY NONROLLER TYPE RIGHT HEART SUPPORT BLOOD PUMP	1	0.0%
TEMPORARY NONROLLER TYPE LEFT SIDE HEART SUPPORT PUMP	1	0.0%
TEMPORARY NON-ROLLER TYPE LEFT SIDED HEART PUMP	1	0.0%
TEMPORARY NON ROLLER TYPE LEFT HEART SUPPOR BLOOD PUMP	1	0.0%
TEMPORARY RIGHT SIDED HEART SUPPORT BLOOD PUMP	1	0.0%
TEMPORARY NONROLLER TYPE LEFT HEART SUPPOR BLOOD PUMP	1	0.0%
TEMPORARY NON-ROLLER TYPE LEFT HEART SUPPORT BLOOD PUMPVVVVVVVVVV	1	0.0%
IMPELLA CONTROLLER, PACKAGED, EU	1	0.0%
TEMPORARY NON-ROLLER TYPELEFT HEART SUPPORT BLOOD PUMP	1	0.0%
CORONARY ARTERY DISEASE AND DIABETES MELLITUS	1	0.0%
IMPELLA LEFT VENTRICULAR ASSIST DEVICE	1	0.0%
AUTOMATIC IMPELLA CONTROLLER	1	0.0%
IMPELLA AUTOMATED CONTROLLER (AIC)	1	0.0%
TEMPORARY NON-ROLLER TYPE LEFT HEART SUPPORT BLOOD PUMPPPPP	1	0.0%
AUTOMATED IMPELLA CONTROLLER¿(AIC)	1	0.0%
AUTOMATED IMPELLA CONTROLLER¿ (AIC)	1	0.0%
(01)813502011609(10)2022151471(21)359082(17)231130	1	0.0%
TEMPORARY NON-ROLLER TYPED LEFT HEART SUPPORT BLOOD PUMP	1	0.0%
TEMPORARY NON-ROLLER TYPE LEFT HEART SUPPORT BLOO PUMP	1	0.0%
IMPELLA CONTROLLER WITH FLOW CONTROL	1	0.0%
TEMPORARY NON-ROLLER TYPE LERFT HEART SUPPORT BLOOD PUMP	1	0.0%
PUMP 371 14F LT CMR SET	1	0.0%
(01)813502011876(10)2023208255(21)380726(17)240331	1	0.0%
TEMPRORAY NON-ROLLER TYPE LEFT HEART SUPPORT BLOOD PUMP	1	0.0%
TEMPORARY NON-ROLLER TYPE LEFT HEART SUPPORT & BLOOD PUMP	1	0.0%
CONTROL,PUMP SPEED, CARDIOPULMONARY BYPASS	1	0.0%
TEMPORARY NONROLLER TYPED LEFT HEART SUPPORT BLOOD PUMP	1	0.0%
PUMP,BLOOD, CARDIOPULMONARY BYPASS, NON-ROLLER TYPE	1	0.0%
PUMP, BLOOD, CARDIOPLULMONARY BYPASS, NON-ROLLER TYPE	1	0.0%
TEMPORARY LEFT HEART SUPPORT BLOOD PUMP	1	0.0%
RIGHT VENTRICLULAR BYPASS ASSIST DEVICE	1	0.0%
IMPELLA 5.0 HEART PUMP	1	0.0%
TEMPORARY NON-ROLLER TYPE LEFT HEART SUPPORT	1	0.0%
IMPELLA HEART PUMP	1	0.0%
IMPELLA CP EU	1	0.0%
TEMPORARY RIGHT HEART SUPPOR BLOOD PUMP	1	0.0%
TEMPORARY NON-ROLLER LEFT HEART SUPPORT BLOOD PUMP	1	0.0%
TEMPORARY, NON-ROLLER TYPE LEFT HEART SUPPORT BLOOD PUMP	1	0.0%
TEMPORARY NON-ROLLER TYPE LEFT HEART SUPPORT HEART PUMP	1	0.0%
IMPELLA PURGE CASSETTE/TUBING	1	0.0%
TEMPORARY NON ROLLER RIGHT HEART SUPPORT BLOOD PUMP	1	0.0%
TEMPORARY NON ROLLER RIGHT HEART SUPPORT BLOOD PUMP,	1	0.0%
PARTIAL CIRCULATORY SUPPORT	1	0.0%
INTRODUCER, CATHETER,	1	0.0%
P170011	1	0.0%
TEMPORARY NONROLLER TYPE LEFT HEART SUPPORT BLOOD PUMP, PRODUCT	1	0.0%
TEMPORARY NON-ROLLER TYPE LEFT HEART BLOOD PUMP	1	0.0%
MECHANICAL CIRCULATORY SUPPORT DEVICE	1	0.0%
IMPLANTABLE, CARDIOVERTER, DEFIBRILLATOR (NON-CRT)	1	0.0%
IMPLANTABLE PACEMAKER PULSE-GENERATOR	1	0.0%
INTROUDCER, CATHETER	1	0.0%
AUTOMATED IMPELLA CONTROOLLER	1	0.0%
NTRODUCER, CATHETER	1	0.0%
Device Problem	Frequency	Percentage
Adverse Event Without Identified Device or Use Problem	17610	38.8%
Restricted Flow rate	2842	6.3%
Device Sensing Problem	2554	5.6%
Patient-Device Incompatibility	2196	4.8%
Pumping Stopped	1681	3.7%
Positioning Failure	1537	3.4%
Failure to Advance	1376	3.0%
Application Program Problem	1310	2.9%
Increase in Pressure	1243	2.7%
Malposition of Device	939	2.1%
Fluid/Blood Leak	891	2.0%
Deformation Due to Compressive Stress	782	1.7%
Battery Problem	630	1.4%
Activation, Positioning or Separation Problem	620	1.4%
Failure to Read Input Signal	585	1.3%
Patient Device Interaction Problem	562	1.2%
Improper Flow or Infusion	532	1.2%
Positioning Problem	510	1.1%
Material Twisted/Bent	307	0.7%
Difficult to Insert	304	0.7%
Difficult to Advance	300	0.7%
Infusion or Flow Problem	300	0.7%
Material Split, Cut or Torn	273	0.6%
Break	271	0.6%
Defective Device	249	0.5%
No Pressure	241	0.5%
Difficult to Remove	217	0.5%
Computer Operating System Problem	206	0.5%
Crack	196	0.4%
Failure to Pump	180	0.4%
Decrease in Pressure	171	0.4%
Detachment of Device or Device Component	170	0.4%
Failure to Sense	161	0.4%
Fracture	157	0.3%
Failure to Deliver	149	0.3%
Connection Problem	147	0.3%
Priming Problem	137	0.3%
Pressure Problem	130	0.3%
Display or Visual Feedback Problem	124	0.3%
False Alarm	116	0.3%
Unintended Application Program Shut Down	113	0.2%
Use of Device Problem	97	0.2%
Difficult or Delayed Positioning	92	0.2%
Insufficient Information	86	0.2%
Inaccurate Flow Rate	82	0.2%
Insufficient Flow or Under Infusion	78	0.2%
Failure to Prime	66	0.1%
Key or Button Unresponsive/not Working	66	0.1%
Material Deformation	59	0.1%
Material Separation	56	0.1%
Activation Failure	47	0.1%
Material Puncture/Hole	46	0.1%
Device Handling Problem	45	0.1%
Leak/Splash	42	0.1%
Migration or Expulsion of Device	38	0.1%
Backflow	38	0.1%
Device Alarm System	36	0.1%
Power Problem	35	0.1%
Device-Device Incompatibility	33	0.1%
No Apparent Adverse Event	33	0.1%
Optical Problem	32	0.1%
Device Damaged by Another Device	32	0.1%
Separation Problem	31	0.1%
Migration	28	0.1%
Material Integrity Problem	28	0.1%
Device Operates Differently Than Expected	28	0.1%
Human-Device Interface Problem	28	0.1%
Failure to Power Up	28	0.1%
Appropriate Term/Code Not Available	27	0.1%
No Audible Alarm	26	0.1%
Activation Problem	25	0.1%
Pumping Problem	25	0.1%
Kinked	24	0.1%
Device Dislodged or Dislocated	23	0.1%
Obstruction of Flow	23	0.1%
Material Fragmentation	23	0.1%
Unexpected Shutdown	23	0.1%
Difficult to Open or Close	20	0.0%
Suction Problem	20	0.0%
Unintended Movement	20	0.0%
Defective Component	20	0.0%
Delivered as Unsterile Product	20	0.0%
Contamination	19	0.0%
Therapeutic or Diagnostic Output Failure	18	0.0%
Device Damaged Prior to Use	18	0.0%
Improper or Incorrect Procedure or Method	18	0.0%
Defective Alarm	15	0.0%
Device Displays Incorrect Message	15	0.0%
Device Fell	15	0.0%
Failure of Device to Self-Test	14	0.0%
Air/Gas in Device	14	0.0%
Mechanical Problem	14	0.0%
Difficult To Position	13	0.0%
Material Frayed	13	0.0%
Physical Resistance/Sticking	12	0.0%
Communication or Transmission Problem	12	0.0%
Inaccurate Delivery	12	0.0%
Device Issue	11	0.0%
Application Network Problem	11	0.0%
Component Missing	11	0.0%
Protective Measures Problem	10	0.0%
Component Incompatible	10	0.0%
Operating System Becomes Nonfunctional	10	0.0%
Incomplete or Inadequate Priming	10	0.0%
No Display/Image	10	0.0%
Noise, Audible	9	0.0%
Failure to Charge	8	0.0%
Degraded	8	0.0%
Entrapment of Device	8	0.0%
Peeled/Delaminated	7	0.0%
Alarm Not Visible	7	0.0%
Output Problem	7	0.0%
Failure to Run on Battery	6	0.0%
Shipping Damage or Problem	6	0.0%
Product Quality Problem	6	0.0%
Unable to Obtain Readings	6	0.0%
Missing Value Reason	6	0.0%
Failure to Analyze Signal	6	0.0%
Device Difficult to Setup or Prepare	6	0.0%
Packaging Problem	6	0.0%
Overheating of Device	6	0.0%
Tear, Rip or Hole in Device Packaging	6	0.0%
No Flow	6	0.0%
Failure to Select Signal	6	0.0%
Torn Material	5	0.0%
Application Program Freezes, Becomes Nonfunctional	5	0.0%
Physical Resistance	5	0.0%
Device Operational Issue	5	0.0%
Disconnection	5	0.0%
Detachment Of Device Component	5	0.0%
Compatibility Problem	5	0.0%
Loss of Power	5	0.0%
Off-Label Use	4	0.0%
Poor Visibility	4	0.0%
Inaccurate Information	4	0.0%
Inadequate User Interface	4	0.0%
Wrong Label	3	0.0%
Failure to Eject	3	0.0%
Moisture Damage	3	0.0%
Failure to Shut Off	3	0.0%
Device Contamination with Chemical or Other Material	3	0.0%
Mechanical Jam	3	0.0%
Ejection Problem	3	0.0%
Device Emits Odor	3	0.0%
Unraveled Material	3	0.0%
Loss of Data	3	0.0%
Charging Problem	3	0.0%
Material Too Rigid or Stiff	3	0.0%
Electrical /Electronic Property Problem	3	0.0%
Operating System Version or Upgrade Problem	3	0.0%
Device Inoperable	3	0.0%
Erratic or Intermittent Display	3	0.0%
Difficult or Delayed Activation	3	0.0%
Material Perforation	3	0.0%
Component or Accessory Incompatibility	3	0.0%
Device Contaminated at the User Facility	3	0.0%
Unintended Collision	3	0.0%
Material Rupture	3	0.0%
Inadequacy of Device Shape and/or Size	3	0.0%
Electrical Power Problem	3	0.0%
Structural Problem	2	0.0%
High Readings	2	0.0%
No Device Output	2	0.0%
Separation Failure	2	0.0%
Failure to Unfold or Unwrap	2	0.0%
Loose or Intermittent Connection	2	0.0%
Failure to Calibrate	2	0.0%
Sensing Intermittently	2	0.0%
Collapse	2	0.0%
Difficult to Fold, Unfold or Collapse	2	0.0%
Labelling, Instructions for Use or Training Problem	2	0.0%
Incomplete or Inadequate Connection	2	0.0%
Device Stops Intermittently	2	0.0%
Temperature Problem	2	0.0%
Device Difficult to Maintain	2	0.0%
Inappropriate Waveform	2	0.0%
Misassembled	2	0.0%
Bent	2	0.0%
Increased Pump Speed	2	0.0%
Smoking	2	0.0%
Computer Software Problem	2	0.0%
Retraction Problem	2	0.0%
Electromagnetic Interference	2	0.0%
Self-Activation or Keying	2	0.0%
Physical Property Issue	2	0.0%
Material Too Soft/Flexible	2	0.0%
Biocompatibility	2	0.0%
Decreased Pump Speed	1	0.0%
Improper Device Output	1	0.0%
Material Erosion	1	0.0%
Loss of or Failure to Bond	1	0.0%
Inadequate Instructions for Healthcare Professional	1	0.0%
Failure to Infuse	1	0.0%
Unintended Power Up	1	0.0%
Unexpected Therapeutic Results	1	0.0%
Fail-Safe Design Failure	1	0.0%
Energy Output Problem	1	0.0%
Loosening of Implant Not Related to Bone-Ingrowth	1	0.0%
Occlusion Within Device	1	0.0%
High impedance	1	0.0%
Human Factors Issue	1	0.0%
Failure to Reset	1	0.0%
High Sensing Threshold	1	0.0%
Incorrect Or Inadequate Test Results	1	0.0%
Coagulation in Device or Device Ingredient	1	0.0%
Dent in Material	1	0.0%
Difficult or Delayed Separation	1	0.0%
Sticking	1	0.0%
Inadequate or Insufficient Training	1	0.0%
Gas/Air Leak	1	0.0%
Dull, Blunt	1	0.0%
Contamination /Decontamination Problem	1	0.0%
Split	1	0.0%
Coiled	1	0.0%
Circuit Failure	1	0.0%
Incorrect, Inadequate or Imprecise Result or Readings	1	0.0%
Overcorrection	1	0.0%
Manufacturing, Packaging or Shipping Problem	1	0.0%
Expiration Date Error	1	0.0%
Device Difficult to Program or Calibrate	1	0.0%
Premature Separation	1	0.0%
Misassembly by Users	1	0.0%
Date/Time-Related Software Problem	1	0.0%
Blocked Connection	1	0.0%
Unclear Information	1	0.0%
Device Tipped Over	1	0.0%
Use of Incorrect Control/Treatment Settings	1	0.0%
No Fail-Safe Mechanism	1	0.0%
Expulsion	1	0.0%
Component Misassembled	1	0.0%
Unsealed Device Packaging	1	0.0%
Extra Components	1	0.0%
Material Invagination	1	0.0%
Intermittent Energy Output	1	0.0%
Electrical Shorting	1	0.0%
Inaudible or Unclear Audible Prompt/Feedback	1	0.0%
Device Contaminated During Manufacture or Shipping	1	0.0%
Difficult to Open or Remove Packaging Material	1	0.0%
Inappropriate or Unexpected Reset	1	0.0%
Volume Accuracy Problem	1	0.0%
Failure to Disconnect	1	0.0%
Premature Discharge of Battery	1	0.0%
Low Audible Alarm	1	0.0%
Microbial Contamination of Device	1	0.0%
Signal Artifact/Noise	1	0.0%
Excess Flow or Over-Infusion	1	0.0%
Difficult to Flush	1	0.0%
Image Display Error/Artifact	1	0.0%
Increase in Suction	1	0.0%
Inappropriate Audible Prompt/Feedback	1	0.0%
Delayed Alarm	1	0.0%
Pacing Inadequately	1	0.0%
Intermittent Loss of Power	1	0.0%
Accessory Incompatible	1	0.0%
Low Readings	1	0.0%
Application Program Problem: Dose Calculation Error	1	0.0%
Calibration Problem	1	0.0%
Inadequate Filtration Process	1	0.0%
Stretched	1	0.0%
No Visual Prompts/Feedback	1	0.0%
Audible Prompt/Feedback Problem	1	0.0%
Complete Loss of Power	1	0.0%
Device Ingredient or Reagent Problem	1	0.0%
Nonstandard Device	1	0.0%
Patient Problem	Frequency	Percentage
No Clinical Signs, Symptoms or Conditions	15258	31.0%
Hemorrhage/Blood Loss/Bleeding	8029	16.3%
Ischemia	3728	7.6%
Hemolysis	3291	6.7%
Hematoma	2319	4.7%
Thrombosis/Thrombus	2203	4.5%
Tachycardia	1403	2.9%
Arrhythmia	1059	2.2%
Stroke/CVA	940	1.9%
Thrombocytopenia	776	1.6%
Ventricular Fibrillation	676	1.4%
Sepsis	589	1.2%
Vascular Dissection	570	1.2%
Cardiovascular Dysfunction/Insufficiency	537	1.1%
Renal Failure	519	1.1%
Hemodynamic instability	510	1.0%
Perforation of Vessels	422	0.9%
Cardiac Arrest	419	0.9%
Hematuria	404	0.8%
Atrial Fibrillation	366	0.7%
Unspecified Infection	349	0.7%
Low Blood Pressure/ Hypotension	324	0.7%
Blood Loss	321	0.7%
Cardiac Perforation	309	0.6%
Insufficient Information	221	0.4%
Ischemia Stroke	202	0.4%
Unspecified Vascular Problem	183	0.4%
Fever	175	0.4%
Anemia	127	0.3%
Gastrointestinal Hemorrhage	126	0.3%
Perforation	110	0.2%
Pericardial Effusion	107	0.2%
Hemorrhagic Stroke	107	0.2%
Cardiogenic Shock	98	0.2%
Renal Impairment	97	0.2%
No Known Impact Or Consequence To Patient	97	0.2%
Cardiac Tamponade	92	0.2%
Bradycardia	88	0.2%
Respiratory Failure	76	0.2%
Embolism/Embolus	75	0.2%
Aortic Valve Insufficiency/ Regurgitation	72	0.1%
Pain	70	0.1%
Great Vessel Perforation	65	0.1%
Multiple Organ Dysfunction Syndrome	62	0.1%
Heart Failure/Congestive Heart Failure	53	0.1%
Ectopic Heartbeat	53	0.1%
Pulmonary Edema	50	0.1%
Asystole	49	0.1%
Death	49	0.1%
Air Embolism	46	0.1%
Heart Block	46	0.1%
Mitral Valve Insufficiency/ Regurgitation	45	0.1%
Inflammation	43	0.1%
Hypovolemia	41	0.1%
Hemostasis	41	0.1%
Thrombus	35	0.1%
Device Embedded In Tissue or Plaque	34	0.1%
Myocardial Infarction	34	0.1%
No Consequences Or Impact To Patient	29	0.1%
Obstruction/Occlusion	27	0.1%
Valvular Insufficiency/ Regurgitation	27	0.1%
Rupture	26	0.1%
Appropriate Term / Code Not Available	25	0.1%
No Code Available	25	0.1%
Mitral Regurgitation	24	0.0%
Nerve Damage	23	0.0%
Bacterial Infection	23	0.0%
High Blood Pressure/ Hypertension	22	0.0%
Patient Problem/Medical Problem	21	0.0%
Swelling/ Edema	20	0.0%
Intraoperative Cardiac Injury	20	0.0%
Intraoperative Cardiac Valve Injury	19	0.0%
Foreign Body In Patient	18	0.0%
Mitral Perforation	18	0.0%
Retroperitoneal Hemorrhage	18	0.0%
Pseudoaneurysm	17	0.0%
Injury	17	0.0%
Atrial Flutter	16	0.0%
Pulmonary Embolism	15	0.0%
Hemoptysis	14	0.0%
Septic Shock	13	0.0%
Aortic Regurgitation	12	0.0%
No Information	11	0.0%
Aneurysm	11	0.0%
Failure of Implant	11	0.0%
Hypoxia	11	0.0%
Unspecified Kidney or Urinary Problem	10	0.0%
Low Cardiac Output	10	0.0%
Thrombosis	10	0.0%
Aortic Insufficiency	9	0.0%
Necrosis	9	0.0%
Shock	8	0.0%
Intracranial Hemorrhage	8	0.0%
Tricuspid Valve Insufficiency/ Regurgitation	8	0.0%
Pleural Effusion	8	0.0%
Unspecified Heart Problem	8	0.0%
Hypovolemic Shock	7	0.0%
Hemothorax	7	0.0%
Limb Pain	7	0.0%
Exsanguination	7	0.0%
Epistaxis	6	0.0%
Aortic Valve Stenosis	6	0.0%
Disseminated Intravascular Coagulation (DIC)	6	0.0%
Aortic Dissection	6	0.0%
Aortic dissection	6	0.0%
Implant Pain	6	0.0%
Thromboembolism	6	0.0%
Infarction, Cerebral	5	0.0%
Diminished Pulse Pressure	5	0.0%
Chest Pain	5	0.0%
Unspecified Tissue Injury	5	0.0%
Cardiomyopathy	5	0.0%
Liver Failure	5	0.0%
Mitral Insufficiency	5	0.0%
Insufficiency, Valvular	5	0.0%
Hemorrhage, Cerebral	5	0.0%
Brain Injury	5	0.0%
Extravasation	5	0.0%
Transient Ischemic Attack	5	0.0%
Fungal Infection	5	0.0%
Liver Damage/Dysfunction	4	0.0%
Coagulation Disorder	4	0.0%
Stenosis	4	0.0%
Syncope/Fainting	4	0.0%
Pneumothorax	4	0.0%
Cardiopulmonary Arrest	4	0.0%
Convulsion/Seizure	4	0.0%
Peripheral Nervous Injury	4	0.0%
Dyspnea	4	0.0%
Abscess	4	0.0%
Not Applicable	3	0.0%
Hemolytic Anemia	3	0.0%
Abdominal Pain	3	0.0%
Tissue Damage	3	0.0%
Nausea	3	0.0%
Wound Dehiscence	3	0.0%
Calcium Deposits/Calcification	3	0.0%
Altered State of Consciousness	3	0.0%
Low Oxygen Saturation	3	0.0%
Ventricular Tachycardia	3	0.0%
Pneumonia	3	0.0%
Respiratory Insufficiency	3	0.0%
Anxiety	3	0.0%
Delirium	3	0.0%
Myocardial Contusion	2	0.0%
Adhesion(s)	2	0.0%
Ventricle, Abnormality Of	2	0.0%
Intermenstrual Bleeding	2	0.0%
Adult Respiratory Distress Syndrome	2	0.0%
Hypervolemia	2	0.0%
Muscle/Tendon Damage	2	0.0%
Numbness	2	0.0%
Paralysis	2	0.0%
Pulmonary Valve Insufficiency/ Regurgitation	2	0.0%
Vomiting	2	0.0%
Tissue Breakdown	2	0.0%
Respiratory Distress	2	0.0%
Myocarditis	2	0.0%
Reduced Blood Flow	2	0.0%
Unspecified Nervous System Problem	2	0.0%
Cusp Tear	2	0.0%
Heart Failure	2	0.0%
Unspecified Hepatic or Biliary Problem	2	0.0%
Foreign Body Embolism	2	0.0%
Respiratory Arrest	2	0.0%
Left Ventricular Failure	2	0.0%
Hernia	2	0.0%
Ulcer	2	0.0%
Unspecified Gastrointestinal Problem	2	0.0%
Scar Tissue	1	0.0%
Fasciitis	1	0.0%
Laceration(s)	1	0.0%
Peripheral Vascular Disease	1	0.0%
Venipuncture	1	0.0%
Occlusion	1	0.0%
Bone Fracture(s)	1	0.0%
Loss Of Pulse	1	0.0%
Seizures	1	0.0%
Swelling	1	0.0%
Vaso-Vagal Response	1	0.0%
Complaint, Ill-Defined	1	0.0%
Irregular Pulse	1	0.0%
Angina	1	0.0%
Vascular System (Circulation), Impaired	1	0.0%
Electric Shock	1	0.0%
Skin Tears	1	0.0%
Regurgitation, Valvular	1	0.0%
Missing Value Reason	1	0.0%
Infiltration into Tissue	1	0.0%
Complete Heart Block	1	0.0%
Dizziness	1	0.0%
Underdose	1	0.0%
Depression	1	0.0%
Impotence	1	0.0%
Fatigue	1	0.0%
Diaphoresis	1	0.0%
Abdominal Distention	1	0.0%
Respiratory Tract Infection	1	0.0%
Ventilator Dependent	1	0.0%
Atrial Perforation	1	0.0%
Lactate Dehydrogenase Increased	1	0.0%
Undesired Nerve Stimulation	1	0.0%
Intracranial Pressure Increased	1	0.0%
Valvular Stenosis	1	0.0%
Unspecified Respiratory Problem	1	0.0%
Fall	1	0.0%
Fistula	1	0.0%
Seroma	1	0.0%
Cytomegalovirus (CMV) Infection	1	0.0%
Cerebral Edema	1	0.0%
Bronchial Hemorrhage	1	0.0%
Failure to Anastomose	1	0.0%
Low Pulmonary Arterial Wedge Pressure	1	0.0%
Bruise/Contusion	1	0.0%
Wound Infection	1	0.0%
Pallor	1	0.0%
Pulmonary Hypertension	1	0.0%
Melena	1	0.0%
Myalgia	1	0.0%
Encephalopathy	1	0.0%
Mitral Valve Stenosis	1	0.0%
Exposure to Body Fluids	1	0.0%
Increased Respiratory Rate	1	0.0%
Reperfusion Injury	1	0.0%
Left Ventricular Dysfunction	1	0.0%
Skin Infection	1	0.0%
Movement Disorder	1	0.0%
Hyperglycemia	1	0.0%
Decreased Respiratory Rate	1	0.0%
Constipation	1	0.0%
Loss of Vision	1	0.0%
Alteration in Body Temperature	1	0.0%
Loss of consciousness	1	0.0%
Unspecified Eye / Vision Problem	1	0.0%
Nervous System Injury	1	0.0%
Skin Discoloration	1	0.0%
Cardiac Enzyme Elevation	1	0.0%
Non specific EKG/ECG Changes	1	0.0%
Neuropathy	1	0.0%
Sudden Cardiac Death	1	0.0%
Summary
Events Missing Patient Data
Event Id	Report Number
33133	1220648-2023-04666
33136	1220648-2023-04670
33137	1220648-2023-04669
36476	1220648-2022-01318
