# Supplementary material
Source: Research Square preprint supplement (doi:10.21203/rs.3.rs-9990811/v1)
Supplement: Supplementary file 5 [file f26da29d1a0d8ce76c610853.xlsx]

## Sheet: Events
Event ID	Report Number	MDR Report Key	MAUDE Report Link	Event Date	Report Date	Report Date	Date Received	Date Report To FDA	Date Report To Manufacturer	Date Manufacturer Received	Device Date Received 1	Device Date Received 2	Device Date Received 3	Device Expiration Date 1	Device Expiration Date 2	Patient Date Received 1	Patient Date Received 2	Product Class 1	Product Class 2	Product Class 3	Brand Name 1	Brand Name 2	Brand Name 3	Product Code 1	Product Code 2	Product Code 3	Model Number 1	Model Number 2	Model Number 3	Manufacturer 1	Manufacturer 2	Manufacturer 3	Manufacturer Country 1	Manufacturer Country 2	Lot Number 1	Lot Number 2	Catalog Number 1	Catalog Number 2	Device Availability 1	Device Availability 2	Device Availability 3	Device Evaluated By Manufacturer 1	Device Evaluated By Manufacturer 2	Single Use Flag	Reprocessed And Reused Flag	Device Operator 1	Device Operator 2	Device Operator 3	Report Source Code
1	1220648-2026-04181	24466139	https://www.accessdata.fda.gov/scripts/cdrh/cfdocs/cfmaude/detail.cfm?mdrfoi__id=24466139&pc=OZD	11/02/2025			02/27/2026			11/02/2025	02/27/2026					02/27/2026		TEMPORARY NON-ROLLER TYPE LEFT HEART SUPPORT BLOOD PUMP			IMPELLA 5.5 WITH SMARTASSIST S2 SET, US			OZD						ABIOMED, INC. - 1220648			US		2026745774		1000100		No			No		Yes	No	Health Professional			Manufacturer report
2	1220648-2026-04179	24466165	https://www.accessdata.fda.gov/scripts/cdrh/cfdocs/cfmaude/detail.cfm?mdrfoi__id=24466165&pc=OZD	11/01/2025			02/27/2026			11/01/2025	02/27/2026					02/27/2026		TEMPORARY NON-ROLLER TYPE LEFT HEART SUPPORT BLOOD PUMP			IMPELLA 5.5 WITH SMARTASSIST S2 SET, US			OZD			IMPELLA 5.5 WITH SMARTASSIST S2 SET, US			ABIOMED, INC. - 1220648			US		2026738971		000000000001000100		No			No		Yes	No	Health Professional			Manufacturer report
3	1220648-2026-04185	24468666	https://www.accessdata.fda.gov/scripts/cdrh/cfdocs/cfmaude/detail.cfm?mdrfoi__id=24468666&pc=OZD	02/17/2026	02/27/2026		02/27/2026			02/17/2026	02/27/2026							TEMPORARY NON-ROLLER TYPE LEFT HEART SUPPORT BLOOD PUMP			IMPELLA 5.5 WITH SMARTASSIST S2 SET, US			OZD			IMPELLA 5.5 WITH SMARTASSIST S2 SET, US			ABIOMED, INC. - 1220648			US		2026774679		000000000001000100		No			No		Yes	No	Health Professional			Manufacturer report
4	1220648-2026-04190	24468769	https://www.accessdata.fda.gov/scripts/cdrh/cfdocs/cfmaude/detail.cfm?mdrfoi__id=24468769&pc=OZD	02/18/2026	02/27/2026		02/27/2026			02/18/2026	02/27/2026							TEMPORARY NON-ROLLER TYPE LEFT HEART SUPPORT BLOOD PUMP			IMPELLA 5.5 WITH SMARTASSIST S2 SET, US			OZD			IMPELLA 5.5 WITH SMARTASSIST S2 SET, US			ABIOMED, INC. - 1220648			US		2026813005		000000000001000100		No			No		Yes	No	Health Professional			Manufacturer report
5	1220648-2026-04189	24468771	https://www.accessdata.fda.gov/scripts/cdrh/cfdocs/cfmaude/detail.cfm?mdrfoi__id=24468771&pc=OZD	02/17/2026			02/27/2026			02/17/2026	02/27/2026							TEMPORARY NON-ROLLER TYPE LEFT HEART SUPPORT BLOOD PUMP			IMPELLA 5.5 WITH SMARTASSIST S2 SET, US			OZD						ABIOMED, INC. - 1220648			US		2026801120		1000100		No			No		Yes	No	Health Professional			Manufacturer report
6	1220648-2026-04191	24468777	https://www.accessdata.fda.gov/scripts/cdrh/cfdocs/cfmaude/detail.cfm?mdrfoi__id=24468777&pc=OZD	02/17/2026			02/27/2026			02/17/2026	02/27/2026					02/27/2026		TEMPORARY NON-ROLLER TYPE LEFT HEART SUPPORT BLOOD PUMP			OPTICAL, AIC, IMPELLA CONNECT, PKGD, US			OZD						ABIOMED, INC. - 1220648			US		1815943		0042-0040-US		No			No		Yes	No	Health Professional			Manufacturer report
7	1220648-2026-04196	24469063	https://www.accessdata.fda.gov/scripts/cdrh/cfdocs/cfmaude/detail.cfm?mdrfoi__id=24469063&pc=OZD	02/20/2026			02/27/2026			02/20/2026	02/27/2026							TEMPORARY NON-ROLLER TYPE LEFT HEART SUPPORT BLOOD PUMP			OPTICAL, AIC, IMPELLA CONNECT, PKGD, US			OZD						ABIOMED, INC. - 1220648			US		1678954		0042-0040-US		No			No		No	No	Health Professional			Manufacturer report
8	1220648-2026-04197	24469107	https://www.accessdata.fda.gov/scripts/cdrh/cfdocs/cfmaude/detail.cfm?mdrfoi__id=24469107&pc=OZD	02/20/2026			02/27/2026			02/20/2026	02/27/2026					02/27/2026		TEMPORARY NON-ROLLER TYPE LEFT HEART SUPPORT BLOOD PUMP			IMPELLA CONTROLLER, PACKAGED, EU			OZD						ABIOMED, INC. - 1220648			US		1253378		0042-0000-EU		No			No		No	No	Health Professional			Manufacturer report
9	1220648-2026-04201	24469279	https://www.accessdata.fda.gov/scripts/cdrh/cfdocs/cfmaude/detail.cfm?mdrfoi__id=24469279&pc=OZD	02/19/2026			02/27/2026			02/20/2026	02/27/2026							TEMPORARY NON-ROLLER TYPE LEFT HEART SUPPORT BLOOD PUMP			IMPELLA CPSA C9+ SET, OUS			OZD						ABIOMED, INC. - 1220648			US		2026779058		000000000001000851		No			No		Yes	No	Health Professional			Manufacturer report
10	1220648-2026-04202	24469490	https://www.accessdata.fda.gov/scripts/cdrh/cfdocs/cfmaude/detail.cfm?mdrfoi__id=24469490&pc=OZD	02/18/2026			02/27/2026			02/18/2026	02/27/2026							TEMPORARY NON-ROLLER TYPE LEFT HEART SUPPORT BLOOD PUMP			IMPELLA 5.5 WITH SMARTASSIST S2 SET, US			OZD						ABIOMED, INC. - 1220648			US		2026656861		1000100		No			No		Yes	No	Health Professional			Manufacturer report
11	1220648-2026-04205	24469601	https://www.accessdata.fda.gov/scripts/cdrh/cfdocs/cfmaude/detail.cfm?mdrfoi__id=24469601&pc=OZD	02/18/2026			02/27/2026			02/18/2026	02/27/2026							TEMPORARY NON-ROLLER TYPE LEFT HEART SUPPORT BLOOD PUMP			IMPELLA 5.5 WITH SMARTASSIST S2 SET, US			OZD						ABIOMED, INC. - 1220648			US		2027818913		1000100		No			No		Yes	No	Health Professional			Manufacturer report
12	1220648-2026-04208	24469684	https://www.accessdata.fda.gov/scripts/cdrh/cfdocs/cfmaude/detail.cfm?mdrfoi__id=24469684&pc=OZD	02/20/2026			02/27/2026			02/20/2026	02/27/2026							TEMPORARY NON-ROLLER TYPE LEFT HEART SUPPORT BLOOD PUMP			IMPELLA 5.5 WITH SMARTASSIST S2 SET, US			OZD						ABIOMED, INC. - 1220648			US		2026815946		000000000001000100		No			No		Yes	No	Health Professional			Manufacturer report
13	1220648-2026-04207	24469903	https://www.accessdata.fda.gov/scripts/cdrh/cfdocs/cfmaude/detail.cfm?mdrfoi__id=24469903&pc=OZD	02/20/2026	02/27/2026		02/27/2026			02/20/2026	02/27/2026							TEMPORARY NON-ROLLER TYPE LEFT HEART SUPPORT BLOOD PUMP			IMPELLA CPSA C9+ SET, OUS			OZD						ABIOMED, INC. - 1220648			US		2026778434		000000000001000851		No			No		Yes	No	Health Professional			Manufacturer report
14	1220648-2026-04217	24469943	https://www.accessdata.fda.gov/scripts/cdrh/cfdocs/cfmaude/detail.cfm?mdrfoi__id=24469943&pc=OZD	02/18/2026			02/27/2026			02/18/2026	02/27/2026							TEMPORARY NON-ROLLER TYPE LEFT HEART SUPPORT BLOOD PUMP			OPTICAL, AIC, IMPELLA CONNECT, PKGD, US			OZD						ABIOMED, INC. - 1220648			US		1456617		0042-0040-US		No			No		No	No	Health Professional			Manufacturer report
15	1220648-2026-04221	24470078	https://www.accessdata.fda.gov/scripts/cdrh/cfdocs/cfmaude/detail.cfm?mdrfoi__id=24470078&pc=OZD	02/20/2026			02/27/2026			02/20/2026	02/27/2026							TEMPORARY NON-ROLLER TYPE LEFT HEART SUPPORT BLOOD PUMP			IMPELLA 5.5 WITH SMARTASSIST S2 SET, US			OZD						ABIOMED, INC. - 1220648			US		2026727040		000000000001000100		No			No		Yes	No	Health Professional			Manufacturer report
16	1220648-2026-04096	24470155	https://www.accessdata.fda.gov/scripts/cdrh/cfdocs/cfmaude/detail.cfm?mdrfoi__id=24470155&pc=OZD	02/18/2026			02/27/2026			02/18/2026	02/27/2026					02/27/2026		TEMPORARY NON-ROLLER TYPE LEFT HEART SUPPORT BLOOD PUMP			IMPELLA CPSA C9+ SET, OUS			OZD						ABIOMED, INC. - 1220648			US		2026751888		1000851		No			No		Yes	No	Health Professional			Manufacturer report
17	1220648-2026-04223	24470157	https://www.accessdata.fda.gov/scripts/cdrh/cfdocs/cfmaude/detail.cfm?mdrfoi__id=24470157&pc=OZD	02/17/2026			02/27/2026			02/20/2026	02/27/2026							TEMPORARY NON-ROLLER TYPE LEFT HEART SUPPORT BLOOD PUMP			IMPELLA 5.5 WITH SMARTASSIST S2 SET, US			OZD						ABIOMED, INC. - 1220648			US		2026780326		000000000001000100		No			No		Yes	No	Health Professional			Manufacturer report
18	1220648-2026-04225	24470441	https://www.accessdata.fda.gov/scripts/cdrh/cfdocs/cfmaude/detail.cfm?mdrfoi__id=24470441&pc=OZD	02/17/2026			02/27/2026			02/17/2026	02/27/2026							TEMPORARY NON-ROLLER TYPE LEFT HEART SUPPORT BLOOD PUMP			OPTICAL AIC W/IMPELLA CONNECT,PACK'D, EU			OZD						ABIOMED, INC. - 1220648			US		1925275		0042-0040-EU		No			No		No	No	Health Professional			Manufacturer report
19	1220648-2026-04227	24470679	https://www.accessdata.fda.gov/scripts/cdrh/cfdocs/cfmaude/detail.cfm?mdrfoi__id=24470679&pc=OZD	02/18/2026	02/27/2026		02/27/2026			02/18/2026	02/27/2026							TEMPORARY NON-ROLLER TYPE LEFT HEART SUPPORT BLOOD PUMP			IMPELLA CONTROLLER, PACKAGED, US			OZD			IMPELLA CONTROLLER, PACKAGED, US			ABIOMED, INC. - 1220648			US		1177958		0042-0000-US		No			No		No	No	Health Professional			Manufacturer report
20	1220648-2026-04230	24471062	https://www.accessdata.fda.gov/scripts/cdrh/cfdocs/cfmaude/detail.cfm?mdrfoi__id=24471062&pc=OZD	02/20/2026			02/27/2026			02/20/2026	02/27/2026							TEMPORARY NON-ROLLER TYPE LEFT HEART SUPPORT BLOOD PUMP			IMPELLA 5.5 WITH SMARTASSIST S2 SET, US			OZD						ABIOMED, INC. - 1220648			US		2027821527		1000100		No			No		Yes	No	Health Professional			Manufacturer report
21	1220648-2026-04232	24471081	https://www.accessdata.fda.gov/scripts/cdrh/cfdocs/cfmaude/detail.cfm?mdrfoi__id=24471081&pc=OZD	02/19/2026			02/27/2026			02/19/2026	02/27/2026							TEMPORARY NON-ROLLER TYPE LEFT HEART SUPPORT BLOOD PUMP			IMPELLA 5.5 WITH SMARTASSIST S2 SET, US			OZD						ABIOMED, INC. - 1220648			US		2026618478		1000100		No			No		Yes	No	Health Professional			Manufacturer report
22	1220648-2026-04238	24471586	https://www.accessdata.fda.gov/scripts/cdrh/cfdocs/cfmaude/detail.cfm?mdrfoi__id=24471586&pc=OZD	02/21/2026			02/27/2026			02/21/2026	02/27/2026							TEMPORARY NON-ROLLER TYPE LEFT HEART SUPPORT BLOOD PUMP			IMPELLA 5.5 WITH SMARTASSIST S2 SET, US			OZD						ABIOMED, INC. - 1220648			US		2026797267		1000100		No			No		Yes	No	Health Professional			Manufacturer report
23	1220648-2026-04240	24471659	https://www.accessdata.fda.gov/scripts/cdrh/cfdocs/cfmaude/detail.cfm?mdrfoi__id=24471659&pc=OZD	02/21/2026			02/27/2026			02/21/2026	02/27/2026							TEMPORARY NON-ROLLER TYPE LEFT HEART SUPPORT BLOOD PUMP			IMPELLA 5.5 WITH SMARTASSIST S2 SET, US			OZD						ABIOMED, INC. - 1220648			US		2026812430		1000100		No			No		Yes	No	Health Professional			Manufacturer report
24	1220648-2026-04243	24471812	https://www.accessdata.fda.gov/scripts/cdrh/cfdocs/cfmaude/detail.cfm?mdrfoi__id=24471812&pc=OZD	02/21/2026			02/27/2026			02/21/2026	02/27/2026					02/27/2026		TEMPORARY NON-ROLLER TYPE LEFT HEART SUPPORT BLOOD PUMP			IMPELLA 5.5 WITH SMARTASSIST S2 SET, US			OZD						ABIOMED, INC. - 1220648			US		2026801721		1000100		No			No		Yes	No	Health Professional			Manufacturer report
25	1220648-2026-04248	24472146	https://www.accessdata.fda.gov/scripts/cdrh/cfdocs/cfmaude/detail.cfm?mdrfoi__id=24472146&pc=OZD	02/20/2026			02/27/2026			02/21/2026	02/27/2026							TEMPORARY NON-ROLLER TYPE LEFT HEART SUPPORT BLOOD PUMP			IMPELLA 5.5 WITH SMARTASSIST S2 SET, US			OZD						ABIOMED, INC. - 1220648			US		2026757921		1000100		No			No		Yes	No	Health Professional			Manufacturer report
26	1220648-2026-04251	24472303	https://www.accessdata.fda.gov/scripts/cdrh/cfdocs/cfmaude/detail.cfm?mdrfoi__id=24472303&pc=OZD	02/18/2026			02/27/2026			02/18/2026	02/27/2026							TEMPORARY NON-ROLLER TYPE LEFT HEART SUPPORT BLOOD PUMP			OPTICAL, AIC, IMPELLA CONNECT, PKGD, US			OZD						ABIOMED, INC. - 1220648			US		1955422		0042-0040-US		No			No		No	No	Health Professional			Manufacturer report
27	1220648-2026-04252	24472395	https://www.accessdata.fda.gov/scripts/cdrh/cfdocs/cfmaude/detail.cfm?mdrfoi__id=24472395&pc=OZD	10/13/2025			02/27/2026			10/14/2025	02/27/2026					02/27/2026		TEMPORARY NON-ROLLER TYPE LEFT HEART SUPPORT BLOOD PUMP			IMPELLA 5.5 WITH SMARTASSIST S2 SET, US			OZD						ABIOMED, INC. - 1220648			US		2026658602		1000100		No			No		Yes	No	Health Professional			Manufacturer report
28	1220648-2026-04254	24472487	https://www.accessdata.fda.gov/scripts/cdrh/cfdocs/cfmaude/detail.cfm?mdrfoi__id=24472487&pc=OZD	02/17/2026			02/27/2026			02/17/2026	02/27/2026							TEMPORARY NON-ROLLER TYPE LEFT HEART SUPPORT BLOOD PUMP			OPTICAL, AIC, IMPELLA CONNECT, PKGD, US			OZD						ABIOMED, INC. - 1220648			US		1726714		0042-0040-US		No			No		No	No	Health Professional			Manufacturer report
29	1220648-2026-04253	24472842	https://www.accessdata.fda.gov/scripts/cdrh/cfdocs/cfmaude/detail.cfm?mdrfoi__id=24472842&pc=OZD	12/20/2025			02/27/2026			12/20/2025	02/27/2026					02/27/2026		TEMPORARY NON-ROLLER TYPE LEFT HEART SUPPORT BLOOD PUMP			IMPELLA 5.5 WITH SMARTASSIST S2 SET, US			OZD						ABIOMED, INC. - 1220648			US		2026740932		1000100		No			No		Yes	No	Health Professional			Manufacturer report
30	1220648-2026-04257	24473857	https://www.accessdata.fda.gov/scripts/cdrh/cfdocs/cfmaude/detail.cfm?mdrfoi__id=24473857&pc=OZD	12/20/2025			02/27/2026			12/20/2025	02/27/2026							TEMPORARY NON-ROLLER TYPE LEFT HEART SUPPORT BLOOD PUMP			IMPELLA 5.5 WITH SMARTASSIST S2 SET, US			OZD						ABIOMED, INC. - 1220648			US		2026794861		1000100		No			No		Yes	No	Health Professional			Manufacturer report
31	1220648-2026-04258	24473914	https://www.accessdata.fda.gov/scripts/cdrh/cfdocs/cfmaude/detail.cfm?mdrfoi__id=24473914&pc=OZD	02/19/2026			02/27/2026			02/19/2026	02/27/2026							TEMPORARY NON-ROLLER TYPE LEFT HEART SUPPORT BLOOD PUMP			IMPELLA 5.5 WITH SMARTASSIST S2 SET, US			OZD						ABIOMED, INC. - 1220648			US		2026798624		1000100		No			No		Yes	No	Health Professional			Manufacturer report
32	1220648-2026-04255	24473967	https://www.accessdata.fda.gov/scripts/cdrh/cfdocs/cfmaude/detail.cfm?mdrfoi__id=24473967&pc=OZD	02/18/2026			02/27/2026			02/18/2026	02/27/2026							TEMPORARY NON-ROLLER TYPE LEFT HEART SUPPORT BLOOD PUMP			IMPELLA 5.5 WITH SMARTASSIST S2 SET, US			OZD						ABIOMED, INC. - 1220648			US		2026814057		1000100		No			No		Yes	No	Health Professional			Manufacturer report
33	1220648-2026-04259	24474447	https://www.accessdata.fda.gov/scripts/cdrh/cfdocs/cfmaude/detail.cfm?mdrfoi__id=24474447&pc=OZD	12/20/2025			02/27/2026			12/20/2025	02/27/2026							TEMPORARY NON-ROLLER TYPE LEFT HEART SUPPORT BLOOD PUMP			IMPELLA 5.5 WITH SMARTASSIST S2 SET, US			OZD						ABIOMED, INC. - 1220648			US		2026690954		1000100		No			No		Yes	No	Health Professional			Manufacturer report
34	1220648-2026-04262	24474700	https://www.accessdata.fda.gov/scripts/cdrh/cfdocs/cfmaude/detail.cfm?mdrfoi__id=24474700&pc=OZD	02/20/2026			02/27/2026			02/20/2026	02/27/2026							TEMPORARY NON-ROLLER TYPE LEFT HEART SUPPORT BLOOD PUMP			OPTICAL AIC W/IMPELLA CONNECT,PACK'D, EU			OZD						ABIOMED, INC. - 1220648			US		1571192		0042-0040-EU		No			No		No	No	Health Professional			Manufacturer report
35	1220648-2026-04072	24453961	https://www.accessdata.fda.gov/scripts/cdrh/cfdocs/cfmaude/detail.cfm?mdrfoi__id=24453961&pc=OZD	02/12/2026			02/26/2026			02/12/2026	02/26/2026							TEMPORARY NON-ROLLER TYPE LEFT HEART SUPPORT BLOOD PUMP			IMPELLA CONTROLLER, PACKAGED, US			OZD						ABIOMED, INC. - 1220648			US		1116075		0042-0000-US		No			No		No	No	Health Professional			Manufacturer report
36	1220648-2026-04027	24453964	https://www.accessdata.fda.gov/scripts/cdrh/cfdocs/cfmaude/detail.cfm?mdrfoi__id=24453964&pc=OZD	02/17/2026			02/26/2026			02/18/2026	02/26/2026					02/26/2026		TEMPORARY NON-ROLLER TYPE LEFT HEART SUPPORT BLOOD PUMP			IMPELLA CPSA C9+ SET, OUS			OZD						ABIOMED, INC. - 1220648			US		2026806666		1000851		No			No		Yes	No	Health Professional			Manufacturer report
37	1220648-2026-04080	24454274	https://www.accessdata.fda.gov/scripts/cdrh/cfdocs/cfmaude/detail.cfm?mdrfoi__id=24454274&pc=OZD	02/17/2026			02/26/2026			02/17/2026	02/26/2026							TEMPORARY NON-ROLLER TYPE LEFT HEART SUPPORT BLOOD PUMP			IMPELLA CONTROLLER, PACKAGED, US			OZD						ABIOMED, INC. - 1220648			US		1210879		0042-0000-US		No			No		Yes	No	Health Professional			Manufacturer report
38	1220648-2026-04082	24454302	https://www.accessdata.fda.gov/scripts/cdrh/cfdocs/cfmaude/detail.cfm?mdrfoi__id=24454302&pc=OZD	02/12/2026			02/26/2026			02/12/2026	02/26/2026							TEMPORARY NON-ROLLER TYPE LEFT HEART SUPPORT BLOOD PUMP			IMPELLA 5.5 WITH SMARTASSIST S2 SET, US			OZD						ABIOMED, INC. - 1220648			US		2026779310		000000000001000100		No			No		Yes	No	Health Professional			Manufacturer report
39	1220648-2026-04084	24454380	https://www.accessdata.fda.gov/scripts/cdrh/cfdocs/cfmaude/detail.cfm?mdrfoi__id=24454380&pc=OZD	02/19/2026			02/26/2026			02/19/2026	02/26/2026							TEMPORARY NON-ROLLER TYPE LEFT HEART SUPPORT BLOOD PUMP			IMPELLA CONTROLLER, PACKAGED, US			OZD						ABIOMED, INC. - 1220648			US		1109485		0042-0000-US		No			No		No	No	Health Professional			Manufacturer report
40	1220648-2026-04085	24454406	https://www.accessdata.fda.gov/scripts/cdrh/cfdocs/cfmaude/detail.cfm?mdrfoi__id=24454406&pc=OZD	02/19/2026			02/26/2026			02/19/2026	02/26/2026							TEMPORARY NON-ROLLER TYPE LEFT HEART SUPPORT BLOOD PUMP			IMPELLA CONTROLLER, PACKAGED, US			OZD						ABIOMED, INC. - 1220648			US		1087349		0042-0000-US		No			No		No	No	Health Professional			Manufacturer report
41	1220648-2026-04087	24454425	https://www.accessdata.fda.gov/scripts/cdrh/cfdocs/cfmaude/detail.cfm?mdrfoi__id=24454425&pc=OZD	02/19/2026			02/26/2026			02/19/2026	02/26/2026					02/26/2026		TEMPORARY NON-ROLLER TYPE LEFT HEART SUPPORT BLOOD PUMP			IMPELLA 5.5 WITH SMARTASSIST S2 SET, US			OZD						ABIOMED, INC. - 1220648			US		2026802626		000000000001000100		No			No		Yes	No	Health Professional			Manufacturer report
42	1220648-2026-04094	24454689	https://www.accessdata.fda.gov/scripts/cdrh/cfdocs/cfmaude/detail.cfm?mdrfoi__id=24454689&pc=OZD	02/18/2026			02/26/2026			02/18/2026	02/26/2026							TEMPORARY NON-ROLLER TYPE LEFT HEART SUPPORT BLOOD PUMP			IMPELLA CONTROLLER, PACKAGED, US			OZD						ABIOMED, INC. - 1220648			US		1154073		0042-0000-US		No			No		No	No	Health Professional			Manufacturer report
43	1220648-2026-04099	24454807	https://www.accessdata.fda.gov/scripts/cdrh/cfdocs/cfmaude/detail.cfm?mdrfoi__id=24454807&pc=OZD	02/18/2026			02/26/2026			02/18/2026	02/26/2026							TEMPORARY NON-ROLLER TYPE LEFT HEART SUPPORT BLOOD PUMP			IMPELLA 5.5 WITH SMARTASSIST S2 SET, US			OZD						ABIOMED, INC. - 1220648			US		2026812424		000000000001000100		No			No		Yes	No	Health Professional			Manufacturer report
44	1220648-2026-04102	24454877	https://www.accessdata.fda.gov/scripts/cdrh/cfdocs/cfmaude/detail.cfm?mdrfoi__id=24454877&pc=OZD	02/16/2026			02/26/2026			02/17/2026	02/26/2026					02/26/2026		TEMPORARY NON-ROLLER TYPE LEFT HEART SUPPORT BLOOD PUMP			IMPELLA 5.5 WITH SMARTASSIST S2 SET, US			OZD						ABIOMED, INC. - 1220648			US		2026813024		1000100		No			No		Yes	No	Health Professional			Manufacturer report
45	1220648-2026-04107	24455142	https://www.accessdata.fda.gov/scripts/cdrh/cfdocs/cfmaude/detail.cfm?mdrfoi__id=24455142&pc=OZD	02/18/2026			02/26/2026			02/18/2026	02/26/2026					02/26/2026		TEMPORARY NON-ROLLER TYPE LEFT HEART SUPPORT BLOOD PUMP			IMPELLA 5.5 WITH SMARTASSIST S2 SET, US			OZD						ABIOMED, INC. - 1220648			US		2026805577		1000100		No			No		Yes	No	Health Professional			Manufacturer report
46	1220648-2026-04108	24455191	https://www.accessdata.fda.gov/scripts/cdrh/cfdocs/cfmaude/detail.cfm?mdrfoi__id=24455191&pc=OZD	02/16/2026			02/26/2026			02/17/2026	02/26/2026					02/26/2026		TEMPORARY NON-ROLLER TYPE LEFT HEART SUPPORT BLOOD PUMP			IMPELLA 5.5 WITH SMARTASSIST S2 SET, US			OZD						ABIOMED, INC. - 1220648			US		2026743371		1000100		No			No		Yes	No	Health Professional			Manufacturer report
47	1220648-2026-04112	24455390	https://www.accessdata.fda.gov/scripts/cdrh/cfdocs/cfmaude/detail.cfm?mdrfoi__id=24455390&pc=OZD	02/17/2026			02/26/2026			02/17/2026	02/26/2026					02/26/2026		TEMPORARY NON-ROLLER TYPE LEFT HEART SUPPORT BLOOD PUMP			IMPELLA 5.5 WITH SMARTASSIST S2 SET, US			OZD						ABIOMED, INC. - 1220648			US		2026813091		1000100		No			No		Yes	No	Health Professional			Manufacturer report
48	1220648-2026-04113	24455588	https://www.accessdata.fda.gov/scripts/cdrh/cfdocs/cfmaude/detail.cfm?mdrfoi__id=24455588&pc=OZD	08/29/2025			02/26/2026			08/29/2025	02/26/2026					02/26/2026		TEMPORARY NON-ROLLER TYPE LEFT HEART SUPPORT BLOOD PUMP			OPTICAL AIC W/IMPELLA CONNECT,PACK'D, EU			OZD			OPTICAL AIC W/IMPELLA CONNECT,PACK'D, EU			ABIOMED, INC. - 1220648			US		1953067		0042-0040-EU		No			No		No	No	Health Professional			Manufacturer report
49	1220648-2026-04116	24455787	https://www.accessdata.fda.gov/scripts/cdrh/cfdocs/cfmaude/detail.cfm?mdrfoi__id=24455787&pc=OZD	07/28/2025			02/26/2026			07/29/2025	02/26/2026							TEMPORARY NON-ROLLER TYPE LEFT HEART SUPPORT BLOOD PUMP			OPTICAL, AIC, IMPELLA CONNECT, PKGD, US			OZD			OPTICAL, AIC, IMPELLA CONNECT, PKGD, US			ABIOMED, INC. - 1220648			US		1885195		0042-0040-US		Device was returned to manufacturer			No		No	No	Health Professional			Manufacturer report
50	1220648-2026-04117	24455888	https://www.accessdata.fda.gov/scripts/cdrh/cfdocs/cfmaude/detail.cfm?mdrfoi__id=24455888&pc=OZD	08/23/2025			02/26/2026			08/23/2025	02/26/2026					02/26/2026		TEMPORARY NON-ROLLER TYPE LEFT HEART SUPPORT BLOOD PUMP			IMPELLA 5.5 WITH SMARTASSIST S2 SET, US			OZD			IMPELLA 5.5 WITH SMARTASSIST S2 SET, US			ABIOMED, INC. - 1220648			US		2026661774		000000000001000100		No			No		Yes	No	Health Professional			Manufacturer report
51	1220648-2026-04118	24455940	https://www.accessdata.fda.gov/scripts/cdrh/cfdocs/cfmaude/detail.cfm?mdrfoi__id=24455940&pc=OZD	09/20/2025			02/26/2026			09/20/2025	02/26/2026							TEMPORARY NON-ROLLER TYPE LEFT HEART SUPPORT BLOOD PUMP			IMPELLA 5.5 WITH SMARTASSIST S2 SET, US			OZD			IMPELLA 5.5 WITH SMARTASSIST S2 SET, US			ABIOMED, INC. - 1220648			US		2026710513		1000100		No			No		Yes	No				Manufacturer report
52	1220648-2026-04120	24456424	https://www.accessdata.fda.gov/scripts/cdrh/cfdocs/cfmaude/detail.cfm?mdrfoi__id=24456424&pc=OZD	02/19/2026			02/26/2026			02/19/2026	02/26/2026							TEMPORARY NON-ROLLER TYPE LEFT HEART SUPPORT BLOOD PUMP			IMPELLA 5.5 WITH SMARTASSIST S2 SET, US			OZD						ABIOMED, INC. - 1220648			US		2026807949		1000100		No			No		Yes	No	Health Professional			Manufacturer report
53	1220648-2026-04121	24456427	https://www.accessdata.fda.gov/scripts/cdrh/cfdocs/cfmaude/detail.cfm?mdrfoi__id=24456427&pc=OZD	02/18/2026			02/26/2026			02/18/2026	02/26/2026							TEMPORARY NON-ROLLER TYPE LEFT HEART SUPPORT BLOOD PUMP			IMPELLA 5.5 WITH SMARTASSIST S2 SET, US			OZD						ABIOMED, INC. - 1220648			US		2026699501		1000100		No			No		Yes	No	Health Professional			Manufacturer report
54	1220648-2026-04122	24456445	https://www.accessdata.fda.gov/scripts/cdrh/cfdocs/cfmaude/detail.cfm?mdrfoi__id=24456445&pc=OZD	09/24/2025			02/26/2026			09/24/2025	02/26/2026					02/26/2026		TEMPORARY NON-ROLLER TYPE LEFT HEART SUPPORT BLOOD PUMP			IMPELLA 5.5 WITH SMARTASSIST S2 SET, US			OZD			IMPELLA 5.5 WITH SMARTASSIST S2 SET, US			ABIOMED, INC. - 1220648			US		2026717743		1000100		No			No		Yes	No	Health Professional			Manufacturer report
55	1220648-2026-04123	24456694	https://www.accessdata.fda.gov/scripts/cdrh/cfdocs/cfmaude/detail.cfm?mdrfoi__id=24456694&pc=OZD	09/25/2025			02/26/2026			09/25/2025	02/26/2026					02/26/2026		TEMPORARY NON-ROLLER TYPE LEFT HEART SUPPORT BLOOD PUMP			IMPELLA 5.5 WITH SMARTASSIST S2 SET, US			OZD			IMPELLA 5.5 WITH SMARTASSIST S2 SET, US			ABIOMED, INC. - 1220648			US		2026717757		1000100		No			No		Yes	No	Health Professional			Manufacturer report
56	1220648-2026-04124	24456887	https://www.accessdata.fda.gov/scripts/cdrh/cfdocs/cfmaude/detail.cfm?mdrfoi__id=24456887&pc=OZD	09/26/2025			02/26/2026			09/26/2025	02/26/2026							TEMPORARY NON-ROLLER TYPE LEFT HEART SUPPORT BLOOD PUMP			IMPELLA 5.5 WITH SMARTASSIST S2 SET, US			OZD			IMPELLA 5.5 WITH SMARTASSIST S2 SET, US			ABIOMED, INC. - 1220648			US		2026709935		1000100		No			No		Yes	No	Health Professional			Manufacturer report
57	1220648-2026-04125	24456933	https://www.accessdata.fda.gov/scripts/cdrh/cfdocs/cfmaude/detail.cfm?mdrfoi__id=24456933&pc=OZD	02/16/2026			02/26/2026			02/19/2026	02/26/2026							TEMPORARY NON-ROLLER TYPE LEFT HEART SUPPORT BLOOD PUMP			IMPELLA CPSA C9+ SET, OUS			OZD						ABIOMED, INC. - 1220648			US		2026785642		1000851		No			No		Yes	No	Health Professional			Manufacturer report
58	1220648-2026-04077	24457025	https://www.accessdata.fda.gov/scripts/cdrh/cfdocs/cfmaude/detail.cfm?mdrfoi__id=24457025&pc=OZD	02/14/2026			02/26/2026			02/17/2026	02/26/2026							TEMPORARY NON-ROLLER TYPE LEFT HEART SUPPORT BLOOD PUMP			IMPELLA CP SMART ASSIST SET, JP			OZD						ABIOMED, INC. - 1220648			US		2026804712		0048-0024-JP		No			No		Yes	No	Health Professional			Manufacturer report
59	1220648-2026-04127	24457042	https://www.accessdata.fda.gov/scripts/cdrh/cfdocs/cfmaude/detail.cfm?mdrfoi__id=24457042&pc=OZD	03/14/2025			02/26/2026			09/26/2025	02/26/2026							TEMPORARY NON-ROLLER TYPE LEFT HEART SUPPORT BLOOD PUMP			IMPELLA 5.5 WITH SMARTASSIST S2 SET, US			OZD			IMPELLA 5.5 WITH SMARTASSIST S2 SET, US			ABIOMED, INC. - 1220648			US		2025486895		1000100		No			No		Yes	No	Health Professional			Manufacturer report
60	1220648-2026-04128	24457328	https://www.accessdata.fda.gov/scripts/cdrh/cfdocs/cfmaude/detail.cfm?mdrfoi__id=24457328&pc=OZD	09/26/2025			02/26/2026			09/26/2025	02/26/2026							TEMPORARY NON-ROLLER TYPE LEFT HEART SUPPORT BLOOD PUMP			IMPELLA 5.5 WITH SMARTASSIST S2 SET, US			OZD			IMPELLA 5.5 WITH SMARTASSIST S2 SET, US			ABIOMED, INC. - 1220648			US		2026700168		1000100		No			No		Yes	No	Health Professional			Manufacturer report
61	1220648-2026-04129	24457479	https://www.accessdata.fda.gov/scripts/cdrh/cfdocs/cfmaude/detail.cfm?mdrfoi__id=24457479&pc=OZD	09/26/2025			02/26/2026			09/26/2025	02/26/2026					02/26/2026		TEMPORARY NON-ROLLER TYPE LEFT HEART SUPPORT BLOOD PUMP			IMPELLA 5.5 WITH SMARTASSIST S2 SET, US			OZD			IMPELLA 5.5 WITH SMARTASSIST S2 SET, US			ABIOMED, INC. - 1220648			US		2026678493		1000100		No			No		Yes	No	Health Professional			Manufacturer report
62	1220648-2026-04131	24457596	https://www.accessdata.fda.gov/scripts/cdrh/cfdocs/cfmaude/detail.cfm?mdrfoi__id=24457596&pc=OZD	02/21/2026			02/26/2026			02/21/2026	02/26/2026					02/26/2026		TEMPORARY NON-ROLLER TYPE LEFT HEART SUPPORT BLOOD PUMP			IMPELLA 5.5 WITH SMARTASSIST S2 SET, US			OZD						ABIOMED, INC. - 1220648			US		2027816762		1000100		No			No		Yes	No	Health Professional			Manufacturer report
63	1220648-2026-04132	24457611	https://www.accessdata.fda.gov/scripts/cdrh/cfdocs/cfmaude/detail.cfm?mdrfoi__id=24457611&pc=OZD	09/26/2025			02/26/2026			09/26/2025	02/26/2026							TEMPORARY NON-ROLLER TYPE LEFT HEART SUPPORT BLOOD PUMP			IMPELLA 5.5 WITH SMARTASSIST S2 SET, US			OZD			IMPELLA 5.5 WITH SMARTASSIST S2 SET, US			ABIOMED, INC. - 1220648			US		2026703574		1000100		No			No		Yes	No	Health Professional			Manufacturer report
64	1220648-2026-04137	24458170	https://www.accessdata.fda.gov/scripts/cdrh/cfdocs/cfmaude/detail.cfm?mdrfoi__id=24458170&pc=OZD	02/19/2026			02/26/2026			02/19/2026	02/26/2026					02/26/2026		TEMPORARY NON-ROLLER TYPE LEFT HEART SUPPORT BLOOD PUMP			IMPELLA CPSA C9+ SET, OUS			OZD						ABIOMED, INC. - 1220648			US		2026766839		1000851		No			No		Yes	No	Health Professional			Manufacturer report
65	1220648-2026-04079	24459092	https://www.accessdata.fda.gov/scripts/cdrh/cfdocs/cfmaude/detail.cfm?mdrfoi__id=24459092&pc=OZD	02/18/2026			02/26/2026			02/18/2026	02/26/2026							TEMPORARY NON-ROLLER TYPE LEFT HEART SUPPORT BLOOD PUMP			IMPELLA CONTROLLER, PACKAGED, US			OZD						ABIOMED, INC. - 1220648			US		1112882		0042-0000-US		No			No		No	No	Health Professional			Manufacturer report
66	1220648-2026-04138	24459257	https://www.accessdata.fda.gov/scripts/cdrh/cfdocs/cfmaude/detail.cfm?mdrfoi__id=24459257&pc=OZD	09/26/2025			02/26/2026			09/26/2025	02/26/2026							TEMPORARY NON-ROLLER TYPE LEFT HEART SUPPORT BLOOD PUMP			IMPELLA 5.5 WITH SMARTASSIST S2 SET, US			OZD			IMPELLA 5.5 WITH SMARTASSIST S2 SET, US			ABIOMED, INC. - 1220648			US		2026734190		1000100		No			No		Yes	No	Health Professional			Manufacturer report
67	1220648-2026-04139	24459328	https://www.accessdata.fda.gov/scripts/cdrh/cfdocs/cfmaude/detail.cfm?mdrfoi__id=24459328&pc=OZD	02/18/2026			02/26/2026			02/18/2026	02/26/2026							TEMPORARY NON-ROLLER TYPE LEFT HEART SUPPORT BLOOD PUMP			IMPELLA 5.5 WITH SMARTASSIST S2 SET, US			OZD						ABIOMED, INC. - 1220648			US		2026733491		1000100		No			No		Yes	No	Health Professional			Manufacturer report
68	1220648-2026-04140	24459726	https://www.accessdata.fda.gov/scripts/cdrh/cfdocs/cfmaude/detail.cfm?mdrfoi__id=24459726&pc=OZD	02/17/2026			02/26/2026			02/17/2026	02/26/2026					02/26/2026		TEMPORARY NON-ROLLER TYPE LEFT HEART SUPPORT BLOOD PUMP			IMPELLA CONTROLLER, PACKAGED, US			OZD						ABIOMED, INC. - 1220648			US		1075485		0042-0000-US		Device was returned to manufacturer			No		No	No	Health Professional			Manufacturer report
69	1220648-2026-04141	24459941	https://www.accessdata.fda.gov/scripts/cdrh/cfdocs/cfmaude/detail.cfm?mdrfoi__id=24459941&pc=OZD	09/26/2025			02/26/2026			09/26/2025	02/26/2026							TEMPORARY NON-ROLLER TYPE LEFT HEART SUPPORT BLOOD PUMP			IMPELLA 5.5 WITH SMARTASSIST S2 SET, US			OZD			IMPELLA 5.5 WITH SMARTASSIST S2 SET, US			ABIOMED, INC. - 1220648			US		2026653454		1000100		No			No		Yes	No	Health Professional			Manufacturer report
70	1220648-2026-04143	24460643	https://www.accessdata.fda.gov/scripts/cdrh/cfdocs/cfmaude/detail.cfm?mdrfoi__id=24460643&pc=OZD	09/26/2025			02/26/2026			09/26/2025	02/26/2026					02/26/2026		TEMPORARY NON-ROLLER TYPE LEFT HEART SUPPORT BLOOD PUMP			IMPELLA 5.5 WITH SMARTASSIST S2 SET, US			OZD			IMPELLA 5.5 WITH SMARTASSIST S2 SET, US			ABIOMED, INC. - 1220648			US		2026727007		1000100		No			No		Yes	No	Health Professional			Manufacturer report
71	1220648-2026-04144	24460697	https://www.accessdata.fda.gov/scripts/cdrh/cfdocs/cfmaude/detail.cfm?mdrfoi__id=24460697&pc=OZD	02/20/2026	02/26/2026		02/26/2026			02/20/2026	02/26/2026							TEMPORARY NON-ROLLER TYPE LEFT HEART SUPPORT BLOOD PUMP			OPTICAL, AIC, IMPELLA CONNECT, PKGD, US			OZD						ABIOMED, INC.			US		1484655		0042-0040-US		No			No		No	No	Health Professional			Manufacturer report
72	1220648-2026-04147	24460876	https://www.accessdata.fda.gov/scripts/cdrh/cfdocs/cfmaude/detail.cfm?mdrfoi__id=24460876&pc=OZD	09/30/2025			02/26/2026			09/30/2025	02/26/2026							TEMPORARY NON-ROLLER TYPE LEFT HEART SUPPORT BLOOD PUMP			IMPELLA 5.5 WITH SMARTASSIST S2 SET, US			OZD			IMPELLA 5.5 WITH SMARTASSIST S2 SET, US			ABIOMED, INC. - 1220648			US		2026733800		1000100		No			No		Yes	No	Health Professional			Manufacturer report
73	1220648-2026-04148	24460879	https://www.accessdata.fda.gov/scripts/cdrh/cfdocs/cfmaude/detail.cfm?mdrfoi__id=24460879&pc=OZD	02/16/2026	02/26/2026		02/26/2026			02/17/2026	02/26/2026					02/26/2026		TEMPORARY NON-ROLLER TYPE LEFT HEART SUPPORT BLOOD PUMP			IMPELLA CONTROLLER, PACKAGED, EU			OZD			IMPELLA CONTROLLER, PACKAGED, EU			ABIOMED, INC. - 1220648			US		1386344		0042-0000-EU		No			No		No	No	Health Professional			Manufacturer report
74	1220648-2026-04149	24460973	https://www.accessdata.fda.gov/scripts/cdrh/cfdocs/cfmaude/detail.cfm?mdrfoi__id=24460973&pc=OZD	02/17/2026	02/26/2026		02/26/2026			02/17/2026	02/26/2026							TEMPORARY NON-ROLLER TYPE LEFT HEART SUPPORT BLOOD PUMP			IMPELLA 5.5 WITH SMARTASSIST S2 SET, US			OZD			IMPELLA 5.5 WITH SMARTASSIST S2 SET, US			ABIOMED, INC. - 1220648			US		2026795577		000000000001000100		No			No		Yes	No	Health Professional			Manufacturer report
75	1220648-2026-04152	24461076	https://www.accessdata.fda.gov/scripts/cdrh/cfdocs/cfmaude/detail.cfm?mdrfoi__id=24461076&pc=OZD	09/30/2025			02/26/2026			09/30/2025	02/26/2026					02/26/2026		TEMPORARY NON-ROLLER TYPE LEFT HEART SUPPORT BLOOD PUMP			IMPELLA 5.5 WITH SMARTASSIST S2 SET, US			OZD			IMPELLA 5.5 WITH SMARTASSIST S2 SET, US			ABIOMED, INC. - 1220648			US		2026712269		1000100		No			No		Yes	No	Health Professional			Manufacturer report
76	1220648-2026-04153	24461097	https://www.accessdata.fda.gov/scripts/cdrh/cfdocs/cfmaude/detail.cfm?mdrfoi__id=24461097&pc=OZD	10/02/2025			02/26/2026			10/02/2025	02/26/2026							TEMPORARY NON-ROLLER TYPE LEFT HEART SUPPORT BLOOD PUMP			IMPELLA 5.5 WITH SMARTASSIST S2 SET, US			OZD			IMPELLA 5.5 WITH SMARTASSIST S2 SET, US			ABIOMED, INC. - 1220648			US		2025563086		000000000001000100		No			No		Yes	No	Health Professional			Manufacturer report
77	1220648-2026-04155	24461209	https://www.accessdata.fda.gov/scripts/cdrh/cfdocs/cfmaude/detail.cfm?mdrfoi__id=24461209&pc=OZD	02/13/2026			02/26/2026			02/06/2026	02/26/2026					02/26/2026		TEMPORARY NON-ROLLER TYPE LEFT HEART SUPPORT BLOOD PUMP			IMPELLA 5.5 WITH SMARTASSIST S2 SET, US			OZD						ABIOMED, INC. - 1220648			US		2026812362		1000100		No			No		Yes	No	Health Professional			Manufacturer report
78	1220648-2026-04156	24461236	https://www.accessdata.fda.gov/scripts/cdrh/cfdocs/cfmaude/detail.cfm?mdrfoi__id=24461236&pc=OZD	10/01/2025			02/26/2026			10/01/2025	02/26/2026							TEMPORARY NON-ROLLER TYPE LEFT HEART SUPPORT BLOOD PUMP			IMPELLA 5.5 WITH SMARTASSIST S2 SET, US			OZD			IMPELLA 5.5 WITH SMARTASSIST S2 SET, US			ABIOMED, INC. - 1220648			US		2026731184		1000100		No			No		Yes	No	Health Professional			Manufacturer report
79	1220648-2026-04157	24461262	https://www.accessdata.fda.gov/scripts/cdrh/cfdocs/cfmaude/detail.cfm?mdrfoi__id=24461262&pc=OZD	02/21/2026	02/26/2026		02/26/2026			02/21/2026	02/26/2026							TEMPORARY NON-ROLLER TYPE LEFT HEART SUPPORT BLOOD PUMP			IMPELLA 5.5 WITH SMARTASSIST S2 SET, US			OZD						ABIOMED, INC.			US		2026681846		1000100		No			No		Yes	No	Health Professional			Manufacturer report
80	1220648-2026-04158	24461363	https://www.accessdata.fda.gov/scripts/cdrh/cfdocs/cfmaude/detail.cfm?mdrfoi__id=24461363&pc=OZD	02/22/2026	02/26/2026		02/26/2026			02/22/2026	02/26/2026							TEMPORARY NON-ROLLER TYPE LEFT HEART SUPPORT BLOOD PUMP			IMPELLA 5.5 WITH SMARTASSIST S2 SET, US			OZD						ABIOMED, INC.			US		2026814936		1000100		No			No		Yes	No	Health Professional			Manufacturer report
81	1220648-2026-04161	24461616	https://www.accessdata.fda.gov/scripts/cdrh/cfdocs/cfmaude/detail.cfm?mdrfoi__id=24461616&pc=OZD	10/03/2025			02/26/2026			10/03/2025	02/26/2026					02/26/2026		TEMPORARY NON-ROLLER TYPE LEFT HEART SUPPORT BLOOD PUMP			IMPELLA 5.5 WITH SMARTASSIST S2 SET, US			OZD			IMPELLA 5.5 WITH SMARTASSIST S2 SET, US			ABIOMED, INC. - 1220648			US		2026733474		000000000001000100		No			No			No	Health Professional			Manufacturer report
82	1220648-2026-04162	24461632	https://www.accessdata.fda.gov/scripts/cdrh/cfdocs/cfmaude/detail.cfm?mdrfoi__id=24461632&pc=OZD	10/02/2025			02/26/2026			10/02/2025	02/26/2026							TEMPORARY NON-ROLLER TYPE LEFT HEART SUPPORT BLOOD PUMP			IMPELLA 5.5 WITH SMARTASSIST S2 SET, US			OZD			IMPELLA 5.5 WITH SMARTASSIST S2 SET, US			ABIOMED, INC. - 1220648			US		2026704460		1000100		No			No		Yes	No	Health Professional			Manufacturer report
83	1220648-2026-04163	24461890	https://www.accessdata.fda.gov/scripts/cdrh/cfdocs/cfmaude/detail.cfm?mdrfoi__id=24461890&pc=OZD	10/06/2025			02/26/2026			10/06/2025	02/26/2026					02/26/2026		TEMPORARY NON-ROLLER TYPE LEFT HEART SUPPORT BLOOD PUMP			IMPELLA OPTICAL CONTROLLER, PACKAGED, US			OZD			IMPELLA OPTICAL CONTROLLER, PACKAGED, US			ABIOMED, INC. - 1220648			US		1420348		0042-0010-US		Device was returned to manufacturer			No		No	No	Health Professional			Manufacturer report
84	1220648-2026-04164	24462337	https://www.accessdata.fda.gov/scripts/cdrh/cfdocs/cfmaude/detail.cfm?mdrfoi__id=24462337&pc=OZD	12/23/2025			02/26/2026			12/23/2025	02/26/2026							TEMPORARY NON-ROLLER TYPE LEFT HEART SUPPORT BLOOD PUMP			IMPELLA CONTROLLER, PACKAGED, US			OZD			IMPELLA CONTROLLER, PACKAGED, US			ABIOMED, INC. - 1220648			US		1109485		0042-0000-US		No			No		No	No	Health Professional			Manufacturer report
85	1220648-2026-04167	24463004	https://www.accessdata.fda.gov/scripts/cdrh/cfdocs/cfmaude/detail.cfm?mdrfoi__id=24463004&pc=PYX	12/03/2025			02/26/2026			12/03/2025	02/26/2026							TEMPORARY NON-ROLLER TYPE RIGHT HEART SUPPORT BLOOD PUMP			IMPELLA PUMP, RP-IJ, STERILE			PYX			IMPELLA PUMP, RP-IJ, STERILE			ABIOMED, INC. - 1220648			US		1901670		1000186		No			No		Yes	No	Health Professional			Manufacturer report
86	1220648-2026-04170	24463601	https://www.accessdata.fda.gov/scripts/cdrh/cfdocs/cfmaude/detail.cfm?mdrfoi__id=24463601&pc=OZD	02/17/2026	02/26/2026		02/26/2026			02/17/2026	02/26/2026							TEMPORARY NON-ROLLER TYPE LEFT HEART SUPPORT BLOOD PUMP			IMPELLA 5.5 WITH SMARTASSIST S2 SET, US			OZD			IMPELLA 5.5 WITH SMARTASSIST S2 SET, US			ABIOMED, INC. - 1220648			US		2026812479		000000000001000100		No			No		Yes	No	Health Professional			Manufacturer report
87	1220648-2026-04175	24464693	https://www.accessdata.fda.gov/scripts/cdrh/cfdocs/cfmaude/detail.cfm?mdrfoi__id=24464693&pc=OZD	02/17/2026	02/26/2026		02/26/2026			02/17/2026	02/26/2026							TEMPORARY NON-ROLLER TYPE LEFT HEART SUPPORT BLOOD PUMP			IMPELLA 5.5 WITH SMARTASSIST S2 SET, US			OZD			IMPELLA 5.5 WITH SMARTASSIST S2 SET, US			ABIOMED, INC. - 1220648			US		2026798737		000000000001000100		No			No		Yes	No	Health Professional			Manufacturer report
88	1220648-2026-04178	24465010	https://www.accessdata.fda.gov/scripts/cdrh/cfdocs/cfmaude/detail.cfm?mdrfoi__id=24465010&pc=OZD	02/17/2026			02/26/2026			02/17/2026	02/26/2026					02/26/2026		TEMPORARY NON-ROLLER TYPE LEFT HEART SUPPORT BLOOD PUMP			IMPELLA 5.5 WITH SMARTASSIST S2 SET, US			OZD						ABIOMED, INC. - 1220648			US		2026775835		1000100		No			No		Yes	No	Health Professional			Manufacturer report
89	1220648-2026-03968	24441899	https://www.accessdata.fda.gov/scripts/cdrh/cfdocs/cfmaude/detail.cfm?mdrfoi__id=24441899&pc=OZD	01/29/2026			02/25/2026			01/30/2026	02/25/2026					02/25/2026		TEMPORARY NON-ROLLER TYPE LEFT HEART SUPPORT BLOOD PUMP			IMPELLA 5.5 WITH SMARTASSIST S2 SET, EU			OZD						ABIOMED, INC. - 1220648			US		2026808770		000000000001000482		No			No		Yes	No	Health Professional			Manufacturer report
90	1220648-2026-03969	24441906	https://www.accessdata.fda.gov/scripts/cdrh/cfdocs/cfmaude/detail.cfm?mdrfoi__id=24441906&pc=OZD	02/14/2026			02/25/2026			02/14/2026	02/25/2026							TEMPORARY NON-ROLLER TYPE LEFT HEART SUPPORT BLOOD PUMP			IMPELLA CPSA C9+ SET, OUS			OZD						ABIOMED, INC. - 1220648			US		2026807611		000000000001000851		No			No		Yes	No	Health Professional			Manufacturer report
91	1220648-2026-03975	24442058	https://www.accessdata.fda.gov/scripts/cdrh/cfdocs/cfmaude/detail.cfm?mdrfoi__id=24442058&pc=OZD	02/03/2026			02/25/2026			02/03/2026	02/25/2026							TEMPORARY NON-ROLLER TYPE LEFT HEART SUPPORT BLOOD PUMP			IMPELLA 5.5 WITH SMARTASSIST S2 SET, US			OZD						ABIOMED, INC. - 1220648			US		2026776003		000000000001000100		No			No		Yes	No	Health Professional			Manufacturer report
92	1220648-2026-03977	24442131	https://www.accessdata.fda.gov/scripts/cdrh/cfdocs/cfmaude/detail.cfm?mdrfoi__id=24442131&pc=OZD	01/30/2026			02/25/2026			01/30/2026	02/25/2026							TEMPORARY NON-ROLLER TYPE LEFT HEART SUPPORT BLOOD PUMP			IMPELLA CONTROLLER, PACKAGED, US			OZD						ABIOMED, INC. - 1220648			US		1249361		0042-0000-US		No			No		Yes	No	Health Professional			Manufacturer report
93	1220648-2026-03978	24442158	https://www.accessdata.fda.gov/scripts/cdrh/cfdocs/cfmaude/detail.cfm?mdrfoi__id=24442158&pc=OZD	02/16/2026			02/25/2026			02/16/2026	02/25/2026							TEMPORARY NON-ROLLER TYPE LEFT HEART SUPPORT BLOOD PUMP			OPTICAL, AIC, IMPELLA CONNECT, PKGD, US			OZD						ABIOMED, INC. - 1220648			US		1814730		0042-0040-US		No			No		No	No	Health Professional			Manufacturer report
94	1220648-2026-03982	24442256	https://www.accessdata.fda.gov/scripts/cdrh/cfdocs/cfmaude/detail.cfm?mdrfoi__id=24442256&pc=OZD	02/17/2026			02/25/2026			02/17/2026	02/25/2026					02/25/2026		TEMPORARY NON-ROLLER TYPE LEFT HEART SUPPORT BLOOD PUMP			IMPELLA CONTROLLER, PACKAGED, EU			OZD						ABIOMED, INC. - 1220648			US		1126217		0042-0000-EU		No			No		No	No	Health Professional			Manufacturer report
95	1220648-2026-03990	24442453	https://www.accessdata.fda.gov/scripts/cdrh/cfdocs/cfmaude/detail.cfm?mdrfoi__id=24442453&pc=OZD	02/14/2026			02/25/2026			02/15/2026	02/25/2026							TEMPORARY NON-ROLLER TYPE LEFT HEART SUPPORT BLOOD PUMP			IMPELLA 5.5 WITH SMARTASSIST S2 SET, US			OZD						ABIOMED, INC. - 1220648			US		2026803437		000000000001000100		No			No		Yes	No	Health Professional			Manufacturer report
96	1220648-2026-03991	24442507	https://www.accessdata.fda.gov/scripts/cdrh/cfdocs/cfmaude/detail.cfm?mdrfoi__id=24442507&pc=OZD	02/16/2026			02/25/2026			02/16/2026	02/25/2026							TEMPORARY NON-ROLLER TYPE LEFT HEART SUPPORT BLOOD PUMP			OPTICAL, AIC, IMPELLA CONNECT, PKGD, US			OZD						ABIOMED, INC. - 1220648			US		1739661		0042-0040-US		Device was returned to manufacturer			No		Yes	No	Health Professional			Manufacturer report
97	1220648-2026-03999	24443513	https://www.accessdata.fda.gov/scripts/cdrh/cfdocs/cfmaude/detail.cfm?mdrfoi__id=24443513&pc=OZD	02/17/2026			02/25/2026			02/17/2026	02/25/2026							TEMPORARY NON-ROLLER TYPE LEFT HEART SUPPORT BLOOD PUMP			IMPELLA 5.5 WITH SMARTASSIST S2 SET, US			OZD						ABIOMED, INC. - 1220648			US		2026781108		1000100		No			No		Yes	No	Health Professional			Manufacturer report
98	1220648-2026-04000	24443712	https://www.accessdata.fda.gov/scripts/cdrh/cfdocs/cfmaude/detail.cfm?mdrfoi__id=24443712&pc=OZD	10/02/2025			02/25/2026			10/02/2025	02/25/2026							TEMPORARY NON-ROLLER TYPE LEFT HEART SUPPORT BLOOD PUMP			IMPELLA 5.5 WITH SMARTASSIST S2 SET, US			OZD			IMPELLA 5.5 WITH SMARTASSIST S2 SET, US			ABIOMED, INC. - 1220648			US		2026713964		000000000001000100		No			No		Yes	No	Health Professional			Manufacturer report
99	1220648-2026-04002	24444069	https://www.accessdata.fda.gov/scripts/cdrh/cfdocs/cfmaude/detail.cfm?mdrfoi__id=24444069&pc=OZD	12/02/2025			02/25/2026			12/02/2025	02/25/2026							TEMPORARY NON-ROLLER TYPE LEFT HEART SUPPORT BLOOD PUMP			IMPELLA 5.5 WITH SMARTASSIST S2 SET, US			OZD			IMPELLA 5.5 WITH SMARTASSIST S2 SET, US			ABIOMED, INC. - 1220648			US		2026710590		000000000001000100		No			No		Yes	No	Health Professional			Manufacturer report
100	1220648-2026-04005	24444366	https://www.accessdata.fda.gov/scripts/cdrh/cfdocs/cfmaude/detail.cfm?mdrfoi__id=24444366&pc=OZD	10/22/2025			02/25/2026			10/22/2025	02/25/2026					02/25/2026		TEMPORARY NON-ROLLER TYPE LEFT HEART SUPPORT BLOOD PUMP			IMPELLA 5.5 WITH SMARTASSIST S2 SET, US			OZD			IMPELLA 5.5 WITH SMARTASSIST S2 SET, US			ABIOMED, INC. - 1220648			US		2026684341		000000000001000100		No			No		Yes	No	Health Professional			Manufacturer report
101	1220648-2026-04003	24444367	https://www.accessdata.fda.gov/scripts/cdrh/cfdocs/cfmaude/detail.cfm?mdrfoi__id=24444367&pc=OZD	10/22/2025			02/25/2026			10/22/2025	02/25/2026							TEMPORARY NON-ROLLER TYPE LEFT HEART SUPPORT BLOOD PUMP			OPTICAL, AIC, IMPELLA CONNECT, PKGD, US			OZD			OPTICAL, AIC, IMPELLA CONNECT, PKGD, US			ABIOMED, INC. - 1220648			US		1664272		0042-0040-US		Device was returned to manufacturer			No		No	No	Health Professional			Manufacturer report
102	1220648-2026-04006	24444389	https://www.accessdata.fda.gov/scripts/cdrh/cfdocs/cfmaude/detail.cfm?mdrfoi__id=24444389&pc=OZD	02/17/2026			02/25/2026			02/17/2026	02/25/2026					02/25/2026		TEMPORARY NON-ROLLER TYPE LEFT HEART SUPPORT BLOOD PUMP			IMPELLA CONTROLLER, PACKAGED, US			OZD						ABIOMED, INC. - 1220648			US		1175897		0042-0000-US		No			No		No	No	Health Professional			Manufacturer report
103	1220648-2026-04008	24444626	https://www.accessdata.fda.gov/scripts/cdrh/cfdocs/cfmaude/detail.cfm?mdrfoi__id=24444626&pc=OZD	11/20/2025			02/25/2026			11/20/2025	02/25/2026							TEMPORARY NON-ROLLER TYPE LEFT HEART SUPPORT BLOOD PUMP			IMPELLA CONTROLLER, PACKAGED, US			OZD			IMPELLA CONTROLLER, PACKAGED, US			ABIOMED, INC. - 1220648			US				0042-0000-US		No			No		No	No	Health Professional			Manufacturer report
104	1220648-2026-04010	24444643	https://www.accessdata.fda.gov/scripts/cdrh/cfdocs/cfmaude/detail.cfm?mdrfoi__id=24444643&pc=OZD	02/17/2026			02/25/2026			02/17/2026	02/25/2026					02/25/2026		TEMPORARY NON-ROLLER TYPE LEFT HEART SUPPORT BLOOD PUMP			IMPELLA 5.5 WITH SMARTASSIST S2 SET, US			OZD						ABIOMED, INC. - 1220648			US		2026814962		1000100		No			No		Yes	No	Health Professional			Manufacturer report
105	1220648-2026-04012	24444764	https://www.accessdata.fda.gov/scripts/cdrh/cfdocs/cfmaude/detail.cfm?mdrfoi__id=24444764&pc=OZD	01/24/2026			02/25/2026			01/27/2026	02/25/2026					02/25/2026		TEMPORARY NON-ROLLER TYPE LEFT HEART SUPPORT BLOOD PUMP			IMPELLA CONTROLLER, PACKAGED, EU			OZD						ABIOMED, INC. - 1220648			US		1135506		0042-0000-EU		No			No		Yes	No	Health Professional			Manufacturer report
106	1220648-2026-04013	24444775	https://www.accessdata.fda.gov/scripts/cdrh/cfdocs/cfmaude/detail.cfm?mdrfoi__id=24444775&pc=OZD	02/17/2026			02/25/2026			02/17/2026	02/25/2026							TEMPORARY NON-ROLLER TYPE LEFT HEART SUPPORT BLOOD PUMP			IMPELLA 5.5 WITH SMARTASSIST S2 SET, US			OZD						ABIOMED, INC. - 1220648			US		2027816743		1000100		No			No		Yes	No	Health Professional			Manufacturer report
107	1220648-2026-04014	24444822	https://www.accessdata.fda.gov/scripts/cdrh/cfdocs/cfmaude/detail.cfm?mdrfoi__id=24444822&pc=OZD	11/23/2025			02/25/2026			11/23/2025	02/25/2026							TEMPORARY NON-ROLLER TYPE LEFT HEART SUPPORT BLOOD PUMP			IMPELLA 5.5 WITH SMARTASSIST S2 SET, US			OZD			IMPELLA 5.5 WITH SMARTASSIST S2 SET, US			ABIOMED, INC. - 1220648			US		2026741761		000000000001000100		No			No		Yes	No	Health Professional			Manufacturer report
108	1220648-2026-04011	24444827	https://www.accessdata.fda.gov/scripts/cdrh/cfdocs/cfmaude/detail.cfm?mdrfoi__id=24444827&pc=OZD	11/23/2025			02/25/2026			11/23/2025	02/25/2026							TEMPORARY NON-ROLLER TYPE LEFT HEART SUPPORT BLOOD PUMP			IMPELLA CONTROLLER, PACKAGED, US			OZD			IMPELLA CONTROLLER, PACKAGED, US			ABIOMED, INC. - 1220648			US		1083048		0042-0000-US		Device was returned to manufacturer			No		No	No	Health Professional			Manufacturer report
109	1220648-2026-04015	24444893	https://www.accessdata.fda.gov/scripts/cdrh/cfdocs/cfmaude/detail.cfm?mdrfoi__id=24444893&pc=OZD	10/03/2025			02/25/2026			10/03/2025	02/25/2026			02/28/2026		02/25/2026		TEMPORARY NON-ROLLER TYPE LEFT HEART SUPPORT BLOOD PUMP			IMPELLA 5.5 WITH SMARTASSIST S2 SET, US			OZD			IMPELLA 5.5 WITH SMARTASSIST S2 SET, US			ABIOMED, INC. - 1220648			US		2025463870		000000000001000100		No			No		Yes	No	Health Professional			Manufacturer report
110	1220648-2026-04019	24445264	https://www.accessdata.fda.gov/scripts/cdrh/cfdocs/cfmaude/detail.cfm?mdrfoi__id=24445264&pc=OZD	02/14/2026			02/25/2026			02/14/2026	02/25/2026							TEMPORARY NON-ROLLER TYPE LEFT HEART SUPPORT BLOOD PUMP			OPTICAL, AIC, IMPELLA CONNECT, PKGD, US			OZD						ABIOMED, INC. - 1220648			US		1736295		0042-0040-US		No			No		Yes	No	Health Professional			Manufacturer report
111	1220648-2026-04020	24445272	https://www.accessdata.fda.gov/scripts/cdrh/cfdocs/cfmaude/detail.cfm?mdrfoi__id=24445272&pc=OZD	10/04/2025			02/25/2026			10/04/2025	02/25/2026					02/25/2026		TEMPORARY NON-ROLLER TYPE LEFT HEART SUPPORT BLOOD PUMP			IMPELLA 5.5 WITH SMARTASSIST S2 SET, US			OZD			IMPELLA 5.5 WITH SMARTASSIST S2 SET, US			ABIOMED, INC. - 1220648			US		2026653609		000000000001000100		No			No		Yes	No	Health Professional			Manufacturer report
112	1220648-2026-04021	24445408	https://www.accessdata.fda.gov/scripts/cdrh/cfdocs/cfmaude/detail.cfm?mdrfoi__id=24445408&pc=OZD	02/18/2026			02/25/2026			02/18/2026	02/25/2026							TEMPORARY NON-ROLLER TYPE LEFT HEART SUPPORT BLOOD PUMP			IMPELLA 5.5 WITH SMARTASSIST S2 SET, US			OZD						ABIOMED, INC. - 1220648			US		2026737071		1000100		No			No		Yes	No	Health Professional			Manufacturer report
113	1220648-2026-04022	24445443	https://www.accessdata.fda.gov/scripts/cdrh/cfdocs/cfmaude/detail.cfm?mdrfoi__id=24445443&pc=OZD	02/17/2026			02/25/2026			02/17/2026	02/25/2026							TEMPORARY NON-ROLLER TYPE LEFT HEART SUPPORT BLOOD PUMP			IMPELLA 5.5 WITH SMARTASSIST S2 SET, US			OZD						ABIOMED, INC. - 1220648			US		2026815772		1000100		No			No		Yes	No	Health Professional			Manufacturer report
114	1220648-2026-04024	24445528	https://www.accessdata.fda.gov/scripts/cdrh/cfdocs/cfmaude/detail.cfm?mdrfoi__id=24445528&pc=OZD	10/07/2025			02/25/2026			10/07/2025	02/25/2026					02/25/2026		TEMPORARY NON-ROLLER TYPE LEFT HEART SUPPORT BLOOD PUMP			IMPELLA 5.5 WITH SMARTASSIST S2 SET, US			OZD			IMPELLA 5.5 WITH SMARTASSIST S2 SET, US			ABIOMED, INC. - 1220648			US		2026722345		000000000001000100		No			No		Yes	No	Health Professional			Manufacturer report
115	1220648-2026-04026	24445561	https://www.accessdata.fda.gov/scripts/cdrh/cfdocs/cfmaude/detail.cfm?mdrfoi__id=24445561&pc=OZD	02/14/2026			02/25/2026			02/14/2026	02/25/2026							TEMPORARY NON-ROLLER TYPE LEFT HEART SUPPORT BLOOD PUMP			IMPELLA 5.5 WITH SMARTASSIST S2 SET, US			OZD						ABIOMED, INC. - 1220648			US		2026711512		1000100		No			No		Yes	No	Health Professional			Manufacturer report
116	1220648-2026-04029	24445638	https://www.accessdata.fda.gov/scripts/cdrh/cfdocs/cfmaude/detail.cfm?mdrfoi__id=24445638&pc=OZD	02/13/2026			02/25/2026			02/13/2026	02/25/2026					02/25/2026		TEMPORARY NON-ROLLER TYPE LEFT HEART SUPPORT BLOOD PUMP			IMPELLA CPSA C9+ SET, OUS			OZD						ABIOMED, INC. - 1220648			US		2027833728		1000851		No			No		Yes	No	Health Professional			Manufacturer report
117	1220648-2026-04030	24445651	https://www.accessdata.fda.gov/scripts/cdrh/cfdocs/cfmaude/detail.cfm?mdrfoi__id=24445651&pc=OZD	10/03/2025			02/25/2026			10/03/2025	02/25/2026							TEMPORARY NON-ROLLER TYPE LEFT HEART SUPPORT BLOOD PUMP			IMPELLA 5.5 WITH SMARTASSIST S2 SET, US			OZD			IMPELLA 5.5 WITH SMARTASSIST S2 SET, US			ABIOMED, INC. - 1220648			US		2026734927		000000000001000100		No			No		Yes	No	Health Professional			Manufacturer report
118	1220648-2026-04032	24445730	https://www.accessdata.fda.gov/scripts/cdrh/cfdocs/cfmaude/detail.cfm?mdrfoi__id=24445730&pc=OZD	10/02/2025			02/25/2026			10/02/2025	02/25/2026							TEMPORARY NON-ROLLER TYPE LEFT HEART SUPPORT BLOOD PUMP			IMPELLA 5.5 WITH SMARTASSIST S2 SET, US			OZD			IMPELLA 5.5 WITH SMARTASSIST S2 SET, US			ABIOMED, INC. - 1220648			US		2026737493		000000000001000100		No			No		Yes	No	Health Professional			Manufacturer report
119	1220648-2026-04033	24445746	https://www.accessdata.fda.gov/scripts/cdrh/cfdocs/cfmaude/detail.cfm?mdrfoi__id=24445746&pc=OZD	05/22/2024			02/25/2026			12/12/2025	02/25/2026			02/28/2026		02/25/2026		TEMPORARY NON-ROLLER TYPE LEFT HEART SUPPORT BLOOD PUMP			IMPELLA 5.5 WITH SMARTASSIST S2 SET, US			OZD			IMPELLA 5.5 WITH SMARTASSIST S2 SET, US			ABIOMED, INC. - 1220648			US		2025471111		000000000001000100		No			No		Yes	No	Health Professional			Manufacturer report
120	1220648-2026-04034	24445828	https://www.accessdata.fda.gov/scripts/cdrh/cfdocs/cfmaude/detail.cfm?mdrfoi__id=24445828&pc=OZD	12/20/2025			02/25/2026			12/20/2025	02/25/2026					02/25/2026		TEMPORARY NON-ROLLER TYPE LEFT HEART SUPPORT BLOOD PUMP			IMPELLA 5.5 WITH SMARTASSIST S2 SET, US			OZD			IMPELLA 5.5 WITH SMARTASSIST S2 SET, US			ABIOMED, INC. - 1220648			US		2026749029		000000000001000100		No			No		Yes	No	Health Professional			Manufacturer report
121	1220648-2026-04035	24445841	https://www.accessdata.fda.gov/scripts/cdrh/cfdocs/cfmaude/detail.cfm?mdrfoi__id=24445841&pc=OZD	02/16/2026			02/25/2026			02/17/2026	02/25/2026					02/25/2026		TEMPORARY NON-ROLLER TYPE LEFT HEART SUPPORT BLOOD PUMP			IMPELLA 5.5 WITH SMARTASSIST S2 SET, US			OZD						ABIOMED, INC. - 1220648			US		2026804483		1000100		No			No		Yes	No	Health Professional			Manufacturer report
122	1220648-2026-04037	24445981	https://www.accessdata.fda.gov/scripts/cdrh/cfdocs/cfmaude/detail.cfm?mdrfoi__id=24445981&pc=OZD	02/18/2026			02/25/2026			02/18/2026	02/25/2026							TEMPORARY NON-ROLLER TYPE LEFT HEART SUPPORT BLOOD PUMP			IMPELLA 5.5 WITH SMARTASSIST S2 SET, US			OZD						ABIOMED, INC. - 1220648			US		2025561732		1000100		No			No		Yes	No	Health Professional			Manufacturer report
123	1220648-2026-04038	24446019	https://www.accessdata.fda.gov/scripts/cdrh/cfdocs/cfmaude/detail.cfm?mdrfoi__id=24446019&pc=OZD	02/16/2026			02/25/2026			02/17/2026	02/25/2026					02/25/2026		TEMPORARY NON-ROLLER TYPE LEFT HEART SUPPORT BLOOD PUMP			IMPELLA 5.5 WITH SMARTASSIST S2 SET, US			OZD						ABIOMED, INC. - 1220648			US		2026812381		1000100		No			No		Yes	No	Health Professional			Manufacturer report
124	1220648-2026-04041	24446345	https://www.accessdata.fda.gov/scripts/cdrh/cfdocs/cfmaude/detail.cfm?mdrfoi__id=24446345&pc=OZD	10/03/2025			02/25/2026			10/03/2025	02/25/2026							TEMPORARY NON-ROLLER TYPE LEFT HEART SUPPORT BLOOD PUMP			IMPELLA 5.5 WITH SMARTASSIST S2 SET, US			OZD			IMPELLA 5.5 WITH SMARTASSIST S2 SET, US			ABIOMED, INC. - 1220648			US		2026727006		000000000001000100		No			No		Yes	No	Health Professional			Manufacturer report
125	1220648-2026-04042	24446427	https://www.accessdata.fda.gov/scripts/cdrh/cfdocs/cfmaude/detail.cfm?mdrfoi__id=24446427&pc=OZD	10/29/2025			02/25/2026			10/29/2025	02/25/2026							TEMPORARY NON-ROLLER TYPE LEFT HEART SUPPORT BLOOD PUMP			IMPELLA 5.5 WITH SMARTASSIST S2 SET, US			OZD			IMPELLA 5.5 WITH SMARTASSIST S2 SET, US			ABIOMED, INC. - 1220648			US		2026739650		000000000001000100		No			No		Yes	No	Health Professional			Manufacturer report
126	1220648-2026-04043	24446433	https://www.accessdata.fda.gov/scripts/cdrh/cfdocs/cfmaude/detail.cfm?mdrfoi__id=24446433&pc=OZD	12/21/2025			02/25/2026			12/21/2025	02/25/2026					02/25/2026		TEMPORARY NON-ROLLER TYPE LEFT HEART SUPPORT BLOOD PUMP			IMPELLA 5.5 WITH SMARTASSIST S2 SET, US			OZD			IMPELLA 5.5 WITH SMARTASSIST S2 SET, US			ABIOMED, INC. - 1220648			US		2026744007		000000000001000100		No			No		Yes	No	Health Professional			Manufacturer report
127	1220648-2026-04045	24446588	https://www.accessdata.fda.gov/scripts/cdrh/cfdocs/cfmaude/detail.cfm?mdrfoi__id=24446588&pc=OZD	12/20/2025			02/25/2026			12/21/2025	02/25/2026							TEMPORARY NON-ROLLER TYPE LEFT HEART SUPPORT BLOOD PUMP			IMPELLA 5.5 WITH SMARTASSIST S2 SET, US			OZD			IMPELLA 5.5 WITH SMARTASSIST S2 SET, US			ABIOMED, INC. - 1220648			US		2025515137		000000000001000100		No			No		Yes	No	Health Professional			Manufacturer report
128	1220648-2026-04046	24446622	https://www.accessdata.fda.gov/scripts/cdrh/cfdocs/cfmaude/detail.cfm?mdrfoi__id=24446622&pc=OZD	09/25/2025			02/25/2026			09/25/2025	02/25/2026							TEMPORARY NON-ROLLER TYPE LEFT HEART SUPPORT BLOOD PUMP			IMPELLA 5.5 WITH SMARTASSIST S2 SET, US			OZD			IMPELLA 5.5 WITH SMARTASSIST S2 SET, US			ABIOMED, INC. - 1220648			US		2026672080		000000000001000100		No			No		Yes	No	Health Professional			Manufacturer report
129	1220648-2026-04047	24446687	https://www.accessdata.fda.gov/scripts/cdrh/cfdocs/cfmaude/detail.cfm?mdrfoi__id=24446687&pc=OZD	09/26/2025			02/25/2026			09/26/2025	02/25/2026							TEMPORARY NON-ROLLER TYPE LEFT HEART SUPPORT BLOOD PUMP			IMPELLA 5.5 WITH SMARTASSIST S2 SET, US			OZD			IMPELLA 5.5 WITH SMARTASSIST S2 SET, US			ABIOMED, INC. - 1220648			US		2026666888		000000000001000100		No			No		Yes	No	Health Professional			Manufacturer report
130	1220648-2026-04018	24447100	https://www.accessdata.fda.gov/scripts/cdrh/cfdocs/cfmaude/detail.cfm?mdrfoi__id=24447100&pc=OZD	11/11/2025	02/25/2026		02/25/2026			11/11/2025	02/25/2026					02/25/2026		TEMPORARY NON-ROLLER TYPE LEFT HEART SUPPORT BLOOD PUMP			IMPELLA 5.5 WITH SMARTASSIST S2 SET, US			OZD			IMPELLA 5.5 WITH SMARTASSIST S2 SET, US			ABIOMED, INC.			US		2026756831		1000100		No			No		Yes	No	Health Professional			Manufacturer report
131	1220648-2026-04048	24447101	https://www.accessdata.fda.gov/scripts/cdrh/cfdocs/cfmaude/detail.cfm?mdrfoi__id=24447101&pc=OZD	12/21/2025			02/25/2026			12/22/2025	02/25/2026							TEMPORARY NON-ROLLER TYPE LEFT HEART SUPPORT BLOOD PUMP			IMPELLA 5.5 WITH SMARTASSIST S2 SET, EU			OZD			IMPELLA 5.5 WITH SMARTASSIST S2 SET, EU			ABIOMED, INC. - 1220648			US		2026731520		000000000001000482		No			No		Yes	No	Health Professional			Manufacturer report
132	1220648-2026-04049	24448540	https://www.accessdata.fda.gov/scripts/cdrh/cfdocs/cfmaude/detail.cfm?mdrfoi__id=24448540&pc=OZD	02/17/2026	02/25/2026		02/25/2026			02/17/2026	02/25/2026							TEMPORARY NON-ROLLER TYPE LEFT HEART SUPPORT BLOOD PUMP			IMPELLA 5.5 WITH SMARTASSIST S2 SET, US			OZD			IMPELLA 5.5 WITH SMARTASSIST S2 SET, US			ABIOMED, INC. - 1220648			US		2026736338		000000000001000100		No			No		Yes	No	Health Professional			Manufacturer report
133	1220648-2026-04051	24449064	https://www.accessdata.fda.gov/scripts/cdrh/cfdocs/cfmaude/detail.cfm?mdrfoi__id=24449064&pc=OZD	02/16/2026			02/25/2026			02/16/2026	02/25/2026							TEMPORARY NON-ROLLER TYPE LEFT HEART SUPPORT BLOOD PUMP			IMPELLA 5.5 WITH SMARTASSIST S2 SET, US			OZD						ABIOMED, INC. - 1220648			US		2026744117		1000100		No			No		Yes	No	Health Professional			Manufacturer report
134	1220648-2026-04052	24449193	https://www.accessdata.fda.gov/scripts/cdrh/cfdocs/cfmaude/detail.cfm?mdrfoi__id=24449193&pc=OZD	02/16/2026			02/25/2026			02/16/2026	02/25/2026					02/25/2026		TEMPORARY NON-ROLLER TYPE LEFT HEART SUPPORT BLOOD PUMP			IMPELLA CONTROLLER, PACKAGED, US			OZD						ABIOMED, INC. - 1220648			US		1136985		0042-0000-US		No			No		No	No	Health Professional			Manufacturer report
135	1220648-2026-04055	24450015	https://www.accessdata.fda.gov/scripts/cdrh/cfdocs/cfmaude/detail.cfm?mdrfoi__id=24450015&pc=OZD	02/16/2026			02/25/2026			02/16/2026	02/25/2026					02/25/2026		TEMPORARY NON-ROLLER TYPE LEFT HEART SUPPORT BLOOD PUMP			IMPELLA CONTROLLER, PACKAGED, US			OZD						ABIOMED, INC. - 1220648			US		1250417		0042-0000-US		No			No		No	No	Health Professional			Manufacturer report
136	1220648-2026-04056	24450019	https://www.accessdata.fda.gov/scripts/cdrh/cfdocs/cfmaude/detail.cfm?mdrfoi__id=24450019&pc=OZD	12/05/2025			02/25/2026			12/05/2025	02/25/2026							TEMPORARY NON-ROLLER TYPE LEFT HEART SUPPORT BLOOD PUMP			OPTICAL, AIC, IMPELLA CONNECT, PKGD, US			OZD			OPTICAL, AIC, IMPELLA CONNECT, PKGD, US			ABIOMED, INC. - 1220648			US		1972400		0042-0040-US		No			No		No	No	Health Professional			Manufacturer report
137	1220648-2026-04057	24450043	https://www.accessdata.fda.gov/scripts/cdrh/cfdocs/cfmaude/detail.cfm?mdrfoi__id=24450043&pc=OZD	11/22/2025			02/25/2026			11/24/2025	02/25/2026					02/25/2026		TEMPORARY NON-ROLLER TYPE LEFT HEART SUPPORT BLOOD PUMP			IMPELLA 5.5 WITH SMARTASSIST S2 SET, US			OZD						ABIOMED, INC. - 1220648			US		2026765525		000000000001000100		No			No		Yes	No	Health Professional			Manufacturer report
138	1220648-2026-01527	24450057	https://www.accessdata.fda.gov/scripts/cdrh/cfdocs/cfmaude/detail.cfm?mdrfoi__id=24450057&pc=OZD	09/24/2025			02/25/2026			09/24/2025	02/25/2026							TEMPORARY NON-ROLLER TYPE LEFT HEART SUPPORT BLOOD PUMP			OPTICAL, AIC, IMPELLA CONNECT, PKGD, US			OZD			OPTICAL, AIC, IMPELLA CONNECT, PKGD, US			ABIOMED, INC. - 1220648			US		1751872		0042-0040-US		Device was returned to manufacturer			No		No	No	Health Professional			Manufacturer report
139	1220648-2026-04058	24450077	https://www.accessdata.fda.gov/scripts/cdrh/cfdocs/cfmaude/detail.cfm?mdrfoi__id=24450077&pc=OZD	02/15/2026	02/25/2026		02/25/2026			02/17/2026	02/25/2026					02/25/2026		TEMPORARY NON-ROLLER TYPE LEFT HEART SUPPORT BLOOD PUMP			OPTICAL AIC W/IMPELLA CONNECT, PKGD, JP			OZD						ABIOMED, INC. - 1220648			US		1680221		0042-0040-JP		Device was returned to manufacturer			No		No	No	Health Professional			Manufacturer report
140	1220648-2026-03318	24450172	https://www.accessdata.fda.gov/scripts/cdrh/cfdocs/cfmaude/detail.cfm?mdrfoi__id=24450172&pc=OZD	02/07/2026	02/16/2026		02/25/2026			02/07/2026	02/25/2026					02/25/2026		TEMPORARY NON-ROLLER TYPE LEFT HEART SUPPORT BLOOD PUMP			IMPELLA 5.5 WITH SMARTASSIST S2 SET, US			OZD			IMPELLA 5.5 WITH SMARTASSIST S2 SET, US			ABIOMED, INC.			US		2026763813		1000100		No			No		Yes	No	Health Professional			Manufacturer report
141	1220648-2026-04067	24450871	https://www.accessdata.fda.gov/scripts/cdrh/cfdocs/cfmaude/detail.cfm?mdrfoi__id=24450871&pc=OZD	10/30/2025			02/25/2026			10/30/2025	02/25/2026							TEMPORARY NON-ROLLER TYPE LEFT HEART SUPPORT BLOOD PUMP			IMPELLA 5.5 WITH SMARTASSIST S2 SET, US			OZD						ABIOMED, INC. - 1220648			US		2026713401		000000000001000100		No			No		Yes	No	Health Professional			Manufacturer report
142	1220648-2026-03875	24427825	https://www.accessdata.fda.gov/scripts/cdrh/cfdocs/cfmaude/detail.cfm?mdrfoi__id=24427825&pc=OZD	02/14/2026			02/24/2026			02/14/2026	02/24/2026							TEMPORARY NON-ROLLER TYPE LEFT HEART SUPPORT BLOOD PUMP			IMPELLA 5.5 WITH SMARTASSIST S2 SET, US			OZD						ABIOMED, INC. - 1220648			US		2026711512		000000000001000100		No			No		Yes	No	Health Professional			Manufacturer report
143	1220648-2026-03878	24427923	https://www.accessdata.fda.gov/scripts/cdrh/cfdocs/cfmaude/detail.cfm?mdrfoi__id=24427923&pc=OZD	02/16/2026			02/24/2026			02/16/2026	02/24/2026					02/24/2026		TEMPORARY NON-ROLLER TYPE LEFT HEART SUPPORT BLOOD PUMP			IMPELLA 5.5 WITH SMARTASSIST S2 SET, US			OZD						ABIOMED, INC. - 1220648			US		2026798100		1000100		No			No		Yes	No	Health Professional			Manufacturer report
144	1220648-2026-03882	24428103	https://www.accessdata.fda.gov/scripts/cdrh/cfdocs/cfmaude/detail.cfm?mdrfoi__id=24428103&pc=OZD	02/12/2026			02/24/2026			02/12/2026	02/24/2026					02/24/2026		TEMPORARY NON-ROLLER TYPE LEFT HEART SUPPORT BLOOD PUMP			IMPELLA CP SMART ASSIST SET, JP			OZD						ABIOMED, INC. - 1220648			US		2026777399		0048-0024-JP		No			No		Yes	No	Health Professional			Manufacturer report
145	1220648-2026-03890	24428333	https://www.accessdata.fda.gov/scripts/cdrh/cfdocs/cfmaude/detail.cfm?mdrfoi__id=24428333&pc=OZD	02/06/2026			02/24/2026			02/06/2026	02/24/2026							TEMPORARY NON-ROLLER TYPE LEFT HEART SUPPORT BLOOD PUMP			IMPELLA 5.5 WITH SMARTASSIST S2 SET, US			OZD						ABIOMED, INC. - 1220648			US		2026801065		000000000001000100		No			No		Yes	No	Health Professional			Manufacturer report
146	1220648-2026-03893	24428365	https://www.accessdata.fda.gov/scripts/cdrh/cfdocs/cfmaude/detail.cfm?mdrfoi__id=24428365&pc=OZD	02/16/2026			02/24/2026			02/16/2026	02/24/2026					02/24/2026		TEMPORARY NON-ROLLER TYPE LEFT HEART SUPPORT BLOOD PUMP			IMPELLA 5.5 WITH SMARTASSIST S2 SET, US			OZD						ABIOMED, INC. - 1220648			US		2026806226		1000100		No			No		Yes	No	Health Professional			Manufacturer report
147	1220648-2026-03892	24428366	https://www.accessdata.fda.gov/scripts/cdrh/cfdocs/cfmaude/detail.cfm?mdrfoi__id=24428366&pc=OZD	02/17/2026			02/24/2026			02/17/2026	02/24/2026							TEMPORARY NON-ROLLER TYPE LEFT HEART SUPPORT BLOOD PUMP			IMPELLA CP SMART ASSIST SET, EU			OZD						ABIOMED, INC. - 1220648			US		2025568322		0048-0014		No			No		Yes	No	Health Professional			Manufacturer report
148	1220648-2026-03898	24428474	https://www.accessdata.fda.gov/scripts/cdrh/cfdocs/cfmaude/detail.cfm?mdrfoi__id=24428474&pc=OZD	02/15/2026			02/24/2026			02/15/2026	02/24/2026							TEMPORARY NON-ROLLER TYPE LEFT HEART SUPPORT BLOOD PUMP			IMPELLA 5.5 WITH SMARTASSIST S2 SET, US			OZD						ABIOMED, INC. - 1220648			US		2026797919		000000000001000100		No			No		Yes	No	Health Professional			Manufacturer report
149	1220648-2026-03907	24430164	https://www.accessdata.fda.gov/scripts/cdrh/cfdocs/cfmaude/detail.cfm?mdrfoi__id=24430164&pc=OZD	02/13/2026			02/24/2026			02/15/2026	02/24/2026					02/24/2026		TEMPORARY NON-ROLLER TYPE LEFT HEART SUPPORT BLOOD PUMP			IMPELLA CP SMART ASSIST SET, JP			OZD						ABIOMED, INC. - 1220648			US		2026794126		0048-0024-JP		No			No		Yes	No	Health Professional			Manufacturer report
150	1220648-2026-03908	24430187	https://www.accessdata.fda.gov/scripts/cdrh/cfdocs/cfmaude/detail.cfm?mdrfoi__id=24430187&pc=OZD	09/26/2025			02/24/2026			09/26/2025	02/24/2026					02/24/2026		TEMPORARY NON-ROLLER TYPE LEFT HEART SUPPORT BLOOD PUMP			IMPELLA 5.5 WITH SMARTASSIST S2 SET, US			OZD			IMPELLA 5.5 WITH SMARTASSIST S2 SET, US			ABIOMED, INC. - 1220648			US		2026693762		000000000001000100		No			No		Yes	No	Health Professional			Manufacturer report
151	1220648-2026-03909	24430205	https://www.accessdata.fda.gov/scripts/cdrh/cfdocs/cfmaude/detail.cfm?mdrfoi__id=24430205&pc=OZD	02/18/2026			02/24/2026			02/18/2026	02/24/2026							TEMPORARY NON-ROLLER TYPE LEFT HEART SUPPORT BLOOD PUMP			IMPELLA 5.5 WITH SMARTASSIST S2 SET, US			OZD						ABIOMED, INC. - 1220648			US		2026814960		1000100		No			No		Yes	No	Health Professional			Manufacturer report
152	1220648-2026-03913	24430524	https://www.accessdata.fda.gov/scripts/cdrh/cfdocs/cfmaude/detail.cfm?mdrfoi__id=24430524&pc=OZD	09/26/2025			02/24/2026			09/26/2025	02/24/2026					02/24/2026		TEMPORARY NON-ROLLER TYPE LEFT HEART SUPPORT BLOOD PUMP			IMPELLA CONTROLLER, PACKAGED, US			OZD			IMPELLA CONTROLLER, PACKAGED, US			ABIOMED, INC. - 1220648			US		1172893		0042-0000-US		No			No		Yes	No	Health Professional			Manufacturer report
153	1220648-2026-03914	24430736	https://www.accessdata.fda.gov/scripts/cdrh/cfdocs/cfmaude/detail.cfm?mdrfoi__id=24430736&pc=OZD	10/02/2025			02/24/2026			10/02/2025	02/24/2026					02/24/2026		TEMPORARY NON-ROLLER TYPE LEFT HEART SUPPORT BLOOD PUMP			IMPELLA CONTROLLER, PACKAGED, US			OZD			IMPELLA CONTROLLER, PACKAGED, US			ABIOMED, INC. - 1220648			US		1173720		0042-0000-US		Device was returned to manufacturer			No		No	No	Health Professional			Manufacturer report
154	1220648-2026-03918	24430897	https://www.accessdata.fda.gov/scripts/cdrh/cfdocs/cfmaude/detail.cfm?mdrfoi__id=24430897&pc=OZD	02/13/2026			02/24/2026			02/16/2026	02/24/2026							TEMPORARY NON-ROLLER TYPE LEFT HEART SUPPORT BLOOD PUMP			IMPELLA 5.5 WITH SMARTASSIST S2 SET, EU			OZD						ABIOMED, INC. - 1220648			US		2026771014		1000482		No			No		Yes	No	Health Professional			Manufacturer report
155	1220648-2026-03919	24430937	https://www.accessdata.fda.gov/scripts/cdrh/cfdocs/cfmaude/detail.cfm?mdrfoi__id=24430937&pc=OZD	10/03/2025			02/24/2026			10/03/2025	02/24/2026					02/24/2026		TEMPORARY NON-ROLLER TYPE LEFT HEART SUPPORT BLOOD PUMP			IMPELLA 5.5 WITH SMARTASSIST S2 SET, US			OZD			IMPELLA 5.5 WITH SMARTASSIST S2 SET, US			ABIOMED, INC. - 1220648			US		2026721277		000000000001000100		No			No		Yes	No	Health Professional			Manufacturer report
156	1220648-2026-03920	24431012	https://www.accessdata.fda.gov/scripts/cdrh/cfdocs/cfmaude/detail.cfm?mdrfoi__id=24431012&pc=OZD	02/16/2026			02/24/2026			02/16/2026	02/24/2026							TEMPORARY NON-ROLLER TYPE LEFT HEART SUPPORT BLOOD PUMP			IMPELLA 5.5 WITH SMARTASSIST S2 SET, US			OZD						ABIOMED, INC. - 1220648			US		2026798750		1000100		No			No		Yes	No	Health Professional			Manufacturer report
157	1220648-2026-03922	24431181	https://www.accessdata.fda.gov/scripts/cdrh/cfdocs/cfmaude/detail.cfm?mdrfoi__id=24431181&pc=OZD	10/24/2025			02/24/2026			10/24/2025	02/24/2026							TEMPORARY NON-ROLLER TYPE LEFT HEART SUPPORT BLOOD PUMP			OPTICAL, AIC, IMPELLA CONNECT, PKGD, US			OZD			OPTICAL, AIC, IMPELLA CONNECT, PKGD, US			ABIOMED, INC. - 1220648			US		1778242		0042-0040-US		Device was returned to manufacturer			No		No	No	Health Professional			Manufacturer report
158	1220648-2026-03923	24431207	https://www.accessdata.fda.gov/scripts/cdrh/cfdocs/cfmaude/detail.cfm?mdrfoi__id=24431207&pc=OZD	10/24/2025			02/24/2026			10/24/2025	02/24/2026					02/24/2026		TEMPORARY NON-ROLLER TYPE LEFT HEART SUPPORT BLOOD PUMP			IMPELLA 5.5 WITH SMARTASSIST S2 SET, US			OZD			IMPELLA 5.5 WITH SMARTASSIST S2 SET, US			ABIOMED, INC. - 1220648			US		2026741783		000000000001000100		No			No		Yes	No	Health Professional			Manufacturer report
159	1220648-2026-03926	24431406	https://www.accessdata.fda.gov/scripts/cdrh/cfdocs/cfmaude/detail.cfm?mdrfoi__id=24431406&pc=OZD	02/15/2026			02/24/2026			02/18/2026	02/24/2026							TEMPORARY NON-ROLLER TYPE LEFT HEART SUPPORT BLOOD PUMP			IMPELLA CONTROLLER, PACKAGED, JP			OZD						ABIOMED, INC.			US		1420740		0042-0000-JP		Device was returned to manufacturer			No		No	No	Health Professional			Manufacturer report
160	1220648-2026-03927	24431455	https://www.accessdata.fda.gov/scripts/cdrh/cfdocs/cfmaude/detail.cfm?mdrfoi__id=24431455&pc=OZD	11/16/2025			02/24/2026			11/16/2025	02/24/2026							TEMPORARY NON-ROLLER TYPE LEFT HEART SUPPORT BLOOD PUMP			IMPELLA 5.5 WITH SMARTASSIST S2 SET, US			OZD			IMPELLA 5.5 WITH SMARTASSIST S2 SET, US			ABIOMED, INC. - 1220648			US		2026748987		000000000001000100		No			No		Yes	No	Health Professional			Manufacturer report
161	1220648-2026-03928	24431471	https://www.accessdata.fda.gov/scripts/cdrh/cfdocs/cfmaude/detail.cfm?mdrfoi__id=24431471&pc=OZD	11/16/2025			02/24/2026			11/16/2025	02/24/2026							TEMPORARY NON-ROLLER TYPE LEFT HEART SUPPORT BLOOD PUMP			OPTICAL, AIC, IMPELLA CONNECT, PKGD, US			OZD			OPTICAL, AIC, IMPELLA CONNECT, PKGD, US			ABIOMED, INC. - 1220648			US		1431034		0042-0040-US		Device was returned to manufacturer			No		No	No	Health Professional			Manufacturer report
162	1220648-2026-03931	24431709	https://www.accessdata.fda.gov/scripts/cdrh/cfdocs/cfmaude/detail.cfm?mdrfoi__id=24431709&pc=OZD	02/19/2026			02/24/2026			02/19/2026	02/24/2026					02/24/2026		TEMPORARY NON-ROLLER TYPE LEFT HEART SUPPORT BLOOD PUMP			IMPELLA 5.5 WITH SMARTASSIST S2 SET, US			OZD						ABIOMED, INC. - 1220648			US		2026796215		1000100		No			No		Yes	No	Health Professional			Manufacturer report
163	1220648-2026-03932	24431815	https://www.accessdata.fda.gov/scripts/cdrh/cfdocs/cfmaude/detail.cfm?mdrfoi__id=24431815&pc=OZD	01/28/2026			02/24/2026			01/28/2026	02/24/2026							TEMPORARY NON-ROLLER TYPE LEFT HEART SUPPORT BLOOD PUMP			IMPELLA 5.5 WITH SMARTASSIST S2 SET, EU			OZD						ABIOMED, INC. - 1220648			US		2026807241		1000482		No			No		Yes	No	Health Professional			Manufacturer report
164	1220648-2026-03840	24432287	https://www.accessdata.fda.gov/scripts/cdrh/cfdocs/cfmaude/detail.cfm?mdrfoi__id=24432287&pc=OZD	02/16/2026			02/24/2026			02/16/2026	02/24/2026					02/24/2026		TEMPORARY NON-ROLLER TYPE LEFT HEART SUPPORT BLOOD PUMP			IMPELLA CONTROLLER, PACKAGED, US			OZD						ABIOMED, INC. - 1220648			US		1126568		0042-0000-US		Device was returned to manufacturer			No		No	No	Health Professional			Manufacturer report
165	1220648-2026-03933	24432671	https://www.accessdata.fda.gov/scripts/cdrh/cfdocs/cfmaude/detail.cfm?mdrfoi__id=24432671&pc=OZD	02/16/2026			02/24/2026			02/16/2026	02/24/2026							TEMPORARY NON-ROLLER TYPE LEFT HEART SUPPORT BLOOD PUMP			IMPELLA 5.5 WITH SMARTASSIST S2 SET, US			OZD						ABIOMED, INC. - 1220648			US		2026737008		1000100		No			No		Yes	No	Health Professional			Manufacturer report
166	1220648-2026-03934	24433063	https://www.accessdata.fda.gov/scripts/cdrh/cfdocs/cfmaude/detail.cfm?mdrfoi__id=24433063&pc=OZD	02/16/2026			02/24/2026			02/16/2026	02/24/2026					02/24/2026		TEMPORARY NON-ROLLER TYPE LEFT HEART SUPPORT BLOOD PUMP			IMPELLA 5.5 WITH SMARTASSIST S2 SET, US			OZD						ABIOMED, INC. - 1220648			US		2026806121		1000100		No			No		Yes	No	Health Professional			Manufacturer report
167	1220648-2026-03941	24433400	https://www.accessdata.fda.gov/scripts/cdrh/cfdocs/cfmaude/detail.cfm?mdrfoi__id=24433400&pc=OZD	02/16/2026			02/24/2026			02/16/2026	02/24/2026							TEMPORARY NON-ROLLER TYPE LEFT HEART SUPPORT BLOOD PUMP			OPTICAL, AIC, IMPELLA CONNECT, PKGD, US			OZD						ABIOMED, INC. - 1220648			US		2019074		0042-0040-US		No			No		No	No	Health Professional			Manufacturer report
168	1220648-2026-03943	24433549	https://www.accessdata.fda.gov/scripts/cdrh/cfdocs/cfmaude/detail.cfm?mdrfoi__id=24433549&pc=OZD	02/14/2026			02/24/2026			02/14/2026	02/24/2026					02/24/2026		TEMPORARY NON-ROLLER TYPE LEFT HEART SUPPORT BLOOD PUMP			IMPELLA 5.5 WITH SMARTASSIST S2 SET, US			OZD						ABIOMED, INC. - 1220648			US		2026812452		1000100		No			No		Yes	No	Health Professional			Manufacturer report
169	1220648-2026-03944	24433596	https://www.accessdata.fda.gov/scripts/cdrh/cfdocs/cfmaude/detail.cfm?mdrfoi__id=24433596&pc=OZD	11/17/2025			02/24/2026			11/16/2025	02/24/2026					02/24/2026		TEMPORARY NON-ROLLER TYPE LEFT HEART SUPPORT BLOOD PUMP			OPTICAL AIC W/IMPELLA CONNECT,PACK'D, EU			OZD			OPTICAL AIC W/IMPELLA CONNECT,PACK'D, EU			ABIOMED, INC. - 1220648			US		1691229		0042-0040-EU		No			No		No	No	Health Professional			Manufacturer report
170	1220648-2026-03946	24433696	https://www.accessdata.fda.gov/scripts/cdrh/cfdocs/cfmaude/detail.cfm?mdrfoi__id=24433696&pc=OZD	02/18/2026			02/24/2026			02/18/2026	02/24/2026							TEMPORARY NON-ROLLER TYPE LEFT HEART SUPPORT BLOOD PUMP			IMPELLA 5.5 WITH SMARTASSIST S2 SET, US			OZD						ABIOMED, INC. - 1220648			US		2026802451		1000100		No			No		Yes	No	Health Professional			Manufacturer report
171	1220648-2026-03947	24433769	https://www.accessdata.fda.gov/scripts/cdrh/cfdocs/cfmaude/detail.cfm?mdrfoi__id=24433769&pc=OZD	12/02/2025			02/24/2026			12/02/2025	02/24/2026							TEMPORARY NON-ROLLER TYPE LEFT HEART SUPPORT BLOOD PUMP			IMPELLA 5.5 WITH SMARTASSIST S2 SET, US			OZD			IMPELLA 5.5 WITH SMARTASSIST S2 SET, US			ABIOMED, INC. - 1220648			US		2026733792		000000000001000100		No			No		Yes	No	Health Professional			Manufacturer report
172	1220648-2026-03948	24433809	https://www.accessdata.fda.gov/scripts/cdrh/cfdocs/cfmaude/detail.cfm?mdrfoi__id=24433809&pc=OZD	12/22/2025			02/24/2026			12/22/2025	02/24/2026							TEMPORARY NON-ROLLER TYPE LEFT HEART SUPPORT BLOOD PUMP			IMPELLA 5.5 WITH SMARTASSIST S2 SET, US			OZD			IMPELLA 5.5 WITH SMARTASSIST S2 SET, US			ABIOMED, INC. - 1220648			US		2026773628		000000000001000100		No			No		Yes	No	Health Professional			Manufacturer report
173	1220648-2026-03951	24434185	https://www.accessdata.fda.gov/scripts/cdrh/cfdocs/cfmaude/detail.cfm?mdrfoi__id=24434185&pc=OZD	11/17/2025			02/24/2026			11/17/2025	02/24/2026					02/24/2026		TEMPORARY NON-ROLLER TYPE LEFT HEART SUPPORT BLOOD PUMP			OPTICAL, AIC, IMPELLA CONNECT, PKGD, US			OZD			OPTICAL, AIC, IMPELLA CONNECT, PKGD, US			ABIOMED, INC. - 1220648			US		1723047		0042-0040-US		Device was returned to manufacturer			No		No	No	Health Professional			Manufacturer report
174	1220648-2026-03950	24434201	https://www.accessdata.fda.gov/scripts/cdrh/cfdocs/cfmaude/detail.cfm?mdrfoi__id=24434201&pc=OZD	11/17/2025			02/24/2026			11/17/2025	02/24/2026							TEMPORARY NON-ROLLER TYPE LEFT HEART SUPPORT BLOOD PUMP			IMPELLA 5.5 WITH SMARTASSIST S2 SET, US			OZD			IMPELLA 5.5 WITH SMARTASSIST S2 SET, US			ABIOMED, INC. - 1220648			US		2026736476		000000000001000100		No			No		Yes	No	Health Professional			Manufacturer report
175	1220648-2026-03952	24434266	https://www.accessdata.fda.gov/scripts/cdrh/cfdocs/cfmaude/detail.cfm?mdrfoi__id=24434266&pc=OZD	11/22/2025			02/24/2026			11/22/2025	02/24/2026					02/24/2026		TEMPORARY NON-ROLLER TYPE LEFT HEART SUPPORT BLOOD PUMP			IMPELLA 5.5 WITH SMARTASSIST S2 SET, US			OZD			IMPELLA 5.5 WITH SMARTASSIST S2 SET, US			ABIOMED, INC. - 1220648			US		2026735820		000000000001000100		No			No		Yes	No	Health Professional			Manufacturer report
176	1220648-2026-03960	24438421	https://www.accessdata.fda.gov/scripts/cdrh/cfdocs/cfmaude/detail.cfm?mdrfoi__id=24438421&pc=OZD	02/09/2026	02/24/2026		02/24/2026			02/10/2026	02/24/2026							TEMPORARY NON-ROLLER TYPE LEFT HEART SUPPORT BLOOD PUMP			IMPELLA CPSA C9+ SET, OUS			OZD			IMPELLA CPSA C9+ SET, OUS			ABIOMED, INC.			US		2026777167		1000851		No			No		Yes	No	Health Professional			Manufacturer report
177	1220648-2026-03741	24412927	https://www.accessdata.fda.gov/scripts/cdrh/cfdocs/cfmaude/detail.cfm?mdrfoi__id=24412927&pc=OZD	02/10/2026			02/23/2026			02/10/2026	02/23/2026							TEMPORARY NON-ROLLER TYPE LEFT HEART SUPPORT BLOOD PUMP			IMPELLA 5.5 WITH SMARTASSIST S2 SET, US			OZD						ABIOMED, INC. - 1220648			US		2026746216		1000100		No			No		Yes	No	Health Professional			Manufacturer report
178	1220648-2026-03745	24413029	https://www.accessdata.fda.gov/scripts/cdrh/cfdocs/cfmaude/detail.cfm?mdrfoi__id=24413029&pc=OZD	02/15/2026			02/23/2026			02/15/2026	02/23/2026							TEMPORARY NON-ROLLER TYPE LEFT HEART SUPPORT BLOOD PUMP			IMPELLA 5.5 WITH SMARTASSIST S2 SET, US			OZD						ABIOMED, INC. - 1220648			US		2026677295		1000100		No			No		Yes	No	Health Professional			Manufacturer report
179	1220648-2026-03750	24413193	https://www.accessdata.fda.gov/scripts/cdrh/cfdocs/cfmaude/detail.cfm?mdrfoi__id=24413193&pc=OZD	02/13/2026			02/23/2026			02/13/2026	02/23/2026							TEMPORARY NON-ROLLER TYPE LEFT HEART SUPPORT BLOOD PUMP			IMPELLA 5.5 WITH SMARTASSIST S2 SET, US			OZD						ABIOMED, INC. - 1220648			US		2026806170		1000100		No			No		Yes	No	Health Professional			Manufacturer report
180	1220648-2026-03751	24413291	https://www.accessdata.fda.gov/scripts/cdrh/cfdocs/cfmaude/detail.cfm?mdrfoi__id=24413291&pc=OZD	02/10/2026			02/23/2026			02/13/2026	02/23/2026					02/23/2026		TEMPORARY NON-ROLLER TYPE LEFT HEART SUPPORT BLOOD PUMP			IMPELLA CP SMART ASSIST SET, JP			OZD						ABIOMED, INC. - 1220648			US		2026713244		0048-0024-JP		No			No		Yes	No	Health Professional			Manufacturer report
181	1220648-2026-03752	24413313	https://www.accessdata.fda.gov/scripts/cdrh/cfdocs/cfmaude/detail.cfm?mdrfoi__id=24413313&pc=OZD	02/12/2026			02/23/2026			02/12/2026	02/23/2026							TEMPORARY NON-ROLLER TYPE LEFT HEART SUPPORT BLOOD PUMP			IMPELLA 5.5 WITH SMARTASSIST S2 SET, US			OZD						ABIOMED, INC. - 1220648			US		2026809827		1000100		No			No		Yes	No	Health Professional			Manufacturer report
182	1220648-2026-03754	24413423	https://www.accessdata.fda.gov/scripts/cdrh/cfdocs/cfmaude/detail.cfm?mdrfoi__id=24413423&pc=OZD	02/13/2026			02/23/2026			02/13/2026	02/23/2026					02/23/2026		TEMPORARY NON-ROLLER TYPE LEFT HEART SUPPORT BLOOD PUMP			OPTICAL, AIC, IMPELLA CONNECT, PKGD, US			OZD						ABIOMED, INC. - 1220648			US		1684985		0042-0040-US		Device was returned to manufacturer			No		No	No	Health Professional			Manufacturer report
183	1220648-2026-03760	24413639	https://www.accessdata.fda.gov/scripts/cdrh/cfdocs/cfmaude/detail.cfm?mdrfoi__id=24413639&pc=OZD	02/08/2026			02/23/2026			02/13/2026	02/23/2026					02/23/2026		TEMPORARY NON-ROLLER TYPE LEFT HEART SUPPORT BLOOD PUMP			IMPELLA CP SMART ASSIST SET, JP			OZD						ABIOMED, INC. - 1220648			US		2026801529		0048-0024-JP		No			No		Yes	No	Health Professional			Manufacturer report
184	1220648-2026-03762	24413655	https://www.accessdata.fda.gov/scripts/cdrh/cfdocs/cfmaude/detail.cfm?mdrfoi__id=24413655&pc=OZD	09/27/2025			02/23/2026			09/27/2025	02/23/2026					02/23/2026		TEMPORARY NON-ROLLER TYPE LEFT HEART SUPPORT BLOOD PUMP			IMPELLA CONTROLLER, PACKAGED, US			OZD			IMPELLA CONTROLLER, PACKAGED, US			ABIOMED, INC. - 1220648			US		1281602		0042-0000-US		No			No		Yes	No	Health Professional			Manufacturer report
185	1220648-2026-03764	24413675	https://www.accessdata.fda.gov/scripts/cdrh/cfdocs/cfmaude/detail.cfm?mdrfoi__id=24413675&pc=OZD	02/13/2026			02/23/2026			02/13/2026	02/23/2026							TEMPORARY NON-ROLLER TYPE LEFT HEART SUPPORT BLOOD PUMP			IMPELLA CONTROLLER, PACKAGED, US			OZD						ABIOMED, INC. - 1220648			US		1245092		0042-0000-US		No			No		No	No	Health Professional			Manufacturer report
186	1220648-2026-03766	24413709	https://www.accessdata.fda.gov/scripts/cdrh/cfdocs/cfmaude/detail.cfm?mdrfoi__id=24413709&pc=OZD	02/11/2026			02/23/2026			02/12/2026	02/23/2026					02/23/2026		TEMPORARY NON-ROLLER TYPE LEFT HEART SUPPORT BLOOD PUMP			IMPELLA 5.5 WITH SMARTASSIST S2 SET, US			OZD						ABIOMED, INC. - 1220648			US		2026700716		000000000001000100		No			No		Yes	No	Health Professional			Manufacturer report
187	1220648-2026-03768	24413724	https://www.accessdata.fda.gov/scripts/cdrh/cfdocs/cfmaude/detail.cfm?mdrfoi__id=24413724&pc=OZD	02/16/2026			02/23/2026			02/16/2026	02/23/2026							TEMPORARY NON-ROLLER TYPE LEFT HEART SUPPORT BLOOD PUMP			IMPELLA 5.5 WITH SMARTASSIST S2 SET, US			OZD						ABIOMED, INC. - 1220648			US		2026802595		1000100		No			No		Yes	No	Health Professional			Manufacturer report
188	1220648-2026-03777	24414131	https://www.accessdata.fda.gov/scripts/cdrh/cfdocs/cfmaude/detail.cfm?mdrfoi__id=24414131&pc=OZD	02/12/2026			02/23/2026			02/13/2026	02/23/2026					02/23/2026		TEMPORARY NON-ROLLER TYPE LEFT HEART SUPPORT BLOOD PUMP			IMPELLA 5.5 WITH SMARTASSIST S2 SET, EU			OZD						ABIOMED, INC. - 1220648			US		2027816562		1000482		No			No		Yes	No	Health Professional			Manufacturer report
189	1220648-2026-03785	24414492	https://www.accessdata.fda.gov/scripts/cdrh/cfdocs/cfmaude/detail.cfm?mdrfoi__id=24414492&pc=OZD	02/13/2026			02/23/2026			02/13/2026	02/23/2026							TEMPORARY NON-ROLLER TYPE LEFT HEART SUPPORT BLOOD PUMP			IMPELLA 5.5 WITH SMARTASSIST S2 SET, US			OZD						ABIOMED, INC. - 1220648			US		2026756714		000000000001000100		No			No		Yes	No	Health Professional			Manufacturer report
190	1220648-2026-03786	24414519	https://www.accessdata.fda.gov/scripts/cdrh/cfdocs/cfmaude/detail.cfm?mdrfoi__id=24414519&pc=OZD	12/04/2025			02/23/2026			02/16/2026	02/23/2026							TEMPORARY NON-ROLLER TYPE LEFT HEART SUPPORT BLOOD PUMP			IMPELLA CONTROLLER, PACKAGED, EU			OZD						ABIOMED, INC. - 1220648			US		1099847		0042-0000-EU		No			Yes		Yes	No	Health Professional			Manufacturer report
191	1220648-2026-03798	24414788	https://www.accessdata.fda.gov/scripts/cdrh/cfdocs/cfmaude/detail.cfm?mdrfoi__id=24414788&pc=OZD	02/13/2026			02/23/2026			02/13/2026	02/23/2026					02/23/2026		TEMPORARY NON-ROLLER TYPE LEFT HEART SUPPORT BLOOD PUMP			IMPELLA 5.5 WITH SMARTASSIST S2 SET, US			OZD						ABIOMED, INC. - 1220648			US		2026806228		000000000001000100		No			No		Yes	No	Health Professional			Manufacturer report
192	1220648-2026-03802	24415192	https://www.accessdata.fda.gov/scripts/cdrh/cfdocs/cfmaude/detail.cfm?mdrfoi__id=24415192&pc=OZD	02/13/2026			02/23/2026			02/13/2026	02/23/2026					02/23/2026		TEMPORARY NON-ROLLER TYPE LEFT HEART SUPPORT BLOOD PUMP			IMPELLA 5.5 WITH SMARTASSIST S2 SET, US			OZD						ABIOMED, INC. - 1220648			US		2026806227		1000100		No			No		Yes	No	Health Professional			Manufacturer report
193	1220648-2026-03803	24415264	https://www.accessdata.fda.gov/scripts/cdrh/cfdocs/cfmaude/detail.cfm?mdrfoi__id=24415264&pc=OZD	11/22/2025			02/23/2026			11/22/2025	02/23/2026							TEMPORARY NON-ROLLER TYPE LEFT HEART SUPPORT BLOOD PUMP			IMPELLA 5.5 WITH SMARTASSIST S2 SET, US			OZD			IMPELLA 5.5 WITH SMARTASSIST S2 SET, US			ABIOMED, INC. - 1220648			US		2026730016		000000000001000100		No			No		Yes	No				Manufacturer report
194	1220648-2026-03805	24415405	https://www.accessdata.fda.gov/scripts/cdrh/cfdocs/cfmaude/detail.cfm?mdrfoi__id=24415405&pc=OZD	10/29/2025			02/23/2026			10/29/2025	02/23/2026					02/23/2026		TEMPORARY NON-ROLLER TYPE LEFT HEART SUPPORT BLOOD PUMP			IMPELLA 5.5 WITH SMARTASSIST S2 SET, US			OZD			IMPELLA 5.5 WITH SMARTASSIST S2 SET, US			ABIOMED, INC. - 1220648			US		2026637869		000000000001000100		No			No		Yes	No	Health Professional			Manufacturer report
195	1220648-2026-03806	24415425	https://www.accessdata.fda.gov/scripts/cdrh/cfdocs/cfmaude/detail.cfm?mdrfoi__id=24415425&pc=OZD	11/24/2025			02/23/2026			11/24/2025	02/23/2026					02/23/2026		TEMPORARY NON-ROLLER TYPE LEFT HEART SUPPORT BLOOD PUMP			IMPELLA 5.5 WITH SMARTASSIST S2 SET, US			OZD			IMPELLA 5.5 WITH SMARTASSIST S2 SET, US			ABIOMED, INC. - 1220648			US		2026771203		000000000001000100		No			No		Yes	No	Health Professional			Manufacturer report
196	1220648-2026-03808	24415495	https://www.accessdata.fda.gov/scripts/cdrh/cfdocs/cfmaude/detail.cfm?mdrfoi__id=24415495&pc=OZD	02/16/2026			02/23/2026			02/16/2026	02/23/2026							TEMPORARY NON-ROLLER TYPE LEFT HEART SUPPORT BLOOD PUMP			IMPELLA 5.5 WITH SMARTASSIST S2 SET, US			OZD						ABIOMED, INC. - 1220648			US		2027816102		1000100		No			No		Yes	No	Health Professional			Manufacturer report
197	1220648-2026-03807	24415504	https://www.accessdata.fda.gov/scripts/cdrh/cfdocs/cfmaude/detail.cfm?mdrfoi__id=24415504&pc=OZD	11/21/2025			02/23/2026			11/24/2025	02/23/2026					02/23/2026		TEMPORARY NON-ROLLER TYPE LEFT HEART SUPPORT BLOOD PUMP			IMPELLA 5.5 WITH SMARTASSIST S2 SET, US			OZD			IMPELLA 5.5 WITH SMARTASSIST S2 SET, US			ABIOMED, INC. - 1220648			US		2025612301		000000000001000100		No			No		Yes	No	Health Professional			Manufacturer report
198	1220648-2026-03810	24415592	https://www.accessdata.fda.gov/scripts/cdrh/cfdocs/cfmaude/detail.cfm?mdrfoi__id=24415592&pc=OZD	02/09/2026			02/23/2026			02/10/2026	02/23/2026			02/28/2026				TEMPORARY NON-ROLLER TYPE LEFT HEART SUPPORT BLOOD PUMP			IMPELLA 5.5 WITH SMARTASSIST S2 SET, US			OZD						ABIOMED, INC. - 1220648			US		2025474858		1000100		No			No		Yes	No	Health Professional			Manufacturer report
199	1220648-2026-03811	24415613	https://www.accessdata.fda.gov/scripts/cdrh/cfdocs/cfmaude/detail.cfm?mdrfoi__id=24415613&pc=OZD	10/29/2025			02/23/2026			10/29/2025	02/23/2026					02/23/2026		TEMPORARY NON-ROLLER TYPE LEFT HEART SUPPORT BLOOD PUMP			IMPELLA 5.5 WITH SMARTASSIST S2 SET, US			OZD			IMPELLA 5.5 WITH SMARTASSIST S2 SET, US			ABIOMED, INC. - 1220648			US		2026747637		000000000001000100		No			No		Yes	No	Health Professional			Manufacturer report
200	1220648-2026-03815	24415728	https://www.accessdata.fda.gov/scripts/cdrh/cfdocs/cfmaude/detail.cfm?mdrfoi__id=24415728&pc=OZD	12/20/2025			02/23/2026			12/21/2025	02/23/2026							TEMPORARY NON-ROLLER TYPE LEFT HEART SUPPORT BLOOD PUMP			IMPELLA 5.5 WITH SMARTASSIST S2 SET, US			OZD			IMPELLA 5.5 WITH SMARTASSIST S2 SET, US			ABIOMED, INC. - 1220648			US		2026744948		000000000001000100		No			No		Yes	No	Health Professional			Manufacturer report
201	1220648-2026-03816	24415745	https://www.accessdata.fda.gov/scripts/cdrh/cfdocs/cfmaude/detail.cfm?mdrfoi__id=24415745&pc=OZD	02/16/2026			02/23/2026			02/16/2026	02/23/2026					02/23/2026		TEMPORARY NON-ROLLER TYPE LEFT HEART SUPPORT BLOOD PUMP			IMPELLA CONTROLLER, PACKAGED, US			OZD						ABIOMED, INC. - 1220648			US		1147694		0042-0000-US		No			No		No	No	Health Professional			Manufacturer report
202	1220648-2026-03819	24416018	https://www.accessdata.fda.gov/scripts/cdrh/cfdocs/cfmaude/detail.cfm?mdrfoi__id=24416018&pc=OZD	02/16/2026			02/23/2026			02/16/2026	02/23/2026					02/23/2026		TEMPORARY NON-ROLLER TYPE LEFT HEART SUPPORT BLOOD PUMP			IMPELLA 5.5 WITH SMARTASSIST S2 SET, US			OZD						ABIOMED, INC. - 1220648			US		2025589304		1000100		No			No		Yes	No	Health Professional			Manufacturer report
203	1220648-2026-03821	24416178	https://www.accessdata.fda.gov/scripts/cdrh/cfdocs/cfmaude/detail.cfm?mdrfoi__id=24416178&pc=OZD	11/08/2025			02/23/2026			11/08/2025	02/23/2026							TEMPORARY NON-ROLLER TYPE LEFT HEART SUPPORT BLOOD PUMP			IMPELLA 5.5 WITH SMARTASSIST S2 SET, US			OZD			IMPELLA 5.5 WITH SMARTASSIST S2 SET, US			ABIOMED, INC. - 1220648			US		2026631248		000000000001000100		No			No		Yes	No	Health Professional			Manufacturer report
204	1220648-2026-03823	24416425	https://www.accessdata.fda.gov/scripts/cdrh/cfdocs/cfmaude/detail.cfm?mdrfoi__id=24416425&pc=OZD	02/15/2026			02/23/2026			02/15/2026	02/23/2026					02/23/2026		TEMPORARY NON-ROLLER TYPE LEFT HEART SUPPORT BLOOD PUMP			IMPELLA 5.5 WITH SMARTASSIST S2 SET, US			OZD						ABIOMED, INC. - 1220648			US		2026626875		1000100		No			No		Yes	No	Health Professional			Manufacturer report
205	1220648-2026-03824	24416457	https://www.accessdata.fda.gov/scripts/cdrh/cfdocs/cfmaude/detail.cfm?mdrfoi__id=24416457&pc=OZD	11/07/2025			02/23/2026			11/07/2025	02/23/2026			10/31/2025		02/23/2026		TEMPORARY NON-ROLLER TYPE LEFT HEART SUPPORT BLOOD PUMP			IMPELLA 5.5 WITH SMARTASSIST S2 SET, US			OZD			IMPELLA 5.5 WITH SMARTASSIST S2 SET, US			ABIOMED, INC. - 1220648			US		2024415387		000000000001000100		No			No		Yes	No	Health Professional			Manufacturer report
206	1220648-2026-03831	24417561	https://www.accessdata.fda.gov/scripts/cdrh/cfdocs/cfmaude/detail.cfm?mdrfoi__id=24417561&pc=OZD	12/20/2025			02/23/2026			12/20/2025	02/23/2026							TEMPORARY NON-ROLLER TYPE LEFT HEART SUPPORT BLOOD PUMP			OPTICAL, AIC, IMPELLA CONNECT, PKGD, US			OZD			OPTICAL, AIC, IMPELLA CONNECT, PKGD, US			ABIOMED, INC. - 1220648			US		1683279		0042-0040-US		No			No		No	No	Health Professional			Manufacturer report
207	1220648-2026-03833	24417785	https://www.accessdata.fda.gov/scripts/cdrh/cfdocs/cfmaude/detail.cfm?mdrfoi__id=24417785&pc=OZD	12/21/2025			02/23/2026			12/21/2025	02/23/2026					02/23/2026		TEMPORARY NON-ROLLER TYPE LEFT HEART SUPPORT BLOOD PUMP			IMPELLA 5.5 WITH SMARTASSIST S2 SET, US			OZD			IMPELLA 5.5 WITH SMARTASSIST S2 SET, US			ABIOMED, INC. - 1220648			US		2026775487		000000000001000100		No			No		Yes	No	Health Professional			Manufacturer report
208	1220648-2026-03834	24417986	https://www.accessdata.fda.gov/scripts/cdrh/cfdocs/cfmaude/detail.cfm?mdrfoi__id=24417986&pc=OZD	02/15/2026			02/23/2026			02/16/2026	02/23/2026							TEMPORARY NON-ROLLER TYPE LEFT HEART SUPPORT BLOOD PUMP			IMPELLA CONTROLLER, PACKAGED, JP			OZD						ABIOMED EUROPE GMBH - 3007904765			GM		1398838		0042-0000-JP		Device was returned to manufacturer			No		No	No	Health Professional			Manufacturer report
209	1220648-2026-03836	24418719	https://www.accessdata.fda.gov/scripts/cdrh/cfdocs/cfmaude/detail.cfm?mdrfoi__id=24418719&pc=OZD	12/23/2025			02/23/2026			12/23/2025	02/23/2026					02/23/2026		TEMPORARY NON-ROLLER TYPE LEFT HEART SUPPORT BLOOD PUMP			IMPELLA 5.5 WITH SMARTASSIST S2 SET, US			OZD			IMPELLA 5.5 WITH SMARTASSIST S2 SET, US			ABIOMED, INC. - 1220648			US		2026743300		000000000001000100		No			No		Yes	No	Health Professional			Manufacturer report
210	1220648-2026-03839	24419887	https://www.accessdata.fda.gov/scripts/cdrh/cfdocs/cfmaude/detail.cfm?mdrfoi__id=24419887&pc=OZD	11/29/2025			02/23/2026			11/29/2025	02/23/2026					02/23/2026		TEMPORARY NON-ROLLER TYPE LEFT HEART SUPPORT BLOOD PUMP			IMPELLA CONTROLLER, PACKAGED, US			OZD			IMPELLA CONTROLLER, PACKAGED, US			ABIOMED, INC. - 1220648			US		1123583		0042-0000-US		Device was returned to manufacturer			No		No	No	Health Professional			Manufacturer report
211	1220648-2026-03837	24419916	https://www.accessdata.fda.gov/scripts/cdrh/cfdocs/cfmaude/detail.cfm?mdrfoi__id=24419916&pc=OZD	11/29/2025			02/23/2026			11/29/2025	02/23/2026							TEMPORARY NON-ROLLER TYPE LEFT HEART SUPPORT BLOOD PUMP			IMPELLA 5.5 WITH SMARTASSIST S2 SET, US			OZD			IMPELLA 5.5 WITH SMARTASSIST S2 SET, US			ABIOMED, INC. - 1220648			US		2026735831		000000000001000100		No			No		Yes	No	Health Professional			Manufacturer report
212	1220648-2026-03838	24419947	https://www.accessdata.fda.gov/scripts/cdrh/cfdocs/cfmaude/detail.cfm?mdrfoi__id=24419947&pc=OZD	11/29/2025			02/23/2026			11/29/2025	02/23/2026							TEMPORARY NON-ROLLER TYPE LEFT HEART SUPPORT BLOOD PUMP			IMPELLA CONTROLLER, PACKAGED, US			OZD			IMPELLA CONTROLLER, PACKAGED, US			ABIOMED, INC. - 1220648			US		1183120		0042-0000-US		No			No		No	No	Health Professional			Manufacturer report
213	1220648-2026-03849	24421133	https://www.accessdata.fda.gov/scripts/cdrh/cfdocs/cfmaude/detail.cfm?mdrfoi__id=24421133&pc=OZD	11/26/2025			02/23/2026			11/26/2025	02/23/2026							TEMPORARY NON-ROLLER TYPE LEFT HEART SUPPORT BLOOD PUMP			IMPELLA 5.5 WITH SMARTASSIST S2 SET, US			OZD			IMPELLA 5.5 WITH SMARTASSIST S2 SET, US			ABIOMED, INC. - 1220648			US		2026691733		000000000001000100		No			No		Yes	No	Health Professional			Manufacturer report
214	1220648-2026-03852	24421480	https://www.accessdata.fda.gov/scripts/cdrh/cfdocs/cfmaude/detail.cfm?mdrfoi__id=24421480&pc=OZD	12/04/2025			02/23/2026			12/04/2025	02/23/2026							TEMPORARY NON-ROLLER TYPE LEFT HEART SUPPORT BLOOD PUMP			OPTICAL, AIC, IMPELLA CONNECT, PKGD, US			OZD			OPTICAL, AIC, IMPELLA CONNECT, PKGD, US			ABIOMED, INC. - 1220648			US		1542953		0042-0040-US		No			No		No	No	Health Professional			Manufacturer report
215	1220648-2026-03853	24421659	https://www.accessdata.fda.gov/scripts/cdrh/cfdocs/cfmaude/detail.cfm?mdrfoi__id=24421659&pc=OZD	12/16/2025			02/23/2026			12/16/2025	02/23/2026							TEMPORARY NON-ROLLER TYPE LEFT HEART SUPPORT BLOOD PUMP			OPTICAL, AIC, IMPELLA CONNECT, PKGD, US			OZD			OPTICAL, AIC, IMPELLA CONNECT, PKGD, US			ABIOMED, INC. - 1220648			US		1548998		0042-0040-US		No			No		Yes	No	Health Professional			Manufacturer report
216	1220648-2026-03855	24423758	https://www.accessdata.fda.gov/scripts/cdrh/cfdocs/cfmaude/detail.cfm?mdrfoi__id=24423758&pc=OZD	02/13/2026			02/23/2026			02/14/2026	02/23/2026							TEMPORARY NON-ROLLER TYPE LEFT HEART SUPPORT BLOOD PUMP			IMPELLA 5.5 WITH SMARTASSIST S2 SET, US			OZD						ABIOMED, INC. - 1220648			US		2026721352		1000100		No			No		Yes	No	Health Professional			Manufacturer report
217	1220648-2026-03857	24424168	https://www.accessdata.fda.gov/scripts/cdrh/cfdocs/cfmaude/detail.cfm?mdrfoi__id=24424168&pc=OZD	02/16/2026			02/23/2026			02/16/2026	02/23/2026							TEMPORARY NON-ROLLER TYPE LEFT HEART SUPPORT BLOOD PUMP			IMPELLA 5.5 WITH SMARTASSIST S2 SET, US			OZD						ABIOMED, INC. - 1220648			US		2026689023		1000100		No			No		Yes	No	Health Professional			Manufacturer report
218	1220648-2026-03858	24424562	https://www.accessdata.fda.gov/scripts/cdrh/cfdocs/cfmaude/detail.cfm?mdrfoi__id=24424562&pc=OZD	12/04/2025			02/23/2026			12/04/2025	02/23/2026							TEMPORARY NON-ROLLER TYPE LEFT HEART SUPPORT BLOOD PUMP			IMPELLA 5.5 WITH SMARTASSIST S2 SET, US			OZD			IMPELLA 5.5 WITH SMARTASSIST S2 SET, US			ABIOMED, INC. - 1220648			US		2026713057		000000000001000100		No			No		Yes	No	Health Professional			Manufacturer report
219	1220648-2026-03861	24424573	https://www.accessdata.fda.gov/scripts/cdrh/cfdocs/cfmaude/detail.cfm?mdrfoi__id=24424573&pc=OZD	11/23/2025			02/23/2026			11/23/2025	02/23/2026					02/23/2026		TEMPORARY NON-ROLLER TYPE LEFT HEART SUPPORT BLOOD PUMP			IMPELLA 5.5 WITH SMARTASSIST S2 SET, US			OZD			IMPELLA 5.5 WITH SMARTASSIST S2 SET, US			ABIOMED, INC. - 1220648			US		2026737453		000000000001000100		No			No		Yes	No	Health Professional			Manufacturer report
220	1220648-2026-03862	24424577	https://www.accessdata.fda.gov/scripts/cdrh/cfdocs/cfmaude/detail.cfm?mdrfoi__id=24424577&pc=OZD	11/18/2025			02/23/2026			11/18/2025	02/23/2026							TEMPORARY NON-ROLLER TYPE LEFT HEART SUPPORT BLOOD PUMP			IMPELLA 5.5 WITH SMARTASSIST S2 SET, US			OZD			IMPELLA 5.5 WITH SMARTASSIST S2 SET, US			ABIOMED, INC. - 1220648			US		2026745728		000000000001000100		No			No		Yes	No	Health Professional			Manufacturer report
221	1220648-2026-03863	24424580	https://www.accessdata.fda.gov/scripts/cdrh/cfdocs/cfmaude/detail.cfm?mdrfoi__id=24424580&pc=OZD	12/04/2025			02/23/2026			12/04/2025	02/23/2026					02/23/2026		TEMPORARY NON-ROLLER TYPE LEFT HEART SUPPORT BLOOD PUMP			IMPELLA 5.5 WITH SMARTASSIST S2 SET, US			OZD			IMPELLA 5.5 WITH SMARTASSIST S2 SET, US			ABIOMED, INC. - 1220648			US		2026771234		000000000001000100		No			No		Yes	No	Health Professional			Manufacturer report
222	1220648-2026-03864	24424582	https://www.accessdata.fda.gov/scripts/cdrh/cfdocs/cfmaude/detail.cfm?mdrfoi__id=24424582&pc=OZD	12/04/2025			02/23/2026			12/04/2025	02/23/2026			02/28/2026		02/23/2026		TEMPORARY NON-ROLLER TYPE LEFT HEART SUPPORT BLOOD PUMP			IMPELLA 5.5 WITH SMARTASSIST S2 SET, US			OZD			IMPELLA 5.5 WITH SMARTASSIST S2 SET, US			ABIOMED, INC. - 1220648			US		2025479896		000000000001000100		No			No		Yes	No	Health Professional			Manufacturer report
223	1220648-2026-03865	24424584	https://www.accessdata.fda.gov/scripts/cdrh/cfdocs/cfmaude/detail.cfm?mdrfoi__id=24424584&pc=OZD	12/05/2025			02/23/2026			12/05/2025	02/23/2026					02/23/2026		TEMPORARY NON-ROLLER TYPE LEFT HEART SUPPORT BLOOD PUMP			IMPELLA 5.5 WITH SMARTASSIST S2 SET, US			OZD			IMPELLA 5.5 WITH SMARTASSIST S2 SET, US			ABIOMED, INC. - 1220648			US		2026779269		000000000001000100		No			No		Yes	No	Health Professional			Manufacturer report
224	1220648-2026-03868	24424590	https://www.accessdata.fda.gov/scripts/cdrh/cfdocs/cfmaude/detail.cfm?mdrfoi__id=24424590&pc=OZD	12/18/2025			02/23/2026			12/18/2025	02/23/2026					02/23/2026		TEMPORARY NON-ROLLER TYPE LEFT HEART SUPPORT BLOOD PUMP			IMPELLA 5.5 WITH SMARTASSIST S2 SET, US			OZD			IMPELLA 5.5 WITH SMARTASSIST S2 SET, US			ABIOMED, INC. - 1220648			US		2026678240		000000000001000100		No			No		Yes	No	Health Professional			Manufacturer report
225	1220648-2026-03870	24424617	https://www.accessdata.fda.gov/scripts/cdrh/cfdocs/cfmaude/detail.cfm?mdrfoi__id=24424617&pc=OZD	12/20/2025			02/23/2026			12/20/2025	02/23/2026					02/23/2026		TEMPORARY NON-ROLLER TYPE LEFT HEART SUPPORT BLOOD PUMP			IMPELLA 5.5 WITH SMARTASSIST S2 SET, US			OZD			IMPELLA 5.5 WITH SMARTASSIST S2 SET, US			ABIOMED, INC. - 1220648			US		2026632528		000000000001000100		No			No		Yes	No	Health Professional			Manufacturer report
226	1220648-2026-03871	24424621	https://www.accessdata.fda.gov/scripts/cdrh/cfdocs/cfmaude/detail.cfm?mdrfoi__id=24424621&pc=OZD	12/21/2025			02/23/2026			12/21/2025	02/23/2026							TEMPORARY NON-ROLLER TYPE LEFT HEART SUPPORT BLOOD PUMP			IMPELLA 5.5 WITH SMARTASSIST S2 SET, US			OZD			IMPELLA 5.5 WITH SMARTASSIST S2 SET, US			ABIOMED, INC. - 1220648			US		2026765457		000000000001000100		No			No		Yes	No	Health Professional			Manufacturer report
227	1220648-2026-03736	24410609	https://www.accessdata.fda.gov/scripts/cdrh/cfdocs/cfmaude/detail.cfm?mdrfoi__id=24410609&pc=OZD	02/14/2026			02/22/2026			02/14/2026	02/22/2026					02/22/2026		TEMPORARY NON-ROLLER TYPE LEFT HEART SUPPORT BLOOD PUMP			IMPELLA 5.5 WITH SMARTASSIST S2 SET, US			OZD						ABIOMED, INC. - 1220648			US		2026809749		1000100		No			No		Yes	No	Health Professional			Manufacturer report
228	1220648-2026-03739	24410624	https://www.accessdata.fda.gov/scripts/cdrh/cfdocs/cfmaude/detail.cfm?mdrfoi__id=24410624&pc=OZD	02/15/2026			02/22/2026			02/15/2026	02/22/2026							TEMPORARY NON-ROLLER TYPE LEFT HEART SUPPORT BLOOD PUMP			IMPELLA CP SMART ASSIST SET, JP			OZD						ABIOMED, INC. - 1220648			US		2026790250		0048-0024-JP		No			No		Yes	No	Health Professional			Manufacturer report
229	1220648-2026-03740	24410626	https://www.accessdata.fda.gov/scripts/cdrh/cfdocs/cfmaude/detail.cfm?mdrfoi__id=24410626&pc=OZD	02/15/2026			02/22/2026			02/16/2026	02/22/2026					02/22/2026		TEMPORARY NON-ROLLER TYPE LEFT HEART SUPPORT BLOOD PUMP			IMPELLA 5.5 WITH SMARTASSIST S2 SET, US			OZD						ABIOMED, INC. - 1220648			US		2026812881		1000100		Device was returned to manufacturer			No		Yes	No	Health Professional			Manufacturer report
230	1220648-2026-03720	24410278	https://www.accessdata.fda.gov/scripts/cdrh/cfdocs/cfmaude/detail.cfm?mdrfoi__id=24410278&pc=OZD	10/29/2025			02/21/2026			10/29/2025	02/21/2026							TEMPORARY NON-ROLLER TYPE LEFT HEART SUPPORT BLOOD PUMP			IMPELLA 5.5 WITH SMARTASSIST S2 SET, US			OZD						ABIOMED, INC. - 1220648			US		2026729448		000000000001000100		No			No		No	No	Health Professional			Manufacturer report
231	1220648-2026-03721	24410290	https://www.accessdata.fda.gov/scripts/cdrh/cfdocs/cfmaude/detail.cfm?mdrfoi__id=24410290&pc=OZD	10/29/2025			02/21/2026			10/29/2025	02/21/2026					02/21/2026		TEMPORARY NON-ROLLER TYPE LEFT HEART SUPPORT BLOOD PUMP			IMPELLA 5.5 WITH SMARTASSIST S2 SET, US			OZD						ABIOMED, INC. - 1220648			US		2026737038		000000000001000100		No			No		Yes	No	Health Professional			Manufacturer report
232	1220648-2026-03723	24410308	https://www.accessdata.fda.gov/scripts/cdrh/cfdocs/cfmaude/detail.cfm?mdrfoi__id=24410308&pc=OZD	10/29/2025			02/21/2026			10/29/2025	02/21/2026					02/21/2026		TEMPORARY NON-ROLLER TYPE LEFT HEART SUPPORT BLOOD PUMP			IMPELLA 5.5 WITH SMARTASSIST S2 SET, US			OZD						ABIOMED, INC. - 1220648			US		2026735830		000000000001000100		No			No		Yes	No	Health Professional			Manufacturer report
233	1220648-2026-03724	24410326	https://www.accessdata.fda.gov/scripts/cdrh/cfdocs/cfmaude/detail.cfm?mdrfoi__id=24410326&pc=OZD	10/30/2025			02/21/2026			10/30/2025	02/21/2026							TEMPORARY NON-ROLLER TYPE LEFT HEART SUPPORT BLOOD PUMP			IMPELLA 5.5 WITH SMARTASSIST S2 SET, US			OZD						ABIOMED, INC. - 1220648			US		2026722324		000000000001000100		No			No		Yes	No	Health Professional			Manufacturer report
234	1220648-2026-03726	24410352	https://www.accessdata.fda.gov/scripts/cdrh/cfdocs/cfmaude/detail.cfm?mdrfoi__id=24410352&pc=OZD	10/30/2025			02/21/2026			10/30/2025	02/21/2026					02/21/2026		TEMPORARY NON-ROLLER TYPE LEFT HEART SUPPORT BLOOD PUMP			IMPELLA 5.5 WITH SMARTASSIST S2 SET, US			OZD						ABIOMED, INC. - 1220648			US		2026713399		000000000001000100		No			No		Yes	No	Health Professional			Manufacturer report
235	1220648-2026-03727	24410353	https://www.accessdata.fda.gov/scripts/cdrh/cfdocs/cfmaude/detail.cfm?mdrfoi__id=24410353&pc=OZD	10/30/2025			02/21/2026			10/30/2025	02/21/2026					02/21/2026		TEMPORARY NON-ROLLER TYPE LEFT HEART SUPPORT BLOOD PUMP			IMPELLA 5.5 WITH SMARTASSIST S2 SET, US			OZD						ABIOMED, INC. - 1220648			US		2026721349		000000000001000100		No			No		Yes	No	Health Professional			Manufacturer report
236	1220648-2026-03729	24410359	https://www.accessdata.fda.gov/scripts/cdrh/cfdocs/cfmaude/detail.cfm?mdrfoi__id=24410359&pc=OZD	10/30/2025			02/21/2026			10/30/2025	02/21/2026							TEMPORARY NON-ROLLER TYPE LEFT HEART SUPPORT BLOOD PUMP			IMPELLA 5.5 WITH SMARTASSIST S2 SET, US			OZD						ABIOMED, INC. - 1220648			US		2026663242		000000000001000100		No			No		Yes	No	Health Professional			Manufacturer report
237	1220648-2026-03638	24399731	https://www.accessdata.fda.gov/scripts/cdrh/cfdocs/cfmaude/detail.cfm?mdrfoi__id=24399731&pc=OZD	11/20/2025			02/20/2026			11/20/2025	02/20/2026							TEMPORARY NON-ROLLER TYPE LEFT HEART SUPPORT BLOOD PUMP			IMPELLA 5.5 WITH SMARTASSIST S2 SET, US			OZD			IMPELLA 5.5 WITH SMARTASSIST S2 SET, US			ABIOMED, INC. - 1220648			US		2026669818		000000000001000100		No			No		Yes	No	Health Professional			Manufacturer report
238	1220648-2026-03642	24399806	https://www.accessdata.fda.gov/scripts/cdrh/cfdocs/cfmaude/detail.cfm?mdrfoi__id=24399806&pc=OZD	11/21/2025			02/20/2026			11/21/2025	02/20/2026					02/20/2026		TEMPORARY NON-ROLLER TYPE LEFT HEART SUPPORT BLOOD PUMP			IMPELLA 5.5 WITH SMARTASSIST S2 SET, US			OZD			IMPELLA 5.5 WITH SMARTASSIST S2 SET, US			ABIOMED, INC. - 1220648			US		2026766878		000000000001000100		No			No		Yes	No	Health Professional			Manufacturer report
239	1220648-2026-03643	24399813	https://www.accessdata.fda.gov/scripts/cdrh/cfdocs/cfmaude/detail.cfm?mdrfoi__id=24399813&pc=OZD	11/22/2025			02/20/2026			11/22/2025	02/20/2026					02/20/2026		TEMPORARY NON-ROLLER TYPE LEFT HEART SUPPORT BLOOD PUMP			IMPELLA 5.5 WITH SMARTASSIST S2 SET, US			OZD			IMPELLA 5.5 WITH SMARTASSIST S2 SET, US			ABIOMED, INC. - 1220648			US		2026765800		000000000001000100		No			No		Yes	No				Manufacturer report
240	1220648-2026-03644	24399830	https://www.accessdata.fda.gov/scripts/cdrh/cfdocs/cfmaude/detail.cfm?mdrfoi__id=24399830&pc=OZD	11/22/2025			02/20/2026			11/22/2025	02/20/2026							TEMPORARY NON-ROLLER TYPE LEFT HEART SUPPORT BLOOD PUMP			IMPELLA 5.5 WITH SMARTASSIST S2 SET, US			OZD			IMPELLA 5.5 WITH SMARTASSIST S2 SET, US			ABIOMED, INC. - 1220648			US		2026748336		000000000001000100		No			No		Yes	No	Health Professional			Manufacturer report
241	1220648-2026-03645	24399833	https://www.accessdata.fda.gov/scripts/cdrh/cfdocs/cfmaude/detail.cfm?mdrfoi__id=24399833&pc=OZD	11/22/2025			02/20/2026			11/22/2025	02/20/2026					02/20/2026		TEMPORARY NON-ROLLER TYPE LEFT HEART SUPPORT BLOOD PUMP			IMPELLA 5.5 WITH SMARTASSIST S2 SET, US			OZD						ABIOMED, INC. - 1220648			US		2026716169		000000000001000100		No			No		Yes	No	Health Professional			Manufacturer report
242	1220648-2026-03646	24399845	https://www.accessdata.fda.gov/scripts/cdrh/cfdocs/cfmaude/detail.cfm?mdrfoi__id=24399845&pc=OZD	11/23/2025			02/20/2026			11/23/2025	02/20/2026					02/20/2026		TEMPORARY NON-ROLLER TYPE LEFT HEART SUPPORT BLOOD PUMP			IMPELLA 5.5 WITH SMARTASSIST S2 SET, US			OZD			IMPELLA 5.5 WITH SMARTASSIST S2 SET, US			ABIOMED, INC. - 1220648			US		2026757906		000000000001000100		No			No		Yes	No	Health Professional			Manufacturer report
243	1220648-2026-03648	24399852	https://www.accessdata.fda.gov/scripts/cdrh/cfdocs/cfmaude/detail.cfm?mdrfoi__id=24399852&pc=OZD	11/23/2025			02/20/2026			11/23/2025	02/20/2026					02/20/2026		TEMPORARY NON-ROLLER TYPE LEFT HEART SUPPORT BLOOD PUMP			IMPELLA 5.5 WITH SMARTASSIST S2 SET, US			OZD			IMPELLA 5.5 WITH SMARTASSIST S2 SET, US			ABIOMED, INC. - 1220648			US		2026748270		000000000001000100		No			No		Yes	No	Health Professional			Manufacturer report
244	1220648-2026-03650	24399861	https://www.accessdata.fda.gov/scripts/cdrh/cfdocs/cfmaude/detail.cfm?mdrfoi__id=24399861&pc=OZD	02/13/2026			02/20/2026			02/13/2026	02/20/2026					02/20/2026		TEMPORARY NON-ROLLER TYPE LEFT HEART SUPPORT BLOOD PUMP			IMPELLA 5.5 WITH SMARTASSIST S2 SET, US			OZD						ABIOMED, INC. - 1220648			US		2026802420		000000000001000100		No			No		Yes	No	Health Professional			Manufacturer report
245	1220648-2026-03651	24399877	https://www.accessdata.fda.gov/scripts/cdrh/cfdocs/cfmaude/detail.cfm?mdrfoi__id=24399877&pc=OZD	11/23/2025			02/20/2026			11/24/2025	02/20/2026					02/20/2026		TEMPORARY NON-ROLLER TYPE LEFT HEART SUPPORT BLOOD PUMP			IMPELLA 5.5 WITH SMARTASSIST S2 SET, US			OZD			IMPELLA 5.5 WITH SMARTASSIST S2 SET, US			ABIOMED, INC. - 1220648			US		2026743983		000000000001000100		No			No		Yes	No	Health Professional			Manufacturer report
246	1220648-2026-03652	24399900	https://www.accessdata.fda.gov/scripts/cdrh/cfdocs/cfmaude/detail.cfm?mdrfoi__id=24399900&pc=OZD	11/24/2025			02/20/2026			11/24/2025	02/20/2026							TEMPORARY NON-ROLLER TYPE LEFT HEART SUPPORT BLOOD PUMP			IMPELLA 5.5 WITH SMARTASSIST S2 SET, US			OZD			IMPELLA 5.5 WITH SMARTASSIST S2 SET, US			ABIOMED, INC. - 1220648			US		2026686439		000000000001000100		No			No		Yes	No	Health Professional			Manufacturer report
247	1220648-2026-03655	24399915	https://www.accessdata.fda.gov/scripts/cdrh/cfdocs/cfmaude/detail.cfm?mdrfoi__id=24399915&pc=OZD	02/11/2026			02/20/2026			02/11/2026	02/20/2026							TEMPORARY NON-ROLLER TYPE LEFT HEART SUPPORT BLOOD PUMP			IMPELLA 5.5 WITH SMARTASSIST S2 SET, US			OZD						ABIOMED, INC. - 1220648			US		2026745773		1000100		No			No		Yes	No	Health Professional			Manufacturer report
248	1220648-2026-03657	24399951	https://www.accessdata.fda.gov/scripts/cdrh/cfdocs/cfmaude/detail.cfm?mdrfoi__id=24399951&pc=OZD	02/12/2026			02/20/2026			02/12/2026	02/20/2026							TEMPORARY NON-ROLLER TYPE LEFT HEART SUPPORT BLOOD PUMP			IMPELLA 5.5 WITH SMARTASSIST S2 SET, US			OZD						ABIOMED, INC. - 1220648			US		2026779298		1000100		No			No		Yes	No	Health Professional			Manufacturer report
249	1220648-2026-03658	24399960	https://www.accessdata.fda.gov/scripts/cdrh/cfdocs/cfmaude/detail.cfm?mdrfoi__id=24399960&pc=OZD	02/11/2026			02/20/2026			02/12/2026	02/20/2026							TEMPORARY NON-ROLLER TYPE LEFT HEART SUPPORT BLOOD PUMP			IMPELLA OPTICAL CONTROLLER, PACKAGED, EU			OZD						ABIOMED, INC. - 1220648			US		1429644		0042-0010-EU		No			No		No	No	Health Professional			Manufacturer report
250	24400018	24400018	https://www.accessdata.fda.gov/scripts/cdrh/cfdocs/cfmaude/detail.cfm?mdrfoi__id=24400018&pc=OZD	01/22/2026	02/12/2026	02/12/2026	02/20/2026	02/12/2026	02/20/2026		02/20/2026					02/20/2026		TEMPORARY NON-ROLLER TYPE LEFT HEART SUPPORT BLOOD PUMP			IMPELLA			OZD			1000100			ABIOMED, INC.			US				1000100		Device was returned to manufacturer			Not Available			No	Health Professional			User Facility report
251	1220648-2026-03662	24400061	https://www.accessdata.fda.gov/scripts/cdrh/cfdocs/cfmaude/detail.cfm?mdrfoi__id=24400061&pc=OZD	01/31/2026			02/20/2026			01/31/2026	02/20/2026							TEMPORARY NON-ROLLER TYPE LEFT HEART SUPPORT BLOOD PUMP			IMPELLA CONTROLLER, PACKAGED, US			OZD						ABIOMED, INC. - 1220648			US		1288953		0042-0000-US		No			No		No	No	Health Professional			Manufacturer report
252	1220648-2026-03666	24400226	https://www.accessdata.fda.gov/scripts/cdrh/cfdocs/cfmaude/detail.cfm?mdrfoi__id=24400226&pc=OZD	02/13/2026			02/20/2026			02/13/2026	02/20/2026					02/20/2026		TEMPORARY NON-ROLLER TYPE LEFT HEART SUPPORT BLOOD PUMP			OPTICAL, AIC, IMPELLA CONNECT, PKGD, US			OZD						ABIOMED, INC. - 1220648			US		1805843		0042-0040-US		No			No		No	No	Health Professional			Manufacturer report
253	1220648-2026-03667	24400273	https://www.accessdata.fda.gov/scripts/cdrh/cfdocs/cfmaude/detail.cfm?mdrfoi__id=24400273&pc=OZD	02/13/2026			02/20/2026			02/13/2026	02/20/2026					02/20/2026		TEMPORARY NON-ROLLER TYPE LEFT HEART SUPPORT BLOOD PUMP			OPTICAL, AIC, IMPELLA CONNECT, PKGD, US			OZD						ABIOMED, INC. - 1220648			US		1776251		0042-0040-US		No			No		No	No	Health Professional			Manufacturer report
254	1220648-2026-03668	24400351	https://www.accessdata.fda.gov/scripts/cdrh/cfdocs/cfmaude/detail.cfm?mdrfoi__id=24400351&pc=OZD	02/11/2026			02/20/2026			02/11/2026	02/20/2026							TEMPORARY NON-ROLLER TYPE LEFT HEART SUPPORT BLOOD PUMP			OPTICAL, AIC, IMPELLA CONNECT, PKGD, US			OZD						ABIOMED, INC. - 1220648			US		1486033		0042-0040-US		No			No		No	No	Health Professional			Manufacturer report
255	1220648-2026-03669	24400374	https://www.accessdata.fda.gov/scripts/cdrh/cfdocs/cfmaude/detail.cfm?mdrfoi__id=24400374&pc=OZD	02/14/2026			02/20/2026			02/14/2026	02/20/2026							TEMPORARY NON-ROLLER TYPE LEFT HEART SUPPORT BLOOD PUMP			IMPELLA 5.5 WITH SMARTASSIST S2 SET, US			OZD						ABIOMED, INC. - 1220648			US		2026809746		1000100		No			No		Yes	No	Health Professional			Manufacturer report
256	1220648-2026-03670	24400398	https://www.accessdata.fda.gov/scripts/cdrh/cfdocs/cfmaude/detail.cfm?mdrfoi__id=24400398&pc=OZD	02/13/2026			02/20/2026			02/13/2026	02/20/2026					02/20/2026		TEMPORARY NON-ROLLER TYPE LEFT HEART SUPPORT BLOOD PUMP			IMPELLA CONTROLLER, PACKAGED, US			OZD						ABIOMED, INC. - 1220648			US		1087351		0042-0000-US		No			No		No	No	Health Professional			Manufacturer report
257	1220648-2026-03671	24400416	https://www.accessdata.fda.gov/scripts/cdrh/cfdocs/cfmaude/detail.cfm?mdrfoi__id=24400416&pc=OZD	02/13/2026			02/20/2026			02/13/2026	02/20/2026							TEMPORARY NON-ROLLER TYPE LEFT HEART SUPPORT BLOOD PUMP			IMPELLA OPTICAL CONTROLLER, PACKAGED, US			OZD						ABIOMED, INC. - 1220648			US		1420045		0042-0010-US		No			No		No	No	Health Professional			Manufacturer report
258	1220648-2026-03675	24400757	https://www.accessdata.fda.gov/scripts/cdrh/cfdocs/cfmaude/detail.cfm?mdrfoi__id=24400757&pc=OZD	02/13/2026			02/20/2026			02/13/2026	02/20/2026							TEMPORARY NON-ROLLER TYPE LEFT HEART SUPPORT BLOOD PUMP			IMPELLA 5.5 WITH SMARTASSIST S2 SET, US			OZD						ABIOMED, INC. - 1220648			US		2026765247		000000000001000100		No			No		Yes	No	Health Professional			Manufacturer report
259	1220648-2026-03676	24400761	https://www.accessdata.fda.gov/scripts/cdrh/cfdocs/cfmaude/detail.cfm?mdrfoi__id=24400761&pc=OZD	02/09/2026			02/20/2026			02/12/2026	02/20/2026							TEMPORARY NON-ROLLER TYPE LEFT HEART SUPPORT BLOOD PUMP			IMPELLA 5.5 WITH SMARTASSIST S2 SET, US			OZD						ABIOMED, INC. - 1220648			US		2026802300		1000100		No			No		Yes	No	Health Professional			Manufacturer report
260	1220648-2026-03677	24400778	https://www.accessdata.fda.gov/scripts/cdrh/cfdocs/cfmaude/detail.cfm?mdrfoi__id=24400778&pc=OZD	02/13/2026			02/20/2026			02/13/2026	02/20/2026							TEMPORARY NON-ROLLER TYPE LEFT HEART SUPPORT BLOOD PUMP			IMPELLA 5.5 WITH SMARTASSIST S2 SET, US			OZD						ABIOMED, INC. - 1220648			US		2026814416		000000000001000100		No			No		Yes	No	Health Professional			Manufacturer report
261	1220648-2026-03679	24400792	https://www.accessdata.fda.gov/scripts/cdrh/cfdocs/cfmaude/detail.cfm?mdrfoi__id=24400792&pc=OZD	02/10/2026			02/20/2026			02/14/2026	02/20/2026							TEMPORARY NON-ROLLER TYPE LEFT HEART SUPPORT BLOOD PUMP			IMPELLA 5.5 WITH SMARTASSIST S2 SET, US			OZD						ABIOMED, INC. - 1220648			US		2026806141		1000100		No			No		Yes	No	Health Professional			Manufacturer report
262	1220648-2026-03681	24400877	https://www.accessdata.fda.gov/scripts/cdrh/cfdocs/cfmaude/detail.cfm?mdrfoi__id=24400877&pc=OZD	02/13/2026			02/20/2026			02/13/2026	02/20/2026							TEMPORARY NON-ROLLER TYPE LEFT HEART SUPPORT BLOOD PUMP			IMPELLA 5.5 WITH SMARTASSIST S2 SET, US			OZD						ABIOMED, INC. - 1220648			US		2026797225		000000000001000100		No			No		Yes	No	Health Professional			Manufacturer report
263	1220648-2026-03682	24400897	https://www.accessdata.fda.gov/scripts/cdrh/cfdocs/cfmaude/detail.cfm?mdrfoi__id=24400897&pc=OZD	02/10/2026			02/20/2026			02/10/2026	02/20/2026					02/20/2026		TEMPORARY NON-ROLLER TYPE LEFT HEART SUPPORT BLOOD PUMP			IMPELLA 5.5 WITH SMARTASSIST S2 SET, US			OZD						ABIOMED, INC. - 1220648			US		2026683684		1000100		Device was returned to manufacturer			No		Yes	No	Health Professional			Manufacturer report
264	1220648-2026-03606	24401057	https://www.accessdata.fda.gov/scripts/cdrh/cfdocs/cfmaude/detail.cfm?mdrfoi__id=24401057&pc=OZD	12/22/2025			02/20/2026			12/22/2025	02/20/2026							TEMPORARY NON-ROLLER TYPE LEFT HEART SUPPORT BLOOD PUMP			IMPELLA CONTROLLER, PACKAGED, US			OZD			IMPELLA CONTROLLER, PACKAGED, US			ABIOMED, INC. - 1220648			US		1130885		0042-0000-US		No			No		No	No	Health Professional			Manufacturer report
265	1220648-2026-03688	24402094	https://www.accessdata.fda.gov/scripts/cdrh/cfdocs/cfmaude/detail.cfm?mdrfoi__id=24402094&pc=OZD	12/21/2025			02/20/2026			12/21/2025	02/20/2026					02/20/2026		TEMPORARY NON-ROLLER TYPE LEFT HEART SUPPORT BLOOD PUMP			IMPELLA 5.5 WITH SMARTASSIST S2 SET, US			OZD			IMPELLA 5.5 WITH SMARTASSIST S2 SET, US			ABIOMED, INC. - 1220648			US		2026753181		1000100		No			No		Yes	No	Health Professional			Manufacturer report
266	1220648-2026-03701	24405173	https://www.accessdata.fda.gov/scripts/cdrh/cfdocs/cfmaude/detail.cfm?mdrfoi__id=24405173&pc=OZD	02/12/2026			02/20/2026			02/12/2026	02/20/2026					02/20/2026		TEMPORARY NON-ROLLER TYPE LEFT HEART SUPPORT BLOOD PUMP			OPTICAL, AIC, IMPELLA CONNECT, PKGD, US			OZD						ABIOMED, INC. - 1220648			US		1692374		0042-0040-US		No			No		Yes	No	Health Professional			Manufacturer report
267	1220648-2026-03704	24405362	https://www.accessdata.fda.gov/scripts/cdrh/cfdocs/cfmaude/detail.cfm?mdrfoi__id=24405362&pc=OZD	02/13/2026			02/20/2026			02/14/2026	02/20/2026					02/20/2026		TEMPORARY NON-ROLLER TYPE LEFT HEART SUPPORT BLOOD PUMP			IMPELLA 5.5 WITH SMARTASSIST S2 SET, US			OZD						ABIOMED, INC. - 1220648			US		2026801104		1000100		No			No		Yes		Health Professional			Manufacturer report
268	1220648-2026-03706	24405485	https://www.accessdata.fda.gov/scripts/cdrh/cfdocs/cfmaude/detail.cfm?mdrfoi__id=24405485&pc=OZD	12/19/2025			02/20/2026			12/21/2025	02/20/2026							TEMPORARY NON-ROLLER TYPE LEFT HEART SUPPORT BLOOD PUMP			IMPELLA 5.5 WITH SMARTASSIST S2 SET, US			OZD			IMPELLA 5.5 WITH SMARTASSIST S2 SET, US			ABIOMED, INC. - 1220648			US		2026710575		000000000001000100		No			No		Yes	No	Health Professional			Manufacturer report
269	1220648-2026-03709	24405592	https://www.accessdata.fda.gov/scripts/cdrh/cfdocs/cfmaude/detail.cfm?mdrfoi__id=24405592&pc=OZD	12/21/2025			02/20/2026			12/21/2025	02/20/2026					02/20/2026		TEMPORARY NON-ROLLER TYPE LEFT HEART SUPPORT BLOOD PUMP			IMPELLA 5.5 WITH SMARTASSIST S2 SET, US			OZD			IMPELLA 5.5 WITH SMARTASSIST S2 SET, US			ABIOMED, INC. - 1220648			US		2026782288		000000000001000100		No			No		Yes	No	Health Professional			Manufacturer report
270	1220648-2026-03708	24405619	https://www.accessdata.fda.gov/scripts/cdrh/cfdocs/cfmaude/detail.cfm?mdrfoi__id=24405619&pc=OZD	02/12/2026			02/20/2026			02/12/2026	02/20/2026							TEMPORARY NON-ROLLER TYPE LEFT HEART SUPPORT BLOOD PUMP			IMPELLA CONTROLLER, PACKAGED, US			OZD						ABIOMED, INC. - 1220648			US		1194346		0042-0000-US		No			No		No	No	Health Professional			Manufacturer report
271	1220648-2026-03711	24405761	https://www.accessdata.fda.gov/scripts/cdrh/cfdocs/cfmaude/detail.cfm?mdrfoi__id=24405761&pc=OZD	12/24/2025			02/20/2026			12/24/2025	02/20/2026					02/20/2026		TEMPORARY NON-ROLLER TYPE LEFT HEART SUPPORT BLOOD PUMP			OPTICAL, AIC, IMPELLA CONNECT, PKGD, US			OZD			OPTICAL, AIC, IMPELLA CONNECT, PKGD, US			ABIOMED, INC. - 1220648			US		1505149		0042-0040-US		No			No		No	No	Health Professional			Manufacturer report
272	1220648-2026-03713	24405820	https://www.accessdata.fda.gov/scripts/cdrh/cfdocs/cfmaude/detail.cfm?mdrfoi__id=24405820&pc=OZD	02/01/2026			02/20/2026			02/12/2026	02/20/2026					02/20/2026		TEMPORARY NON-ROLLER TYPE LEFT HEART SUPPORT BLOOD PUMP			OPTICAL, AIC, IMPELLA CONNECT, PKGD, US			OZD						ABIOMED, INC. - 1220648			US		1927390		0042-0040-US		No			No		No	No	Health Professional			Manufacturer report
273	1220648-2026-03714	24405843	https://www.accessdata.fda.gov/scripts/cdrh/cfdocs/cfmaude/detail.cfm?mdrfoi__id=24405843&pc=OZD	12/22/2025			02/20/2026			12/22/2025	02/20/2026							TEMPORARY NON-ROLLER TYPE LEFT HEART SUPPORT BLOOD PUMP			IMPELLA 5.5 WITH SMARTASSIST S2 SET, US			OZD			IMPELLA 5.5 WITH SMARTASSIST S2 SET, US			ABIOMED, INC. - 1220648			US		2026781193		000000000001000100		No			No		Yes	No	Health Professional			Manufacturer report
274	1220648-2026-03719	24408409	https://www.accessdata.fda.gov/scripts/cdrh/cfdocs/cfmaude/detail.cfm?mdrfoi__id=24408409&pc=OZD	11/06/2025			02/20/2026			11/06/2025	02/20/2026							TEMPORARY NON-ROLLER TYPE LEFT HEART SUPPORT BLOOD PUMP			IMPELLA 5.5 WITH SMARTASSIST S2 SET, US			OZD						ABIOMED, INC.			US		2026738763		000000000001000100		No			No		Yes	No	Health Professional			Manufacturer report
275	1220648-2026-03531	24387417	https://www.accessdata.fda.gov/scripts/cdrh/cfdocs/cfmaude/detail.cfm?mdrfoi__id=24387417&pc=OZD	02/09/2026			02/19/2026			02/09/2026	02/19/2026					02/19/2026		TEMPORARY NON-ROLLER TYPE LEFT HEART SUPPORT BLOOD PUMP			IMPELLA 5.5 WITH SMARTASSIST S2 SET, US			OZD						ABIOMED, INC. - 1220648			US		2026769373		1000100		No			No		Yes	No	Health Professional			Manufacturer report
276	1220648-2026-03539	24387613	https://www.accessdata.fda.gov/scripts/cdrh/cfdocs/cfmaude/detail.cfm?mdrfoi__id=24387613&pc=OZD	02/09/2026			02/19/2026			02/09/2026	02/19/2026							TEMPORARY NON-ROLLER TYPE LEFT HEART SUPPORT BLOOD PUMP			OPTICAL, AIC, IMPELLA CONNECT, PKGD, US			OZD						ABIOMED, INC. - 1220648			US		2019073		0042-0040-US		No			No		No	No	Health Professional			Manufacturer report
277	1220648-2026-03544	24387672	https://www.accessdata.fda.gov/scripts/cdrh/cfdocs/cfmaude/detail.cfm?mdrfoi__id=24387672&pc=OZD	02/11/2026			02/19/2026			02/11/2026	02/19/2026					02/19/2026		TEMPORARY NON-ROLLER TYPE LEFT HEART SUPPORT BLOOD PUMP			IMPELLA 5.5 WITH SMARTASSIST S2 SET, US			OZD						ABIOMED, INC. - 1220648			US		2026801616		000000000001000100		No			No		Yes	No	Health Professional			Manufacturer report
278	1220648-2026-03549	24387773	https://www.accessdata.fda.gov/scripts/cdrh/cfdocs/cfmaude/detail.cfm?mdrfoi__id=24387773&pc=OZD	01/01/2026			02/19/2026			02/11/2026	02/19/2026							TEMPORARY NON-ROLLER TYPE LEFT HEART SUPPORT BLOOD PUMP			IMPELLA 5.5 WITH SMARTASSIST S2 SET, EU			OZD						ABIOMED, INC. - 1220648			US		2026748359		000000000001000482		No			No		Yes	No	Health Professional			Manufacturer report
279	1220648-2026-03550	24387802	https://www.accessdata.fda.gov/scripts/cdrh/cfdocs/cfmaude/detail.cfm?mdrfoi__id=24387802&pc=OZD	05/15/2025			02/19/2026			02/10/2026	02/19/2026					02/19/2026		TEMPORARY NON-ROLLER TYPE LEFT HEART SUPPORT BLOOD PUMP			IMPELLA 5.5 WITH SMARTASSIST S2 SET, EU			OZD						ABIOMED, INC. - 1220648			US		2026651969		000000000001000482		No			No		Yes	No	Health Professional			Manufacturer report
280	1220648-2026-03551	24387838	https://www.accessdata.fda.gov/scripts/cdrh/cfdocs/cfmaude/detail.cfm?mdrfoi__id=24387838&pc=OZD	02/10/2026			02/19/2026			02/11/2026	02/19/2026					02/19/2026		TEMPORARY NON-ROLLER TYPE LEFT HEART SUPPORT BLOOD PUMP			IMPELLA 5.5 WITH SMARTASSIST S2 SET, EU			OZD						ABIOMED, INC. - 1220648			US		2026714202		000000000001000482		No			No		Yes	No	Health Professional			Manufacturer report
281	1220648-2026-03552	24387872	https://www.accessdata.fda.gov/scripts/cdrh/cfdocs/cfmaude/detail.cfm?mdrfoi__id=24387872&pc=OZD	02/10/2026			02/19/2026			02/11/2026	02/19/2026					02/19/2026		TEMPORARY NON-ROLLER TYPE LEFT HEART SUPPORT BLOOD PUMP			IMPELLA 5.5 WITH SMARTASSIST S2 SET, US			OZD						ABIOMED, INC. - 1220648			US		2026782831		1000100		No			No		Yes	No	Health Professional			Manufacturer report
282	1220648-2026-03553	24387879	https://www.accessdata.fda.gov/scripts/cdrh/cfdocs/cfmaude/detail.cfm?mdrfoi__id=24387879&pc=OZD	02/10/2026			02/19/2026			02/11/2026	02/19/2026							TEMPORARY NON-ROLLER TYPE LEFT HEART SUPPORT BLOOD PUMP			IMPELLA CP SMART ASSIST SET, JP			OZD						ABIOMED, INC. - 1220648			US		2026793911		0048-0024-JP		No			No		Yes	No	Health Professional			Manufacturer report
283	1220648-2026-03556	24387993	https://www.accessdata.fda.gov/scripts/cdrh/cfdocs/cfmaude/detail.cfm?mdrfoi__id=24387993&pc=OZD	02/11/2026			02/19/2026			02/11/2026	02/19/2026					02/19/2026		TEMPORARY NON-ROLLER TYPE LEFT HEART SUPPORT BLOOD PUMP			IMPELLA 5.5 WITH SMARTASSIST S2 SET, US			OZD						ABIOMED, INC. - 1220648			US		2026719221		000000000001000100		No			No		Yes	No	Health Professional			Manufacturer report
284	1220648-2026-03559	24388070	https://www.accessdata.fda.gov/scripts/cdrh/cfdocs/cfmaude/detail.cfm?mdrfoi__id=24388070&pc=OZD	02/11/2026			02/19/2026			02/11/2026	02/19/2026							TEMPORARY NON-ROLLER TYPE LEFT HEART SUPPORT BLOOD PUMP			IMPELLA 5.5 WITH SMARTASSIST S2 SET, US			OZD						ABIOMED, INC. - 1220648			US		2026805517		000000000001000100		No			No		Yes	No	Health Professional			Manufacturer report
285	1220648-2026-03564	24388758	https://www.accessdata.fda.gov/scripts/cdrh/cfdocs/cfmaude/detail.cfm?mdrfoi__id=24388758&pc=OZD	11/22/2025			02/19/2026			02/13/2026	02/19/2026					02/19/2026		TEMPORARY NON-ROLLER TYPE LEFT HEART SUPPORT BLOOD PUMP			IMPELLA 5.5 SMARTASSIST S2 SET, JP			OZD						ABIOMED, INC. - 1220648			US		2026760817		1000459		No			No		Yes	No	Health Professional			Manufacturer report
286	1220648-2026-03568	24389094	https://www.accessdata.fda.gov/scripts/cdrh/cfdocs/cfmaude/detail.cfm?mdrfoi__id=24389094&pc=OZD	02/11/2026			02/19/2026			02/12/2026	02/19/2026					02/19/2026		P140003			IMPELLA CP SMART ASSIST SET, EU			OZD						ABIOMED, INC. - 1220648			US		2026793428		0048-0014		No			No		Yes	No	Health Professional			Manufacturer report
287	1220648-2026-03571	24389199	https://www.accessdata.fda.gov/scripts/cdrh/cfdocs/cfmaude/detail.cfm?mdrfoi__id=24389199&pc=OZD	02/12/2026			02/19/2026			02/12/2026	02/19/2026					02/19/2026		TEMPORARY NON-ROLLER TYPE LEFT HEART SUPPORT BLOOD PUMP			IMPELLA 5.5 WITH SMARTASSIST S2 SET, US			OZD						ABIOMED, INC. - 1220648			US		2025569103		1000100		No			No		Yes	No	Health Professional			Manufacturer report
288	1220648-2026-03573	24389378	https://www.accessdata.fda.gov/scripts/cdrh/cfdocs/cfmaude/detail.cfm?mdrfoi__id=24389378&pc=OZD	02/12/2026			02/19/2026			02/12/2026	02/19/2026					02/19/2026		TEMPORARY NON-ROLLER TYPE LEFT HEART SUPPORT BLOOD PUMP			IMPELLA 5.5 WITH SMARTASSIST S2 SET, US			OZD						ABIOMED, INC. - 1220648			US		2026802439		1000100		No			No		Yes	No	Health Professional			Manufacturer report
289	1220648-2026-03574	24389383	https://www.accessdata.fda.gov/scripts/cdrh/cfdocs/cfmaude/detail.cfm?mdrfoi__id=24389383&pc=OZD	02/13/2026			02/19/2026			02/13/2026	02/19/2026					02/19/2026		TEMPORARY NON-ROLLER TYPE LEFT HEART SUPPORT BLOOD PUMP			IMPELLA CONTROLLER, PACKAGED, US			OZD						ABIOMED, INC. - 1220648			US		1215712		0042-0000-US		No			No		No	No	Health Professional			Manufacturer report
290	1220648-2026-03575	24389491	https://www.accessdata.fda.gov/scripts/cdrh/cfdocs/cfmaude/detail.cfm?mdrfoi__id=24389491&pc=OZD	01/21/2026			02/19/2026			02/12/2026	02/19/2026					02/19/2026		TEMPORARY NON-ROLLER TYPE LEFT HEART SUPPORT BLOOD PUMP			IMPELLA CP SMART ASSIST SET, EU			OZD						ABIOMED, INC. - 1220648			US		2026660561		0048-0014		No			No		Yes	No	Health Professional			Manufacturer report
291	1220648-2026-03579	24389696	https://www.accessdata.fda.gov/scripts/cdrh/cfdocs/cfmaude/detail.cfm?mdrfoi__id=24389696&pc=OZD	02/11/2026			02/19/2026			02/11/2026	02/19/2026					02/19/2026		TEMPORARY NON-ROLLER TYPE LEFT HEART SUPPORT BLOOD PUMP			IMPELLA CPSA C9+ SET, OUS			OZD						ABIOMED, INC. - 1220648			US		2026807743		1000851		No			No		Yes	No	Health Professional			Manufacturer report
292	1220648-2026-03580	24389750	https://www.accessdata.fda.gov/scripts/cdrh/cfdocs/cfmaude/detail.cfm?mdrfoi__id=24389750&pc=OZD	02/11/2026			02/19/2026			02/12/2026	02/19/2026							TEMPORARY NON-ROLLER TYPE LEFT HEART SUPPORT BLOOD PUMP			IMPELLA 5.5 WITH SMARTASSIST S2 SET, US			OZD						ABIOMED, INC. - 1220648			US		2026757861		1000100		No			No		Yes	No	Health Professional			Manufacturer report
293	1220648-2026-03585	24390005	https://www.accessdata.fda.gov/scripts/cdrh/cfdocs/cfmaude/detail.cfm?mdrfoi__id=24390005&pc=OZD	02/14/2026			02/19/2026			02/14/2026	02/19/2026							TEMPORARY NON-ROLLER TYPE LEFT HEART SUPPORT BLOOD PUMP			IMPELLA 5.5 WITH SMARTASSIST S2 SET, US			OZD						ABIOMED, INC. - 1220648			US		2026811360		1000100		No			No		Yes	No	Health Professional			Manufacturer report
294	1220648-2026-03586	24390008	https://www.accessdata.fda.gov/scripts/cdrh/cfdocs/cfmaude/detail.cfm?mdrfoi__id=24390008&pc=OZD	02/09/2026			02/19/2026			02/12/2026	02/19/2026					02/19/2026		TEMPORARY NON-ROLLER TYPE LEFT HEART SUPPORT BLOOD PUMP			IMPELLA 5.5 SMARTASSIST S2 SET, JP			OZD						ABIOMED, INC. - 1220648			US		2026746502		1000459		No			No		Yes	No	Health Professional			Manufacturer report
295	1220648-2026-03598	24392565	https://www.accessdata.fda.gov/scripts/cdrh/cfdocs/cfmaude/detail.cfm?mdrfoi__id=24392565&pc=OZD	02/07/2026			02/19/2026			02/07/2026	02/19/2026					02/19/2026		TEMPORARY NON-ROLLER TYPE LEFT HEART SUPPORT BLOOD PUMP			IMPELLA 5.5 WITH SMARTASSIST S2 SET, US			OZD						ABIOMED, INC. - 1220648			US		2026795470		1000100		No			No		Yes	No	Health Professional			Manufacturer report
296	1220648-2026-03605	24393210	https://www.accessdata.fda.gov/scripts/cdrh/cfdocs/cfmaude/detail.cfm?mdrfoi__id=24393210&pc=OZD	12/22/2025			02/19/2026			12/22/2025	02/19/2026					02/19/2026		TEMPORARY NON-ROLLER TYPE LEFT HEART SUPPORT BLOOD PUMP			IMPELLA 5.5 WITH SMARTASSIST S2 SET, US			OZD			IMPELLA 5.5 WITH SMARTASSIST S2 SET, US			ABIOMED, INC. - 1220648			US		2026782857		1000100		No			No		Yes	No	Health Professional			Manufacturer report
297	1220648-2026-03603	24393224	https://www.accessdata.fda.gov/scripts/cdrh/cfdocs/cfmaude/detail.cfm?mdrfoi__id=24393224&pc=OZD	12/22/2025			02/19/2026			12/22/2025	02/19/2026							TEMPORARY NON-ROLLER TYPE LEFT HEART SUPPORT BLOOD PUMP			IMPELLA CONTROLLER, PACKAGED, US			OZD			IMPELLA CONTROLLER, PACKAGED, US			ABIOMED, INC. - 1220648			US		1283307		0042-0000-US		No			No		No	No	Health Professional			Manufacturer report
298	1220648-2026-03609	24393555	https://www.accessdata.fda.gov/scripts/cdrh/cfdocs/cfmaude/detail.cfm?mdrfoi__id=24393555&pc=OZD	02/12/2026			02/19/2026			02/12/2026	02/19/2026					02/19/2026		TEMPORARY NON-ROLLER TYPE LEFT HEART SUPPORT BLOOD PUMP			IMPELLA 5.5 WITH SMARTASSIST S2 SET, US			OZD						ABIOMED, INC. - 1220648			US		2026806925		1000100		No			No		Yes	No	Health Professional			Manufacturer report
299	1220648-2026-03612	24394120	https://www.accessdata.fda.gov/scripts/cdrh/cfdocs/cfmaude/detail.cfm?mdrfoi__id=24394120&pc=OZD	12/24/2025			02/19/2026			12/24/2025	02/19/2026					02/19/2026		TEMPORARY NON-ROLLER TYPE LEFT HEART SUPPORT BLOOD PUMP			IMPELLA 5.5 WITH SMARTASSIST S2 SET, US			OZD			IMPELLA 5.5 WITH SMARTASSIST S2 SET, US			ABIOMED, INC. - 1220648			US		2026635230		1000100		No			No		Yes	No	Health Professional			Manufacturer report
300	1220648-2026-03614	24396725	https://www.accessdata.fda.gov/scripts/cdrh/cfdocs/cfmaude/detail.cfm?mdrfoi__id=24396725&pc=OZD	10/28/2025			02/19/2026			10/28/2025	02/19/2026					02/19/2026		TEMPORARY NON-ROLLER TYPE LEFT HEART SUPPORT BLOOD PUMP			IMPELLA 5.5 WITH SMARTASSIST S2 SET, US			OZD						ABIOMED, INC. - 1220648			US		2026713917		000000000001000100		No			No		Yes	No	Health Professional			Manufacturer report
301	1220648-2026-03615	24397082	https://www.accessdata.fda.gov/scripts/cdrh/cfdocs/cfmaude/detail.cfm?mdrfoi__id=24397082&pc=OZD	02/12/2026			02/19/2026			02/12/2026	02/19/2026							TEMPORARY NON-ROLLER TYPE LEFT HEART SUPPORT BLOOD PUMP			IMPELLA 5.5 WITH SMARTASSIST S2 SET, US			OZD						ABIOMED, INC. - 1220648			US		2026701716		1000100		No			No		Yes	No	Health Professional			Manufacturer report
302	1220648-2026-03616	24397093	https://www.accessdata.fda.gov/scripts/cdrh/cfdocs/cfmaude/detail.cfm?mdrfoi__id=24397093&pc=OZD	02/12/2026			02/19/2026			02/12/2026	02/19/2026					02/19/2026		TEMPORARY NON-ROLLER TYPE LEFT HEART SUPPORT BLOOD PUMP			IMPELLA CONTROLLER, PACKAGED, US			OZD						ABIOMED, INC. - 1220648			US		1103511		0042-0000-US		Device was returned to manufacturer			No		No	No	Health Professional			Manufacturer report
303	1220648-2026-03617	24397254	https://www.accessdata.fda.gov/scripts/cdrh/cfdocs/cfmaude/detail.cfm?mdrfoi__id=24397254&pc=OZD	11/13/2025			02/19/2026			11/13/2025	02/19/2026					02/19/2026		TEMPORARY NON-ROLLER TYPE LEFT HEART SUPPORT BLOOD PUMP			IMPELLA CPSA C9+ SET, OUS			OZD						ABIOMED, INC.			US		2026757315		000000000001000851		No			No		Yes	No	Health Professional			Manufacturer report
304	1220648-2026-03618	24397406	https://www.accessdata.fda.gov/scripts/cdrh/cfdocs/cfmaude/detail.cfm?mdrfoi__id=24397406&pc=OZD	02/12/2026			02/19/2026			02/12/2026	02/19/2026					02/19/2026		TEMPORARY NON-ROLLER TYPE LEFT HEART SUPPORT BLOOD PUMP			IMPELLA 5.5 WITH SMARTASSIST S2 SET, US			OZD						ABIOMED, INC. - 1220648			US		2026805668		1000100		No			No		Yes	No	Health Professional			Manufacturer report
305	1220648-2026-03619	24397539	https://www.accessdata.fda.gov/scripts/cdrh/cfdocs/cfmaude/detail.cfm?mdrfoi__id=24397539&pc=OZD	02/12/2026			02/19/2026			02/12/2026	02/19/2026					02/19/2026		TEMPORARY NON-ROLLER TYPE LEFT HEART SUPPORT BLOOD PUMP			IMPELLA 5.5 WITH SMARTASSIST S2 SET, US			OZD						ABIOMED, INC. - 1220648			US		2026706423		1000100		No			No		Yes	No	Health Professional			Manufacturer report
306	1220648-2026-03621	24397887	https://www.accessdata.fda.gov/scripts/cdrh/cfdocs/cfmaude/detail.cfm?mdrfoi__id=24397887&pc=OZD	11/20/2025			02/19/2026			11/20/2025	02/19/2026					02/19/2026		TEMPORARY NON-ROLLER TYPE LEFT HEART SUPPORT BLOOD PUMP			IMPELLA 5.5 WITH SMARTASSIST S2 SET, US			OZD			IMPELLA 5.5 WITH SMARTASSIST S2 SET, US			ABIOMED, INC. - 1220648			US		2026713971		000000000001000100		No			No		Yes	No	Health Professional			Manufacturer report
307	1220648-2026-03622	24397890	https://www.accessdata.fda.gov/scripts/cdrh/cfdocs/cfmaude/detail.cfm?mdrfoi__id=24397890&pc=OZD	11/20/2025			02/19/2026			11/20/2025	02/19/2026							TEMPORARY NON-ROLLER TYPE LEFT HEART SUPPORT BLOOD PUMP			IMPELLA 5.5 WITH SMARTASSIST S2 SET, US			OZD			IMPELLA 5.5 WITH SMARTASSIST S2 SET, US			ABIOMED, INC. - 1220648			US		2026665967		000000000001000100		No			No		Yes	No	Health Professional			Manufacturer report
308	1220648-2026-03623	24397892	https://www.accessdata.fda.gov/scripts/cdrh/cfdocs/cfmaude/detail.cfm?mdrfoi__id=24397892&pc=OZD	11/20/2025			02/19/2026			11/20/2025	02/19/2026					02/19/2026		TEMPORARY NON-ROLLER TYPE LEFT HEART SUPPORT BLOOD PUMP			IMPELLA 5.5 WITH SMARTASSIST S2 SET, US			OZD			IMPELLA 5.5 WITH SMARTASSIST S2 SET, US			ABIOMED, INC. - 1220648			US		2026732628		000000000001000100		No			No		Yes	No	Health Professional			Manufacturer report
309	1220648-2026-03625	24397895	https://www.accessdata.fda.gov/scripts/cdrh/cfdocs/cfmaude/detail.cfm?mdrfoi__id=24397895&pc=OZD	11/21/2025			02/19/2026			11/21/2025	02/19/2026					02/19/2026		TEMPORARY NON-ROLLER TYPE LEFT HEART SUPPORT BLOOD PUMP			IMPELLA 5.5 WITH SMARTASSIST S2 SET, US			OZD			IMPELLA 5.5 WITH SMARTASSIST S2 SET, US			ABIOMED, INC. - 1220648			US		2026763791		000000000001000100		No			No		Yes	No	Health Professional			Manufacturer report
310	1220648-2026-03624	24397898	https://www.accessdata.fda.gov/scripts/cdrh/cfdocs/cfmaude/detail.cfm?mdrfoi__id=24397898&pc=OZD	11/20/2025			02/19/2026			11/20/2025	02/19/2026					02/19/2026		TEMPORARY NON-ROLLER TYPE LEFT HEART SUPPORT BLOOD PUMP			IMPELLA 5.5 WITH SMARTASSIST S2 SET, US			OZD			IMPELLA 5.5 WITH SMARTASSIST S2 SET, US			ABIOMED, INC. - 1220648			US		2026716019		000000000001000100		No			No		Yes	No	Health Professional			Manufacturer report
311	1220648-2026-03626	24397900	https://www.accessdata.fda.gov/scripts/cdrh/cfdocs/cfmaude/detail.cfm?mdrfoi__id=24397900&pc=OZD	11/22/2025			02/19/2026			11/22/2025	02/19/2026					02/19/2026		TEMPORARY NON-ROLLER TYPE LEFT HEART SUPPORT BLOOD PUMP			IMPELLA 5.5 WITH SMARTASSIST S2 SET, US			OZD			IMPELLA 5.5 WITH SMARTASSIST S2 SET, US			ABIOMED, INC. - 1220648			US		2026627369		000000000001000100		No			No		Yes	No	Health Professional			Manufacturer report
312	1220648-2026-03627	24397906	https://www.accessdata.fda.gov/scripts/cdrh/cfdocs/cfmaude/detail.cfm?mdrfoi__id=24397906&pc=OZD	11/23/2025			02/19/2026			11/23/2025	02/19/2026					02/19/2026		TEMPORARY NON-ROLLER TYPE LEFT HEART SUPPORT BLOOD PUMP			IMPELLA 5.5 WITH SMARTASSIST S2 SET, US			OZD			IMPELLA 5.5 WITH SMARTASSIST S2 SET, US			ABIOMED, INC. - 1220648			US		2026688383		000000000001000100		No			No		Yes	No	Health Professional			Manufacturer report
313	1220648-2026-03628	24397909	https://www.accessdata.fda.gov/scripts/cdrh/cfdocs/cfmaude/detail.cfm?mdrfoi__id=24397909&pc=OZD	11/24/2025			02/19/2026			11/24/2025	02/19/2026					02/19/2026		TEMPORARY NON-ROLLER TYPE LEFT HEART SUPPORT BLOOD PUMP			IMPELLA 5.5 WITH SMARTASSIST S2 SET, US			OZD			IMPELLA 5.5 WITH SMARTASSIST S2 SET, US			ABIOMED, INC. - 1220648			US		2026706531		000000000001000100		No			No		Yes	No	Health Professional			Manufacturer report
314	1220648-2026-03630	24397915	https://www.accessdata.fda.gov/scripts/cdrh/cfdocs/cfmaude/detail.cfm?mdrfoi__id=24397915&pc=OZD	11/24/2025			02/19/2026			11/24/2025	02/19/2026					02/19/2026		TEMPORARY NON-ROLLER TYPE LEFT HEART SUPPORT BLOOD PUMP			IMPELLA 5.5 WITH SMARTASSIST S2 SET, US			OZD			IMPELLA 5.5 WITH SMARTASSIST S2 SET, US			ABIOMED, INC. - 1220648			US		2026736378		000000000001000100		No			No		Yes	No	Health Professional			Manufacturer report
315	1220648-2026-03634	24397924	https://www.accessdata.fda.gov/scripts/cdrh/cfdocs/cfmaude/detail.cfm?mdrfoi__id=24397924&pc=OZD	11/24/2025			02/19/2026			11/24/2025	02/19/2026					02/19/2026		TEMPORARY NON-ROLLER TYPE LEFT HEART SUPPORT BLOOD PUMP			IMPELLA 5.5 WITH SMARTASSIST S2 SET, US			OZD			IMPELLA 5.5 WITH SMARTASSIST S2 SET, US			ABIOMED, INC. - 1220648			US		2026749871		000000000001000100		No			No		Yes	No	Health Professional			Manufacturer report
316	1220648-2026-03635	24397929	https://www.accessdata.fda.gov/scripts/cdrh/cfdocs/cfmaude/detail.cfm?mdrfoi__id=24397929&pc=OZD	11/24/2025			02/19/2026			11/24/2025	02/19/2026					02/19/2026		TEMPORARY NON-ROLLER TYPE LEFT HEART SUPPORT BLOOD PUMP			IMPELLA 5.5 WITH SMARTASSIST S2 SET, US			OZD			IMPELLA 5.5 WITH SMARTASSIST S2 SET, US			ABIOMED, INC. - 1220648			US		2026768607		000000000001000100		No			No		Yes	No	Health Professional			Manufacturer report
317	1220648-2026-03636	24397930	https://www.accessdata.fda.gov/scripts/cdrh/cfdocs/cfmaude/detail.cfm?mdrfoi__id=24397930&pc=OZD	11/24/2025			02/19/2026			11/24/2025	02/19/2026					02/19/2026		TEMPORARY NON-ROLLER TYPE LEFT HEART SUPPORT BLOOD PUMP			IMPELLA 5.5 WITH SMARTASSIST S2 SET, US			OZD			IMPELLA 5.5 WITH SMARTASSIST S2 SET, US			ABIOMED, INC. - 1220648			US		2026710430		000000000001000100		No			No		Yes	No	Health Professional			Manufacturer report
318	1220648-2026-03637	24397931	https://www.accessdata.fda.gov/scripts/cdrh/cfdocs/cfmaude/detail.cfm?mdrfoi__id=24397931&pc=OZD	11/24/2025			02/19/2026			11/24/2025	02/19/2026					02/19/2026		TEMPORARY NON-ROLLER TYPE LEFT HEART SUPPORT BLOOD PUMP			IMPELLA 5.5 WITH SMARTASSIST S2 SET, US			OZD			IMPELLA 5.5 WITH SMARTASSIST S2 SET, US			ABIOMED, INC. - 1220648			US		2026745726		000000000001000100		No			No		Yes	No	Health Professional			Manufacturer report
319	1220648-2026-03391	24376288	https://www.accessdata.fda.gov/scripts/cdrh/cfdocs/cfmaude/detail.cfm?mdrfoi__id=24376288&pc=OZD	02/10/2026			02/18/2026			02/10/2026	02/18/2026							TEMPORARY NON-ROLLER TYPE LEFT HEART SUPPORT BLOOD PUMP			OPTICAL, AIC, IMPELLA CONNECT, PKGD, US			OZD						ABIOMED, INC. - 1220648			US				0042-0040-US		Device was returned to manufacturer			No		No	No	Health Professional			Manufacturer report
320	1220648-2026-03401	24376614	https://www.accessdata.fda.gov/scripts/cdrh/cfdocs/cfmaude/detail.cfm?mdrfoi__id=24376614&pc=OZD	02/11/2026			02/18/2026			02/11/2026	02/18/2026					02/18/2026		TEMPORARY NON-ROLLER TYPE LEFT HEART SUPPORT BLOOD PUMP			IMPELLA OPTICAL CONTROLLER, PACKAGED, US			OZD						ABIOMED, INC. - 1220648			US		1431841		0042-0010-US		No			No		No	No	Health Professional			Manufacturer report
321	1220648-2026-03381	24376648	https://www.accessdata.fda.gov/scripts/cdrh/cfdocs/cfmaude/detail.cfm?mdrfoi__id=24376648&pc=OZD	10/16/2025			02/18/2026			10/16/2025	02/18/2026					02/18/2026		TEMPORARY NON-ROLLER TYPE LEFT HEART SUPPORT BLOOD PUMP			IMPELLA 5.5 WITH SMARTASSIST S2 SET, US			OZD			IMPELLA 5.5 WITH SMARTASSIST S2 SET, US			ABIOMED, INC. - 1220648			US		2026713132		000000000001000100		No			No		Yes	No	Health Professional			Manufacturer report
322	1220648-2026-03402	24376676	https://www.accessdata.fda.gov/scripts/cdrh/cfdocs/cfmaude/detail.cfm?mdrfoi__id=24376676&pc=OZD	02/10/2026			02/18/2026			02/10/2026	02/18/2026					02/18/2026		TEMPORARY NON-ROLLER TYPE LEFT HEART SUPPORT BLOOD PUMP			IMPELLA 5.5 WITH SMARTASSIST S2 SET, US			OZD						ABIOMED, INC. - 1220648			US		2026655834		000000000001000100		No			No		Yes	No	Health Professional			Manufacturer report
323	1220648-2026-03403	24376696	https://www.accessdata.fda.gov/scripts/cdrh/cfdocs/cfmaude/detail.cfm?mdrfoi__id=24376696&pc=OZD	02/11/2026			02/18/2026			02/11/2026	02/18/2026							TEMPORARY NON-ROLLER TYPE LEFT HEART SUPPORT BLOOD PUMP			IMPELLA 5.5 WITH SMARTASSIST S2 SET, US			OZD						ABIOMED, INC. - 1220648			US		2026757675		000000000001000100		No			No		Yes	No	Health Professional			Manufacturer report
324	1220648-2026-03405	24376793	https://www.accessdata.fda.gov/scripts/cdrh/cfdocs/cfmaude/detail.cfm?mdrfoi__id=24376793&pc=OZD	02/11/2026			02/18/2026			02/11/2026	02/18/2026					02/18/2026		TEMPORARY NON-ROLLER TYPE LEFT HEART SUPPORT BLOOD PUMP			IMPELLA 5.5 WITH SMARTASSIST S2 SET, US			OZD						ABIOMED, INC. - 1220648			US		2026801122		000000000001000100		No			No		Yes	No	Health Professional			Manufacturer report
325	1220648-2026-03407	24376816	https://www.accessdata.fda.gov/scripts/cdrh/cfdocs/cfmaude/detail.cfm?mdrfoi__id=24376816&pc=OZD	02/11/2026			02/18/2026			02/11/2026	02/18/2026							TEMPORARY NON-ROLLER TYPE LEFT HEART SUPPORT BLOOD PUMP			IMPELLA 5.5 WITH SMARTASSIST S2 SET, US			OZD						ABIOMED, INC. - 1220648			US		2026803212		000000000001000100		No			No		Yes	No	Health Professional			Manufacturer report
326	1220648-2026-03409	24376896	https://www.accessdata.fda.gov/scripts/cdrh/cfdocs/cfmaude/detail.cfm?mdrfoi__id=24376896&pc=OZD	02/06/2026			02/18/2026			02/10/2026	02/18/2026							TEMPORARY NON-ROLLER TYPE LEFT HEART SUPPORT BLOOD PUMP			OPTICAL, AIC, IMPELLA CONNECT, PKGD, US			OZD						ABIOMED, INC. - 1220648			US				0042-0040-US		No			No		No	No	Health Professional			Manufacturer report
327	1220648-2026-03411	24376959	https://www.accessdata.fda.gov/scripts/cdrh/cfdocs/cfmaude/detail.cfm?mdrfoi__id=24376959&pc=OZD	10/22/2025			02/18/2026			10/22/2025	02/18/2026					02/18/2026		TEMPORARY NON-ROLLER TYPE LEFT HEART SUPPORT BLOOD PUMP			IMPELLA 5.5 WITH SMARTASSIST S2 SET, US			OZD			IMPELLA 5.5 WITH SMARTASSIST S2 SET, US			ABIOMED, INC. - 1220648			US		2026635374		000000000001000100		No			No		Yes	No	Health Professional			Manufacturer report
328	1220648-2026-03412	24376960	https://www.accessdata.fda.gov/scripts/cdrh/cfdocs/cfmaude/detail.cfm?mdrfoi__id=24376960&pc=OZD	02/10/2026			02/18/2026			02/10/2026	02/18/2026					02/18/2026		TEMPORARY NON-ROLLER TYPE LEFT HEART SUPPORT BLOOD PUMP			IMPELLA CONTROLLER, PACKAGED, US			OZD						ABIOMED, INC. - 1220648			US		1123074		0042-0000-US		Device was returned to manufacturer			No		No	No	Health Professional			Manufacturer report
329	1220648-2026-03416	24377048	https://www.accessdata.fda.gov/scripts/cdrh/cfdocs/cfmaude/detail.cfm?mdrfoi__id=24377048&pc=OZD	02/11/2026			02/18/2026			02/11/2026	02/18/2026					02/18/2026		TEMPORARY NON-ROLLER TYPE LEFT HEART SUPPORT BLOOD PUMP			IMPELLA 5.5 WITH SMARTASSIST S2 SET, US			OZD						ABIOMED, INC. - 1220648			US		2026812357		000000000001000100		No			No		Yes	No	Health Professional			Manufacturer report
330	1220648-2026-03417	24377067	https://www.accessdata.fda.gov/scripts/cdrh/cfdocs/cfmaude/detail.cfm?mdrfoi__id=24377067&pc=OZD	02/12/2026			02/18/2026			02/12/2026	02/18/2026							TEMPORARY NON-ROLLER TYPE LEFT HEART SUPPORT BLOOD PUMP			IMPELLA 5.5 WITH SMARTASSIST S2 SET, US			OZD						ABIOMED, INC. - 1220648			US		2026814985		000000000001000100		No			No		Yes	No	Health Professional			Manufacturer report
331	1220648-2026-03418	24377107	https://www.accessdata.fda.gov/scripts/cdrh/cfdocs/cfmaude/detail.cfm?mdrfoi__id=24377107&pc=OZD	02/12/2026			02/18/2026			02/12/2026	02/18/2026					02/18/2026		TEMPORARY NON-ROLLER TYPE LEFT HEART SUPPORT BLOOD PUMP			IMPELLA 5.5 WITH SMARTASSIST S2 SET, US			OZD						ABIOMED, INC. - 1220648			US		2026747714		000000000001000100		Device was returned to manufacturer			No		Yes	No	Health Professional			Manufacturer report
332	1220648-2026-03423	24377222	https://www.accessdata.fda.gov/scripts/cdrh/cfdocs/cfmaude/detail.cfm?mdrfoi__id=24377222&pc=OZD	02/11/2026			02/18/2026			02/11/2026	02/18/2026					02/18/2026		TEMPORARY NON-ROLLER TYPE LEFT HEART SUPPORT BLOOD PUMP			IMPELLA 5.5 WITH SMARTASSIST S2 SET, US			OZD						ABIOMED, INC. - 1220648			US		2026753182		1000100		No			No		Yes	No	Health Professional			Manufacturer report
333	1220648-2026-03429	24377403	https://www.accessdata.fda.gov/scripts/cdrh/cfdocs/cfmaude/detail.cfm?mdrfoi__id=24377403&pc=OZD	02/11/2026			02/18/2026			02/11/2026	02/18/2026							TEMPORARY NON-ROLLER TYPE LEFT HEART SUPPORT BLOOD PUMP			IMPELLA 5.5 WITH SMARTASSIST S2 SET, US			OZD						ABIOMED, INC. - 1220648			US		2026785111		1000100		No			No		Yes	No	Health Professional			Manufacturer report
334	1220648-2026-03424	24377425	https://www.accessdata.fda.gov/scripts/cdrh/cfdocs/cfmaude/detail.cfm?mdrfoi__id=24377425&pc=OZD	02/08/2026	02/18/2026		02/18/2026			02/08/2026	02/18/2026							TEMPORARY NON-ROLLER TYPE LEFT HEART SUPPORT BLOOD PUMP			IMPELLA CPSA C9+ SET, OUS			OZD						ABIOMED, INC. - 1220648			US		2026751657		1000851		No			No		Yes	No	Health Professional			Manufacturer report
335	1220648-2026-03432	24377556	https://www.accessdata.fda.gov/scripts/cdrh/cfdocs/cfmaude/detail.cfm?mdrfoi__id=24377556&pc=OZD	02/11/2026			02/18/2026			02/11/2026	02/18/2026					02/18/2026		TEMPORARY NON-ROLLER TYPE LEFT HEART SUPPORT BLOOD PUMP			IMPELLA 5.5 WITH SMARTASSIST S2 SET, US			OZD						ABIOMED, INC. - 1220648			US		2026795369		1000100		No			No		Yes	No	Health Professional			Manufacturer report
336	1220648-2026-03439	24378042	https://www.accessdata.fda.gov/scripts/cdrh/cfdocs/cfmaude/detail.cfm?mdrfoi__id=24378042&pc=OZD	02/03/2026			02/18/2026			02/11/2026	02/18/2026					02/18/2026		TEMPORARY NON-ROLLER TYPE LEFT HEART SUPPORT BLOOD PUMP			IMPELLA CP SMART ASSIST SET, JP			OZD						ABIOMED, INC. - 1220648			US		2026731767		0048-0024-JP		No			No		Yes	No	Health Professional			Manufacturer report
337	1220648-2026-03443	24378586	https://www.accessdata.fda.gov/scripts/cdrh/cfdocs/cfmaude/detail.cfm?mdrfoi__id=24378586&pc=OZD	11/14/2025			02/18/2026			11/14/2025	02/18/2026					02/18/2026		TEMPORARY NON-ROLLER TYPE LEFT HEART SUPPORT BLOOD PUMP			IMPELLA 5.5 WITH SMARTASSIST S2 SET, US			OZD			IMPELLA 5.5 WITH SMARTASSIST S2 SET, US			ABIOMED, INC. - 1220648			US		2026745436		000000000001000100		No			No		Yes	No	Health Professional			Manufacturer report
338	1220648-2026-03444	24378600	https://www.accessdata.fda.gov/scripts/cdrh/cfdocs/cfmaude/detail.cfm?mdrfoi__id=24378600&pc=OZD	11/15/2025			02/18/2026			11/15/2025	02/18/2026					02/18/2026		TEMPORARY NON-ROLLER TYPE LEFT HEART SUPPORT BLOOD PUMP			IMPELLA 5.5 WITH SMARTASSIST S2 SET, US			OZD			IMPELLA 5.5 WITH SMARTASSIST S2 SET, US			ABIOMED, INC. - 1220648			US		2026745681		000000000001000100		No			No		Yes	No	Health Professional			Manufacturer report
339	1220648-2026-03447	24378627	https://www.accessdata.fda.gov/scripts/cdrh/cfdocs/cfmaude/detail.cfm?mdrfoi__id=24378627&pc=OZD	12/02/2025			02/18/2026			12/02/2025	02/18/2026					02/18/2026		TEMPORARY NON-ROLLER TYPE LEFT HEART SUPPORT BLOOD PUMP			IMPELLA 5.5 WITH SMARTASSIST S2 SET, US			OZD			IMPELLA 5.5 WITH SMARTASSIST S2 SET, US			ABIOMED, INC. - 1220648			US		2026768597		000000000001000100		No			No		Yes	No	Health Professional			Manufacturer report
340	1220648-2026-03451	24378750	https://www.accessdata.fda.gov/scripts/cdrh/cfdocs/cfmaude/detail.cfm?mdrfoi__id=24378750&pc=OZD	02/11/2026			02/18/2026			02/11/2026	02/18/2026					02/18/2026		TEMPORARY NON-ROLLER TYPE LEFT HEART SUPPORT BLOOD PUMP			IMPELLA 5.5 WITH SMARTASSIST S2 SET, US			OZD						ABIOMED, INC. - 1220648			US		2026796213		1000100		No			No		Yes	No	Health Professional			Manufacturer report
341	1220648-2026-03453	24378937	https://www.accessdata.fda.gov/scripts/cdrh/cfdocs/cfmaude/detail.cfm?mdrfoi__id=24378937&pc=OZD	12/02/2025			02/18/2026			12/02/2025	02/18/2026					02/18/2026		TEMPORARY NON-ROLLER TYPE LEFT HEART SUPPORT BLOOD PUMP			IMPELLA 5.5 WITH SMARTASSIST S2 SET, US			OZD			IMPELLA 5.5 WITH SMARTASSIST S2 SET, US			ABIOMED, INC. - 1220648			US		2026743378		000000000001000100		No			No		Yes	No	Health Professional			Manufacturer report
342	1220648-2026-03454	24378976	https://www.accessdata.fda.gov/scripts/cdrh/cfdocs/cfmaude/detail.cfm?mdrfoi__id=24378976&pc=OZD	12/01/2025			02/18/2026			12/02/2025	02/18/2026					02/18/2026		TEMPORARY NON-ROLLER TYPE LEFT HEART SUPPORT BLOOD PUMP			IMPELLA 5.5 WITH SMARTASSIST S2 SET, US			OZD			IMPELLA 5.5 WITH SMARTASSIST S2 SET, US			ABIOMED, INC. - 1220648			US		2026769377		000000000001000100		No			No		Yes	No	Health Professional			Manufacturer report
343	1220648-2026-03457	24379052	https://www.accessdata.fda.gov/scripts/cdrh/cfdocs/cfmaude/detail.cfm?mdrfoi__id=24379052&pc=OZD	12/02/2025			02/18/2026			12/02/2025	02/18/2026					02/18/2026		TEMPORARY NON-ROLLER TYPE LEFT HEART SUPPORT BLOOD PUMP			IMPELLA 5.5 WITH SMARTASSIST S2 SET, US			OZD			IMPELLA 5.5 WITH SMARTASSIST S2 SET, US			ABIOMED, INC. - 1220648			US		2026725268		000000000001000100		No			No		Yes	No	Health Professional			Manufacturer report
344	1220648-2026-03458	24379142	https://www.accessdata.fda.gov/scripts/cdrh/cfdocs/cfmaude/detail.cfm?mdrfoi__id=24379142&pc=OZD	02/12/2026			02/18/2026			02/11/2026	02/18/2026					02/18/2026		TEMPORARY NON-ROLLER TYPE LEFT HEART SUPPORT BLOOD PUMP			IMPELLA CONTROLLER, PACKAGED, US			OZD						ABIOMED, INC. - 1220648			US		1189530		0042-0000-US		No			No		No	No	Health Professional			Manufacturer report
345	1220648-2026-03461	24379156	https://www.accessdata.fda.gov/scripts/cdrh/cfdocs/cfmaude/detail.cfm?mdrfoi__id=24379156&pc=OZD	12/02/2025			02/18/2026			12/03/2025	02/18/2026							TEMPORARY NON-ROLLER TYPE LEFT HEART SUPPORT BLOOD PUMP			IMPELLA 5.5 WITH SMARTASSIST S2 SET, US			OZD			IMPELLA 5.5 WITH SMARTASSIST S2 SET, US			ABIOMED, INC. - 1220648			US		2026617711		000000000001000100		No			No		Yes	No	Health Professional			Manufacturer report
346	1220648-2026-03465	24379258	https://www.accessdata.fda.gov/scripts/cdrh/cfdocs/cfmaude/detail.cfm?mdrfoi__id=24379258&pc=OZD	02/08/2026			02/18/2026			02/08/2026	02/18/2026					02/18/2026		TEMPORARY NON-ROLLER TYPE LEFT HEART SUPPORT BLOOD PUMP			IMPELLA 5.5 WITH SMARTASSIST S2 SET, US			OZD						ABIOMED, INC. - 1220648			US		2026775462		1000100		No			No		Yes	No	Health Professional			Manufacturer report
347	1220648-2026-03466	24379348	https://www.accessdata.fda.gov/scripts/cdrh/cfdocs/cfmaude/detail.cfm?mdrfoi__id=24379348&pc=OZD	12/03/2025			02/18/2026			12/03/2025	02/18/2026					02/18/2026		TEMPORARY NON-ROLLER TYPE LEFT HEART SUPPORT BLOOD PUMP			IMPELLA 5.5 WITH SMARTASSIST S2 SET, US			OZD			IMPELLA 5.5 WITH SMARTASSIST S2 SET, US			ABIOMED, INC. - 1220648			US		2026765210		000000000001000100		No			No		Yes	No	Health Professional			Manufacturer report
348	1220648-2026-03467	24379460	https://www.accessdata.fda.gov/scripts/cdrh/cfdocs/cfmaude/detail.cfm?mdrfoi__id=24379460&pc=OZD	12/03/2025			02/18/2026			12/03/2025	02/18/2026					02/18/2026		TEMPORARY NON-ROLLER TYPE LEFT HEART SUPPORT BLOOD PUMP			IMPELLA 5.5 WITH SMARTASSIST S2 SET, US			OZD			IMPELLA 5.5 WITH SMARTASSIST S2 SET, US			ABIOMED, INC. - 1220648			US		2026772348		000000000001000100		No			No		Yes	No	Health Professional			Manufacturer report
349	1220648-2026-03469	24379524	https://www.accessdata.fda.gov/scripts/cdrh/cfdocs/cfmaude/detail.cfm?mdrfoi__id=24379524&pc=OZD	12/04/2025			02/18/2026			12/04/2025	02/18/2026					02/18/2026		TEMPORARY NON-ROLLER TYPE LEFT HEART SUPPORT BLOOD PUMP			IMPELLA CONTROLLER, PACKAGED, US			OZD			IMPELLA CONTROLLER, PACKAGED, US			ABIOMED, INC. - 1220648			US		1302710		0042-0000-US		No			No		No	No	Health Professional			Manufacturer report
350	1220648-2026-03471	24379634	https://www.accessdata.fda.gov/scripts/cdrh/cfdocs/cfmaude/detail.cfm?mdrfoi__id=24379634&pc=OZD	12/04/2025			02/18/2026			12/04/2025	02/18/2026					02/18/2026		TEMPORARY NON-ROLLER TYPE LEFT HEART SUPPORT BLOOD PUMP			IMPELLA 5.5 WITH SMARTASSIST S2 SET, US			OZD			IMPELLA 5.5 WITH SMARTASSIST S2 SET, US			ABIOMED, INC. - 1220648			US		2026753239		000000000001000100		No			No		Yes	No	Health Professional			Manufacturer report
351	1220648-2026-03476	24379866	https://www.accessdata.fda.gov/scripts/cdrh/cfdocs/cfmaude/detail.cfm?mdrfoi__id=24379866&pc=OZD	12/04/2025			02/18/2026			12/04/2025	02/18/2026					02/18/2026		TEMPORARY NON-ROLLER TYPE LEFT HEART SUPPORT BLOOD PUMP			IMPELLA 5.5 WITH SMARTASSIST S2 SET, US			OZD			IMPELLA 5.5 WITH SMARTASSIST S2 SET, US			ABIOMED, INC. - 1220648			US		2025547824		000000000001000100		No			No		Yes	No	Health Professional			Manufacturer report
352	1220648-2026-03478	24380029	https://www.accessdata.fda.gov/scripts/cdrh/cfdocs/cfmaude/detail.cfm?mdrfoi__id=24380029&pc=OZD	02/09/2026			02/18/2026			02/11/2026	02/18/2026					02/18/2026		TEMPORARY NON-ROLLER TYPE LEFT HEART SUPPORT BLOOD PUMP			IMPELLA OPTICAL CONTROLLER, PACKAGED, EU			OZD						ABIOMED, INC. - 1220648			US		1429644		0042-0010-EU		No			No		No	No	Health Professional			Manufacturer report
353	1220648-2026-03479	24380111	https://www.accessdata.fda.gov/scripts/cdrh/cfdocs/cfmaude/detail.cfm?mdrfoi__id=24380111&pc=OZD	10/06/2025			02/18/2026			10/06/2025	02/18/2026							TEMPORARY NON-ROLLER TYPE LEFT HEART SUPPORT BLOOD PUMP			OPTICAL, AIC, IMPELLA CONNECT, PKGD, US			OZD			OPTICAL, AIC, IMPELLA CONNECT, PKGD, US			ABIOMED, INC. - 1220648			US		1556637		0042-0040-US		No			No		No	No	Health Professional			Manufacturer report
354	1220648-2026-03485	24380505	https://www.accessdata.fda.gov/scripts/cdrh/cfdocs/cfmaude/detail.cfm?mdrfoi__id=24380505&pc=OZD	12/04/2025			02/18/2026			12/04/2025	02/18/2026					02/18/2026		TEMPORARY NON-ROLLER TYPE LEFT HEART SUPPORT BLOOD PUMP			IMPELLA 5.5 WITH SMARTASSIST S2 SET, US			OZD			IMPELLA 5.5 WITH SMARTASSIST S2 SET, US			ABIOMED, INC. - 1220648			US		2026677218		000000000001000100		No			No		Yes	No	Health Professional			Manufacturer report
355	1220648-2026-03487	24380577	https://www.accessdata.fda.gov/scripts/cdrh/cfdocs/cfmaude/detail.cfm?mdrfoi__id=24380577&pc=OZD	12/05/2025			02/18/2026			12/05/2025	02/18/2026							TEMPORARY NON-ROLLER TYPE LEFT HEART SUPPORT BLOOD PUMP			IMPELLA 5.5 WITH SMARTASSIST S2 SET, US			OZD			IMPELLA 5.5 WITH SMARTASSIST S2 SET, US			ABIOMED, INC. - 1220648			US		2026671967		000000000001000100		No			No		Yes	No	Health Professional			Manufacturer report
356	1220648-2026-03486	24380636	https://www.accessdata.fda.gov/scripts/cdrh/cfdocs/cfmaude/detail.cfm?mdrfoi__id=24380636&pc=PYX	10/04/2025			02/18/2026			10/07/2025	02/18/2026					02/18/2026		TEMPORARY NON-ROLLER TYPE RIGHT HEART SUPPORT BLOOD PUMP:			IMPELLA PUMP, RP-IJ, STERILE			PYX			IMPELLA PUMP, RP-IJ, STERILE			ABIOMED, INC. - 1220648			US		1928005		1000186		No			No		Yes	No	Health Professional			Manufacturer report
357	1220648-2026-03489	24380690	https://www.accessdata.fda.gov/scripts/cdrh/cfdocs/cfmaude/detail.cfm?mdrfoi__id=24380690&pc=OZD	02/11/2026			02/18/2026			02/11/2026	02/18/2026					02/18/2026		TEMPORARY NON-ROLLER TYPE LEFT HEART SUPPORT BLOOD PUMP			IMPELLA 5.5 WITH SMARTASSIST S2 SET, US			OZD						ABIOMED, INC. - 1220648			US		2026807964		1000100		No			No		Yes	No	Health Professional			Manufacturer report
358	1220648-2026-03491	24380750	https://www.accessdata.fda.gov/scripts/cdrh/cfdocs/cfmaude/detail.cfm?mdrfoi__id=24380750&pc=OZD	12/08/2025			02/18/2026			12/08/2025	02/18/2026							TEMPORARY NON-ROLLER TYPE LEFT HEART SUPPORT BLOOD PUMP			IMPELLA OPTICAL CONTROLLER, PACKAGED, US			OZD			IMPELLA OPTICAL CONTROLLER, PACKAGED, US			ABIOMED, INC. - 1220648			US		1417971		0042-0010-US		No			No		No	No	Health Professional			Manufacturer report
359	1220648-2026-03492	24380765	https://www.accessdata.fda.gov/scripts/cdrh/cfdocs/cfmaude/detail.cfm?mdrfoi__id=24380765&pc=OZD	02/10/2026			02/18/2026			02/11/2026	02/18/2026					02/18/2026		TEMPORARY NON-ROLLER TYPE LEFT HEART SUPPORT BLOOD PUMP			IMPELLA CONTROLLER, PACKAGED, US			OZD						ABIOMED, INC. - 1220648			US		1165516		0042-0000-US		No			No		No	No	Health Professional			Manufacturer report
360	1220648-2026-03495	24380916	https://www.accessdata.fda.gov/scripts/cdrh/cfdocs/cfmaude/detail.cfm?mdrfoi__id=24380916&pc=OZD	02/12/2026			02/18/2026			02/12/2026	02/18/2026					02/18/2026		TEMPORARY NON-ROLLER TYPE LEFT HEART SUPPORT BLOOD PUMP			IMPELLA 5.5 WITH SMARTASSIST S2 SET, US			OZD						ABIOMED, INC. - 1220648			US		2026710601		1000100		No			No		Yes	No	Health Professional			Manufacturer report
361	1220648-2026-03500	24381264	https://www.accessdata.fda.gov/scripts/cdrh/cfdocs/cfmaude/detail.cfm?mdrfoi__id=24381264&pc=OZD	12/03/2025			02/18/2026			12/03/2025	02/18/2026					02/18/2026		TEMPORARY NON-ROLLER TYPE LEFT HEART SUPPORT BLOOD PUMP			IMPELLA 5.5 WITH SMARTASSIST S2 SET, US			OZD			IMPELLA 5.5 WITH SMARTASSIST S2 SET, US			ABIOMED, INC. - 1220648			US		2026744145		000000000001000100		No			No		Yes	No	Health Professional			Manufacturer report
362	1220648-2026-03502	24381402	https://www.accessdata.fda.gov/scripts/cdrh/cfdocs/cfmaude/detail.cfm?mdrfoi__id=24381402&pc=OZD	12/04/2025			02/18/2026			12/04/2025	02/18/2026					02/18/2026		TEMPORARY NON-ROLLER TYPE LEFT HEART SUPPORT BLOOD PUMP			IMPELLA 5.5 WITH SMARTASSIST S2 SET, US			OZD			IMPELLA 5.5 WITH SMARTASSIST S2 SET, US			ABIOMED, INC. - 1220648			US		2026686642		000000000001000100		No			No		Yes	No	Health Professional			Manufacturer report
363	1220648-2026-03503	24381506	https://www.accessdata.fda.gov/scripts/cdrh/cfdocs/cfmaude/detail.cfm?mdrfoi__id=24381506&pc=OZD	12/03/2025			02/18/2026			12/04/2025	02/18/2026					02/18/2026		TEMPORARY NON-ROLLER TYPE LEFT HEART SUPPORT BLOOD PUMP			IMPELLA 5.5 WITH SMARTASSIST S2 SET, US			OZD			IMPELLA 5.5 WITH SMARTASSIST S2 SET, US			ABIOMED, INC. - 1220648			US		2026765817		000000000001000100		No			No		Yes	No	Health Professional			Manufacturer report
364	1220648-2026-03505	24381602	https://www.accessdata.fda.gov/scripts/cdrh/cfdocs/cfmaude/detail.cfm?mdrfoi__id=24381602&pc=OZD	01/20/2026			02/18/2026			01/20/2026	02/18/2026							TEMPORARY NON-ROLLER TYPE LEFT HEART SUPPORT BLOOD PUMP			IMPELLA 5.5 WITH SMARTASSIST S2 SET, US			OZD						ABIOMED, INC. - 1220648			US		2026766899		000000000001000100		No			No		Yes	No	Health Professional			Manufacturer report
365	1220648-2026-03248	24381649	https://www.accessdata.fda.gov/scripts/cdrh/cfdocs/cfmaude/detail.cfm?mdrfoi__id=24381649&pc=OZD	12/07/2025	02/16/2026		02/18/2026			12/07/2025	02/18/2026					02/18/2026		TEMPORARY NON-ROLLER TYPE LEFT HEART SUPPORT BLOOD PUMP			IMPELLA 5.5 WITH SMARTASSIST S2 SET, US			OZD			IMPELLA 5.5 WITH SMARTASSIST S2 SET, US			ABIOMED, INC. - 1220648			US		2026774650		000000000001000100		No			No		Yes	No	Health Professional			Manufacturer report
366	1220648-2026-03509	24384418	https://www.accessdata.fda.gov/scripts/cdrh/cfdocs/cfmaude/detail.cfm?mdrfoi__id=24384418&pc=OZD	02/07/2026			02/18/2026			02/07/2026	02/18/2026					02/18/2026		TEMPORARY NON-ROLLER TYPE LEFT HEART SUPPORT BLOOD PUMP			IMPELLA CONTROLLER, PACKAGED, US			OZD						ABIOMED, INC. - 1220648			US		1398229		0042-0000-US		No			No		No	No	Health Professional			Manufacturer report
367	1220648-2026-03516	24385050	https://www.accessdata.fda.gov/scripts/cdrh/cfdocs/cfmaude/detail.cfm?mdrfoi__id=24385050&pc=OZD	02/10/2026	02/18/2026		02/18/2026			02/10/2026	02/18/2026							TEMPORARY NON-ROLLER TYPE LEFT HEART SUPPORT BLOOD PUMP			IMPELLA 5.5 WITH SMARTASSIST S2 SET, US			OZD			IMPELLA 5.5 WITH SMARTASSIST S2 SET, US			ABIOMED, INC.			US		2026658659		1000100		No			No		Yes	No	Health Professional			Manufacturer report
368	1220648-2026-03518	24385104	https://www.accessdata.fda.gov/scripts/cdrh/cfdocs/cfmaude/detail.cfm?mdrfoi__id=24385104&pc=OZD	02/10/2026	02/18/2026		02/18/2026			02/10/2026	02/18/2026					02/18/2026		TEMPORARY NON-ROLLER TYPE LEFT HEART SUPPORT BLOOD PUMP			IMPELLA 5.5 WITH SMARTASSIST S2 SET, EU			OZD			IMPELLA 5.5 WITH SMARTASSIST S2 SET, EU			ABIOMED, INC.			US		2026802180		000000000001000482		No			No		Yes	No	Health Professional			Manufacturer report
369	1220648-2026-03527	24385190	https://www.accessdata.fda.gov/scripts/cdrh/cfdocs/cfmaude/detail.cfm?mdrfoi__id=24385190&pc=OZD	12/04/2025			02/18/2026			12/04/2025	02/18/2026					02/18/2026		TEMPORARY NON-ROLLER TYPE LEFT HEART SUPPORT BLOOD PUMP			IMPELLA 5.5 WITH SMARTASSIST S2 SET, US			OZD			IMPELLA 5.5 WITH SMARTASSIST S2 SET, US			ABIOMED, INC. - 1220648			US		2026741989		000000000001000100		No			No		Yes	No	Health Professional			Manufacturer report
370	1220648-2026-03529	24385208	https://www.accessdata.fda.gov/scripts/cdrh/cfdocs/cfmaude/detail.cfm?mdrfoi__id=24385208&pc=OZD	02/10/2026	02/18/2026		02/18/2026			02/10/2026	02/18/2026					02/18/2026		TEMPORARY NON-ROLLER TYPE LEFT HEART SUPPORT BLOOD PUMP			IMPELLA 5.5 WITH SMARTASSIST S2 SET, US			OZD			IMPELLA 5.5 WITH SMARTASSIST S2 SET, US			ABIOMED, INC.			US		2026730007		1000100		No			No		Yes	No	Health Professional			Manufacturer report
371	1220648-2026-03334	24363462	https://www.accessdata.fda.gov/scripts/cdrh/cfdocs/cfmaude/detail.cfm?mdrfoi__id=24363462&pc=OZD	02/06/2026			02/17/2026			02/06/2026	02/17/2026							TEMPORARY NON-ROLLER TYPE LEFT HEART SUPPORT BLOOD PUMP			IMPELLA 5.5 WITH SMARTASSIST S2 SET, US			OZD						ABIOMED, INC. - 1220648			US		2026614158		1000100		No			No		Yes	No	Health Professional			Manufacturer report
372	1220648-2026-03339	24363656	https://www.accessdata.fda.gov/scripts/cdrh/cfdocs/cfmaude/detail.cfm?mdrfoi__id=24363656&pc=OZD	02/06/2026			02/17/2026			02/07/2026	02/17/2026					02/17/2026		TEMPORARY NON-ROLLER TYPE LEFT HEART SUPPORT BLOOD PUMP			IMPELLA 5.5 WITH SMARTASSIST S2 SET, US			OZD						ABIOMED, INC. - 1220648			US		2026806198		1000100		No			No		Yes	No	Health Professional			Manufacturer report
373	1220648-2026-03341	24363886	https://www.accessdata.fda.gov/scripts/cdrh/cfdocs/cfmaude/detail.cfm?mdrfoi__id=24363886&pc=OZD	02/04/2026			02/17/2026			02/04/2026	02/17/2026					02/17/2026		TEMPORARY NON-ROLLER TYPE LEFT HEART SUPPORT BLOOD PUMP			IMPELLA CPSA C9+ SET, OUS			OZD						ABIOMED, INC. - 1220648			US		2026800113		1000851		No			No		Yes	No	Health Professional			Manufacturer report
374	1220648-2026-03343	24363957	https://www.accessdata.fda.gov/scripts/cdrh/cfdocs/cfmaude/detail.cfm?mdrfoi__id=24363957&pc=OZD	02/09/2026			02/17/2026			02/09/2026	02/17/2026					02/17/2026		TEMPORARY NON-ROLLER TYPE LEFT HEART SUPPORT BLOOD PUMP			IMPELLA 5.5 WITH SMARTASSIST S2 SET, US			OZD						ABIOMED, INC. - 1220648			US		2026703333		1000100		No			No		Yes	No	Health Professional			Manufacturer report
375	1220648-2026-03116	24364230	https://www.accessdata.fda.gov/scripts/cdrh/cfdocs/cfmaude/detail.cfm?mdrfoi__id=24364230&pc=OZD	02/04/2026			02/17/2026			02/05/2026	02/17/2026					02/17/2026		TEMPORARY NON-ROLLER TYPE LEFT HEART SUPPORT BLOOD PUMP			IMPELLA 5.5 WITH SMARTASSIST S2 SET, US			OZD						ABIOMED, INC. - 1220648			US		2026745453		1000100		No			No		Yes	No	Health Professional			Manufacturer report
376	1220648-2026-03350	24364291	https://www.accessdata.fda.gov/scripts/cdrh/cfdocs/cfmaude/detail.cfm?mdrfoi__id=24364291&pc=OZD	02/07/2026			02/17/2026			02/07/2026	02/17/2026							TEMPORARY NON-ROLLER TYPE LEFT HEART SUPPORT BLOOD PUMP			IMPELLA CPSA C9+ SET, OUS			OZD						ABIOMED, INC. - 1220648			US		2026803390		1000851		No			No		Yes	No	Health Professional			Manufacturer report
377	1220648-2026-03351	24364443	https://www.accessdata.fda.gov/scripts/cdrh/cfdocs/cfmaude/detail.cfm?mdrfoi__id=24364443&pc=OZD	12/22/2025			02/17/2026			12/22/2025	02/17/2026					02/17/2026		TEMPORARY NON-ROLLER TYPE LEFT HEART SUPPORT BLOOD PUMP			OPTICAL, AIC, IMPELLA CONNECT, PKGD, US			OZD			OPTICAL, AIC, IMPELLA CONNECT, PKGD, US			ABIOMED, INC. - 1220648			US				0042-0040-US		No			No		No	No	Health Professional			Manufacturer report
378	1220648-2026-03352	24364784	https://www.accessdata.fda.gov/scripts/cdrh/cfdocs/cfmaude/detail.cfm?mdrfoi__id=24364784&pc=OZD	02/07/2026			02/17/2026			02/07/2026	02/17/2026					02/17/2026		TEMPORARY NON-ROLLER TYPE LEFT HEART SUPPORT BLOOD PUMP			IMPELLA CONTROLLER, PACKAGED, US			OZD						ABIOMED, INC. - 1220648			US		1158010		0042-0000-US		Device was returned to manufacturer			No		No	No	Health Professional			Manufacturer report
379	1220648-2026-03355	24364961	https://www.accessdata.fda.gov/scripts/cdrh/cfdocs/cfmaude/detail.cfm?mdrfoi__id=24364961&pc=OZD	02/07/2026			02/17/2026			02/07/2026	02/17/2026					02/17/2026		TEMPORARY NON-ROLLER TYPE LEFT HEART SUPPORT BLOOD PUMP			IMPELLA 5.5 WITH SMARTASSIST S2 SET, US			OZD						ABIOMED, INC. - 1220648			US		2026801125		1000100		Device was returned to manufacturer			No		Yes	No	Health Professional			Manufacturer report
380	1220648-2026-03359	24365921	https://www.accessdata.fda.gov/scripts/cdrh/cfdocs/cfmaude/detail.cfm?mdrfoi__id=24365921&pc=OZD	12/22/2025			02/17/2026			12/22/2025	02/17/2026							TEMPORARY NON-ROLLER TYPE LEFT HEART SUPPORT BLOOD PUMP			IMPELLA CONTROLLER, PACKAGED, US			OZD			IMPELLA CONTROLLER, PACKAGED, US			ABIOMED, INC. - 1220648			US		1302104		0042-0000-US		No			No		No	No	Health Professional			Manufacturer report
381	1220648-2026-03363	24366682	https://www.accessdata.fda.gov/scripts/cdrh/cfdocs/cfmaude/detail.cfm?mdrfoi__id=24366682&pc=OZD	02/07/2026			02/17/2026			02/08/2026	02/17/2026					02/17/2026		TEMPORARY NON-ROLLER TYPE LEFT HEART SUPPORT BLOOD PUMP			IMPELLA 5.5 WITH SMARTASSIST S2 SET, US			OZD						ABIOMED, INC. - 1220648			US		2026811404		1000100		No			No		Yes	No	Health Professional			Manufacturer report
382	1220648-2026-03365	24367448	https://www.accessdata.fda.gov/scripts/cdrh/cfdocs/cfmaude/detail.cfm?mdrfoi__id=24367448&pc=OZD	02/02/2026	02/17/2026		02/17/2026			02/02/2026	02/17/2026							TEMPORARY NON-ROLLER TYPE LEFT HEART SUPPORT BLOOD PUMP			OPTICAL, AIC, IMPELLA CONNECT, PKGD, US			OZD			OPTICAL, AIC, IMPELLA CONNECT, PKGD, US			ABIOMED, INC. - 1220648			US		1620355		0042-0040-US		Device was returned to manufacturer			No		No	No	Health Professional			Manufacturer report
383	1220648-2026-03372	24368050	https://www.accessdata.fda.gov/scripts/cdrh/cfdocs/cfmaude/detail.cfm?mdrfoi__id=24368050&pc=OZD	12/27/2025			02/17/2026			12/28/2025	02/17/2026					02/17/2026		TEMPORARY NON-ROLLER TYPE LEFT HEART SUPPORT BLOOD PUMP			IMPELLA CP SMART ASSIST SET APAC			OZD			IMPELLA CP SMART ASSIST SET APAC			ABIOMED, INC. - 1220648			US		2026737673		0048-0047		No			No		Yes	No	Health Professional			Manufacturer report
384	1220648-2026-03374	24368527	https://www.accessdata.fda.gov/scripts/cdrh/cfdocs/cfmaude/detail.cfm?mdrfoi__id=24368527&pc=OZD	12/29/2025			02/17/2026			12/29/2025	02/17/2026							TEMPORARY NON-ROLLER TYPE LEFT HEART SUPPORT BLOOD PUMP			IMPELLA OPTICAL CONTROLLER, PACKAGED, EU			OZD			IMPELLA OPTICAL CONTROLLER, PACKAGED, EU			ABIOMED, INC. - 1220648			US		1301514		0042-0010-EU		Device was returned to manufacturer			No		No	No	Health Professional			Manufacturer report
385	1220648-2026-03373	24368816	https://www.accessdata.fda.gov/scripts/cdrh/cfdocs/cfmaude/detail.cfm?mdrfoi__id=24368816&pc=OZD	02/04/2026	02/17/2026		02/17/2026			02/08/2026	02/17/2026							TEMPORARY NON-ROLLER TYPE LEFT HEART SUPPORT BLOOD PUMP			IMPELLA 5.5 SMARTASSIST S2 SET, JP			OZD						ABIOMED, INC. - 1220648			US		2026720053		1000459		No			No		Yes	No	Health Professional			Manufacturer report
386	1220648-2026-03375	24369003	https://www.accessdata.fda.gov/scripts/cdrh/cfdocs/cfmaude/detail.cfm?mdrfoi__id=24369003&pc=OZD	12/27/2025			02/17/2026			12/29/2025	02/17/2026					02/17/2026		TEMPORARY NON-ROLLER TYPE LEFT HEART SUPPORT BLOOD PUMP			OPTICAL, AIC, IMPELLA CONNECT, PKGD, US			OZD			OPTICAL, AIC, IMPELLA CONNECT, PKGD, US			ABIOMED, INC. - 1220648			US		1636031		0042-0040-US		No			No		No	No	Health Professional			Manufacturer report
387	1220648-2026-03376	24369176	https://www.accessdata.fda.gov/scripts/cdrh/cfdocs/cfmaude/detail.cfm?mdrfoi__id=24369176&pc=OZD	12/30/2025			02/17/2026			12/30/2025	02/17/2026					02/17/2026		TEMPORARY NON-ROLLER TYPE LEFT HEART SUPPORT BLOOD PUMP			IMPELLA CP SMART ASSIST SET, EU			OZD			IMPELLA CP SMART ASSIST SET, EU			ABIOMED, INC. - 1220648			US		2026652239		0048-0014		No			No		Yes	No	Health Professional			Manufacturer report
388	1220648-2026-03382	24370438	https://www.accessdata.fda.gov/scripts/cdrh/cfdocs/cfmaude/detail.cfm?mdrfoi__id=24370438&pc=OZD	11/11/2025			02/17/2026			12/31/2025	02/17/2026							TEMPORARY NON-ROLLER TYPE LEFT HEART SUPPORT BLOOD PUMP			OPTICAL, AIC, IMPELLA CONNECT, PKGD, US			OZD			OPTICAL, AIC, IMPELLA CONNECT, PKGD, US			ABIOMED, INC. - 1220648			US		1882177		0042-0040-US		No			No		No	No	Health Professional			Manufacturer report
389	1220648-2026-03385	24373987	https://www.accessdata.fda.gov/scripts/cdrh/cfdocs/cfmaude/detail.cfm?mdrfoi__id=24373987&pc=OZD	11/24/2025			02/17/2026			11/24/2025	02/17/2026					02/17/2026		TEMPORARY NON-ROLLER TYPE LEFT HEART SUPPORT BLOOD PUMP			IMPELLA CP SMART ASSIST SET, EU			OZD			IMPELLA CP SMART ASSIST SET, EU			ABIOMED, INC.			US		2026670348		0048-0014		No			No		Yes	No	Health Professional			Manufacturer report
390	1220648-2026-03195	24344029	https://www.accessdata.fda.gov/scripts/cdrh/cfdocs/cfmaude/detail.cfm?mdrfoi__id=24344029&pc=OZD	02/08/2026	02/14/2026		02/16/2026			02/08/2026	02/16/2026							TEMPORARY NON-ROLLER TYPE LEFT HEART SUPPORT BLOOD PUMP			IMPELLA 5.5			OZD			IMPELLA 5.5			ABIOMED, INC. - 1220648			US		2026811402		1000100		No			No		Yes	No	Health Professional			Manufacturer report
391	1220648-2026-03197	24344090	https://www.accessdata.fda.gov/scripts/cdrh/cfdocs/cfmaude/detail.cfm?mdrfoi__id=24344090&pc=OZD	02/08/2026	02/14/2026		02/16/2026			02/08/2026	02/16/2026					02/16/2026		TEMPORARY NON-ROLLER TYPE LEFT HEART SUPPORT BLOOD PUMP			IMPELLA CP			OZD			IMPELLA CP			ABIOMED, INC. - 1220648			US		2026710458		0048-0045		No			No		Yes	No	Health Professional			Manufacturer report
392	1220648-2026-03198	24344117	https://www.accessdata.fda.gov/scripts/cdrh/cfdocs/cfmaude/detail.cfm?mdrfoi__id=24344117&pc=OZD	02/08/2026	02/14/2026		02/16/2026			02/08/2026	02/16/2026							TEMPORARY NON-ROLLER TYPE LEFT HEART SUPPORT BLOOD PUMP			IMPELLA 5.5			OZD			IMPELLA 5.5			ABIOMED, INC. - 1220648			US		2026798044		1000100		No			No		Yes	No	Health Professional			Manufacturer report
393	1220648-2026-03235	24344174	https://www.accessdata.fda.gov/scripts/cdrh/cfdocs/cfmaude/detail.cfm?mdrfoi__id=24344174&pc=OZD	11/06/2025			02/16/2026			11/06/2025	02/16/2026					02/16/2026		TEMPORARY NON-ROLLER TYPE LEFT HEART SUPPORT BLOOD PUMP			IMPELLA 5.5 WITH SMARTASSIST S2 SET, US			OZD			IMPELLA 5.5 WITH SMARTASSIST S2 SET, US			ABIOMED, INC. - 1220648			US		2026749972		1000100		No			No		Yes	No	Health Professional			Manufacturer report
394	1220648-2026-03236	24344209	https://www.accessdata.fda.gov/scripts/cdrh/cfdocs/cfmaude/detail.cfm?mdrfoi__id=24344209&pc=OZD	11/10/2025			02/16/2026			11/10/2025	02/16/2026					02/16/2026		TEMPORARY NON-ROLLER TYPE LEFT HEART SUPPORT BLOOD PUMP			IMPELLA 5.5 WITH SMARTASSIST S2 SET, US			OZD			IMPELLA 5.5 WITH SMARTASSIST S2 SET, US			ABIOMED, INC. - 1220648			US		2026729379		1000100		No			No		Yes	No	Health Professional			Manufacturer report
395	1220648-2026-03238	24344258	https://www.accessdata.fda.gov/scripts/cdrh/cfdocs/cfmaude/detail.cfm?mdrfoi__id=24344258&pc=OZD	10/31/2025	02/19/2026		02/16/2026			10/31/2025	02/16/2026							TEMPORARY NON-ROLLER TYPE LEFT HEART SUPPORT BLOOD PUMP			IMPELLA CONTROLLER, PACKAGED, US			OZD			IMPELLA CONTROLLER, PACKAGED, US			ABIOMED, INC. - 1220648			US		1338086		0042-0000-US		No			No		No	No	Health Professional			Manufacturer report
396	1220648-2026-03241	24344333	https://www.accessdata.fda.gov/scripts/cdrh/cfdocs/cfmaude/detail.cfm?mdrfoi__id=24344333&pc=OZD	12/05/2025			02/16/2026			12/05/2025	02/16/2026					02/16/2026		TEMPORARY NON-ROLLER TYPE LEFT HEART SUPPORT BLOOD PUMP			IMPELLA 5.5 WITH SMARTASSIST S2 SET, US			OZD			IMPELLA 5.5 WITH SMARTASSIST S2 SET, US			ABIOMED, INC. - 1220648			US		2026728824		000000000001000100		No			No		Yes	No	Health Professional			Manufacturer report
397	1220648-2026-03243	24344401	https://www.accessdata.fda.gov/scripts/cdrh/cfdocs/cfmaude/detail.cfm?mdrfoi__id=24344401&pc=OZD	12/15/2024			02/16/2026			12/05/2025	02/16/2026					02/16/2026		TEMPORARY NON-ROLLER TYPE LEFT HEART SUPPORT BLOOD PUMP			IMPELLA 5.5 WITH SMARTASSIST S2 SET, US			OZD			IMPELLA 5.5 WITH SMARTASSIST S2 SET, US			ABIOMED, INC. - 1220648			US		2025564031		000000000001000100		No			No		Yes	No	Health Professional			Manufacturer report
398	1220648-2026-03242	24344408	https://www.accessdata.fda.gov/scripts/cdrh/cfdocs/cfmaude/detail.cfm?mdrfoi__id=24344408&pc=OZD	02/08/2026			02/16/2026			02/08/2026	02/16/2026							TEMPORARY NON-ROLLER TYPE LEFT HEART SUPPORT BLOOD PUMP			IMPELLA CP			OZD			IMPELLA CP			ABIOMED, INC. - 1220648			US		2026773857		1000080		No			No		Yes	No	Health Professional			Manufacturer report
399	1220648-2026-03245	24344476	https://www.accessdata.fda.gov/scripts/cdrh/cfdocs/cfmaude/detail.cfm?mdrfoi__id=24344476&pc=OZD	02/07/2026			02/16/2026			02/09/2026	02/16/2026					02/16/2026		TEMPORARY NON-ROLLER TYPE LEFT HEART SUPPORT BLOOD PUMP			IMPELLA 5.5 WITH SMARTASSIST S2 SET, US			OZD						ABIOMED, INC. - 1220648			US		2026615106		1000100		No			No		Yes	No	Health Professional			Manufacturer report
400	1220648-2026-03249	24344614	https://www.accessdata.fda.gov/scripts/cdrh/cfdocs/cfmaude/detail.cfm?mdrfoi__id=24344614&pc=OZD	12/07/2025			02/16/2026			12/07/2025	02/16/2026					02/16/2026		TEMPORARY NON-ROLLER TYPE LEFT HEART SUPPORT BLOOD PUMP			IMPELLA 5.5 WITH SMARTASSIST S2 SET, US			OZD			IMPELLA 5.5 WITH SMARTASSIST S2 SET, US			ABIOMED, INC. - 1220648			US		2026775991		000000000001000100		No			No		Yes	No	Health Professional			Manufacturer report
401	1220648-2026-03250	24344671	https://www.accessdata.fda.gov/scripts/cdrh/cfdocs/cfmaude/detail.cfm?mdrfoi__id=24344671&pc=OZD	11/29/2025			02/16/2026			11/29/2025	02/16/2026					02/16/2026		TEMPORARY NON-ROLLER TYPE LEFT HEART SUPPORT BLOOD PUMP			IMPELLA 5.5 WITH SMARTASSIST S2 SET, US			OZD			IMPELLA 5.5 WITH SMARTASSIST S2 SET, US			ABIOMED, INC. - 1220648			US		2026736482		000000000001000100		No			No		Yes	No	Health Professional			Manufacturer report
402	1220648-2026-03255	24344858	https://www.accessdata.fda.gov/scripts/cdrh/cfdocs/cfmaude/detail.cfm?mdrfoi__id=24344858&pc=OZD	02/09/2026			02/16/2026			02/09/2026	02/16/2026					02/16/2026		TEMPORARY NON-ROLLER TYPE LEFT HEART SUPPORT BLOOD PUMP			IMPELLA 5.5 WITH SMARTASSIST S2 SET, US			OZD						ABIOMED, INC. - 1220648			US		2026802332		1000100		No			No		Yes	No	Health Professional			Manufacturer report
403	1220648-2026-03258	24345040	https://www.accessdata.fda.gov/scripts/cdrh/cfdocs/cfmaude/detail.cfm?mdrfoi__id=24345040&pc=OZD	02/08/2026			02/16/2026			02/08/2026	02/16/2026					02/16/2026		TEMPORARY NON-ROLLER TYPE LEFT HEART SUPPORT BLOOD PUMP			OPTICAL, AIC, IMPELLA CONNECT, PKGD, US			OZD						ABIOMED, INC. - 1220648			US		1390968		0042-0040-US		No			No		No	No	Health Professional			Manufacturer report
404	1220648-2026-03259	24345205	https://www.accessdata.fda.gov/scripts/cdrh/cfdocs/cfmaude/detail.cfm?mdrfoi__id=24345205&pc=OZD	02/08/2026			02/16/2026			02/08/2026	02/16/2026					02/16/2026		TEMPORARY NON-ROLLER TYPE LEFT HEART SUPPORT BLOOD PUMP			IMPELLA CONTROLLER, PACKAGED, US			OZD						ABIOMED, INC. - 1220648			US		1350280		0042-0000-US		No			No		No	No	Health Professional			Manufacturer report
405	1220648-2026-03262	24345294	https://www.accessdata.fda.gov/scripts/cdrh/cfdocs/cfmaude/detail.cfm?mdrfoi__id=24345294&pc=OZD	09/26/2025			02/16/2026			09/26/2025	02/16/2026					02/16/2026		TEMPORARY NON-ROLLER TYPE LEFT HEART SUPPORT BLOOD PUMP			OPTICAL, AIC, IMPELLA CONNECT, PKGD, US			OZD						ABIOMED, INC.			US		1461907		0042-0040-US		No			No		No	No	Health Professional			Manufacturer report
406	1220648-2026-03268	24345488	https://www.accessdata.fda.gov/scripts/cdrh/cfdocs/cfmaude/detail.cfm?mdrfoi__id=24345488&pc=OZD	02/10/2026			02/16/2026			02/10/2026	02/16/2026					02/16/2026		TEMPORARY NON-ROLLER TYPE LEFT HEART SUPPORT BLOOD PUMP			IMPELLA 5.5 WITH SMARTASSIST S2 SET, US			OZD						ABIOMED, INC. - 1220648			US		2026738753		1000100		No			No		Yes	No	Health Professional			Manufacturer report
407	1220648-2026-03271	24345585	https://www.accessdata.fda.gov/scripts/cdrh/cfdocs/cfmaude/detail.cfm?mdrfoi__id=24345585&pc=OZD	02/10/2026			02/16/2026			02/10/2026	02/16/2026					02/16/2026		TEMPORARY NON-ROLLER TYPE LEFT HEART SUPPORT BLOOD PUMP			OPTICAL, AIC, IMPELLA CONNECT, PKGD, US			OZD						ABIOMED, INC. - 1220648			US		1599846		0042-0040-US		No			No		No	No	Health Professional			Manufacturer report
408	1220648-2026-03276	24346965	https://www.accessdata.fda.gov/scripts/cdrh/cfdocs/cfmaude/detail.cfm?mdrfoi__id=24346965&pc=OZD	12/08/2025			02/16/2026			12/08/2025	02/16/2026					02/16/2026		TEMPORARY NON-ROLLER TYPE LEFT HEART SUPPORT BLOOD PUMP			IMPELLA 5.5 WITH SMARTASSIST S2 SET, US			OZD			IMPELLA 5.5 WITH SMARTASSIST S2 SET, US			ABIOMED, INC. - 1220648			US		2026770412		1000100		No			No		Yes	No	Health Professional			Manufacturer report
409	1220648-2026-03277	24346993	https://www.accessdata.fda.gov/scripts/cdrh/cfdocs/cfmaude/detail.cfm?mdrfoi__id=24346993&pc=OZD	12/03/2025			02/16/2026			12/03/2025	02/16/2026							TEMPORARY NON-ROLLER TYPE LEFT HEART SUPPORT BLOOD PUMP			IMPELLA 5.5 WITH SMARTASSIST S2 SET, US			OZD			IMPELLA 5.5 WITH SMARTASSIST S2 SET, US			ABIOMED, INC. - 1220648			US		2026774635		000000000001000100		No			No		Yes	No	Health Professional			Manufacturer report
410	1220648-2026-03280	24348308	https://www.accessdata.fda.gov/scripts/cdrh/cfdocs/cfmaude/detail.cfm?mdrfoi__id=24348308&pc=OZD	04/17/2025			02/16/2026			12/09/2025	02/16/2026					02/16/2026		TEMPORARY NON-ROLLER TYPE LEFT HEART SUPPORT BLOOD PUMP			IMPELLA 5.5 WITH SMARTASSIST S2 SET, US			OZD			IMPELLA 5.5 WITH SMARTASSIST S2 SET, US			ABIOMED, INC. - 1220648			US		2025585330		1000100		No			No		Yes	No	Health Professional			Manufacturer report
411	1220648-2026-03281	24348620	https://www.accessdata.fda.gov/scripts/cdrh/cfdocs/cfmaude/detail.cfm?mdrfoi__id=24348620&pc=OZD	12/09/2025			02/16/2026			12/10/2025	02/16/2026					02/16/2026		TEMPORARY NON-ROLLER TYPE LEFT HEART SUPPORT BLOOD PUMP			IMPELLA 5.5 WITH SMARTASSIST S2 SET, EU			OZD			IMPELLA 5.5 WITH SMARTASSIST S2 SET, EU			ABIOMED, INC. - 1220648			US		2026760783		1000482		No			No		Yes	No	Health Professional			Manufacturer report
412	1220648-2026-03282	24348636	https://www.accessdata.fda.gov/scripts/cdrh/cfdocs/cfmaude/detail.cfm?mdrfoi__id=24348636&pc=OZD	02/09/2026			02/16/2026			02/10/2026	02/16/2026					02/16/2026		TEMPORARY NON-ROLLER TYPE LEFT HEART SUPPORT BLOOD PUMP			OPTICAL, AIC, IMPELLA CONNECT, PKGD, US			OZD						ABIOMED, INC. - 1220648			US		1347548		0042-0040-US		No			No		No	No	Health Professional			Manufacturer report
413	1220648-2026-03285	24349487	https://www.accessdata.fda.gov/scripts/cdrh/cfdocs/cfmaude/detail.cfm?mdrfoi__id=24349487&pc=OZD	05/31/2025			02/16/2026			05/31/2025	02/16/2026							TEMPORARY NON-ROLLER TYPE LEFT HEART SUPPORT BLOOD PUMP			IMPELLA 5.5 WITH SMARTASSIST S2 SET, US			OZD			IMPELLA 5.5 WITH SMARTASSIST S2 SET, US			ABIOMED, INC. - 1220648			US		2026676225		000000000001000100		No			No		Yes	No	Health Professional			Manufacturer report
414	1220648-2026-03287	24349613	https://www.accessdata.fda.gov/scripts/cdrh/cfdocs/cfmaude/detail.cfm?mdrfoi__id=24349613&pc=OZD	12/17/2025			02/16/2026			12/17/2025	02/16/2026					02/16/2026		TEMPORARY NON-ROLLER TYPE LEFT HEART SUPPORT BLOOD PUMP			IMPELLA 5.5 WITH SMARTASSIST S2 SET, US			OZD			IMPELLA 5.5 WITH SMARTASSIST S2 SET, US			ABIOMED, INC. - 1220648			US		2026775779		1000100		No			No		Yes	No	Health Professional			Manufacturer report
415	1220648-2026-03289	24349630	https://www.accessdata.fda.gov/scripts/cdrh/cfdocs/cfmaude/detail.cfm?mdrfoi__id=24349630&pc=OZD	12/04/2025			02/16/2026			12/04/2025	02/16/2026					02/16/2026		TEMPORARY NON-ROLLER TYPE LEFT HEART SUPPORT BLOOD PUMP			IMPELLA 5.5 WITH SMARTASSIST S2 SET, US			OZD			IMPELLA 5.5 WITH SMARTASSIST S2 SET, US			ABIOMED, INC. - 1220648			US		2026737494		000000000001000100		No			No		Yes	No	Health Professional			Manufacturer report
416	1220648-2026-03290	24349734	https://www.accessdata.fda.gov/scripts/cdrh/cfdocs/cfmaude/detail.cfm?mdrfoi__id=24349734&pc=OZD	12/04/2025			02/16/2026			12/04/2025	02/16/2026					02/16/2026		TEMPORARY NON-ROLLER TYPE LEFT HEART SUPPORT BLOOD PUMP			IMPELLA 5.5 WITH SMARTASSIST S2 SET, US			OZD			IMPELLA 5.5 WITH SMARTASSIST S2 SET, US			ABIOMED, INC. - 1220648			US		2026765218		000000000001000100		No			No		Yes	No	Health Professional			Manufacturer report
417	1220648-2026-03292	24349812	https://www.accessdata.fda.gov/scripts/cdrh/cfdocs/cfmaude/detail.cfm?mdrfoi__id=24349812&pc=OZD	12/05/2025			02/16/2026			12/05/2025	02/16/2026							TEMPORARY NON-ROLLER TYPE LEFT HEART SUPPORT BLOOD PUMP			IMPELLA 5.5 WITH SMARTASSIST S2 SET, US			OZD			IMPELLA 5.5 WITH SMARTASSIST S2 SET, US			ABIOMED, INC. - 1220648			US		2026746977		000000000001000100		No			No		Yes	No	Health Professional			Manufacturer report
418	1220648-2026-03296	24349984	https://www.accessdata.fda.gov/scripts/cdrh/cfdocs/cfmaude/detail.cfm?mdrfoi__id=24349984&pc=OZD	12/06/2025			02/16/2026			12/06/2025	02/16/2026					02/16/2026		TEMPORARY NON-ROLLER TYPE LEFT HEART SUPPORT BLOOD PUMP			IMPELLA 5.5 WITH SMARTASSIST S2 SET, US			OZD			IMPELLA 5.5 WITH SMARTASSIST S2 SET, US			ABIOMED, INC. - 1220648			US		2026779706		000000000001000100		No			No		Yes	No	Health Professional			Manufacturer report
419	1220648-2026-03297	24350201	https://www.accessdata.fda.gov/scripts/cdrh/cfdocs/cfmaude/detail.cfm?mdrfoi__id=24350201&pc=OZD	12/17/2025			02/16/2026			12/17/2025	02/16/2026							TEMPORARY NON-ROLLER TYPE LEFT HEART SUPPORT BLOOD PUMP			IMPELLA 5.5 WITH SMARTASSIST S2 SET, US			OZD			IMPELLA 5.5 WITH SMARTASSIST S2 SET, US			ABIOMED, INC. - 1220648			US		2026745766		1000100		No			No		Yes	No	Health Professional			Manufacturer report
420	1220648-2026-03300	24350559	https://www.accessdata.fda.gov/scripts/cdrh/cfdocs/cfmaude/detail.cfm?mdrfoi__id=24350559&pc=OZD	12/17/2025			02/16/2026			12/17/2025	02/16/2026					02/16/2026		TEMPORARY NON-ROLLER TYPE LEFT HEART SUPPORT BLOOD PUMP			IMPELLA 5.5 WITH SMARTASSIST S2 SET, US			OZD			IMPELLA 5.5 WITH SMARTASSIST S2 SET, US			ABIOMED, INC. - 1220648			US		2026775971		1000100		No			No		Yes	No	Health Professional			Manufacturer report
421	1220648-2026-03301	24350772	https://www.accessdata.fda.gov/scripts/cdrh/cfdocs/cfmaude/detail.cfm?mdrfoi__id=24350772&pc=OZD	12/20/2025			02/16/2026			12/20/2025	02/16/2026							TEMPORARY NON-ROLLER TYPE LEFT HEART SUPPORT BLOOD PUMP			IMPELLA CONTROLLER, PACKAGED, US			OZD			IMPELLA CONTROLLER, PACKAGED, US			ABIOMED, INC. - 1220648			US		1078703		0042-0000-US		Device was returned to manufacturer			No		No	No	Health Professional			Manufacturer report
422	1220648-2026-03303	24351044	https://www.accessdata.fda.gov/scripts/cdrh/cfdocs/cfmaude/detail.cfm?mdrfoi__id=24351044&pc=OZD	12/06/2025			02/16/2026			12/06/2025	02/16/2026					02/16/2026		TEMPORARY NON-ROLLER TYPE LEFT HEART SUPPORT BLOOD PUMP			IMPELLA 5.5 WITH SMARTASSIST S2 SET, US			OZD			IMPELLA 5.5 WITH SMARTASSIST S2 SET, US			ABIOMED, INC. - 1220648			US		2026775821		000000000001000100		No			No		Yes	No	Health Professional			Manufacturer report
423	1220648-2026-03309	24352483	https://www.accessdata.fda.gov/scripts/cdrh/cfdocs/cfmaude/detail.cfm?mdrfoi__id=24352483&pc=OZD	02/03/2026	02/16/2026		02/16/2026			02/04/2026	02/16/2026					02/16/2026		TEMPORARY NON-ROLLER TYPE LEFT HEART SUPPORT BLOOD PUMP			IMPELLA CONTROLLER, PACKAGED, EU			OZD			IMPELLA CONTROLLER, PACKAGED, EU			ABIOMED, INC.			US		1154178		0042-0000-EU		No			No		No	No	Health Professional			Manufacturer report
424	1220648-2026-03317	24354689	https://www.accessdata.fda.gov/scripts/cdrh/cfdocs/cfmaude/detail.cfm?mdrfoi__id=24354689&pc=PYX	10/21/2025			02/16/2026			10/21/2025	02/16/2026					02/16/2026		TEMPORARY NON-ROLLER TYPE RIGHT HEART SUPPORT BLOOD PUMP			IMPELLA PUMP, RP-IJ, STERILE			PYX						ABIOMED, INC.			US		1922345		000000000001000186		No			No		Yes	No	Health Professional			Manufacturer report
425	1220648-2026-03319	24355127	https://www.accessdata.fda.gov/scripts/cdrh/cfdocs/cfmaude/detail.cfm?mdrfoi__id=24355127&pc=OZD	02/08/2026	02/25/2026		02/16/2026			02/08/2026	02/16/2026					02/16/2026		TEMPORARY NON-ROLLER TYPE LEFT HEART SUPPORT BLOOD PUMP			IMPELLA CONTROLLER, PACKAGED, US			OZD						ABIOMED, INC.			US		1276707		0042-0000-US		No			No		No	No	Health Professional			Manufacturer report
426	1220648-2026-03323	24356368	https://www.accessdata.fda.gov/scripts/cdrh/cfdocs/cfmaude/detail.cfm?mdrfoi__id=24356368&pc=OZD	02/09/2026	02/16/2026		02/16/2026			02/09/2026	02/16/2026					02/16/2026		TEMPORARY NON-ROLLER TYPE LEFT HEART SUPPORT BLOOD PUMP			OPTICAL, AIC, IMPELLA CONNECT, PKGD, US			OZD			OPTICAL, AIC, IMPELLA CONNECT, PKGD, US			ABIOMED, INC.			US		1648111		0042-0040-US		No			No		No	No	Health Professional			Manufacturer report
427	1220648-2026-03327	24357172	https://www.accessdata.fda.gov/scripts/cdrh/cfdocs/cfmaude/detail.cfm?mdrfoi__id=24357172&pc=OZD	02/09/2026	02/16/2026		02/16/2026			02/09/2026	02/16/2026							TEMPORARY NON-ROLLER TYPE LEFT HEART SUPPORT BLOOD PUMP			OPTICAL, AIC, IMPELLA CONNECT, PKGD, US			OZD			OPTICAL, AIC, IMPELLA CONNECT, PKGD, US			ABIOMED, INC.			US		1997618		0042-0040-US		No			No		No	No	Health Professional			Manufacturer report
428	1220648-2026-03332	24358143	https://www.accessdata.fda.gov/scripts/cdrh/cfdocs/cfmaude/detail.cfm?mdrfoi__id=24358143&pc=PYX	10/22/2025			02/16/2026			10/22/2025	02/16/2026					02/16/2026		TEMPORARY NON-ROLLER TYPE LEFT HEART SUPPORT BLOOD PUMP			IMPELLA PUMP, RP-IJ, STERILE			PYX						ABIOMED, INC.			US		1922354		000000000001000186		No			No		Yes	No	Health Professional			Manufacturer report
429	1220648-2026-03201	24341398	https://www.accessdata.fda.gov/scripts/cdrh/cfdocs/cfmaude/detail.cfm?mdrfoi__id=24341398&pc=OZD	12/29/2025			02/15/2026			12/29/2025	02/15/2026					02/15/2026		TEMPORARY NON-ROLLER TYPE LEFT HEART SUPPORT BLOOD PUMP			IMPELLA 5.5 WITH SMARTASSIST S2 SET, US			OZD			IMPELLA 5.5 WITH SMARTASSIST S2 SET, US			ABIOMED, INC. - 1220648			US		2026780217		000000000001000100		No			No		Yes	No	Health Professional			Manufacturer report
430	1220648-2026-03202	24341528	https://www.accessdata.fda.gov/scripts/cdrh/cfdocs/cfmaude/detail.cfm?mdrfoi__id=24341528&pc=OZD	02/10/2026	02/15/2026		02/15/2026			02/10/2026	02/15/2026							TEMPORARY NON-ROLLER TYPE LEFT HEART SUPPORT BLOOD PUMP			IMPELLA 5.5 WITH SMARTASSIST S2 SET, US			OZD			IMPELLA 5.5 WITH SMARTASSIST S2 SET, US			ABIOMED, INC.			US		2026802423		1000100		No			No		Yes	No	Health Professional			Manufacturer report
431	1220648-2026-03203	24341530	https://www.accessdata.fda.gov/scripts/cdrh/cfdocs/cfmaude/detail.cfm?mdrfoi__id=24341530&pc=OZD	10/30/2025	02/20/2026		02/15/2026			11/06/2025	02/15/2026					02/15/2026		TEMPORARY NON-ROLLER TYPE LEFT HEART SUPPORT BLOOD PUMP			IMPELLA 5.5 WITH SMARTASSIST S2 SET, US			OZD			IMPELLA 5.5 WITH SMARTASSIST S2 SET, US			ABIOMED, INC.			US		2026688943		1000100		No			No		Yes	No	Health Professional			Manufacturer report
432	1220648-2026-03204	24341533	https://www.accessdata.fda.gov/scripts/cdrh/cfdocs/cfmaude/detail.cfm?mdrfoi__id=24341533&pc=OZD	11/06/2025	02/15/2026		02/15/2026			11/06/2025	02/15/2026					02/15/2026		TEMPORARY NON-ROLLER TYPE LEFT HEART SUPPORT BLOOD PUMP			IMPELLA 5.5 WITH SMARTASSIST S2 SET, US			OZD			IMPELLA 5.5 WITH SMARTASSIST S2 SET, US			ABIOMED, INC.			US		2026745075		1000100		No			No		Yes	No	Health Professional			Manufacturer report
433	1220648-2026-03206	24341536	https://www.accessdata.fda.gov/scripts/cdrh/cfdocs/cfmaude/detail.cfm?mdrfoi__id=24341536&pc=OZD	11/07/2025	02/15/2026		02/15/2026			11/07/2025	02/15/2026					02/15/2026		TEMPORARY NON-ROLLER TYPE LEFT HEART SUPPORT BLOOD PUMP			IMPELLA 5.5 WITH SMARTASSIST S2 SET, US			OZD			IMPELLA 5.5 WITH SMARTASSIST S2 SET, US			ABIOMED, INC.			US		2026655240		1000100		No			No		Yes	No	Health Professional			Manufacturer report
434	1220648-2026-03207	24341537	https://www.accessdata.fda.gov/scripts/cdrh/cfdocs/cfmaude/detail.cfm?mdrfoi__id=24341537&pc=OZD	11/09/2025	02/15/2026		02/15/2026			11/09/2025	02/15/2026					02/15/2026		TEMPORARY NON-ROLLER TYPE LEFT HEART SUPPORT BLOOD PUMP			IMPELLA 5.5 WITH SMARTASSIST S2 SET, US			OZD			IMPELLA 5.5 WITH SMARTASSIST S2 SET, US			ABIOMED, INC.			US		2026748344		1000100		No			No		Yes	No	Health Professional			Manufacturer report
435	1220648-2026-03209	24341538	https://www.accessdata.fda.gov/scripts/cdrh/cfdocs/cfmaude/detail.cfm?mdrfoi__id=24341538&pc=OZD	11/09/2025	02/15/2026		02/15/2026			11/09/2025	02/15/2026					02/15/2026		TEMPORARY NON-ROLLER TYPE LEFT HEART SUPPORT BLOOD PUMP			IMPELLA 5.5 WITH SMARTASSIST S2 SET, US			OZD			IMPELLA 5.5 WITH SMARTASSIST S2 SET, US			ABIOMED, INC.			US		2026713097		1000100		No			No		Yes	No	Health Professional			Manufacturer report
436	1220648-2026-03211	24341540	https://www.accessdata.fda.gov/scripts/cdrh/cfdocs/cfmaude/detail.cfm?mdrfoi__id=24341540&pc=OZD	11/09/2025	02/15/2026		02/15/2026			11/09/2025	02/15/2026					02/15/2026		TEMPORARY NON-ROLLER TYPE LEFT HEART SUPPORT BLOOD PUMP			IMPELLA 5.5 WITH SMARTASSIST S2 SET, US			OZD			IMPELLA 5.5 WITH SMARTASSIST S2 SET, US			ABIOMED, INC.			US		2026736942		1000100		No			No		Yes	No	Health Professional			Manufacturer report
437	1220648-2026-03212	24341541	https://www.accessdata.fda.gov/scripts/cdrh/cfdocs/cfmaude/detail.cfm?mdrfoi__id=24341541&pc=OZD	11/09/2025			02/15/2026			11/09/2025	02/15/2026					02/15/2026		TEMPORARY NON-ROLLER TYPE LEFT HEART SUPPORT BLOOD PUMP			IMPELLA 5.5 WITH SMARTASSIST S2 SET, US			OZD			IMPELLA 5.5 WITH SMARTASSIST S2 SET, US			ABIOMED, INC.			US		2026731295		1000100		No			No		Yes	No	Health Professional			Manufacturer report
438	1220648-2026-03213	24341545	https://www.accessdata.fda.gov/scripts/cdrh/cfdocs/cfmaude/detail.cfm?mdrfoi__id=24341545&pc=OZD	11/10/2025	02/15/2026		02/15/2026			11/10/2025	02/15/2026					02/15/2026		TEMPORARY NON-ROLLER TYPE LEFT HEART SUPPORT BLOOD PUMP			IMPELLA 5.5 WITH SMARTASSIST S2 SET, US			OZD			IMPELLA 5.5 WITH SMARTASSIST S2 SET, US			ABIOMED, INC.			US		2026745090		000000000001000100		No			No		Yes	No	Health Professional			Manufacturer report
439	1220648-2026-03214	24341551	https://www.accessdata.fda.gov/scripts/cdrh/cfdocs/cfmaude/detail.cfm?mdrfoi__id=24341551&pc=OZD	11/11/2025	02/15/2026		02/15/2026			11/11/2025	02/15/2026					02/15/2026		TEMPORARY NON-ROLLER TYPE LEFT HEART SUPPORT BLOOD PUMP			IMPELLA 5.5 WITH SMARTASSIST S2 SET, US			OZD			IMPELLA 5.5 WITH SMARTASSIST S2 SET, US			ABIOMED, INC.			US		2026757838		1000100		No			No		Yes	No	Health Professional			Manufacturer report
440	1220648-2026-03215	24341555	https://www.accessdata.fda.gov/scripts/cdrh/cfdocs/cfmaude/detail.cfm?mdrfoi__id=24341555&pc=OZD	11/11/2025	02/15/2026		02/15/2026			11/11/2025	02/15/2026					02/15/2026		TEMPORARY NON-ROLLER TYPE LEFT HEART SUPPORT BLOOD PUMP			IMPELLA 5.5 WITH SMARTASSIST S2 SET, US			OZD			IMPELLA 5.5 WITH SMARTASSIST S2 SET, US			ABIOMED, INC.			US		2026677111		1000100		No			No		Yes	No	Health Professional			Manufacturer report
441	1220648-2026-03217	24341566	https://www.accessdata.fda.gov/scripts/cdrh/cfdocs/cfmaude/detail.cfm?mdrfoi__id=24341566&pc=OZD	11/12/2025	02/15/2026		02/15/2026			11/12/2025	02/15/2026					02/15/2026		TEMPORARY NON-ROLLER TYPE LEFT HEART SUPPORT BLOOD PUMP			IMPELLA 5.5 WITH SMARTASSIST S2 SET, US			OZD			IMPELLA 5.5 WITH SMARTASSIST S2 SET, US			ABIOMED, INC.			US		2026658687		1000100		No			No		Yes	No	Health Professional			Manufacturer report
442	1220648-2026-03219	24341570	https://www.accessdata.fda.gov/scripts/cdrh/cfdocs/cfmaude/detail.cfm?mdrfoi__id=24341570&pc=OZD	11/12/2025	02/15/2026		02/15/2026			11/13/2025	02/15/2026					02/15/2026		TEMPORARY NON-ROLLER TYPE LEFT HEART SUPPORT BLOOD PUMP			IMPELLA 5.5 WITH SMARTASSIST S2 SET, US			OZD			IMPELLA 5.5 WITH SMARTASSIST S2 SET, US			ABIOMED, INC.			US		2026731216		1000100		No			No		Yes	No	Health Professional			Manufacturer report
443	1220648-2026-03220	24341572	https://www.accessdata.fda.gov/scripts/cdrh/cfdocs/cfmaude/detail.cfm?mdrfoi__id=24341572&pc=OZD	11/12/2025	02/27/2026		02/15/2026			11/13/2025	02/15/2026					02/15/2026		TEMPORARY NON-ROLLER TYPE LEFT HEART SUPPORT BLOOD PUMP			IMPELLA 5.5 WITH SMARTASSIST S2 SET, US			OZD			IMPELLA 5.5 WITH SMARTASSIST S2 SET, US			ABIOMED, INC.			US		2026717596		1000100		No			No		Yes	No	Health Professional			Manufacturer report
444	1220648-2026-03210	24341576	https://www.accessdata.fda.gov/scripts/cdrh/cfdocs/cfmaude/detail.cfm?mdrfoi__id=24341576&pc=OZD	11/09/2025	02/23/2026		02/15/2026			11/09/2025	02/15/2026					02/15/2026		TEMPORARY NON-ROLLER TYPE LEFT HEART SUPPORT BLOOD PUMP			IMPELLA 5.5 WITH SMARTASSIST S2 SET, US			OZD			IMPELLA 5.5 WITH SMARTASSIST S2 SET, US			ABIOMED, INC.			US		2026743287		1000100		No			No		Yes	No	Health Professional			Manufacturer report
445	1220648-2026-03216	24341586	https://www.accessdata.fda.gov/scripts/cdrh/cfdocs/cfmaude/detail.cfm?mdrfoi__id=24341586&pc=OZD	02/06/2026	02/15/2026		02/15/2026			02/06/2026	02/15/2026							TEMPORARY NON-ROLLER TYPE LEFT HEART SUPPORT BLOOD PUMP			IMPELLA 5.5 WITH SMARTASSIST S2 SET, US			OZD						ABIOMED, INC. - 1220648			US		2025589143		000000000001000100		No			No		Yes	No	Health Professional			Manufacturer report
446	1220648-2026-03221	24341595	https://www.accessdata.fda.gov/scripts/cdrh/cfdocs/cfmaude/detail.cfm?mdrfoi__id=24341595&pc=OZD	02/07/2026	02/15/2026		02/15/2026			02/09/2026	02/15/2026					02/15/2026		TEMPORARY NON-ROLLER TYPE LEFT HEART SUPPORT BLOOD PUMP			IMPELLA CP SMART ASSIST SET, JP			OZD						ABIOMED, INC. - 1220648			US		2026781918		0048-0024-JP		No			No		Yes	No	Health Professional			Manufacturer report
447	1220648-2026-03186	24340861	https://www.accessdata.fda.gov/scripts/cdrh/cfdocs/cfmaude/detail.cfm?mdrfoi__id=24340861&pc=OZD	11/10/2025	02/26/2026		02/14/2026			11/10/2025	02/14/2026							TEMPORARY NON-ROLLER TYPE LEFT HEART SUPPORT BLOOD PUMP			IMPELLA 5.5 WITH SMARTASSIST S2 SET, US			OZD			IMPELLA 5.5 WITH SMARTASSIST S2 SET, US			ABIOMED, INC. - 1220648			US		2026733495		1000100		No			No		Yes	No	Health Professional			Manufacturer report
448	1220648-2026-03187	24340862	https://www.accessdata.fda.gov/scripts/cdrh/cfdocs/cfmaude/detail.cfm?mdrfoi__id=24340862&pc=OZD	11/11/2025			02/14/2026			11/11/2025	02/14/2026					02/14/2026		TEMPORARY NON-ROLLER TYPE LEFT HEART SUPPORT BLOOD PUMP			IMPELLA 5.5 WITH SMARTASSIST S2 SET, US			OZD			IMPELLA 5.5 WITH SMARTASSIST S2 SET, US			ABIOMED, INC. - 1220648			US		2026738697		000000000001000100		No			No		Yes	No	Health Professional			Manufacturer report
449	1220648-2026-03189	24340863	https://www.accessdata.fda.gov/scripts/cdrh/cfdocs/cfmaude/detail.cfm?mdrfoi__id=24340863&pc=OZD	11/11/2025			02/14/2026			11/11/2025	02/14/2026							TEMPORARY NON-ROLLER TYPE LEFT HEART SUPPORT BLOOD PUMP			IMPELLA 5.5 WITH SMARTASSIST S2 SET, US			OZD			IMPELLA 5.5 WITH SMARTASSIST S2 SET, US			ABIOMED, INC. - 1220648			US		2026739095		1000100		No			No		Yes	No	Health Professional			Manufacturer report
450	1220648-2026-03190	24340864	https://www.accessdata.fda.gov/scripts/cdrh/cfdocs/cfmaude/detail.cfm?mdrfoi__id=24340864&pc=OZD	11/11/2025	02/20/2026		02/14/2026			11/11/2025	02/14/2026					02/14/2026		TEMPORARY NON-ROLLER TYPE LEFT HEART SUPPORT BLOOD PUMP			IMPELLA 5.5 WITH SMARTASSIST S2 SET, US			OZD			IMPELLA 5.5 WITH SMARTASSIST S2 SET, US			ABIOMED, INC. - 1220648			US		2025486107		000000000001000100		No			No		Yes	No	Health Professional			Manufacturer report
451	1220648-2026-03191	24340881	https://www.accessdata.fda.gov/scripts/cdrh/cfdocs/cfmaude/detail.cfm?mdrfoi__id=24340881&pc=OZD	02/09/2026			02/14/2026			02/09/2026	02/14/2026							TEMPORARY NON-ROLLER TYPE LEFT HEART SUPPORT BLOOD PUMP			IMPELLA 5.5 WITH SMARTASSIST S2 SET, US			OZD						ABIOMED, INC. - 1220648			US		2026798642		1000100		No			No		Yes	No	Health Professional			Manufacturer report
452	1220648-2026-03193	24340900	https://www.accessdata.fda.gov/scripts/cdrh/cfdocs/cfmaude/detail.cfm?mdrfoi__id=24340900&pc=OZD	02/09/2026			02/14/2026			02/09/2026	02/14/2026							TEMPORARY NON-ROLLER TYPE LEFT HEART SUPPORT BLOOD PUMP			IMPELLA 5.5 WITH SMARTASSIST S2 SET, US			OZD						ABIOMED, INC. - 1220648			US		2026801040		1000100		No			No		Yes	No	Health Professional			Manufacturer report
453	1220648-2026-03196	24341231	https://www.accessdata.fda.gov/scripts/cdrh/cfdocs/cfmaude/detail.cfm?mdrfoi__id=24341231&pc=OZD	02/08/2026			02/14/2026			02/08/2026	02/14/2026							TEMPORARY NON-ROLLER TYPE LEFT HEART SUPPORT BLOOD PUMP			IMPELLA CP			OZD			IMPELLA CP			ABIOMED, INC. - 1220648			US		2026641096		0048-0014		No			No		Yes	No	Health Professional			Manufacturer report
454	1220648-2026-03113	24329788	https://www.accessdata.fda.gov/scripts/cdrh/cfdocs/cfmaude/detail.cfm?mdrfoi__id=24329788&pc=OZD	12/24/2025			02/13/2026			12/24/2025	02/13/2026			01/31/2026		02/13/2026		TEMPORARY NON-ROLLER TYPE LEFT HEART SUPPORT BLOOD PUMP			IMPELLA 5.5 WITH SMARTASSIST S2 SET, US			OZD			IMPELLA 5.5 WITH SMARTASSIST S2 SET, US			ABIOMED, INC. - 1220648			US		2025461072		000000000001000100		No			No		Yes	No	Health Professional			Manufacturer report
455	1220648-2026-03114	24331513	https://www.accessdata.fda.gov/scripts/cdrh/cfdocs/cfmaude/detail.cfm?mdrfoi__id=24331513&pc=OZD	02/04/2026			02/13/2026			02/04/2026	02/13/2026							TEMPORARY NON-ROLLER TYPE LEFT HEART SUPPORT BLOOD PUMP			IMPELLA 5.5 WITH SMARTASSIST S2 SET, EU			OZD						ABIOMED, INC. - 1220648			US		2026767252		1000482		No			No		Yes	No	Health Professional			Manufacturer report
456	1220648-2026-03115	24331525	https://www.accessdata.fda.gov/scripts/cdrh/cfdocs/cfmaude/detail.cfm?mdrfoi__id=24331525&pc=OZD	02/02/2026			02/13/2026			02/03/2026	02/13/2026					02/13/2026		TEMPORARY NON-ROLLER TYPE LEFT HEART SUPPORT BLOOD PUMP			IMPELLA OPTICAL CONTROLLER, PACKAGED, US			OZD						ABIOMED, INC. - 1220648			US		1455140		0042-0010-US		No			No		No	No	Health Professional			Manufacturer report
457	1220648-2026-03117	24331576	https://www.accessdata.fda.gov/scripts/cdrh/cfdocs/cfmaude/detail.cfm?mdrfoi__id=24331576&pc=OZD	02/04/2026			02/13/2026			02/05/2026	02/13/2026					02/13/2026		TEMPORARY NON-ROLLER TYPE LEFT HEART SUPPORT BLOOD PUMP			IMPELLA CP SMART ASSIST SET, EU			OZD						ABIOMED, INC. - 1220648			US		2026648400		0048-0014		No			No		Yes	No	Health Professional			Manufacturer report
458	1220648-2026-03125	24331931	https://www.accessdata.fda.gov/scripts/cdrh/cfdocs/cfmaude/detail.cfm?mdrfoi__id=24331931&pc=OZD	02/06/2026			02/13/2026			02/06/2026	02/13/2026							TEMPORARY NON-ROLLER TYPE LEFT HEART SUPPORT BLOOD PUMP			IMPELLA 5.5 WITH SMARTASSIST S2 SET, US			OZD						ABIOMED, INC. - 1220648			US		2026782830		000000000001000100		No			No		Yes	No	Health Professional			Manufacturer report
459	1220648-2026-03131	24332040	https://www.accessdata.fda.gov/scripts/cdrh/cfdocs/cfmaude/detail.cfm?mdrfoi__id=24332040&pc=OZD	02/06/2026			02/13/2026			02/06/2026	02/13/2026					02/13/2026		TEMPORARY NON-ROLLER TYPE LEFT HEART SUPPORT BLOOD PUMP			IMPELLA 5.5 WITH SMARTASSIST S2 SET, US			OZD						ABIOMED, INC. - 1220648			US		2026761573		000000000001000100		No			No		Yes	No	Health Professional			Manufacturer report
460	1220648-2026-03133	24332148	https://www.accessdata.fda.gov/scripts/cdrh/cfdocs/cfmaude/detail.cfm?mdrfoi__id=24332148&pc=OZD	02/03/2026			02/13/2026			02/04/2026	02/13/2026							TEMPORARY NON-ROLLER TYPE LEFT HEART SUPPORT BLOOD PUMP			IMPELLA 5.5 WITH SMARTASSIST S2 SET, US			OZD						ABIOMED, INC. - 1220648			US		2026804402		1000100		No			No		Yes	No	Health Professional			Manufacturer report
461	1220648-2026-03128	24332193	https://www.accessdata.fda.gov/scripts/cdrh/cfdocs/cfmaude/detail.cfm?mdrfoi__id=24332193&pc=OZD	02/06/2026	02/13/2026		02/13/2026			02/06/2026	02/13/2026					02/13/2026		TEMPORARY NON-ROLLER TYPE LEFT HEART SUPPORT BLOOD PUMP			IMPELLA 5.5 WITH SMARTASSIST S2 SET, US			OZD						ABIOMED, INC. - 1220648			US		2026796220		1000100		No			No		Yes	No	Health Professional			Manufacturer report
462	1220648-2026-03135	24332198	https://www.accessdata.fda.gov/scripts/cdrh/cfdocs/cfmaude/detail.cfm?mdrfoi__id=24332198&pc=OZD	03/09/2020			02/13/2026			01/23/2026	02/13/2026			10/31/2021		02/13/2026		TEMPORARY NON-ROLLER TYPE LEFT HEART SUPPORT BLOOD PUMP			IMPELLA CP PUMP 371 SET, US			OZD						ABIOMED, INC. - 1220648			US		1460680		0048-0024		No			No		Yes	No	Health Professional			Manufacturer report
463	1220648-2026-03138	24332468	https://www.accessdata.fda.gov/scripts/cdrh/cfdocs/cfmaude/detail.cfm?mdrfoi__id=24332468&pc=OZD	02/05/2026			02/13/2026			02/05/2026	02/13/2026					02/13/2026		TEMPORARY NON-ROLLER TYPE LEFT HEART SUPPORT BLOOD PUMP			IMPELLA 5.5 WITH SMARTASSIST S2 SET, EU			OZD						ABIOMED, INC. - 1220648			US		2026809035		1000482		No			No		Yes	No	Health Professional			Manufacturer report
464	1220648-2026-03139	24332742	https://www.accessdata.fda.gov/scripts/cdrh/cfdocs/cfmaude/detail.cfm?mdrfoi__id=24332742&pc=OZD	02/06/2026			02/13/2026			02/06/2026	02/13/2026					02/13/2026		TEMPORARY NON-ROLLER TYPE LEFT HEART SUPPORT BLOOD PUMP			IMPELLA 5.5 WITH SMARTASSIST S2 SET, US			OZD			IMPELLA 5.5 WITH SMARTASSIST S2 SET, US			ABIOMED, INC. - 1220648			US		2026786790		1000100		No			No		Yes	No	Health Professional			Manufacturer report
465	1220648-2026-03140	24333615	https://www.accessdata.fda.gov/scripts/cdrh/cfdocs/cfmaude/detail.cfm?mdrfoi__id=24333615&pc=OZD	02/07/2026			02/13/2026			02/07/2026	02/13/2026							TEMPORARY NON-ROLLER TYPE LEFT HEART SUPPORT BLOOD PUMP			IMPELLA 5.5 WITH SMARTASSIST S2 SET, US			OZD						ABIOMED, INC. - 1220648			US		2026756945		1000100		No			No		Yes	No	Health Professional			Manufacturer report
466	1220648-2026-03142	24333762	https://www.accessdata.fda.gov/scripts/cdrh/cfdocs/cfmaude/detail.cfm?mdrfoi__id=24333762&pc=OZD	02/08/2026			02/13/2026			02/08/2026	02/13/2026							TEMPORARY NON-ROLLER TYPE LEFT HEART SUPPORT BLOOD PUMP			IMPELLA 5.5 WITH SMARTASSIST S2 SET, US			OZD						ABIOMED, INC. - 1220648			US		2026811531		1000100		No			No		Yes	No	Health Professional			Manufacturer report
467	1220648-2026-03145	24334016	https://www.accessdata.fda.gov/scripts/cdrh/cfdocs/cfmaude/detail.cfm?mdrfoi__id=24334016&pc=OZD	02/02/2026	02/17/2026		02/13/2026			02/09/2026	02/13/2026							TEMPORARY NON-ROLLER TYPE LEFT HEART SUPPORT BLOOD PUMP			IMPELLA CONTROLLER, PACKAGED, JP			OZD			IMPELLA CONTROLLER, PACKAGED, JP			ABIOMED EUROPE GMBH - 3007904765			GM		1429248		0042-0000-JP		No			No		Yes	No	Health Professional			Manufacturer report
468	1220648-2026-03141	24334028	https://www.accessdata.fda.gov/scripts/cdrh/cfdocs/cfmaude/detail.cfm?mdrfoi__id=24334028&pc=OZD	02/08/2026	02/13/2026		02/13/2026			02/08/2026	02/13/2026					02/13/2026		TEMPORARY NON-ROLLER TYPE LEFT HEART SUPPORT BLOOD PUMP			IMPELLA 5.5 WITH SMARTASSIST S2 SET, US			OZD			IMPELLA 5.5 WITH SMARTASSIST S2 SET, US			ABIOMED, INC. - 1220648			US		2026693704		1000100		No			No		Yes	No	Health Professional			Manufacturer report
469	1220648-2026-03147	24334542	https://www.accessdata.fda.gov/scripts/cdrh/cfdocs/cfmaude/detail.cfm?mdrfoi__id=24334542&pc=OZD	02/08/2026			02/13/2026			02/08/2026	02/13/2026					02/13/2026		TEMPORARY NON-ROLLER TYPE LEFT HEART SUPPORT BLOOD PUMP			IMPELLA 5.5 WITH SMARTASSIST S2 SET, US			OZD						ABIOMED, INC. - 1220648			US		2026814136		1000100		No			No		Yes	No	Health Professional			Manufacturer report
470	1220648-2026-03149	24335104	https://www.accessdata.fda.gov/scripts/cdrh/cfdocs/cfmaude/detail.cfm?mdrfoi__id=24335104&pc=OZD	02/06/2026			02/13/2026			02/06/2026	02/13/2026							TEMPORARY NON-ROLLER TYPE LEFT HEART SUPPORT BLOOD PUMP			IMPELLA 5.5 WITH SMARTASSIST S2 SET, US			OZD			IMPELLA 5.5 WITH SMARTASSIST S2 SET, US			ABIOMED, INC. - 1220648			US		2026805669		1000100		No			No		Yes	No	Health Professional			Manufacturer report
471	1220648-2026-03152	24335215	https://www.accessdata.fda.gov/scripts/cdrh/cfdocs/cfmaude/detail.cfm?mdrfoi__id=24335215&pc=OZD	02/04/2026			02/13/2026			02/05/2026	02/13/2026					02/13/2026		TEMPORARY NON-ROLLER TYPE LEFT HEART SUPPORT BLOOD PUMP			IMPELLA CPSA C9+ SET, OUS			OZD						ABIOMED, INC. - 1220648			US		2026812174		000000000001000851		Device was returned to manufacturer			No		Yes	No	Health Professional			Manufacturer report
472	1220648-2026-03158	24335497	https://www.accessdata.fda.gov/scripts/cdrh/cfdocs/cfmaude/detail.cfm?mdrfoi__id=24335497&pc=OZD	12/05/2025			02/13/2026			12/05/2025	02/13/2026					02/13/2026		TEMPORARY NON-ROLLER TYPE LEFT HEART SUPPORT BLOOD PUMP			IMPELLA 5.5 WITH SMARTASSIST S2 SET, US			OZD			IMPELLA 5.5 WITH SMARTASSIST S2 SET, US			ABIOMED, INC. - 1220648			US		2026756985		1000100		No			No		Yes	No	Health Professional			Manufacturer report
473	1220648-2026-03150	24335778	https://www.accessdata.fda.gov/scripts/cdrh/cfdocs/cfmaude/detail.cfm?mdrfoi__id=24335778&pc=OZD	02/03/2026			02/13/2026			02/03/2026	02/13/2026					02/13/2026		TEMPORARY NON-ROLLER TYPE LEFT HEART SUPPORT BLOOD PUMP			IMPELLA CPSA C9+ SET, OUS			OZD						ABIOMED, INC. - 1220648			US		2026799383		000000000001000851		No			No		Yes	No	Health Professional			Manufacturer report
474	1220648-2026-03161	24337608	https://www.accessdata.fda.gov/scripts/cdrh/cfdocs/cfmaude/detail.cfm?mdrfoi__id=24337608&pc=OZD	02/08/2026			02/13/2026			02/08/2026	02/13/2026					02/13/2026		TEMPORARY NON-ROLLER TYPE LEFT HEART SUPPORT BLOOD PUMP			IMPELLA CP			OZD			IMPELLA CP			ABIOMED, INC. - 1220648			US		2026726981		1000080		No			No		Yes	No	Health Professional			Manufacturer report
475	1220648-2026-03162	24337609	https://www.accessdata.fda.gov/scripts/cdrh/cfdocs/cfmaude/detail.cfm?mdrfoi__id=24337609&pc=OZD	02/09/2026	02/25/2026		02/13/2026			02/09/2026	02/13/2026					02/13/2026		TEMPORARY NON-ROLLER TYPE LEFT HEART SUPPORT BLOOD PUMP			IMPELLA 5.5 WITH SMARTASSIST S2 SET, US			OZD			IMPELLA 5.5 WITH SMARTASSIST S2 SET, US			ABIOMED, INC.			US		2026709954		1000100		No			No		Yes	No	Health Professional			Manufacturer report
476	1220648-2026-03164	24337767	https://www.accessdata.fda.gov/scripts/cdrh/cfdocs/cfmaude/detail.cfm?mdrfoi__id=24337767&pc=OZD	02/09/2026	02/13/2026		02/13/2026			02/09/2026	02/13/2026					02/13/2026		TEMPORARY NON-ROLLER TYPE LEFT HEART SUPPORT BLOOD PUMP			IMPELLA 5.5 WITH SMARTASSIST S2 SET, US			OZD			IMPELLA 5.5 WITH SMARTASSIST S2 SET, US			ABIOMED, INC.			US		2026801848		1000100		No			No		Yes	No	Health Professional			Manufacturer report
477	1220648-2026-03168	24338018	https://www.accessdata.fda.gov/scripts/cdrh/cfdocs/cfmaude/detail.cfm?mdrfoi__id=24338018&pc=OZD	01/15/2026			02/13/2026			01/17/2026	02/13/2026					02/13/2026		TEMPORARY NON-ROLLER TYPE LEFT HEART SUPPORT BLOOD PUMP			IMPELLA CPSA C9+ SET, OUS			OZD						ABIOMED, INC. - 1220648			US		2026759484		000000000001000851		No			No		Yes	No	Health Professional			Manufacturer report
478	1220648-2026-03177	24338644	https://www.accessdata.fda.gov/scripts/cdrh/cfdocs/cfmaude/detail.cfm?mdrfoi__id=24338644&pc=OZD	02/08/2026			02/13/2026			02/08/2026	02/13/2026					02/13/2026		TEMPORARY NON-ROLLER TYPE LEFT HEART SUPPORT BLOOD PUMP			IMPELLA CP			OZD			IMPELLA CP			ABIOMED, INC. - 1220648			US		2026814039		1000080		No			No		Yes	No	Health Professional			Manufacturer report
479	1220648-2026-03179	24338715	https://www.accessdata.fda.gov/scripts/cdrh/cfdocs/cfmaude/detail.cfm?mdrfoi__id=24338715&pc=OZD	02/05/2026	02/13/2026		02/13/2026			02/09/2026	02/13/2026							TEMPORARY NON-ROLLER TYPE LEFT HEART SUPPORT BLOOD PUMP			IMPELLA 5.5 WITH SMARTASSIST S2 SET, EU			OZD			IMPELLA 5.5 WITH SMARTASSIST S2 SET, EU			ABIOMED, INC.			US		2026797539		1000482		No			No		Yes	No	Health Professional			Manufacturer report
480	1220648-2026-03180	24339390	https://www.accessdata.fda.gov/scripts/cdrh/cfdocs/cfmaude/detail.cfm?mdrfoi__id=24339390&pc=OZD	02/02/2026	02/18/2026		02/13/2026			02/09/2026	02/13/2026					02/13/2026		TEMPORARY NON-ROLLER TYPE LEFT HEART SUPPORT BLOOD PUMP			IMPELLA 5.5 SMARTASSIST S2 SET, JP			OZD						ABIOMED, INC. - 1220648			US		2026815534		1000459		No			No		Yes	No	Health Professional			Manufacturer report
481	1220648-2026-03181	24340102	https://www.accessdata.fda.gov/scripts/cdrh/cfdocs/cfmaude/detail.cfm?mdrfoi__id=24340102&pc=OZD	02/07/2026			02/13/2026			02/08/2026	02/13/2026					02/13/2026		TEMPORARY NON-ROLLER TYPE LEFT HEART SUPPORT BLOOD PUMP			IMPELLA 5.5			OZD			IMPELLA 5.5			ABIOMED, INC. - 1220648			US		2026797031		1000482		No			No		Yes	No	Health Professional			Manufacturer report
482	1220648-2026-03182	24340115	https://www.accessdata.fda.gov/scripts/cdrh/cfdocs/cfmaude/detail.cfm?mdrfoi__id=24340115&pc=OZD	02/07/2026			02/13/2026			02/08/2026	02/13/2026					02/13/2026		TEMPORARY NON-ROLLER TYPE LEFT HEART SUPPORT BLOOD PUMP			IMPELLA 5.5			OZD			IMPELLA 5.5			ABIOMED, INC. - 1220648			US		2026798736		1000100		No			No		Yes	No	Health Professional			Manufacturer report
483	1220648-2026-02961	24321305	https://www.accessdata.fda.gov/scripts/cdrh/cfdocs/cfmaude/detail.cfm?mdrfoi__id=24321305&pc=OZD	02/03/2026			02/12/2026			02/03/2026	02/12/2026							TEMPORARY NON-ROLLER TYPE LEFT HEART SUPPORT BLOOD PUMP			IMPELLA 5.5 WITH SMARTASSIST S2 SET, US			OZD						ABIOMED, INC. - 1220648			US		2026731217		1000100		No			No		Yes	No	Health Professional			Manufacturer report
484	1220648-2026-02962	24321315	https://www.accessdata.fda.gov/scripts/cdrh/cfdocs/cfmaude/detail.cfm?mdrfoi__id=24321315&pc=OZD	01/29/2026			02/12/2026			02/04/2026	02/12/2026					02/12/2026		TEMPORARY NON-ROLLER TYPE LEFT HEART SUPPORT BLOOD PUMP			IMPELLA CONTROLLER, PACKAGED, EU			OZD						ABIOMED, INC. - 1220648			US		1149033		0042-0000-EU		No			No		No	No	Health Professional			Manufacturer report
485	1220648-2026-02698	24321370	https://www.accessdata.fda.gov/scripts/cdrh/cfdocs/cfmaude/detail.cfm?mdrfoi__id=24321370&pc=OZD	02/03/2026			02/12/2026			02/03/2026	02/12/2026							TEMPORARY NON-ROLLER TYPE LEFT HEART SUPPORT BLOOD PUMP			IMPELLA 5.5 WITH SMARTASSIST S2 SET, US			OZD						ABIOMED, INC. - 1220648			US		2026801549		1000100		No			No		Yes	No	Health Professional			Manufacturer report
486	1220648-2026-02968	24321446	https://www.accessdata.fda.gov/scripts/cdrh/cfdocs/cfmaude/detail.cfm?mdrfoi__id=24321446&pc=OZD	12/02/2025			02/12/2026			12/02/2025	02/12/2026					02/12/2026		TEMPORARY NON-ROLLER TYPE LEFT HEART SUPPORT BLOOD PUMP			IMPELLA 5.5 WITH SMARTASSIST S2 SET, US			OZD			IMPELLA 5.5 WITH SMARTASSIST S2 SET, US			ABIOMED, INC. - 1220648			US		2026754442		000000000001000100		No			No		Yes	No	Health Professional			Manufacturer report
487	1220648-2026-02972	24321587	https://www.accessdata.fda.gov/scripts/cdrh/cfdocs/cfmaude/detail.cfm?mdrfoi__id=24321587&pc=OZD	02/03/2026			02/12/2026			02/05/2026	02/12/2026					02/12/2026		TEMPORARY NON-ROLLER TYPE LEFT HEART SUPPORT BLOOD PUMP			IMPELLA 5.5 WITH SMARTASSIST S2 SET, EU			OZD						ABIOMED, INC. - 1220648			US		2026804032		1000482		No			No		Yes	No	Health Professional			Manufacturer report
488	1220648-2026-02973	24321635	https://www.accessdata.fda.gov/scripts/cdrh/cfdocs/cfmaude/detail.cfm?mdrfoi__id=24321635&pc=OZD	02/04/2026			02/12/2026			02/05/2026	02/12/2026					02/12/2026		TEMPORARY NON-ROLLER TYPE LEFT HEART SUPPORT BLOOD PUMP			IMPELLA 5.5 SMARTASSIST S2 SET, JP			OZD						ABIOMED, INC. - 1220648			US		2026810000		000000000001000459		No			No		Yes	No	Health Professional			Manufacturer report
489	1220648-2026-02974	24321667	https://www.accessdata.fda.gov/scripts/cdrh/cfdocs/cfmaude/detail.cfm?mdrfoi__id=24321667&pc=OZD	02/04/2026			02/12/2026			02/04/2026	02/12/2026							TEMPORARY NON-ROLLER TYPE LEFT HEART SUPPORT BLOOD PUMP			IMPELLA CPSA C9+ SET, OUS			OZD						ABIOMED, INC. - 1220648			US		2026786084		1000851		No			No		Yes	No	Health Professional			Manufacturer report
490	1220648-2026-02979	24321760	https://www.accessdata.fda.gov/scripts/cdrh/cfdocs/cfmaude/detail.cfm?mdrfoi__id=24321760&pc=OZD	02/05/2026			02/12/2026			02/05/2026	02/12/2026					02/12/2026		TEMPORARY NON-ROLLER TYPE LEFT HEART SUPPORT BLOOD PUMP			IMPELLA 5.5 WITH SMARTASSIST S2 SET, US			OZD						ABIOMED, INC. - 1220648			US		2026802284		1000100		No			No		Yes	No	Health Professional			Manufacturer report
491	1220648-2026-02976	24321863	https://www.accessdata.fda.gov/scripts/cdrh/cfdocs/cfmaude/detail.cfm?mdrfoi__id=24321863&pc=OZD	01/26/2026			02/12/2026			01/26/2026	02/12/2026					02/12/2026		TEMPORARY NON-ROLLER TYPE LEFT HEART SUPPORT BLOOD PUMP			IMPELLA CONTROLLER, PACKAGED, EU			OZD						ABIOMED, INC. - 1220648			US		1170099		0042-0000-EU		Device was returned to manufacturer			No		No	No	Health Professional			Manufacturer report
492	1220648-2026-02987	24322316	https://www.accessdata.fda.gov/scripts/cdrh/cfdocs/cfmaude/detail.cfm?mdrfoi__id=24322316&pc=OZD	01/21/2026			02/12/2026			01/21/2026	02/12/2026							TEMPORARY NON-ROLLER TYPE LEFT HEART SUPPORT BLOOD PUMP			IMPELLA 5.5 WITH SMARTASSIST S2 SET, US			OZD						ABIOMED, INC. - 1220648			US		2026779525		000000000001000100		No			No		Yes	No	Health Professional			Manufacturer report
493	1220648-2026-02988	24322334	https://www.accessdata.fda.gov/scripts/cdrh/cfdocs/cfmaude/detail.cfm?mdrfoi__id=24322334&pc=OZD	02/04/2026			02/12/2026			02/05/2026	02/12/2026							TEMPORARY NON-ROLLER TYPE LEFT HEART SUPPORT BLOOD PUMP			IMPELLA CPSA C9+ SET, OUS			OZD						ABIOMED, INC. - 1220648			US		2026775284		000000000001000851		No			No		Yes	No	Health Professional			Manufacturer report
494	1220648-2026-02989	24322439	https://www.accessdata.fda.gov/scripts/cdrh/cfdocs/cfmaude/detail.cfm?mdrfoi__id=24322439&pc=OZD	02/04/2026			02/12/2026			02/04/2026	02/12/2026					02/12/2026		TEMPORARY NON-ROLLER TYPE LEFT HEART SUPPORT BLOOD PUMP			IMPELLA CPSA C9+ SET, OUS			OZD						ABIOMED, INC. - 1220648			US		2026796491		1000851		No			No		Yes	No	Health Professional			Manufacturer report
495	1220648-2026-02994	24322589	https://www.accessdata.fda.gov/scripts/cdrh/cfdocs/cfmaude/detail.cfm?mdrfoi__id=24322589&pc=OZD	02/05/2026			02/12/2026			02/05/2026	02/12/2026					02/12/2026		TEMPORARY NON-ROLLER TYPE LEFT HEART SUPPORT BLOOD PUMP			IMPELLA 5.5 WITH SMARTASSIST S2 SET, US			OZD						ABIOMED, INC. - 1220648			US		2026753279		000000000001000100		No			No		Yes	No	Health Professional			Manufacturer report
496	1220648-2026-02995	24322661	https://www.accessdata.fda.gov/scripts/cdrh/cfdocs/cfmaude/detail.cfm?mdrfoi__id=24322661&pc=OZD	02/05/2026			02/12/2026			02/06/2026	02/12/2026					02/12/2026		TEMPORARY NON-ROLLER TYPE LEFT HEART SUPPORT BLOOD PUMP			IMPELLA CPSA C9+ SET, OUS			OZD						ABIOMED, INC. - 1220648			US		2027829719		000000000001000851		No			No		Yes	No	Health Professional			Manufacturer report
497	1220648-2026-03000	24322788	https://www.accessdata.fda.gov/scripts/cdrh/cfdocs/cfmaude/detail.cfm?mdrfoi__id=24322788&pc=OZD	10/29/2025			02/12/2026			10/29/2025	02/12/2026					02/12/2026		TEMPORARY NON-ROLLER TYPE LEFT HEART SUPPORT BLOOD PUMP			IMPELLA 5.5 WITH SMARTASSIST S2 SET, US			OZD						ABIOMED, INC. - 1220648			US		2026745459		000000000001000100		No			No		Yes	No	Health Professional			Manufacturer report
498	1220648-2026-03001	24322898	https://www.accessdata.fda.gov/scripts/cdrh/cfdocs/cfmaude/detail.cfm?mdrfoi__id=24322898&pc=OZD	12/05/2025			02/12/2026			12/05/2025	02/12/2026							TEMPORARY NON-ROLLER TYPE LEFT HEART SUPPORT BLOOD PUMP			IMPELLA 5.5 WITH SMARTASSIST S2 SET, US			OZD			IMPELLA 5.5 WITH SMARTASSIST S2 SET, US			ABIOMED, INC. - 1220648			US		2026716259		1000100		No			No		Yes	No	Health Professional			Manufacturer report
499	1220648-2026-03004	24322938	https://www.accessdata.fda.gov/scripts/cdrh/cfdocs/cfmaude/detail.cfm?mdrfoi__id=24322938&pc=OZD	10/30/2025			02/12/2026			10/30/2025	02/12/2026					02/12/2026		TEMPORARY NON-ROLLER TYPE LEFT HEART SUPPORT BLOOD PUMP			IMPELLA 5.5 WITH SMARTASSIST S2 SET, US			OZD			IMPELLA 5.5 WITH SMARTASSIST S2 SET, US			ABIOMED, INC. - 1220648			US		2026733575		000000000001000100		No			No		Yes	No	Health Professional			Manufacturer report
500	1220648-2026-03003	24322939	https://www.accessdata.fda.gov/scripts/cdrh/cfdocs/cfmaude/detail.cfm?mdrfoi__id=24322939&pc=OZD	02/05/2026			02/12/2026			02/05/2026	02/12/2026					02/12/2026		TEMPORARY NON-ROLLER TYPE LEFT HEART SUPPORT BLOOD PUMP			IMPELLA CPSA C9+ SET, OUS			OZD						ABIOMED, INC. - 1220648			US		2026763599		1000851		No			No		Yes	No	Health Professional			Manufacturer report
501	1220648-2026-03006	24323112	https://www.accessdata.fda.gov/scripts/cdrh/cfdocs/cfmaude/detail.cfm?mdrfoi__id=24323112&pc=OZD	11/04/2025	02/20/2026		02/12/2026			11/04/2025	02/12/2026					02/12/2026		TEMPORARY NON-ROLLER TYPE LEFT HEART SUPPORT BLOOD PUMP			IMPELLA 5.5 WITH SMARTASSIST S2 SET, US			OZD			IMPELLA 5.5 WITH SMARTASSIST S2 SET, US			ABIOMED, INC. - 1220648			US		2026655572		000000000001000100		No			No		Yes	No	Health Professional			Manufacturer report
502	1220648-2026-03009	24323284	https://www.accessdata.fda.gov/scripts/cdrh/cfdocs/cfmaude/detail.cfm?mdrfoi__id=24323284&pc=OZD	12/05/2025			02/12/2026			12/05/2025	02/12/2026					02/12/2026		TEMPORARY NON-ROLLER TYPE LEFT HEART SUPPORT BLOOD PUMP			IMPELLA 5.5 WITH SMARTASSIST S2 SET, US			OZD			IMPELLA 5.5 WITH SMARTASSIST S2 SET, US			ABIOMED, INC. - 1220648			US		2026770525		1000100		No			No		Yes	No	Health Professional			Manufacturer report
503	1220648-2026-03013	24323420	https://www.accessdata.fda.gov/scripts/cdrh/cfdocs/cfmaude/detail.cfm?mdrfoi__id=24323420&pc=OZD	02/06/2026			02/12/2026			02/06/2026	02/12/2026					02/12/2026		TEMPORARY NON-ROLLER TYPE LEFT HEART SUPPORT BLOOD PUMP			IMPELLA 5.5 WITH SMARTASSIST S2 SET, US			OZD						ABIOMED, INC. - 1220648			US		2026742688		1000100		No			No		Yes	No	Health Professional			Manufacturer report
504	1220648-2026-03014	24323458	https://www.accessdata.fda.gov/scripts/cdrh/cfdocs/cfmaude/detail.cfm?mdrfoi__id=24323458&pc=OZD	10/29/2025			02/12/2026			10/29/2025	02/12/2026					02/12/2026		TEMPORARY NON-ROLLER TYPE LEFT HEART SUPPORT BLOOD PUMP			IMPELLA 5.5 WITH SMARTASSIST S2 SET, US			OZD			IMPELLA 5.5 WITH SMARTASSIST S2 SET, US			ABIOMED, INC. - 1220648			US		2026699548		000000000001000100		No			No		Yes	No	Health Professional			Manufacturer report
505	1220648-2026-03015	24323476	https://www.accessdata.fda.gov/scripts/cdrh/cfdocs/cfmaude/detail.cfm?mdrfoi__id=24323476&pc=OZD	02/06/2026			02/12/2026			02/06/2026	02/12/2026							TEMPORARY NON-ROLLER TYPE LEFT HEART SUPPORT BLOOD PUMP			IMPELLA 5.5 WITH SMARTASSIST S2 SET, US			OZD						ABIOMED, INC. - 1220648			US		2026814192		1000100		No			No		Yes	No	Health Professional			Manufacturer report
506	1220648-2026-03016	24323497	https://www.accessdata.fda.gov/scripts/cdrh/cfdocs/cfmaude/detail.cfm?mdrfoi__id=24323497&pc=OZD	10/30/2025			02/12/2026			10/30/2025	02/12/2026					02/12/2026		TEMPORARY NON-ROLLER TYPE LEFT HEART SUPPORT BLOOD PUMP			IMPELLA 5.5 WITH SMARTASSIST S2 SET, US			OZD			IMPELLA 5.5 WITH SMARTASSIST S2 SET, US			ABIOMED, INC. - 1220648			US		2026688210		000000000001000100		No			No		Yes	No	Health Professional			Manufacturer report
507	1220648-2026-03018	24323655	https://www.accessdata.fda.gov/scripts/cdrh/cfdocs/cfmaude/detail.cfm?mdrfoi__id=24323655&pc=OZD	02/06/2026			02/12/2026			02/06/2026	02/12/2026							TEMPORARY NON-ROLLER TYPE LEFT HEART SUPPORT BLOOD PUMP			IMPELLA OPTICAL CONTROLLER, PACKAGED, US			OZD						ABIOMED, INC. - 1220648			US		1468305		0042-0010-US		Device was returned to manufacturer			No		No	No	Health Professional			Manufacturer report
508	1220648-2026-03017	24323658	https://www.accessdata.fda.gov/scripts/cdrh/cfdocs/cfmaude/detail.cfm?mdrfoi__id=24323658&pc=OZD	10/31/2025			02/12/2026			10/31/2025	02/12/2026					02/12/2026		TEMPORARY NON-ROLLER TYPE LEFT HEART SUPPORT BLOOD PUMP			IMPELLA 5.5 WITH SMARTASSIST S2 SET, US			OZD			IMPELLA 5.5 WITH SMARTASSIST S2 SET, US			ABIOMED, INC. - 1220648			US		2025481862		000000000001000100		No			No		Yes	No	Health Professional			Manufacturer report
509	1220648-2026-03019	24323718	https://www.accessdata.fda.gov/scripts/cdrh/cfdocs/cfmaude/detail.cfm?mdrfoi__id=24323718&pc=OZD	11/03/2025	02/23/2026		02/12/2026			11/03/2025	02/12/2026					02/12/2026		TEMPORARY NON-ROLLER TYPE LEFT HEART SUPPORT BLOOD PUMP			IMPELLA 5.5 WITH SMARTASSIST S2 SET, US			OZD			IMPELLA 5.5 WITH SMARTASSIST S2 SET, US			ABIOMED, INC. - 1220648			US		2026737084		000000000001000100		No			No		Yes	No	Health Professional			Manufacturer report
510	1220648-2026-03021	24323826	https://www.accessdata.fda.gov/scripts/cdrh/cfdocs/cfmaude/detail.cfm?mdrfoi__id=24323826&pc=OZD	02/05/2026			02/12/2026			02/06/2026	02/12/2026							TEMPORARY NON-ROLLER TYPE LEFT HEART SUPPORT BLOOD PUMP			IMPELLA 5.5 WITH SMARTASSIST S2 SET, EU			OZD						ABIOMED, INC. - 1220648			US		2026779000		000000000001000482		No			No		Yes	No	Health Professional			Manufacturer report
511	1220648-2026-03022	24323837	https://www.accessdata.fda.gov/scripts/cdrh/cfdocs/cfmaude/detail.cfm?mdrfoi__id=24323837&pc=OZD	02/05/2026			02/12/2026			02/05/2026	02/12/2026					02/12/2026		TEMPORARY NON-ROLLER TYPE LEFT HEART SUPPORT BLOOD PUMP			IMPELLA CONTROLLER, PACKAGED, US			OZD						ABIOMED, INC. - 1220648			US		1129885		0042-0000-US		No			No		No	No	Health Professional			Manufacturer report
512	1220648-2026-03023	24323884	https://www.accessdata.fda.gov/scripts/cdrh/cfdocs/cfmaude/detail.cfm?mdrfoi__id=24323884&pc=OZD	02/06/2026			02/12/2026			02/06/2026	02/12/2026					02/12/2026		TEMPORARY NON-ROLLER TYPE LEFT HEART SUPPORT BLOOD PUMP			IMPELLA 5.5 WITH SMARTASSIST S2 SET, US			OZD						ABIOMED, INC. - 1220648			US		2025491318		1000100		No			No		Yes	No	Health Professional			Manufacturer report
513	1220648-2026-03024	24323943	https://www.accessdata.fda.gov/scripts/cdrh/cfdocs/cfmaude/detail.cfm?mdrfoi__id=24323943&pc=OZD	02/05/2026			02/12/2026			02/06/2026	02/12/2026					02/12/2026		TEMPORARY NON-ROLLER TYPE LEFT HEART SUPPORT BLOOD PUMP			IMPELLA 5.5 WITH SMARTASSIST S2 SET, US			OZD						ABIOMED, INC. - 1220648			US		2026803146		1000100		No			No		Yes	No	Health Professional			Manufacturer report
514	1220648-2026-03026	24323993	https://www.accessdata.fda.gov/scripts/cdrh/cfdocs/cfmaude/detail.cfm?mdrfoi__id=24323993&pc=OZD	11/03/2025			02/12/2026			11/03/2025	02/12/2026					02/12/2026		TEMPORARY NON-ROLLER TYPE LEFT HEART SUPPORT BLOOD PUMP			IMPELLA 5.5 WITH SMARTASSIST S2 SET, US			OZD			IMPELLA 5.5 WITH SMARTASSIST S2 SET, US			ABIOMED, INC. - 1220648			US		2026753236		000000000001000100		No			No		Yes	No	Health Professional			Manufacturer report
515	1220648-2026-03020	24324010	https://www.accessdata.fda.gov/scripts/cdrh/cfdocs/cfmaude/detail.cfm?mdrfoi__id=24324010&pc=OZD	02/03/2026			02/12/2026			02/04/2026	02/12/2026					02/12/2026		TEMPORARY NON-ROLLER TYPE LEFT HEART SUPPORT BLOOD PUMP			IMPELLA CPSA C9+ SET, OUS			OZD						ABIOMED, INC. - 1220648			US		2026778182		1000851		No			No		Yes	No	Health Professional			Manufacturer report
516	1220648-2026-03027	24324073	https://www.accessdata.fda.gov/scripts/cdrh/cfdocs/cfmaude/detail.cfm?mdrfoi__id=24324073&pc=OZD	02/06/2026			02/12/2026			02/06/2026	02/12/2026							TEMPORARY NON-ROLLER TYPE LEFT HEART SUPPORT BLOOD PUMP			IMPELLA 5.5 WITH SMARTASSIST S2 SET, US			OZD						ABIOMED, INC. - 1220648			US		2026798609		1000100		No			No		Yes	No	Health Professional			Manufacturer report
517	1220648-2026-03028	24324090	https://www.accessdata.fda.gov/scripts/cdrh/cfdocs/cfmaude/detail.cfm?mdrfoi__id=24324090&pc=OZD	11/03/2025			02/12/2026			11/03/2025	02/12/2026					02/12/2026		TEMPORARY NON-ROLLER TYPE LEFT HEART SUPPORT BLOOD PUMP			IMPELLA 5.5 WITH SMARTASSIST S2 SET, US			OZD			IMPELLA 5.5 WITH SMARTASSIST S2 SET, US			ABIOMED, INC. - 1220648			US		2026688240		000000000001000100		No			No		Yes	No	Health Professional			Manufacturer report
518	1220648-2026-03030	24324169	https://www.accessdata.fda.gov/scripts/cdrh/cfdocs/cfmaude/detail.cfm?mdrfoi__id=24324169&pc=OZD	11/04/2025			02/12/2026			11/04/2025	02/12/2026					02/12/2026		TEMPORARY NON-ROLLER TYPE LEFT HEART SUPPORT BLOOD PUMP			IMPELLA 5.5 WITH SMARTASSIST S2 SET, US			OZD			IMPELLA 5.5 WITH SMARTASSIST S2 SET, US			ABIOMED, INC. - 1220648			US		2026736327		000000000001000100		No			No		Yes	No	Health Professional			Manufacturer report
519	1220648-2026-03032	24324315	https://www.accessdata.fda.gov/scripts/cdrh/cfdocs/cfmaude/detail.cfm?mdrfoi__id=24324315&pc=OZD	12/07/2025			02/12/2026			12/07/2025	02/12/2026					02/12/2026		TEMPORARY NON-ROLLER TYPE LEFT HEART SUPPORT BLOOD PUMP			IMPELLA 5.5 WITH SMARTASSIST S2 SET, US			OZD			IMPELLA 5.5 WITH SMARTASSIST S2 SET, US			ABIOMED, INC. - 1220648			US		2026773832		000000000001000100		No			No		Yes	No	Health Professional			Manufacturer report
520	1220648-2026-03033	24324381	https://www.accessdata.fda.gov/scripts/cdrh/cfdocs/cfmaude/detail.cfm?mdrfoi__id=24324381&pc=OZD	01/31/2026			02/12/2026			02/02/2026	02/12/2026					02/12/2026		TEMPORARY NON-ROLLER TYPE LEFT HEART SUPPORT BLOOD PUMP			IMPELLA CPSA C9+ SET, OUS			OZD						ABIOMED, INC. - 1220648			US		2026807744		1000851		No			No		Yes	No	Health Professional			Manufacturer report
521	1220648-2026-03034	24324404	https://www.accessdata.fda.gov/scripts/cdrh/cfdocs/cfmaude/detail.cfm?mdrfoi__id=24324404&pc=OZD	12/07/2025			02/12/2026			12/07/2025	02/12/2026					02/12/2026		TEMPORARY NON-ROLLER TYPE LEFT HEART SUPPORT BLOOD PUMP			IMPELLA 5.5 WITH SMARTASSIST S2 SET, US			OZD			IMPELLA 5.5 WITH SMARTASSIST S2 SET, US			ABIOMED, INC. - 1220648			US		2026679257		000000000001000100		No			No		Yes	No	Health Professional			Manufacturer report
522	1220648-2026-03036	24324458	https://www.accessdata.fda.gov/scripts/cdrh/cfdocs/cfmaude/detail.cfm?mdrfoi__id=24324458&pc=OZD	02/06/2026			02/12/2026			02/06/2026	02/12/2026							TEMPORARY NON-ROLLER TYPE LEFT HEART SUPPORT BLOOD PUMP			IMPELLA CONTROLLER, PACKAGED, US			OZD						ABIOMED, INC. - 1220648			US		1249361		0042-0000-US		Device was returned to manufacturer			No		No	No	Health Professional			Manufacturer report
523	1220648-2026-03037	24324523	https://www.accessdata.fda.gov/scripts/cdrh/cfdocs/cfmaude/detail.cfm?mdrfoi__id=24324523&pc=OZD	12/07/2025			02/12/2026			12/07/2025	02/12/2026					02/12/2026		TEMPORARY NON-ROLLER TYPE LEFT HEART SUPPORT BLOOD PUMP			IMPELLA 5.5 WITH SMARTASSIST S2 SET, US			OZD			IMPELLA 5.5 WITH SMARTASSIST S2 SET, US			ABIOMED, INC. - 1220648			US		2026746974		000000000001000100		No			No		Yes	No	Health Professional			Manufacturer report
524	1220648-2026-03040	24324562	https://www.accessdata.fda.gov/scripts/cdrh/cfdocs/cfmaude/detail.cfm?mdrfoi__id=24324562&pc=OZD	12/08/2025			02/12/2026			12/08/2025	02/12/2026							TEMPORARY NON-ROLLER TYPE LEFT HEART SUPPORT BLOOD PUMP			IMPELLA 5.5 WITH SMARTASSIST S2 SET, US			OZD			IMPELLA 5.5 WITH SMARTASSIST S2 SET, US			ABIOMED, INC. - 1220648			US		2026745072		000000000001000100		No			No		Yes	No	Health Professional			Manufacturer report
525	1220648-2026-03039	24324585	https://www.accessdata.fda.gov/scripts/cdrh/cfdocs/cfmaude/detail.cfm?mdrfoi__id=24324585&pc=OZD	02/03/2026			02/12/2026			02/03/2026	02/12/2026					02/12/2026		TEMPORARY NON-ROLLER TYPE LEFT HEART SUPPORT BLOOD PUMP			IMPELLA CPSA C9+ SET, OUS			OZD						ABIOMED, INC. - 1220648			US		2026782520		1000851		No			No		Yes	No	Health Professional			Manufacturer report
526	1220648-2026-03042	24324634	https://www.accessdata.fda.gov/scripts/cdrh/cfdocs/cfmaude/detail.cfm?mdrfoi__id=24324634&pc=OZD	12/08/2025			02/12/2026			12/08/2025	02/12/2026					02/12/2026		TEMPORARY NON-ROLLER TYPE LEFT HEART SUPPORT BLOOD PUMP			IMPELLA 5.5 WITH SMARTASSIST S2 SET, US			OZD			IMPELLA 5.5 WITH SMARTASSIST S2 SET, US			ABIOMED, INC. - 1220648			US		2026738702		000000000001000100		No			No		Yes	No	Health Professional			Manufacturer report
527	1220648-2026-03043	24324646	https://www.accessdata.fda.gov/scripts/cdrh/cfdocs/cfmaude/detail.cfm?mdrfoi__id=24324646&pc=OZD	02/06/2026			02/12/2026			02/06/2026	02/12/2026					02/12/2026		TEMPORARY NON-ROLLER TYPE LEFT HEART SUPPORT BLOOD PUMP			OPTICAL, AIC, IMPELLA CONNECT, PKGD, US			OZD						ABIOMED, INC. - 1220648			US		1477997		0042-0040-US		No			No		No	No	Health Professional			Manufacturer report
528	1220648-2026-03045	24324741	https://www.accessdata.fda.gov/scripts/cdrh/cfdocs/cfmaude/detail.cfm?mdrfoi__id=24324741&pc=OZD	02/03/2026			02/12/2026			02/03/2026	02/12/2026					02/12/2026		TEMPORARY NON-ROLLER TYPE LEFT HEART SUPPORT BLOOD PUMP			IMPELLA 5.5 WITH SMARTASSIST S2 SET, US			OZD						ABIOMED, INC. - 1220648			US		2026772528		1000100		No			No		Yes	No	Health Professional			Manufacturer report
529	1220648-2026-03046	24324815	https://www.accessdata.fda.gov/scripts/cdrh/cfdocs/cfmaude/detail.cfm?mdrfoi__id=24324815&pc=OZD	12/16/2025			02/12/2026			12/16/2025	02/12/2026					02/12/2026		TEMPORARY NON-ROLLER TYPE LEFT HEART SUPPORT BLOOD PUMP			IMPELLA 5.5 WITH SMARTASSIST S2 SET, US			OZD			IMPELLA 5.5 WITH SMARTASSIST S2 SET, US			ABIOMED, INC. - 1220648			US		2026775688		000000000001000100		No			No		Yes	No	Health Professional			Manufacturer report
530	1220648-2026-03059	24326546	https://www.accessdata.fda.gov/scripts/cdrh/cfdocs/cfmaude/detail.cfm?mdrfoi__id=24326546&pc=OZD	12/06/2025			02/12/2026			12/06/2025	02/12/2026					02/12/2026		TEMPORARY NON-ROLLER TYPE LEFT HEART SUPPORT BLOOD PUMP			IMPELLA 5.5 WITH SMARTASSIST S2 SET, US			OZD			IMPELLA 5.5 WITH SMARTASSIST S2 SET, US			ABIOMED, INC. - 1220648			US		2026717826		1000100		No			No		Yes	No	Health Professional			Manufacturer report
531	1220648-2026-03066	24326961	https://www.accessdata.fda.gov/scripts/cdrh/cfdocs/cfmaude/detail.cfm?mdrfoi__id=24326961&pc=OZD	12/07/2025			02/12/2026			12/07/2025	02/12/2026					02/12/2026		TEMPORARY NON-ROLLER TYPE LEFT HEART SUPPORT BLOOD PUMP			IMPELLA 5.5 WITH SMARTASSIST S2 SET, US			OZD			IMPELLA 5.5 WITH SMARTASSIST S2 SET, US			ABIOMED, INC. - 1220648			US		2026688936		1000100		No			No		Yes	No	Health Professional			Manufacturer report
532	1220648-2026-03070	24327366	https://www.accessdata.fda.gov/scripts/cdrh/cfdocs/cfmaude/detail.cfm?mdrfoi__id=24327366&pc=OZD	02/06/2026			02/12/2026			02/07/2026	02/12/2026					02/12/2026		TEMPORARY NON-ROLLER TYPE LEFT HEART SUPPORT BLOOD PUMP			IMPELLA 5.5 WITH SMARTASSIST S2 SET, EU			OZD			IMPELLA 5.5 WITH SMARTASSIST S2 SET, EU			ABIOMED, INC. - 1220648			US		2026756574		000000000001000482		No			No		Yes	No	Health Professional			Manufacturer report
533	1220648-2026-03071	24327421	https://www.accessdata.fda.gov/scripts/cdrh/cfdocs/cfmaude/detail.cfm?mdrfoi__id=24327421&pc=OZD	02/06/2026			02/12/2026			02/06/2026	02/12/2026					02/12/2026		TEMPORARY NON-ROLLER TYPE LEFT HEART SUPPORT BLOOD PUMP			IMPELLA CPSA C9+ SET, OUS			OZD			IMPELLA CPSA C9+ SET, OUS			ABIOMED, INC. - 1220648			US		2027816387		1000851		No			No		Yes	No	Health Professional			Manufacturer report
534	1220648-2026-03072	24327473	https://www.accessdata.fda.gov/scripts/cdrh/cfdocs/cfmaude/detail.cfm?mdrfoi__id=24327473&pc=OZD	10/01/2025			02/12/2026			10/01/2025	02/12/2026					02/12/2026		TEMPORARY NON-ROLLER TYPE LEFT HEART SUPPORT BLOOD PUMP			IMPELLA CONTROLLER, PACKAGED, US			OZD			IMPELLA CONTROLLER, PACKAGED, US			ABIOMED, INC. - 1220648			US		1281602		0042-0000-US		No			No		No	No	Health Professional			Manufacturer report
535	1220648-2026-03074	24327611	https://www.accessdata.fda.gov/scripts/cdrh/cfdocs/cfmaude/detail.cfm?mdrfoi__id=24327611&pc=OZD	02/05/2026			02/12/2026			02/06/2026	02/12/2026					02/12/2026		TEMPORARY NON-ROLLER TYPE LEFT HEART SUPPORT BLOOD PUMP			IMPELLA 5.5 WITH SMARTASSIST S2 SET, US			OZD						ABIOMED, INC. - 1220648			US		2026804473		1000100		No			No		Yes	No	Health Professional			Manufacturer report
536	1220648-2026-03076	24327680	https://www.accessdata.fda.gov/scripts/cdrh/cfdocs/cfmaude/detail.cfm?mdrfoi__id=24327680&pc=OZD	02/06/2026			02/12/2026			02/06/2026	02/12/2026							TEMPORARY NON-ROLLER TYPE LEFT HEART SUPPORT BLOOD PUMP			IMPELLA 5.5 WITH SMARTASSIST S2 SET, US			OZD						ABIOMED, INC. - 1220648			US		2026796345		1000100		No			No		Yes	No	Health Professional			Manufacturer report
537	1220648-2026-03080	24327927	https://www.accessdata.fda.gov/scripts/cdrh/cfdocs/cfmaude/detail.cfm?mdrfoi__id=24327927&pc=OZD	02/07/2026			02/12/2026			02/07/2026	02/12/2026							TEMPORARY NON-ROLLER TYPE LEFT HEART SUPPORT BLOOD PUMP			IMPELLA 5.5 WITH SMARTASSIST S2 SET, US			OZD			IMPELLA 5.5 WITH SMARTASSIST S2 SET, US			ABIOMED, INC. - 1220648			US		2026775777		000000000001000100		No			No		Yes	No	Health Professional			Manufacturer report
538	1220648-2026-03082	24328043	https://www.accessdata.fda.gov/scripts/cdrh/cfdocs/cfmaude/detail.cfm?mdrfoi__id=24328043&pc=OZD	02/06/2026			02/12/2026			02/06/2026	02/12/2026					02/12/2026		TEMPORARY NON-ROLLER TYPE LEFT HEART SUPPORT BLOOD PUMP			IMPELLA 5.5 WITH SMARTASSIST S2 SET, US			OZD			IMPELLA 5.5 WITH SMARTASSIST S2 SET, US			ABIOMED, INC. - 1220648			US		2026801781		1000100		No			No		Yes	No	Health Professional			Manufacturer report
539	1220648-2026-03084	24328364	https://www.accessdata.fda.gov/scripts/cdrh/cfdocs/cfmaude/detail.cfm?mdrfoi__id=24328364&pc=OZD	02/07/2026			02/12/2026			02/07/2026	02/12/2026					02/12/2026		TEMPORARY NON-ROLLER TYPE LEFT HEART SUPPORT BLOOD PUMP			IMPELLA 5.5 WITH SMARTASSIST S2 SET, US			OZD			IMPELLA 5.5 WITH SMARTASSIST S2 SET, US			ABIOMED, INC. - 1220648			US		2026730378		000000000001000100		No			No		Yes	No	Health Professional			Manufacturer report
540	1220648-2026-03090	24328534	https://www.accessdata.fda.gov/scripts/cdrh/cfdocs/cfmaude/detail.cfm?mdrfoi__id=24328534&pc=OZD	02/08/2026			02/12/2026			02/08/2026	02/12/2026							TEMPORARY NON-ROLLER TYPE LEFT HEART SUPPORT BLOOD PUMP			IMPELLA 5.5 WITH SMARTASSIST S2 SET, US			OZD			IMPELLA 5.5 WITH SMARTASSIST S2 SET, US			ABIOMED, INC. - 1220648			US		2026809821		000000000001000100		No			No		Yes	No	Health Professional			Manufacturer report
541	1220648-2026-03091	24328573	https://www.accessdata.fda.gov/scripts/cdrh/cfdocs/cfmaude/detail.cfm?mdrfoi__id=24328573&pc=OZD	02/06/2026			02/12/2026			02/06/2026	02/12/2026					02/12/2026		TEMPORARY NON-ROLLER TYPE LEFT HEART SUPPORT BLOOD PUMP			IMPELLA 5.5 WITH SMARTASSIST S2 SET, US			OZD			IMPELLA 5.5 WITH SMARTASSIST S2 SET, US			ABIOMED, INC. - 1220648			US		2026794830		1000100		No			No		Yes	No	Health Professional			Manufacturer report
542	1220648-2026-03092	24328581	https://www.accessdata.fda.gov/scripts/cdrh/cfdocs/cfmaude/detail.cfm?mdrfoi__id=24328581&pc=OZD	02/08/2026	02/18/2026		02/12/2026			02/08/2026	02/12/2026							TEMPORARY NON-ROLLER TYPE LEFT HEART SUPPORT BLOOD PUMP			IMPELLA 5.5 WITH SMARTASSIST S2 SET, US			OZD			IMPELLA 5.5 WITH SMARTASSIST S2 SET, US			ABIOMED, INC. - 1220648			US		2026786889		000000000001000100		No			No		Yes	No	Health Professional			Manufacturer report
543	1220648-2026-03095	24329255	https://www.accessdata.fda.gov/scripts/cdrh/cfdocs/cfmaude/detail.cfm?mdrfoi__id=24329255&pc=OZD	12/19/2025			02/12/2026			01/22/2026	02/12/2026					02/12/2026		TEMPORARY NON-ROLLER TYPE LEFT HEART SUPPORT BLOOD PUMP			IMPELLA CONTROLLER, PACKAGED, US			OZD						ABIOMED, INC. - 1220648			US		1122790		0042-0000-US		Device was returned to manufacturer			No		No	No	Health Professional			Manufacturer report
544	1220648-2026-03096	24329602	https://www.accessdata.fda.gov/scripts/cdrh/cfdocs/cfmaude/detail.cfm?mdrfoi__id=24329602&pc=OZD	12/16/2025			02/12/2026			12/16/2025	02/12/2026					02/12/2026		TEMPORARY NON-ROLLER TYPE LEFT HEART SUPPORT BLOOD PUMP			IMPELLA 5.5 WITH SMARTASSIST S2 SET, US			OZD			IMPELLA 5.5 WITH SMARTASSIST S2 SET, US			ABIOMED, INC. - 1220648			US		2026731161		000000000001000100		No			No		Yes	No	Health Professional			Manufacturer report
545	1220648-2026-03100	24329658	https://www.accessdata.fda.gov/scripts/cdrh/cfdocs/cfmaude/detail.cfm?mdrfoi__id=24329658&pc=OZD	12/20/2025	02/12/2026		02/12/2026			12/21/2025	02/12/2026							TEMPORARY NON-ROLLER TYPE LEFT HEART SUPPORT BLOOD PUMP			OPTICAL AIC W/IMPELLA CONNECT, PKGD, JP			OZD			OPTICAL AIC W/IMPELLA CONNECT, PKGD, JP			ABIOMED, INC. - 1220648			US				0042-0040-JP		No			No		No	No	Health Professional			Manufacturer report
546	1220648-2026-02827	24310972	https://www.accessdata.fda.gov/scripts/cdrh/cfdocs/cfmaude/detail.cfm?mdrfoi__id=24310972&pc=OZD	12/11/2025			02/11/2026			12/11/2025	02/11/2026					02/11/2026		TEMPORARY NON-ROLLER TYPE LEFT HEART SUPPORT BLOOD PUMP			IMPELLA 5.5 WITH SMARTASSIST S2 SET, US			OZD						ABIOMED, INC.			US		2026679795		000000000001000100		No			No		Yes	No	Health Professional			Manufacturer report
547	1220648-2026-02828	24312488	https://www.accessdata.fda.gov/scripts/cdrh/cfdocs/cfmaude/detail.cfm?mdrfoi__id=24312488&pc=OZD	01/22/2026			02/11/2026			01/22/2026	02/11/2026					02/11/2026		TEMPORARY NON-ROLLER TYPE LEFT HEART SUPPORT BLOOD PUMP			IMPELLA CONTROLLER, PACKAGED, US			OZD						ABIOMED, INC. - 1220648			US		1183021		0042-0000-US		Device was returned to manufacturer			No		No	No	Health Professional			Manufacturer report
548	1220648-2026-02820	24312653	https://www.accessdata.fda.gov/scripts/cdrh/cfdocs/cfmaude/detail.cfm?mdrfoi__id=24312653&pc=OZD	02/02/2026	02/10/2026		02/11/2026			02/02/2026	02/11/2026							TEMPORARY NON-ROLLER TYPE LEFT HEART SUPPORT BLOOD PUMP			IMPELLA 5.5 WITH SMARTASSIST S2 SET, US			OZD						ABIOMED, INC. - 1220648			US		2026811553		000000000001000100		No			No		Yes	No	Health Professional			Manufacturer report
549	1220648-2026-02831	24312677	https://www.accessdata.fda.gov/scripts/cdrh/cfdocs/cfmaude/detail.cfm?mdrfoi__id=24312677&pc=OZD	02/03/2026			02/11/2026			02/03/2026	02/11/2026							TEMPORARY NON-ROLLER TYPE LEFT HEART SUPPORT BLOOD PUMP			OPTICAL, AIC, IMPELLA CONNECT, PKGD, US			OZD						ABIOMED, INC. - 1220648			US		1917655		0042-0040-US		No			No		No	No	Health Professional			Manufacturer report
550	1220648-2026-02832	24312695	https://www.accessdata.fda.gov/scripts/cdrh/cfdocs/cfmaude/detail.cfm?mdrfoi__id=24312695&pc=OZD	02/03/2026			02/11/2026			02/03/2026	02/11/2026					02/11/2026		TEMPORARY NON-ROLLER TYPE LEFT HEART SUPPORT BLOOD PUMP			OPTICAL, AIC, IMPELLA CONNECT, PKGD, US			OZD						ABIOMED, INC. - 1220648			US		1445594		0042-0040-US		Device was returned to manufacturer			No		No	No	Health Professional			Manufacturer report
551	1220648-2026-02834	24312797	https://www.accessdata.fda.gov/scripts/cdrh/cfdocs/cfmaude/detail.cfm?mdrfoi__id=24312797&pc=OZD	02/04/2026			02/11/2026			02/05/2026	02/11/2026					02/11/2026		TEMPORARY NON-ROLLER TYPE LEFT HEART SUPPORT BLOOD PUMP			IMPELLA CONTROLLER, PACKAGED, US			OZD						ABIOMED, INC. - 1220648			US		1204375		0042-0000-US		Device was returned to manufacturer			No		No	No	Health Professional			Manufacturer report
552	1220648-2026-02836	24312868	https://www.accessdata.fda.gov/scripts/cdrh/cfdocs/cfmaude/detail.cfm?mdrfoi__id=24312868&pc=OZD	01/22/2026			02/11/2026			01/22/2026	02/11/2026					02/11/2026		TEMPORARY NON-ROLLER TYPE LEFT HEART SUPPORT BLOOD PUMP			IMPELLA CONTROLLER, PACKAGED, US			OZD						ABIOMED, INC. - 1220648			US		1133728		0042-0000-US		No			No		No	No	Health Professional			Manufacturer report
553	1220648-2026-02837	24312934	https://www.accessdata.fda.gov/scripts/cdrh/cfdocs/cfmaude/detail.cfm?mdrfoi__id=24312934&pc=OZD	02/01/2026			02/11/2026			02/02/2026	02/11/2026					02/11/2026		TEMPORARY NON-ROLLER TYPE LEFT HEART SUPPORT BLOOD PUMP			IMPELLA CPSA C9+ SET, OUS			OZD						ABIOMED, INC. - 1220648			US		2026813503		000000000001000851		No			No		Yes	No	Health Professional			Manufacturer report
554	1220648-2026-02841	24313083	https://www.accessdata.fda.gov/scripts/cdrh/cfdocs/cfmaude/detail.cfm?mdrfoi__id=24313083&pc=OZD	02/04/2026			02/11/2026			02/04/2026	02/11/2026					02/11/2026		TEMPORARY NON-ROLLER TYPE LEFT HEART SUPPORT BLOOD PUMP			IMPELLA CPSA C9+ SET, OUS			OZD						ABIOMED, INC. - 1220648			US		2026789851		000000000001000851		No			No		Yes	No	Health Professional			Manufacturer report
555	1220648-2026-02842	24313086	https://www.accessdata.fda.gov/scripts/cdrh/cfdocs/cfmaude/detail.cfm?mdrfoi__id=24313086&pc=OZD	02/05/2026			02/11/2026			02/05/2026	02/11/2026					02/11/2026		TEMPORARY NON-ROLLER TYPE LEFT HEART SUPPORT BLOOD PUMP			IMPELLA 5.5 WITH SMARTASSIST S2 SET, US			OZD						ABIOMED, INC. - 1220648			US		2026775866		1000100		No			No		Yes	No	Health Professional			Manufacturer report
556	1220648-2026-02845	24313156	https://www.accessdata.fda.gov/scripts/cdrh/cfdocs/cfmaude/detail.cfm?mdrfoi__id=24313156&pc=OZD	01/27/2026			02/11/2026			01/27/2026	02/11/2026					02/11/2026		TEMPORARY NON-ROLLER TYPE LEFT HEART SUPPORT BLOOD PUMP			IMPELLA 5.5 WITH SMARTASSIST S2 SET, US			OZD						ABIOMED, INC. - 1220648			US		2026804481		000000000001000100		No			No		Yes	No	Health Professional			Manufacturer report
557	1220648-2026-02846	24313211	https://www.accessdata.fda.gov/scripts/cdrh/cfdocs/cfmaude/detail.cfm?mdrfoi__id=24313211&pc=OZD	01/27/2026			02/11/2026			01/27/2026	02/11/2026							TEMPORARY NON-ROLLER TYPE LEFT HEART SUPPORT BLOOD PUMP			IMPELLA 5.5 WITH SMARTASSIST S2 SET, US			OZD						ABIOMED, INC. - 1220648			US		2026779510		000000000001000100		No			No			No	Health Professional			Manufacturer report
558	1220648-2026-02853	24313294	https://www.accessdata.fda.gov/scripts/cdrh/cfdocs/cfmaude/detail.cfm?mdrfoi__id=24313294&pc=OZD	10/28/2025			02/11/2026			10/28/2025	02/11/2026					02/11/2026		TEMPORARY NON-ROLLER TYPE LEFT HEART SUPPORT BLOOD PUMP			IMPELLA CP			OZD			IMPELLA CP			ABIOMED, INC.			US		2026662754		0048-0045		No			No		Yes	No	Health Professional			Manufacturer report
559	1220648-2026-02854	24313300	https://www.accessdata.fda.gov/scripts/cdrh/cfdocs/cfmaude/detail.cfm?mdrfoi__id=24313300&pc=OZD	02/03/2026			02/11/2026			02/04/2026	02/11/2026							TEMPORARY NON-ROLLER TYPE LEFT HEART SUPPORT BLOOD PUMP			IMPELLA 5.5 WITH SMARTASSIST S2 SET, US			OZD						ABIOMED, INC. - 1220648			US		2026742081		000000000001000100		No			No		Yes	No	Health Professional			Manufacturer report
560	1220648-2026-02855	24313308	https://www.accessdata.fda.gov/scripts/cdrh/cfdocs/cfmaude/detail.cfm?mdrfoi__id=24313308&pc=OZD	10/28/2025			02/11/2026			10/28/2025	02/11/2026					02/11/2026		TEMPORARY NON-ROLLER TYPE LEFT HEART SUPPORT BLOOD PUMP			IMPELLA CP			OZD			IMPELLA CP			ABIOMED, INC.			US		2026699669		000000000001000080		No			No		Yes	No	Health Professional			Manufacturer report
561	1220648-2026-02859	24313338	https://www.accessdata.fda.gov/scripts/cdrh/cfdocs/cfmaude/detail.cfm?mdrfoi__id=24313338&pc=OZD	10/28/2025			02/11/2026			10/28/2025	02/11/2026					02/11/2026		TEMPORARY NON-ROLLER TYPE LEFT HEART SUPPORT BLOOD PUMP			IMPELLA 5.5 WITH SMARTASSIST S2 SET, US			OZD						ABIOMED, INC. - 1220648			US		2026689285		000000000001000100		No			No		Yes	No	Health Professional			Manufacturer report
562	1220648-2026-02860	24313363	https://www.accessdata.fda.gov/scripts/cdrh/cfdocs/cfmaude/detail.cfm?mdrfoi__id=24313363&pc=OZD	02/04/2026			02/11/2026			02/04/2026	02/11/2026					02/11/2026		TEMPORARY NON-ROLLER TYPE LEFT HEART SUPPORT BLOOD PUMP			IMPELLA 5.5 WITH SMARTASSIST S2 SET, US			OZD						ABIOMED, INC. - 1220648			US		2026783742		000000000001000100		No			No		Yes	No	Health Professional			Manufacturer report
563	1220648-2026-02866	24313724	https://www.accessdata.fda.gov/scripts/cdrh/cfdocs/cfmaude/detail.cfm?mdrfoi__id=24313724&pc=OZD	02/03/2026			02/11/2026			02/03/2026	02/11/2026							TEMPORARY NON-ROLLER TYPE LEFT HEART SUPPORT BLOOD PUMP			IMPELLA 5.5 WITH SMARTASSIST S2 SET, US			OZD						ABIOMED, INC. - 1220648			US		2026811391		1000100		No			No		Yes	No	Health Professional			Manufacturer report
564	1220648-2026-02874	24314064	https://www.accessdata.fda.gov/scripts/cdrh/cfdocs/cfmaude/detail.cfm?mdrfoi__id=24314064&pc=OZD	10/22/2025			02/11/2026			10/22/2025	02/11/2026					02/11/2026		TEMPORARY NON-ROLLER TYPE LEFT HEART SUPPORT BLOOD PUMP			IMPELLA CONTROLLER, PACKAGED, US			OZD			IMPELLA CONTROLLER, PACKAGED, US			ABIOMED, INC. - 1220648			US		1157455		0042-0000-US		Device was returned to manufacturer			Yes		No	No	Health Professional			Manufacturer report
565	1035166-2026-00007	24314174	https://www.accessdata.fda.gov/scripts/cdrh/cfdocs/cfmaude/detail.cfm?mdrfoi__id=24314174&pc=DYB	01/12/2026	02/11/2026		02/11/2026			01/14/2026	02/11/2026					02/11/2026		INTRODUCER, CATHETER			INTRODUCER KIT FOR IMPELLA®			DYB			0052-3006			INTEGER HOLDINGS CORPORATION			US		S9649279		0052-3006		No			No		Yes	No	Health Professional			Manufacturer report
566	1220648-2026-02876	24314380	https://www.accessdata.fda.gov/scripts/cdrh/cfdocs/cfmaude/detail.cfm?mdrfoi__id=24314380&pc=OZD	01/29/2026			02/11/2026			01/30/2026	02/11/2026							TEMPORARY NON-ROLLER TYPE LEFT HEART SUPPORT BLOOD PUMP			IMPELLA 5.5 WITH SMARTASSIST S2 SET, US			OZD						ABIOMED, INC. - 1220648			US		2026798721		1000100		No			No		Yes	No	Health Professional			Manufacturer report
567	1220648-2026-02878	24314480	https://www.accessdata.fda.gov/scripts/cdrh/cfdocs/cfmaude/detail.cfm?mdrfoi__id=24314480&pc=OZD	02/05/2026			02/11/2026			02/05/2026	02/11/2026					02/11/2026		TEMPORARY NON-ROLLER TYPE LEFT HEART SUPPORT BLOOD PUMP			OPTICAL, AIC, IMPELLA CONNECT, PKGD, US			OZD						ABIOMED, INC. - 1220648			US		1639305		0042-0040-US		No			No		No	No	Health Professional			Manufacturer report
568	1220648-2026-02884	24315040	https://www.accessdata.fda.gov/scripts/cdrh/cfdocs/cfmaude/detail.cfm?mdrfoi__id=24315040&pc=OZD	02/05/2026			02/11/2026			02/05/2026	02/11/2026							TEMPORARY NON-ROLLER TYPE LEFT HEART SUPPORT BLOOD PUMP			OPTICAL, AIC, IMPELLA CONNECT, PKGD, US			OZD						ABIOMED, INC. - 1220648			US		1663431		0042-0040-US		Device was returned to manufacturer			No		No	No	Health Professional			Manufacturer report
569	1220648-2026-02905	24315743	https://www.accessdata.fda.gov/scripts/cdrh/cfdocs/cfmaude/detail.cfm?mdrfoi__id=24315743&pc=OZD	02/02/2026			02/11/2026			02/03/2026	02/11/2026					02/11/2026		TEMPORARY NON-ROLLER TYPE LEFT HEART SUPPORT BLOOD PUMP			IMPELLA CP SMART ASSIST SET, EU			OZD						ABIOMED, INC. - 1220648			US		2026721793		0048-0014		No			No		Yes	No	Health Professional			Manufacturer report
570	1220648-2026-02907	24315798	https://www.accessdata.fda.gov/scripts/cdrh/cfdocs/cfmaude/detail.cfm?mdrfoi__id=24315798&pc=OZD	02/06/2026			02/11/2026			02/06/2026	02/11/2026					02/11/2026		TEMPORARY NON-ROLLER TYPE LEFT HEART SUPPORT BLOOD PUMP			OPTICAL AIC W/IMPELLA CONNECT,PACK'D, EU			OZD						ABIOMED, INC. - 1220648			US		1649540		0042-0040-EU		Device was returned to manufacturer			No		No	No	Health Professional			Manufacturer report
571	1220648-2026-02908	24315808	https://www.accessdata.fda.gov/scripts/cdrh/cfdocs/cfmaude/detail.cfm?mdrfoi__id=24315808&pc=OZD	02/03/2026			02/11/2026			02/03/2026	02/11/2026			01/31/2026		02/11/2026		TEMPORARY NON-ROLLER TYPE LEFT HEART SUPPORT BLOOD PUMP			IMPELLA 5.5 WITH SMARTASSIST S2 SET, US			OZD						ABIOMED, INC. - 1220648			US		2025453876		1000100		No			No		Yes	No	Health Professional			Manufacturer report
572	1220648-2026-02913	24315947	https://www.accessdata.fda.gov/scripts/cdrh/cfdocs/cfmaude/detail.cfm?mdrfoi__id=24315947&pc=OZD	02/06/2026			02/11/2026			02/06/2026	02/11/2026					02/11/2026		TEMPORARY NON-ROLLER TYPE LEFT HEART SUPPORT BLOOD PUMP			OPTICAL, AIC, IMPELLA CONNECT, PKGD, US			OZD						ABIOMED, INC. - 1220648			US		1763601		0042-0040-US		No			No		No	No	Health Professional			Manufacturer report
573	1220648-2026-02912	24315948	https://www.accessdata.fda.gov/scripts/cdrh/cfdocs/cfmaude/detail.cfm?mdrfoi__id=24315948&pc=OZD	02/03/2026			02/11/2026			02/03/2026	02/11/2026					02/11/2026		TEMPORARY NON-ROLLER TYPE LEFT HEART SUPPORT BLOOD PUMP			OPTICAL, AIC, IMPELLA CONNECT, PKGD, US			OZD						ABIOMED, INC. - 1220648			US		1701427		0042-0040-US		No			No		No	No	Health Professional			Manufacturer report
574	1220648-2026-02917	24316301	https://www.accessdata.fda.gov/scripts/cdrh/cfdocs/cfmaude/detail.cfm?mdrfoi__id=24316301&pc=OZD	02/06/2026			02/11/2026			02/06/2026	02/11/2026							TEMPORARY NON-ROLLER TYPE LEFT HEART SUPPORT BLOOD PUMP			IMPELLA 5.5 WITH SMARTASSIST S2 SET, US			OZD						ABIOMED, INC. - 1220648			US		2026760974		1000100		No			No		Yes	No	Health Professional			Manufacturer report
575	1220648-2026-02918	24316480	https://www.accessdata.fda.gov/scripts/cdrh/cfdocs/cfmaude/detail.cfm?mdrfoi__id=24316480&pc=OZD	02/07/2026			02/11/2026			02/07/2026	02/11/2026							TEMPORARY NON-ROLLER TYPE LEFT HEART SUPPORT BLOOD PUMP			IMPELLA 5.5 WITH SMARTASSIST S2 SET, US			OZD						ABIOMED, INC. - 1220648			US		2026779283		1000100		No			No		Yes	No	Health Professional			Manufacturer report
576	1220648-2026-02920	24316615	https://www.accessdata.fda.gov/scripts/cdrh/cfdocs/cfmaude/detail.cfm?mdrfoi__id=24316615&pc=OZD	02/12/2026			02/11/2026			02/08/2026	02/11/2026					02/11/2026		TEMPORARY NON-ROLLER TYPE LEFT HEART SUPPORT BLOOD PUMP			IMPELLA 5.5 WITH SMARTASSIST S2 SET, US			OZD						ABIOMED, INC. - 1220648			US		2026775912		1000100		No			No		Yes	No	Health Professional			Manufacturer report
577	1220648-2026-02921	24316693	https://www.accessdata.fda.gov/scripts/cdrh/cfdocs/cfmaude/detail.cfm?mdrfoi__id=24316693&pc=OZD	02/06/2026			02/11/2026			02/06/2026	02/11/2026					02/11/2026		TEMPORARY NON-ROLLER TYPE LEFT HEART SUPPORT BLOOD PUMP			IMPELLA CONTROLLER, PACKAGED, US			OZD						ABIOMED, INC. - 1220648			US		1210713		0042-0000-US		No			No		No	No	Health Professional			Manufacturer report
578	1220648-2026-02927	24317654	https://www.accessdata.fda.gov/scripts/cdrh/cfdocs/cfmaude/detail.cfm?mdrfoi__id=24317654&pc=OZD	12/22/2025			02/11/2026			12/22/2025	02/11/2026					02/11/2026		TEMPORARY NON-ROLLER TYPE LEFT HEART SUPPORT BLOOD PUMP			IMPELLA CPSA C9+ SET, OUS			OZD			IMPELLA CPSA C9+ SET, OUS			ABIOMED, INC. - 1220648			US		2026750035		1000851		No			No		Yes	No	Health Professional			Manufacturer report
579	1220648-2026-02942	24318362	https://www.accessdata.fda.gov/scripts/cdrh/cfdocs/cfmaude/detail.cfm?mdrfoi__id=24318362&pc=OZD	12/15/2025	02/11/2026		02/11/2026			12/15/2025	02/11/2026					02/11/2026		TEMPORARY NON-ROLLER TYPE LEFT HEART SUPPORT BLOOD PUMP			IMPELLA 5.5 WITH SMARTASSIST S2 SET, US			OZD			IMPELLA 5.5 WITH SMARTASSIST S2 SET, US			ABIOMED, INC. - 1220648			US		2026781968		1000100		No			No		Yes	No	Health Professional			Manufacturer report
580	1220648-2026-02948	24319202	https://www.accessdata.fda.gov/scripts/cdrh/cfdocs/cfmaude/detail.cfm?mdrfoi__id=24319202&pc=OZD	02/05/2026	02/11/2026		02/11/2026			02/05/2026	02/11/2026					02/11/2026		TEMPORARY NON-ROLLER TYPE LEFT HEART SUPPORT BLOOD PUMP			IMPELLA 5.5 WITH SMARTASSIST S2 SET, US			OZD			IMPELLA 5.5 WITH SMARTASSIST S2 SET, US			ABIOMED, INC.			US		2026801796		1000100		Device was returned to manufacturer			No		Yes	No	Health Professional			Manufacturer report
581	1220648-2026-02950	24319235	https://www.accessdata.fda.gov/scripts/cdrh/cfdocs/cfmaude/detail.cfm?mdrfoi__id=24319235&pc=OZD	02/05/2026	02/24/2026		02/11/2026			02/05/2026	02/11/2026							TEMPORARY NON-ROLLER TYPE LEFT HEART SUPPORT BLOOD PUMP			IMPELLA CONTROLLER, PACKAGED, US			OZD			IMPELLA CONTROLLER, PACKAGED, US			ABIOMED, INC.			US		1379222		0042-0000-US		No			No		No	No	Health Professional			Manufacturer report
582	1220648-2026-02952	24319301	https://www.accessdata.fda.gov/scripts/cdrh/cfdocs/cfmaude/detail.cfm?mdrfoi__id=24319301&pc=OZD	02/05/2026	02/11/2026		02/11/2026			02/05/2026	02/11/2026					02/11/2026		TEMPORARY NON-ROLLER TYPE LEFT HEART SUPPORT BLOOD PUMP			IMPELLA CONTROLLER, PACKAGED, US			OZD			IMPELLA CONTROLLER, PACKAGED, US			ABIOMED, INC.			US		1102528		0042-0000-US		Device was returned to manufacturer			No		No	No	Health Professional			Manufacturer report
583	1220648-2026-02954	24319372	https://www.accessdata.fda.gov/scripts/cdrh/cfdocs/cfmaude/detail.cfm?mdrfoi__id=24319372&pc=OZD	02/05/2026	02/24/2026		02/11/2026			02/05/2026	02/11/2026					02/11/2026		TEMPORARY NON-ROLLER TYPE LEFT HEART SUPPORT BLOOD PUMP			IMPELLA 5.5 WITH SMARTASSIST S2 SET, EU			OZD			IMPELLA 5.5 WITH SMARTASSIST S2 SET, EU			ABIOMED, INC.			US		2025602801		1000482		No			No		Yes	No	Health Professional			Manufacturer report
584	1220648-2026-02675	24302461	https://www.accessdata.fda.gov/scripts/cdrh/cfdocs/cfmaude/detail.cfm?mdrfoi__id=24302461&pc=OZD	02/04/2026			02/10/2026			02/04/2026	02/10/2026							TEMPORARY NON-ROLLER TYPE LEFT HEART SUPPORT BLOOD PUMP			IMPELLA 5.5 WITH SMARTASSIST S2 SET, US			OZD						ABIOMED, INC. - 1220648			US		2026804270		1000100		No			No		Yes	No	Health Professional			Manufacturer report
585	1220648-2026-02678	24302590	https://www.accessdata.fda.gov/scripts/cdrh/cfdocs/cfmaude/detail.cfm?mdrfoi__id=24302590&pc=OZD	02/04/2026			02/10/2026			02/04/2026	02/10/2026							TEMPORARY NON-ROLLER TYPE LEFT HEART SUPPORT BLOOD PUMP			IMPELLA 5.5 WITH SMARTASSIST S2 SET, US			OZD						ABIOMED, INC. - 1220648			US		2026802395		1000100		No			No		Yes	No	Health Professional			Manufacturer report
586	1220648-2026-02680	24302856	https://www.accessdata.fda.gov/scripts/cdrh/cfdocs/cfmaude/detail.cfm?mdrfoi__id=24302856&pc=OZD	01/31/2026			02/10/2026			02/04/2026	02/10/2026							TEMPORARY NON-ROLLER TYPE LEFT HEART SUPPORT BLOOD PUMP			IMPELLA OPTICAL CONTROLLER, PACKAGED, US			OZD						ABIOMED, INC. - 1220648			US		1438724		0042-0010-US		No			No		No	No	Health Professional			Manufacturer report
587	1220648-2026-02682	24302929	https://www.accessdata.fda.gov/scripts/cdrh/cfdocs/cfmaude/detail.cfm?mdrfoi__id=24302929&pc=OZD	02/04/2026			02/10/2026			02/04/2026	02/10/2026							TEMPORARY NON-ROLLER TYPE LEFT HEART SUPPORT BLOOD PUMP			IMPELLA 5.5 WITH SMARTASSIST S2 SET, US			OZD						ABIOMED, INC. - 1220648			US		2026737113		1000100		No			No		Yes	No	Health Professional			Manufacturer report
588	1220648-2026-02683	24302973	https://www.accessdata.fda.gov/scripts/cdrh/cfdocs/cfmaude/detail.cfm?mdrfoi__id=24302973&pc=OZD	02/04/2026			02/10/2026			02/04/2026	02/10/2026					02/10/2026		TEMPORARY NON-ROLLER TYPE LEFT HEART SUPPORT BLOOD PUMP			IMPELLA 5.5 WITH SMARTASSIST S2 SET, US			OZD						ABIOMED, INC. - 1220648			US		2026805672		1000100		Device was returned to manufacturer			No		Yes	No	Health Professional			Manufacturer report
589	1220648-2026-02685	24303052	https://www.accessdata.fda.gov/scripts/cdrh/cfdocs/cfmaude/detail.cfm?mdrfoi__id=24303052&pc=OZD	01/30/2026			02/10/2026			02/01/2026	02/10/2026							TEMPORARY NON-ROLLER TYPE LEFT HEART SUPPORT BLOOD PUMP			IMPELLA CONTROLLER, PACKAGED, EU			OZD						ABIOMED, INC. - 1220648			US		1200543		0042-0000-EU		No			No		No	No	Health Professional			Manufacturer report
590	1220648-2026-02684	24303071	https://www.accessdata.fda.gov/scripts/cdrh/cfdocs/cfmaude/detail.cfm?mdrfoi__id=24303071&pc=OZD	02/04/2026			02/10/2026			02/04/2026	02/10/2026					02/10/2026		TEMPORARY NON-ROLLER TYPE LEFT HEART SUPPORT BLOOD PUMP			IMPELLA 5.5 WITH SMARTASSIST S2 SET, US			OZD						ABIOMED, INC. - 1220648			US		2026805575		1000100		No			No		Yes	No	Health Professional			Manufacturer report
591	1220648-2026-02686	24303072	https://www.accessdata.fda.gov/scripts/cdrh/cfdocs/cfmaude/detail.cfm?mdrfoi__id=24303072&pc=OZD	01/30/2026			02/10/2026			01/30/2026	02/10/2026					02/10/2026		TEMPORARY NON-ROLLER TYPE LEFT HEART SUPPORT BLOOD PUMP			IMPELLA 5.5 WITH SMARTASSIST S2 SET, US			OZD						ABIOMED, INC. - 1220648			US		2026731324		000000000001000100		No			No		Yes	No	Health Professional			Manufacturer report
592	1220648-2026-02687	24303097	https://www.accessdata.fda.gov/scripts/cdrh/cfdocs/cfmaude/detail.cfm?mdrfoi__id=24303097&pc=OZD	01/29/2026			02/10/2026			01/29/2026	02/10/2026					02/10/2026		TEMPORARY NON-ROLLER TYPE LEFT HEART SUPPORT BLOOD PUMP			IMPELLA CONTROLLER, PACKAGED, US			OZD						ABIOMED, INC. - 1220648			US		1366755		0042-0000-US		No			No		No	No	Health Professional			Manufacturer report
593	1220648-2026-02690	24303207	https://www.accessdata.fda.gov/scripts/cdrh/cfdocs/cfmaude/detail.cfm?mdrfoi__id=24303207&pc=OZD	02/04/2026	02/10/2026		02/10/2026			02/04/2026	02/10/2026					02/10/2026		TEMPORARY NON-ROLLER TYPE LEFT HEART SUPPORT BLOOD PUMP			IMPELLA 5.5 WITH SMARTASSIST S2 SET, US			OZD			IMPELLA 5.5 WITH SMARTASSIST S2 SET, US			ABIOMED, INC. - 1220648			US		2026691065		1000100		No			No		Yes	No	Health Professional			Manufacturer report
594	1220648-2026-02689	24303210	https://www.accessdata.fda.gov/scripts/cdrh/cfdocs/cfmaude/detail.cfm?mdrfoi__id=24303210&pc=OZD	01/28/2026			02/10/2026			01/28/2026	02/10/2026							TEMPORARY NON-ROLLER TYPE LEFT HEART SUPPORT BLOOD PUMP			IMPELLA 5.5 WITH SMARTASSIST S2 SET, US			OZD						ABIOMED, INC. - 1220648			US		2026775981		000000000001000100		No			No		Yes	No	Health Professional			Manufacturer report
595	1220648-2026-02692	24303245	https://www.accessdata.fda.gov/scripts/cdrh/cfdocs/cfmaude/detail.cfm?mdrfoi__id=24303245&pc=OZD	10/31/2025			02/10/2026			01/21/2026	02/10/2026					02/10/2026		TEMPORARY NON-ROLLER TYPE LEFT HEART SUPPORT BLOOD PUMP			OPTICAL, AIC, IMPELLA CONNECT, PKGD, US			OZD						ABIOMED, INC. - 1220648			US		1849119		0042-0040-US		No			No		No	No	Health Professional			Manufacturer report
596	1220648-2026-02693	24303284	https://www.accessdata.fda.gov/scripts/cdrh/cfdocs/cfmaude/detail.cfm?mdrfoi__id=24303284&pc=OZD	02/04/2026			02/10/2026			02/04/2026	02/10/2026					02/10/2026		TEMPORARY NON-ROLLER TYPE LEFT HEART SUPPORT BLOOD PUMP			IMPELLA CONTROLLER, PACKAGED, EU			OZD						ABIOMED, INC. - 1220648			US		1263482		0042-0000-EU		No			No		No	No	Health Professional			Manufacturer report
597	1220648-2026-02697	24303360	https://www.accessdata.fda.gov/scripts/cdrh/cfdocs/cfmaude/detail.cfm?mdrfoi__id=24303360&pc=OZD	02/02/2026			02/10/2026			02/02/2026	02/10/2026					02/10/2026		TEMPORARY NON-ROLLER TYPE LEFT HEART SUPPORT BLOOD PUMP			IMPELLA CONTROLLER, PACKAGED, EU			OZD						ABIOMED, INC. - 1220648			US		1226867		0042-0000-EU		No			No		No	No	Health Professional			Manufacturer report
598	1220648-2026-02699	24303398	https://www.accessdata.fda.gov/scripts/cdrh/cfdocs/cfmaude/detail.cfm?mdrfoi__id=24303398&pc=OZD	01/27/2026			02/10/2026			02/01/2026	02/10/2026					02/10/2026		TEMPORARY NON-ROLLER TYPE LEFT HEART SUPPORT BLOOD PUMP			IMPELLA CONTROLLER, PACKAGED, US			OZD						ABIOMED, INC. - 1220648			US		1129860		0042-0000-US		No			No		No	No	Health Professional			Manufacturer report
599	1220648-2026-02705	24303508	https://www.accessdata.fda.gov/scripts/cdrh/cfdocs/cfmaude/detail.cfm?mdrfoi__id=24303508&pc=OZD	02/02/2026			02/10/2026			02/02/2026	02/10/2026					02/10/2026		TEMPORARY NON-ROLLER TYPE LEFT HEART SUPPORT BLOOD PUMP			IMPELLA CPSA C9+ SET, OUS			OZD						ABIOMED, INC. - 1220648			US		2026783085		000000000001000851		No			No		Yes	No	Health Professional			Manufacturer report
600	1220648-2026-02709	24303534	https://www.accessdata.fda.gov/scripts/cdrh/cfdocs/cfmaude/detail.cfm?mdrfoi__id=24303534&pc=OZD	02/01/2026			02/10/2026			02/02/2026	02/10/2026							TEMPORARY NON-ROLLER TYPE LEFT HEART SUPPORT BLOOD PUMP			IMPELLA CPSA C9+ SET, OUS			OZD						ABIOMED, INC. - 1220648			US		2026764485		1000851		Device was returned to manufacturer			No		Yes	No	Health Professional			Manufacturer report
601	1220648-2026-02717	24303648	https://www.accessdata.fda.gov/scripts/cdrh/cfdocs/cfmaude/detail.cfm?mdrfoi__id=24303648&pc=OZD	02/02/2026			02/10/2026			02/02/2026	02/10/2026							TEMPORARY NON-ROLLER TYPE LEFT HEART SUPPORT BLOOD PUMP			IMPELLA 5.5 WITH SMARTASSIST S2 SET, US			OZD						ABIOMED, INC. - 1220648			US		2026701085		000000000001000100		No			No		Yes	No	Health Professional			Manufacturer report
602	1220648-2026-02722	24303728	https://www.accessdata.fda.gov/scripts/cdrh/cfdocs/cfmaude/detail.cfm?mdrfoi__id=24303728&pc=OZD	01/31/2026			02/10/2026			02/01/2026	02/10/2026							TEMPORARY NON-ROLLER TYPE LEFT HEART SUPPORT BLOOD PUMP			IMPELLA 5.5 WITH SMARTASSIST S2 SET, US			OZD						ABIOMED, INC. - 1220648			US		2026729306		000000000001000100		No			No		Yes	No	Health Professional			Manufacturer report
603	1220648-2026-02725	24303891	https://www.accessdata.fda.gov/scripts/cdrh/cfdocs/cfmaude/detail.cfm?mdrfoi__id=24303891&pc=OZD	01/30/2026			02/10/2026			01/30/2026	02/10/2026							TEMPORARY NON-ROLLER TYPE LEFT HEART SUPPORT BLOOD PUMP			IMPELLA 5.5 WITH SMARTASSIST S2 SET, US			OZD						ABIOMED, INC. - 1220648			US		2026766873		000000000001000100		No			No		Yes	No	Health Professional			Manufacturer report
604	1220648-2026-02727	24303903	https://www.accessdata.fda.gov/scripts/cdrh/cfdocs/cfmaude/detail.cfm?mdrfoi__id=24303903&pc=OZD	01/27/2026			02/10/2026			01/28/2026	02/10/2026							TEMPORARY NON-ROLLER TYPE LEFT HEART SUPPORT BLOOD PUMP			IMPELLA 5.5 WITH SMARTASSIST S2 SET, US			OZD						ABIOMED, INC. - 1220648			US		2026783688		000000000001000100		No			No			No	Health Professional			Manufacturer report
605	1220648-2026-02729	24303916	https://www.accessdata.fda.gov/scripts/cdrh/cfdocs/cfmaude/detail.cfm?mdrfoi__id=24303916&pc=OZD	02/04/2026			02/10/2026			02/04/2026	02/10/2026					02/10/2026		TEMPORARY NON-ROLLER TYPE LEFT HEART SUPPORT BLOOD PUMP			IMPELLA 5.5 WITH SMARTASSIST S2 SET, US			OZD						ABIOMED, INC. - 1220648			US		2026809807		000000000001000100		No			No		Yes	No	Health Professional			Manufacturer report
606	1220648-2026-02737	24304259	https://www.accessdata.fda.gov/scripts/cdrh/cfdocs/cfmaude/detail.cfm?mdrfoi__id=24304259&pc=OZD	02/04/2026			02/10/2026			02/04/2026	02/10/2026							TEMPORARY NON-ROLLER TYPE LEFT HEART SUPPORT BLOOD PUMP			IMPELLA 5.5 WITH SMARTASSIST S2 SET, US			OZD						ABIOMED, INC. - 1220648			US		2026806949		1000100		No			No		Yes	No	Health Professional			Manufacturer report
607	1220648-2026-02745	24304526	https://www.accessdata.fda.gov/scripts/cdrh/cfdocs/cfmaude/detail.cfm?mdrfoi__id=24304526&pc=OZD	10/30/2025			02/10/2026			10/30/2025	02/10/2026					02/10/2026		TEMPORARY NON-ROLLER TYPE LEFT HEART SUPPORT BLOOD PUMP			IMPELLA 5.5 WITH SMARTASSIST S2 SET, US			OZD			IMPELLA 5.5 WITH SMARTASSIST S2 SET, US			ABIOMED, INC. - 1220648			US		2026728914		000000000001000100		No			No		Yes	Y	Health Professional			Manufacturer report
608	1220648-2026-02746	24304541	https://www.accessdata.fda.gov/scripts/cdrh/cfdocs/cfmaude/detail.cfm?mdrfoi__id=24304541&pc=OZD	02/04/2026			02/10/2026			02/04/2026	02/10/2026					02/10/2026		TEMPORARY NON-ROLLER TYPE LEFT HEART SUPPORT BLOOD PUMP			IMPELLA CONTROLLER, PACKAGED, US			OZD						ABIOMED, INC. - 1220648			US		1105809		0042-0000-US		No			No		No	No	Health Professional			Manufacturer report
609	1220648-2026-02749	24304754	https://www.accessdata.fda.gov/scripts/cdrh/cfdocs/cfmaude/detail.cfm?mdrfoi__id=24304754&pc=OZD	01/26/2026			02/10/2026			01/28/2026	02/10/2026					02/10/2026		TEMPORARY NON-ROLLER TYPE LEFT HEART SUPPORT BLOOD PUMP			IMPELLA OPTICAL CONTROLLER, PACKAGED, EU			OZD						ABIOMED, INC. - 1220648			US		1432278		0042-0010-EU		No			No		No	No	Health Professional			Manufacturer report
610	1220648-2026-02752	24304804	https://www.accessdata.fda.gov/scripts/cdrh/cfdocs/cfmaude/detail.cfm?mdrfoi__id=24304804&pc=OZD	10/24/2025			02/10/2026			10/24/2025	02/10/2026					02/10/2026		TEMPORARY NON-ROLLER TYPE LEFT HEART SUPPORT BLOOD PUMP			IMPELLA 5.5 WITH SMARTASSIST S2 SET, US			OZD			IMPELLA 5.5 WITH SMARTASSIST S2 SET, US			ABIOMED, INC. - 1220648			US		2026744171		000000000001000100		No			No		Yes	No	Health Professional			Manufacturer report
611	1220648-2025-48599	24304975	https://www.accessdata.fda.gov/scripts/cdrh/cfdocs/cfmaude/detail.cfm?mdrfoi__id=24304975&pc=OZD	10/26/2025	11/24/2025		02/10/2026			10/26/2025	02/10/2026					02/10/2026		TEMPORARY NON-ROLLER TYPE LEFT HEART SUPPORT BLOOD PUMP			IMPELLA CP			OZD			IMPELLA CP			ABIOMED, INC.			US		2026722236		000000000001000080		No			No		Yes	No	Health Professional			Manufacturer report
612	1220648-2026-02756	24304985	https://www.accessdata.fda.gov/scripts/cdrh/cfdocs/cfmaude/detail.cfm?mdrfoi__id=24304985&pc=OZD	02/03/2026			02/10/2026			02/03/2026	02/10/2026							TEMPORARY NON-ROLLER TYPE LEFT HEART SUPPORT BLOOD PUMP			IMPELLA 5.5			OZD						ABIOMED, INC. - 1220648			US		2026748981		1000100		No			No		Yes	No	Health Professional			Manufacturer report
613	1220648-2026-02759	24305114	https://www.accessdata.fda.gov/scripts/cdrh/cfdocs/cfmaude/detail.cfm?mdrfoi__id=24305114&pc=OZD	02/02/2026			02/10/2026			02/05/2026	02/10/2026							TEMPORARY NON-ROLLER TYPE LEFT HEART SUPPORT BLOOD PUMP			IMPELLA 5.5			OZD						ABIOMED, INC. - 1220648			US		2026780314		1000100		No			No		Yes	No	Health Professional			Manufacturer report
614	1220648-2026-02760	24305250	https://www.accessdata.fda.gov/scripts/cdrh/cfdocs/cfmaude/detail.cfm?mdrfoi__id=24305250&pc=OZD	02/05/2026			02/10/2026			02/05/2026	02/10/2026					02/10/2026		TEMPORARY NON-ROLLER TYPE LEFT HEART SUPPORT BLOOD PUMP			AUTOMATED IMPELLA CONTROLLER			OZD						ABIOMED EUROPE GMBH - 3007904765			GM		1383039		0042-0000-JP		Device was returned to manufacturer			No		No	No	Health Professional			Manufacturer report
615	1220648-2026-02762	24305393	https://www.accessdata.fda.gov/scripts/cdrh/cfdocs/cfmaude/detail.cfm?mdrfoi__id=24305393&pc=OZD	02/02/2026			02/10/2026			02/05/2026	02/10/2026					02/10/2026		TEMPORARY NON-ROLLER TYPE LEFT HEART SUPPORT BLOOD PUMP			IMPELLA 5.5			OZD						ABIOMED, INC. - 1220648			US		2026805259		1000459		No			No		Yes	No	Health Professional			Manufacturer report
616	1220648-2026-02763	24305397	https://www.accessdata.fda.gov/scripts/cdrh/cfdocs/cfmaude/detail.cfm?mdrfoi__id=24305397&pc=OZD	10/27/2025			02/10/2026			10/27/2025	02/10/2026					02/10/2026		TEMPORARY NON-ROLLER TYPE LEFT HEART SUPPORT BLOOD PUMP			IMPELLA 5.5 WITH SMARTASSIST S2 SET, US			OZD			IMPELLA 5.5 WITH SMARTASSIST S2 SET, US			ABIOMED, INC. - 1220648			US		2026744977		000000000001000100		No			No		Yes	No	Health Professional			Manufacturer report
617	1220648-2026-02764	24305404	https://www.accessdata.fda.gov/scripts/cdrh/cfdocs/cfmaude/detail.cfm?mdrfoi__id=24305404&pc=OZD	10/28/2025			02/10/2026			10/28/2025	02/10/2026					02/10/2026		TEMPORARY NON-ROLLER TYPE LEFT HEART SUPPORT BLOOD PUMP			IMPELLA CP			OZD			IMPELLA CP			ABIOMED, INC. - 1220648			US		2026756399		000000000001000080		No			No		No	No	Health Professional			Manufacturer report
618	1220648-2026-02765	24305498	https://www.accessdata.fda.gov/scripts/cdrh/cfdocs/cfmaude/detail.cfm?mdrfoi__id=24305498&pc=OZD	10/28/2025			02/10/2026			10/28/2025	02/10/2026					02/10/2026		TEMPORARY NON-ROLLER TYPE LEFT HEART SUPPORT BLOOD PUMP			IMPELLA 5.5			OZD			IMPELLA 5.5			ABIOMED, INC.			US		2026733805		000000000001000100		No			No		No	No	Health Professional			Manufacturer report
619	1220648-2026-02783	24306178	https://www.accessdata.fda.gov/scripts/cdrh/cfdocs/cfmaude/detail.cfm?mdrfoi__id=24306178&pc=OZD	02/04/2026			02/10/2026			02/04/2026	02/10/2026					02/10/2026		TEMPORARY NON-ROLLER TYPE LEFT HEART SUPPORT BLOOD PUMP			IMPELLA 5.5 WITH SMARTASSIST S2 SET, US			OZD						ABIOMED, INC. - 1220648			US		2026765805		1000100		No			No		Yes	No	Health Professional			Manufacturer report
620	1220648-2026-02786	24306552	https://www.accessdata.fda.gov/scripts/cdrh/cfdocs/cfmaude/detail.cfm?mdrfoi__id=24306552&pc=OZD	02/04/2026			02/10/2026			02/04/2026	02/10/2026					02/10/2026		TEMPORARY NON-ROLLER TYPE LEFT HEART SUPPORT BLOOD PUMP			OPTICAL, AIC, IMPELLA CONNECT, PKGD, US			OZD						ABIOMED, INC. - 1220648			US		1914207		0042-0040-US		No			No		No	No	Health Professional			Manufacturer report
621	1220648-2026-02787	24306553	https://www.accessdata.fda.gov/scripts/cdrh/cfdocs/cfmaude/detail.cfm?mdrfoi__id=24306553&pc=OZD	02/04/2026			02/10/2026			02/04/2026	02/10/2026					02/10/2026		TEMPORARY NON-ROLLER TYPE LEFT HEART SUPPORT BLOOD PUMP			IMPELLA 5.5 WITH SMARTASSIST S2 SET, US			OZD						ABIOMED, INC. - 1220648			US		2026782188		1000100		No			No		Yes	No	Health Professional			Manufacturer report
622	1220648-2026-02788	24306562	https://www.accessdata.fda.gov/scripts/cdrh/cfdocs/cfmaude/detail.cfm?mdrfoi__id=24306562&pc=OZD	02/05/2026			02/10/2026			02/05/2026	02/10/2026							TEMPORARY NON-ROLLER TYPE LEFT HEART SUPPORT BLOOD PUMP			IMPELLA OPTICAL CONTROLLER, PACKAGED, US			OZD						ABIOMED, INC. - 1220648			US		1455140		0042-0010-US		Device was returned to manufacturer			No		No	No	Health Professional			Manufacturer report
623	1220648-2026-02789	24306974	https://www.accessdata.fda.gov/scripts/cdrh/cfdocs/cfmaude/detail.cfm?mdrfoi__id=24306974&pc=OZD	01/30/2026			02/10/2026			02/02/2026	02/10/2026					02/10/2026		TEMPORARY NON-ROLLER TYPE LEFT HEART SUPPORT BLOOD PUMP			IMPELLA 5.5 SMARTASSIST S2 SET, JP			OZD						ABIOMED, INC. - 1220648			US		2026810030		1000459		No			No		Yes	No	Health Professional			Manufacturer report
624	1220648-2026-02795	24307350	https://www.accessdata.fda.gov/scripts/cdrh/cfdocs/cfmaude/detail.cfm?mdrfoi__id=24307350&pc=OZD	02/05/2026			02/10/2026			02/05/2026	02/10/2026							TEMPORARY NON-ROLLER TYPE LEFT HEART SUPPORT BLOOD PUMP			IMPELLA CONTROLLER, PACKAGED, US			OZD						ABIOMED, INC. - 1220648			US		1124582		0042-0000-US		No			No		No	No	Health Professional			Manufacturer report
625	1220648-2026-02796	24307369	https://www.accessdata.fda.gov/scripts/cdrh/cfdocs/cfmaude/detail.cfm?mdrfoi__id=24307369&pc=OZD	02/04/2026	02/10/2026		02/10/2026			02/04/2026	02/10/2026					02/10/2026		TEMPORARY NON-ROLLER TYPE LEFT HEART SUPPORT BLOOD PUMP			IMPELLA 5.5 WITH SMARTASSIST S2 SET, US			OZD			IMPELLA 5.5 WITH SMARTASSIST S2 SET, US			ABIOMED, INC. - 1220648			US		2026806220		1000100		Device was returned to manufacturer			No		Yes	No	Health Professional			Manufacturer report
626	1220648-2026-02799	24307551	https://www.accessdata.fda.gov/scripts/cdrh/cfdocs/cfmaude/detail.cfm?mdrfoi__id=24307551&pc=OZD	02/02/2026			02/10/2026			02/02/2026	02/10/2026					02/10/2026		TEMPORARY NON-ROLLER TYPE LEFT HEART SUPPORT BLOOD PUMP			IMPELLA 5.5 WITH SMARTASSIST S2 SET, US			OZD						ABIOMED, INC. - 1220648			US		2026803425		1000100		No			No		Yes	No	Health Professional			Manufacturer report
627	1220648-2026-02804	24307748	https://www.accessdata.fda.gov/scripts/cdrh/cfdocs/cfmaude/detail.cfm?mdrfoi__id=24307748&pc=OZD	01/13/2026	02/10/2026		02/10/2026			01/13/2026	02/10/2026							TEMPORARY NON-ROLLER TYPE LEFT HEART SUPPORT BLOOD PUMP			IMPELLA 5.5 WITH SMARTASSIST S2 SET, US			OZD			IMPELLA 5.5 WITH SMARTASSIST S2 SET, US			ABIOMED, INC. - 1220648			US		2026764628		1000100		No			No		Yes	No	Health Professional			Manufacturer report
628	1220648-2026-02803	24307795	https://www.accessdata.fda.gov/scripts/cdrh/cfdocs/cfmaude/detail.cfm?mdrfoi__id=24307795&pc=OZD	01/30/2026			02/10/2026			02/02/2026	02/10/2026					02/10/2026		TEMPORARY NON-ROLLER TYPE LEFT HEART SUPPORT BLOOD PUMP			OPTICAL AIC W/IMPELLA CONNECT,PACK'D, EU			OZD						ABIOMED, INC. - 1220648			US		1839845		0042-0040-EU		No			No		Yes	No	Health Professional			Manufacturer report
629	1220648-2026-02808	24308106	https://www.accessdata.fda.gov/scripts/cdrh/cfdocs/cfmaude/detail.cfm?mdrfoi__id=24308106&pc=OZD	02/03/2026			02/10/2026			02/03/2026	02/10/2026							TEMPORARY NON-ROLLER TYPE LEFT HEART SUPPORT BLOOD PUMP			IMPELLA 5.5 WITH SMARTASSIST S2 SET, US			OZD						ABIOMED, INC. - 1220648			US		2026802379		1000100		No			No		Yes	No	Health Professional			Manufacturer report
630	1220648-2026-02817	24308496	https://www.accessdata.fda.gov/scripts/cdrh/cfdocs/cfmaude/detail.cfm?mdrfoi__id=24308496&pc=OZD	12/22/2025			02/10/2026			12/22/2025	02/10/2026					02/10/2026		TEMPORARY NON-ROLLER TYPE LEFT HEART SUPPORT BLOOD PUMP			IMPELLA 5.5 WITH SMARTASSIST S2 SET, US			OZD			IMPELLA 5.5 WITH SMARTASSIST S2 SET, US			ABIOMED, INC. - 1220648			US		2026733576		1000100		No			No		Yes	No	Health Professional			Manufacturer report
631	1220648-2026-02819	24309149	https://www.accessdata.fda.gov/scripts/cdrh/cfdocs/cfmaude/detail.cfm?mdrfoi__id=24309149&pc=OZD	02/02/2026			02/10/2026			02/02/2026	02/10/2026							TEMPORARY NON-ROLLER TYPE LEFT HEART SUPPORT BLOOD PUMP			IMPELLA CONTROLLER, PACKAGED, US			OZD						ABIOMED, INC. - 1220648			US		1133367		0042-0000-US		Device was returned to manufacturer			No		No	No	Health Professional			Manufacturer report
632	1220648-2026-02826	24310464	https://www.accessdata.fda.gov/scripts/cdrh/cfdocs/cfmaude/detail.cfm?mdrfoi__id=24310464&pc=OZD	11/03/2025			02/10/2026			11/04/2025	02/10/2026					02/10/2026		TEMPORARY NON-ROLLER TYPE LEFT HEART SUPPORT BLOOD PUMP			IMPELLA 5.5 WITH SMARTASSIST S2 SET, EU			OZD			IMPELLA 5.5 WITH SMARTASSIST S2 SET, EU			ABIOMED, INC.			US		2026705343		1000482		No			No		Yes	No	Health Professional			Manufacturer report
633	1220648-2026-02531	24290241	https://www.accessdata.fda.gov/scripts/cdrh/cfdocs/cfmaude/detail.cfm?mdrfoi__id=24290241&pc=OZD	02/02/2026			02/09/2026			02/02/2026	02/09/2026					02/09/2026		TEMPORARY NON-ROLLER TYPE LEFT HEART SUPPORT BLOOD PUMP			IMPELLA CONTROLLER, PACKAGED, US			OZD						ABIOMED, INC. - 1220648			US		1095486		0042-0000-US		Device was returned to manufacturer			No		No	No	Health Professional			Manufacturer report
634	1220648-2026-02533	24290316	https://www.accessdata.fda.gov/scripts/cdrh/cfdocs/cfmaude/detail.cfm?mdrfoi__id=24290316&pc=OZD	02/01/2026			02/09/2026			02/02/2026	02/09/2026			01/31/2026		02/09/2026		TEMPORARY NON-ROLLER TYPE LEFT HEART SUPPORT BLOOD PUMP			IMPELLA 5.5 WITH SMARTASSIST S2 SET, US			OZD						ABIOMED, INC. - 1220648			US		2025461506		1000100		No			No		Yes	No	Health Professional			Manufacturer report
635	1220648-2026-02534	24290320	https://www.accessdata.fda.gov/scripts/cdrh/cfdocs/cfmaude/detail.cfm?mdrfoi__id=24290320&pc=OZD	01/31/2026			02/09/2026			01/31/2026	02/09/2026							TEMPORARY NON-ROLLER TYPE LEFT HEART SUPPORT BLOOD PUMP			IMPELLA 5.5 WITH SMARTASSIST S2 SET, US			OZD						ABIOMED, INC. - 1220648			US		2026802655		000000000001000100		No			No		Yes	No	Health Professional			Manufacturer report
636	1220648-2026-02535	24290334	https://www.accessdata.fda.gov/scripts/cdrh/cfdocs/cfmaude/detail.cfm?mdrfoi__id=24290334&pc=OZD	01/23/2026			02/09/2026			01/30/2026	02/09/2026					02/09/2026		TEMPORARY NON-ROLLER TYPE LEFT HEART SUPPORT BLOOD PUMP			IMPELLA 5.5 WITH SMARTASSIST S2 SET, EU			OZD						ABIOMED, INC. - 1220648			US		2026798483		000000000001000482		No			No		Yes	No	Health Professional			Manufacturer report
637	1220648-2026-02536	24290370	https://www.accessdata.fda.gov/scripts/cdrh/cfdocs/cfmaude/detail.cfm?mdrfoi__id=24290370&pc=OZD	01/29/2026			02/09/2026			01/29/2026	02/09/2026							TEMPORARY NON-ROLLER TYPE LEFT HEART SUPPORT BLOOD PUMP			IMPELLA 5.5 WITH SMARTASSIST S2 SET, US			OZD						ABIOMED, INC. - 1220648			US		2026746109		000000000001000100		No			No		Yes	No	Health Professional			Manufacturer report
638	1220648-2026-02537	24290386	https://www.accessdata.fda.gov/scripts/cdrh/cfdocs/cfmaude/detail.cfm?mdrfoi__id=24290386&pc=OZD	01/25/2026			02/09/2026			01/25/2026	02/09/2026							TEMPORARY NON-ROLLER TYPE LEFT HEART SUPPORT BLOOD PUMP			IMPELLA CPSA C9+ SET, OUS			OZD						ABIOMED, INC. - 1220648			US		2026778651		000000000001000851		No			No		Yes	No	Health Professional			Manufacturer report
639	1220648-2026-02538	24290396	https://www.accessdata.fda.gov/scripts/cdrh/cfdocs/cfmaude/detail.cfm?mdrfoi__id=24290396&pc=OZD	02/02/2026			02/09/2026			02/02/2026	02/09/2026					02/09/2026		TEMPORARY NON-ROLLER TYPE LEFT HEART SUPPORT BLOOD PUMP			IMPELLA 5.5 WITH SMARTASSIST S2 SET, US			OZD						ABIOMED, INC. - 1220648			US		2026745082		1000100		No			No		Yes	No	Health Professional			Manufacturer report
640	1220648-2026-02542	24290538	https://www.accessdata.fda.gov/scripts/cdrh/cfdocs/cfmaude/detail.cfm?mdrfoi__id=24290538&pc=OZD	01/28/2026			02/09/2026			01/28/2026	02/09/2026							TEMPORARY NON-ROLLER TYPE LEFT HEART SUPPORT BLOOD PUMP			IMPELLA 5.5 WITH SMARTASSIST S2 SET, EU			OZD						ABIOMED, INC. - 1220648			US		2026789751		000000000001000482		No			No		Yes	No	Health Professional			Manufacturer report
641	1220648-2026-02544	24290590	https://www.accessdata.fda.gov/scripts/cdrh/cfdocs/cfmaude/detail.cfm?mdrfoi__id=24290590&pc=OZD	01/31/2026			02/09/2026			01/31/2026	02/09/2026							TEMPORARY NON-ROLLER TYPE LEFT HEART SUPPORT BLOOD PUMP			IMPELLA 5.5 WITH SMARTASSIST S2 SET, US			OZD						ABIOMED, INC. - 1220648			US		2026799966		000000000001000100		No			No		Yes	No	Health Professional			Manufacturer report
642	1220648-2026-02545	24290616	https://www.accessdata.fda.gov/scripts/cdrh/cfdocs/cfmaude/detail.cfm?mdrfoi__id=24290616&pc=OZD	01/31/2026			02/09/2026			02/01/2026	02/09/2026					02/09/2026		TEMPORARY NON-ROLLER TYPE LEFT HEART SUPPORT BLOOD PUMP			IMPELLA CP SMART ASSIST SET, JP			OZD						ABIOMED, INC. - 1220648			US		2026782789		0048-0024-JP		No			No		Yes	No	Health Professional			Manufacturer report
643	1220648-2026-02547	24290824	https://www.accessdata.fda.gov/scripts/cdrh/cfdocs/cfmaude/detail.cfm?mdrfoi__id=24290824&pc=OZD	02/02/2026			02/09/2026			02/02/2026	02/09/2026							TEMPORARY NON-ROLLER TYPE LEFT HEART SUPPORT BLOOD PUMP			IMPELLA 5.5 WITH SMARTASSIST S2 SET, US			OZD						ABIOMED, INC. - 1220648			US		2026798738		000000000001000100		No			No		Yes	No	Health Professional			Manufacturer report
644	1220648-2026-02551	24290982	https://www.accessdata.fda.gov/scripts/cdrh/cfdocs/cfmaude/detail.cfm?mdrfoi__id=24290982&pc=OZD	02/02/2026			02/09/2026			02/03/2026	02/09/2026					02/09/2026		TEMPORARY NON-ROLLER TYPE LEFT HEART SUPPORT BLOOD PUMP			IMPELLA 5.5 WITH SMARTASSIST S2 SET, US			OZD						ABIOMED, INC. - 1220648			US		2026802441		000000000001000100		No			No		Yes	No	Health Professional			Manufacturer report
645	1220648-2026-02557	24291576	https://www.accessdata.fda.gov/scripts/cdrh/cfdocs/cfmaude/detail.cfm?mdrfoi__id=24291576&pc=OZD	01/29/2026			02/09/2026			01/30/2026	02/09/2026							TEMPORARY NON-ROLLER TYPE LEFT HEART SUPPORT BLOOD PUMP			IMPELLA 5.5 WITH SMARTASSIST S2 SET, US			OZD						ABIOMED, INC. - 1220648			US		2025571895		1000100		No			No		Yes	No	Health Professional			Manufacturer report
646	1220648-2026-02558	24291589	https://www.accessdata.fda.gov/scripts/cdrh/cfdocs/cfmaude/detail.cfm?mdrfoi__id=24291589&pc=OZD	02/02/2026			02/09/2026			02/02/2026	02/09/2026					02/09/2026		TEMPORARY NON-ROLLER TYPE LEFT HEART SUPPORT BLOOD PUMP			IMPELLA 5.5 WITH SMARTASSIST S2 SET, US			OZD						ABIOMED, INC. - 1220648			US		2026795750		1000100		No			No		Yes	No	Health Professional			Manufacturer report
647	1220648-2026-02563	24291746	https://www.accessdata.fda.gov/scripts/cdrh/cfdocs/cfmaude/detail.cfm?mdrfoi__id=24291746&pc=OZD	02/02/2026	02/09/2026		02/09/2026			02/02/2026	02/09/2026							TEMPORARY NON-ROLLER TYPE LEFT HEART SUPPORT BLOOD PUMP			IMPELLA 5.5 WITH SMARTASSIST S2 SET, US			OZD			IMPELLA 5.5 WITH SMARTASSIST S2 SET, US			ABIOMED, INC. - 1220648			US		2026806916		1000100		No			No		Yes	No	Health Professional			Manufacturer report
648	1220648-2026-02565	24291897	https://www.accessdata.fda.gov/scripts/cdrh/cfdocs/cfmaude/detail.cfm?mdrfoi__id=24291897&pc=OZD	02/03/2026			02/09/2026			02/03/2026	02/09/2026					02/09/2026		TEMPORARY NON-ROLLER TYPE LEFT HEART SUPPORT BLOOD PUMP			IMPELLA 5.5 WITH SMARTASSIST S2 SET, US			OZD						ABIOMED, INC. - 1220648			US		2026797226		1000100		No			No		Yes	No	Health Professional			Manufacturer report
649	1220648-2026-02567	24291975	https://www.accessdata.fda.gov/scripts/cdrh/cfdocs/cfmaude/detail.cfm?mdrfoi__id=24291975&pc=OZD	02/03/2026			02/09/2026			02/03/2026	02/09/2026							TEMPORARY NON-ROLLER TYPE LEFT HEART SUPPORT BLOOD PUMP			IMPELLA 5.5 WITH SMARTASSIST S2 SET, US			OZD						ABIOMED, INC. - 1220648			US		2026797225		1000100		No			No		Yes	No	Health Professional			Manufacturer report
650	1220648-2026-02575	24292157	https://www.accessdata.fda.gov/scripts/cdrh/cfdocs/cfmaude/detail.cfm?mdrfoi__id=24292157&pc=PYX	02/01/2026	02/09/2026		02/09/2026			02/02/2026	02/09/2026					02/09/2026		TEMPORARY NON-ROLLER TYPE RIGHT HEART SUPPORT BLOOD PUMP			IMPELLA RP PUMP SET, EU			PYX			IMPELLA RP PUMP SET, EU			ABIOMED, INC. - 1220648			US		2025593625		0046-0011		No			No		Yes	No	Health Professional			Manufacturer report
651	1220648-2026-02578	24292314	https://www.accessdata.fda.gov/scripts/cdrh/cfdocs/cfmaude/detail.cfm?mdrfoi__id=24292314&pc=OZD	01/30/2026			02/09/2026			01/30/2026	02/09/2026					02/09/2026		TEMPORARY NON-ROLLER TYPE LEFT HEART SUPPORT BLOOD PUMP			IMPELLA 5.5 WITH SMARTASSIST S2 SET, US			OZD						ABIOMED, INC. - 1220648			US		2026775744		1000100		No			No		Yes	No	Health Professional			Manufacturer report
652	1220648-2026-02585	24292594	https://www.accessdata.fda.gov/scripts/cdrh/cfdocs/cfmaude/detail.cfm?mdrfoi__id=24292594&pc=OZD	01/30/2026			02/09/2026			01/30/2026	02/09/2026							TEMPORARY NON-ROLLER TYPE LEFT HEART SUPPORT BLOOD PUMP			IMPELLA 5.5 WITH SMARTASSIST S2 SET, US			OZD						ABIOMED, INC. - 1220648			US		2026795404		1000100		No			No		Yes	No	Health Professional			Manufacturer report
653	1220648-2026-02582	24292597	https://www.accessdata.fda.gov/scripts/cdrh/cfdocs/cfmaude/detail.cfm?mdrfoi__id=24292597&pc=OZD	01/30/2026			02/09/2026			01/30/2026	02/09/2026					02/09/2026		TEMPORARY NON-ROLLER TYPE LEFT HEART SUPPORT BLOOD PUMP			IMPELLA 5.5 WITH SMARTASSIST S2 SET, US			OZD						ABIOMED, INC. - 1220648			US		2026796313		1000100		No			No		Yes	No	Health Professional			Manufacturer report
654	1220648-2026-02586	24292605	https://www.accessdata.fda.gov/scripts/cdrh/cfdocs/cfmaude/detail.cfm?mdrfoi__id=24292605&pc=OZD	02/01/2026	02/09/2026		02/09/2026			02/02/2026	02/09/2026					02/09/2026		TEMPORARY NON-ROLLER TYPE LEFT HEART SUPPORT BLOOD PUMP			IMPELLA CPSA C9+ SET, OUS			OZD			IMPELLA CPSA C9+ SET, OUS			ABIOMED, INC. - 1220648			US		2026807801		1000851		No			No		Yes	No	Health Professional			Manufacturer report
655	1220648-2026-02590	24292716	https://www.accessdata.fda.gov/scripts/cdrh/cfdocs/cfmaude/detail.cfm?mdrfoi__id=24292716&pc=OZD	02/02/2026	02/09/2026		02/09/2026			02/02/2026	02/09/2026							TEMPORARY NON-ROLLER TYPE LEFT HEART SUPPORT BLOOD PUMP			IMPELLA 5.5 WITH SMARTASSIST S2 SET, US			OZD			IMPELLA 5.5 WITH SMARTASSIST S2 SET, US			ABIOMED, INC. - 1220648			US		2026774605		1000100		No			No		Yes	No	Health Professional			Manufacturer report
656	1220648-2026-02594	24292832	https://www.accessdata.fda.gov/scripts/cdrh/cfdocs/cfmaude/detail.cfm?mdrfoi__id=24292832&pc=OZD	02/01/2026	02/09/2026		02/09/2026			02/02/2026	02/09/2026							TEMPORARY NON-ROLLER TYPE LEFT HEART SUPPORT BLOOD PUMP			IMPELLA 5.5 WITH SMARTASSIST S2 SET, US			OZD			IMPELLA 5.5 WITH SMARTASSIST S2 SET, US			ABIOMED, INC. - 1220648			US		2026796297		1000100		No			No		Yes	No	Health Professional			Manufacturer report
657	1220648-2026-02595	24292853	https://www.accessdata.fda.gov/scripts/cdrh/cfdocs/cfmaude/detail.cfm?mdrfoi__id=24292853&pc=OZD	02/03/2026			02/09/2026			02/03/2026	02/09/2026					02/09/2026		TEMPORARY NON-ROLLER TYPE LEFT HEART SUPPORT BLOOD PUMP			IMPELLA 5.5 WITH SMARTASSIST S2 SET, US			OZD						ABIOMED, INC. - 1220648			US		2026809838		1000100		No			No		No	No	Health Professional			Manufacturer report
658	1220648-2026-02597	24292950	https://www.accessdata.fda.gov/scripts/cdrh/cfdocs/cfmaude/detail.cfm?mdrfoi__id=24292950&pc=OZD	02/02/2026			02/09/2026			02/03/2026	02/09/2026					02/09/2026		TEMPORARY NON-ROLLER TYPE LEFT HEART SUPPORT BLOOD PUMP			IMPELLA CP			OZD						ABIOMED, INC. - 1220648			US		2026812155		1000851		Device was returned to manufacturer			No		Yes	No	Health Professional			Manufacturer report
659	1220648-2026-02562	24292974	https://www.accessdata.fda.gov/scripts/cdrh/cfdocs/cfmaude/detail.cfm?mdrfoi__id=24292974&pc=OZD	02/01/2026	02/09/2026		02/09/2026			02/02/2026	02/09/2026							TEMPORARY NON-ROLLER TYPE LEFT HEART SUPPORT BLOOD PUMP			IMPELLA 5.5 WITH SMARTASSIST S2 SET, US			OZD						ABIOMED, INC. - 1220648			US				1000100		No			No		Yes	No	Health Professional			Manufacturer report
660	1220648-2026-02599	24293085	https://www.accessdata.fda.gov/scripts/cdrh/cfdocs/cfmaude/detail.cfm?mdrfoi__id=24293085&pc=OZD	10/31/2025	02/27/2026		02/09/2026			10/31/2025	02/09/2026					02/09/2026		TEMPORARY NON-ROLLER TYPE LEFT HEART SUPPORT BLOOD PUMP			IMPELLA 5.5 WITH SMARTASSIST S2 SET, US			OZD			IMPELLA 5.5 WITH SMARTASSIST S2 SET, US			ABIOMED, INC. - 1220648			US		2026741023		1000100		No			No		Yes	No	Health Professional			Manufacturer report
661	1220648-2026-02601	24293121	https://www.accessdata.fda.gov/scripts/cdrh/cfdocs/cfmaude/detail.cfm?mdrfoi__id=24293121&pc=OZD	02/02/2026	02/09/2026		02/09/2026			02/02/2026	02/09/2026							TEMPORARY NON-ROLLER TYPE LEFT HEART SUPPORT BLOOD PUMP			IMPELLA 5.5 WITH SMARTASSIST S2 SET, US			OZD						ABIOMED, INC. - 1220648			US		2026689082		1000100		No			No		Yes	No	Health Professional			Manufacturer report
662	1220648-2026-02615	24295172	https://www.accessdata.fda.gov/scripts/cdrh/cfdocs/cfmaude/detail.cfm?mdrfoi__id=24295172&pc=OZD	02/02/2026	02/09/2026		02/09/2026			02/02/2026	02/09/2026					02/09/2026		TEMPORARY NON-ROLLER TYPE LEFT HEART SUPPORT BLOOD PUMP			IMPELLA 5.5 WITH SMARTASSIST S2 SET, US			OZD			IMPELLA 5.5 WITH SMARTASSIST S2 SET, US			ABIOMED, INC. - 1220648			US		2026655577		1000100		No			No		Yes	No	Health Professional			Manufacturer report
663	1220648-2026-02618	24295559	https://www.accessdata.fda.gov/scripts/cdrh/cfdocs/cfmaude/detail.cfm?mdrfoi__id=24295559&pc=OZD	01/31/2026	02/09/2026		02/09/2026			01/31/2026	02/09/2026							TEMPORARY NON-ROLLER TYPE LEFT HEART SUPPORT BLOOD PUMP			IMPELLA 5.5 WITH SMARTASSIST S2 SET, US			OZD			IMPELLA 5.5 WITH SMARTASSIST S2 SET, US			ABIOMED, INC.			US		2026705948		1000100		No			No		Yes	No	Health Professional			Manufacturer report
664	1220648-2026-02621	24295736	https://www.accessdata.fda.gov/scripts/cdrh/cfdocs/cfmaude/detail.cfm?mdrfoi__id=24295736&pc=OZD	01/22/2026			02/09/2026			01/22/2026	02/09/2026					02/09/2026		TEMPORARY NON-ROLLER TYPE LEFT HEART SUPPORT BLOOD PUMP			IMPELLA 5.5 WITH SMARTASSIST S2 SET, US			OZD						ABIOMED, INC.			US		2026775869		000000000001000100		No			No		Yes	No	Health Professional			Manufacturer report
665	1220648-2026-02622	24295879	https://www.accessdata.fda.gov/scripts/cdrh/cfdocs/cfmaude/detail.cfm?mdrfoi__id=24295879&pc=OZD	10/24/2025			02/09/2026			10/24/2025	02/09/2026					02/09/2026		TEMPORARY NON-ROLLER TYPE LEFT HEART SUPPORT BLOOD PUMP			IMPELLA CP			OZD			IMPELLA CP			ABIOMED, INC.			US		2026703539		000000000001000080		No			No		Yes	No	Health Professional			Manufacturer report
666	1220648-2026-02623	24295922	https://www.accessdata.fda.gov/scripts/cdrh/cfdocs/cfmaude/detail.cfm?mdrfoi__id=24295922&pc=OZD	02/02/2026	02/09/2026		02/09/2026			02/02/2026	02/09/2026					02/09/2026		TEMPORARY NON-ROLLER TYPE LEFT HEART SUPPORT BLOOD PUMP			IMPELLA 5.5 WITH SMARTASSIST S2 SET, US			OZD			IMPELLA 5.5 WITH SMARTASSIST S2 SET, US			ABIOMED, INC. - 1220648			US		2026796263		1000100		No			No		Yes	No	Health Professional			Manufacturer report
667	1220648-2026-02637	24297566	https://www.accessdata.fda.gov/scripts/cdrh/cfdocs/cfmaude/detail.cfm?mdrfoi__id=24297566&pc=OZD	02/02/2026			02/09/2026			02/02/2026	02/09/2026					02/09/2026		TEMPORARY NON-ROLLER TYPE LEFT HEART SUPPORT BLOOD PUMP			IMPELLA CONTROLLER, PACKAGED, US			OZD						ABIOMED, INC. - 1220648			US		1186531		0042-0000-US		Device was returned to manufacturer			No		No	No	Health Professional			Manufacturer report
668	1220648-2026-02648	24298311	https://www.accessdata.fda.gov/scripts/cdrh/cfdocs/cfmaude/detail.cfm?mdrfoi__id=24298311&pc=OZD	02/01/2026	02/09/2026		02/09/2026			02/01/2026	02/09/2026							TEMPORARY NON-ROLLER TYPE LEFT HEART SUPPORT BLOOD PUMP			IMPELLA 5.5 WITH SMARTASSIST S2 SET, US			OZD			IMPELLA 5.5 WITH SMARTASSIST S2 SET, US			ABIOMED, INC.			US		2026795340		1000100		No			No		Yes	No	Health Professional			Manufacturer report
669	1220648-2026-02651	24298426	https://www.accessdata.fda.gov/scripts/cdrh/cfdocs/cfmaude/detail.cfm?mdrfoi__id=24298426&pc=OZD	02/01/2026	02/09/2026		02/09/2026			02/01/2026	02/09/2026							TEMPORARY NON-ROLLER TYPE LEFT HEART SUPPORT BLOOD PUMP			IMPELLA 5.5 WITH SMARTASSIST S2 SET, US			OZD			IMPELLA 5.5 WITH SMARTASSIST S2 SET, US			ABIOMED, INC.			US		2026756820		1000100		No			No		Yes	No	Health Professional			Manufacturer report
670	1220648-2026-02656	24298587	https://www.accessdata.fda.gov/scripts/cdrh/cfdocs/cfmaude/detail.cfm?mdrfoi__id=24298587&pc=OZD	02/01/2026	02/09/2026		02/09/2026			02/01/2026	02/09/2026					02/09/2026		TEMPORARY NON-ROLLER TYPE LEFT HEART SUPPORT BLOOD PUMP			IMPELLA 5.5 WITH SMARTASSIST S2 SET, US			OZD			IMPELLA 5.5 WITH SMARTASSIST S2 SET, US			ABIOMED, INC.			US		2026775831		1000100		No			No		Yes	No	Health Professional			Manufacturer report
671	1220648-2026-02518	24288288	https://www.accessdata.fda.gov/scripts/cdrh/cfdocs/cfmaude/detail.cfm?mdrfoi__id=24288288&pc=OZD	02/02/2026			02/08/2026			02/02/2026	02/08/2026							TEMPORARY NON-ROLLER TYPE LEFT HEART SUPPORT BLOOD PUMP			IMPELLA 5.5 WITH SMARTASSIST S2 SET, US			OZD						ABIOMED, INC. - 1220648			US		2026785129		000000000001000100		No			No		Yes	No	Health Professional			Manufacturer report
672	1220648-2026-02519	24288292	https://www.accessdata.fda.gov/scripts/cdrh/cfdocs/cfmaude/detail.cfm?mdrfoi__id=24288292&pc=OZD	01/31/2026			02/08/2026			02/02/2026	02/08/2026							TEMPORARY NON-ROLLER TYPE LEFT HEART SUPPORT BLOOD PUMP			IMPELLA 5.5 WITH SMARTASSIST S2 SET, US			OZD						ABIOMED, INC. - 1220648			US		2026806203		000000000001000100		No			No		Yes	No	Health Professional			Manufacturer report
673	1220648-2026-02521	24288325	https://www.accessdata.fda.gov/scripts/cdrh/cfdocs/cfmaude/detail.cfm?mdrfoi__id=24288325&pc=OZD	02/01/2026			02/08/2026			02/02/2026	02/08/2026					02/08/2026		TEMPORARY NON-ROLLER TYPE LEFT HEART SUPPORT BLOOD PUMP			IMPELLA CONTROLLER, PACKAGED, US			OZD						ABIOMED, INC. - 1220648			US		1288546		0042-0000-US		No			No		No	No	Health Professional			Manufacturer report
674	1220648-2026-02522	24288329	https://www.accessdata.fda.gov/scripts/cdrh/cfdocs/cfmaude/detail.cfm?mdrfoi__id=24288329&pc=OZD	02/02/2026			02/08/2026			02/02/2026	02/08/2026							TEMPORARY NON-ROLLER TYPE LEFT HEART SUPPORT BLOOD PUMP			IMPELLA 5.5 WITH SMARTASSIST S2 SET, US			OZD						ABIOMED, INC. - 1220648			US		2026802406		000000000001000100		No			No		Yes	No	Health Professional			Manufacturer report
675	1220648-2026-02525	24288346	https://www.accessdata.fda.gov/scripts/cdrh/cfdocs/cfmaude/detail.cfm?mdrfoi__id=24288346&pc=OZD	02/02/2026			02/08/2026			02/02/2026	02/08/2026							TEMPORARY NON-ROLLER TYPE LEFT HEART SUPPORT BLOOD PUMP			IMPELLA CONTROLLER, PACKAGED, US			OZD						ABIOMED, INC. - 1220648			US		1138943		0042-0000-US		No			No		No	No	Health Professional			Manufacturer report
676	1220648-2026-02527	24288420	https://www.accessdata.fda.gov/scripts/cdrh/cfdocs/cfmaude/detail.cfm?mdrfoi__id=24288420&pc=OZD	01/13/2026			02/08/2026			01/13/2026	02/08/2026							TEMPORARY NON-ROLLER TYPE LEFT HEART SUPPORT BLOOD PUMP			IMPELLA 5.5 WITH SMARTASSIST S2 SET, US			OZD						ABIOMED, INC.			US		2026795549		000000000001000100		No			No		Yes	No	Health Professional			Manufacturer report
677	1220648-2026-02511	24285688	https://www.accessdata.fda.gov/scripts/cdrh/cfdocs/cfmaude/detail.cfm?mdrfoi__id=24285688&pc=OZD	02/01/2026	02/07/2026		02/07/2026			02/01/2026	02/07/2026					02/07/2026		TEMPORARY NON-ROLLER TYPE LEFT HEART SUPPORT BLOOD PUMP			IMPELLA 5.5 WITH SMARTASSIST S2 SET, US			OZD			IMPELLA 5.5 WITH SMARTASSIST S2 SET, US			ABIOMED, INC. - 1220648			US		2026744142		1000100		No			No		Yes		Health Professional			Manufacturer report
678	1220648-2026-02512	24285693	https://www.accessdata.fda.gov/scripts/cdrh/cfdocs/cfmaude/detail.cfm?mdrfoi__id=24285693&pc=OZD	02/01/2026	02/07/2026		02/07/2026			02/01/2026	02/07/2026					02/07/2026		TEMPORARY NON-ROLLER TYPE LEFT HEART SUPPORT BLOOD PUMP			OPTICAL, AIC, IMPELLA CONNECT, PKGD, US			OZD			OPTICAL, AIC, IMPELLA CONNECT, PKGD, US			ABIOMED, INC. - 1220648			US		1914207		0042-0040-US		Device was returned to manufacturer			No		No	No	Health Professional			Manufacturer report
679	1220648-2026-02513	24285694	https://www.accessdata.fda.gov/scripts/cdrh/cfdocs/cfmaude/detail.cfm?mdrfoi__id=24285694&pc=OZD	02/01/2026	02/07/2026		02/07/2026			02/01/2026	02/07/2026							TEMPORARY NON-ROLLER TYPE LEFT HEART SUPPORT BLOOD PUMP			IMPELLA CPSA C9+ SET, OUS			OZD			IMPELLA CPSA C9+ SET, OUS			ABIOMED, INC. - 1220648			US		2026799246		1000851		No			No		Yes	No	Health Professional			Manufacturer report
680	1220648-2026-02514	24285756	https://www.accessdata.fda.gov/scripts/cdrh/cfdocs/cfmaude/detail.cfm?mdrfoi__id=24285756&pc=OZD	01/31/2026	02/07/2026		02/07/2026			02/01/2026	02/07/2026							TEMPORARY NON-ROLLER TYPE LEFT HEART SUPPORT BLOOD PUMP			IMPELLA CP SMART ASSIST SET, JP			OZD			IMPELLA CP SMART ASSIST SET, JP			ABIOMED, INC. - 1220648			US		2026735734		0048-0024-JP		No			No		Yes	No	Health Professional			Manufacturer report
681	1220648-2026-02516	24285760	https://www.accessdata.fda.gov/scripts/cdrh/cfdocs/cfmaude/detail.cfm?mdrfoi__id=24285760&pc=OZD	02/02/2026	02/07/2026		02/07/2026			02/02/2026	02/07/2026					02/07/2026		TEMPORARY NON-ROLLER TYPE LEFT HEART SUPPORT BLOOD PUMP			IMPELLA CONTROLLER, PACKAGED, CA			OZD			IMPELLA CONTROLLER, PACKAGED, CA			ABIOMED, INC. - 1220648			US		1096255		0042-0000-CA		Device was returned to manufacturer			No		No	No	Health Professional			Manufacturer report
682	1220648-2026-02517	24285763	https://www.accessdata.fda.gov/scripts/cdrh/cfdocs/cfmaude/detail.cfm?mdrfoi__id=24285763&pc=OZD	02/02/2026	02/07/2026		02/07/2026			02/02/2026	02/07/2026							TEMPORARY NON-ROLLER TYPE LEFT HEART SUPPORT BLOOD PUMP			IMPELLA 5.5 WITH SMARTASSIST S2 SET, US			OZD			IMPELLA 5.5 WITH SMARTASSIST S2 SET, US			ABIOMED, INC. - 1220648			US		2026747670		1000100		No			No		Yes	No	Health Professional			Manufacturer report
683	1220648-2026-02416	24277028	https://www.accessdata.fda.gov/scripts/cdrh/cfdocs/cfmaude/detail.cfm?mdrfoi__id=24277028&pc=OZD	11/05/2025			02/06/2026			11/05/2025	02/06/2026					02/06/2026		TEMPORARY NON-ROLLER TYPE LEFT HEART SUPPORT BLOOD PUMP			IMPELLA 5.5 WITH SMARTASSIST S2 SET, US			OZD						ABIOMED, INC. - 1220648			US		2026755775		1000100		No			No		Yes	No	Health Professional			Manufacturer report
684	1220648-2026-02417	24277031	https://www.accessdata.fda.gov/scripts/cdrh/cfdocs/cfmaude/detail.cfm?mdrfoi__id=24277031&pc=OZD	01/27/2026			02/06/2026			01/27/2026	02/06/2026					02/06/2026		TEMPORARY NON-ROLLER TYPE LEFT HEART SUPPORT BLOOD PUMP			IMPELLA CONTROLLER, PACKAGED, US			OZD						ABIOMED, INC. - 1220648			US		1085765		0042-0000-US		No			No		No	No	Health Professional			Manufacturer report
685	1220648-2026-02420	24277364	https://www.accessdata.fda.gov/scripts/cdrh/cfdocs/cfmaude/detail.cfm?mdrfoi__id=24277364&pc=OZD	01/29/2026			02/06/2026			01/29/2026	02/06/2026					02/06/2026		TEMPORARY NON-ROLLER TYPE LEFT HEART SUPPORT BLOOD PUMP			IMPELLA OPTICAL CONTROLLER, PACKAGED, US			OZD						ABIOMED, INC. - 1220648			US		1337720		0042-0010-US		No			No		No	No	Health Professional			Manufacturer report
686	1220648-2026-02422	24277419	https://www.accessdata.fda.gov/scripts/cdrh/cfdocs/cfmaude/detail.cfm?mdrfoi__id=24277419&pc=OZD	01/27/2026			02/06/2026			01/27/2026	02/06/2026							TEMPORARY NON-ROLLER TYPE LEFT HEART SUPPORT BLOOD PUMP			IMPELLA 5.5 WITH SMARTASSIST S2 SET, US			OZD						ABIOMED, INC. - 1220648			US		2026779521		000000000001000100		No			No		Yes	No	Health Professional			Manufacturer report
687	1220648-2026-02423	24277465	https://www.accessdata.fda.gov/scripts/cdrh/cfdocs/cfmaude/detail.cfm?mdrfoi__id=24277465&pc=OZD	01/26/2026			02/06/2026			01/28/2026	02/06/2026					02/06/2026		TEMPORARY NON-ROLLER TYPE LEFT HEART SUPPORT BLOOD PUMP			IMPELLA OPTICAL CONTROLLER, PACKAGED, EU			OZD						ABIOMED, INC. - 1220648			US		1626081		0042-0010-EU		No			No		No	No	Health Professional			Manufacturer report
688	1220648-2026-02428	24277597	https://www.accessdata.fda.gov/scripts/cdrh/cfdocs/cfmaude/detail.cfm?mdrfoi__id=24277597&pc=OZD	01/28/2026			02/06/2026			01/28/2026	02/06/2026							TEMPORARY NON-ROLLER TYPE LEFT HEART SUPPORT BLOOD PUMP			IMPELLA 5.5 WITH SMARTASSIST S2 SET, US			OZD						ABIOMED, INC. - 1220648			US		2026738973		000000000001000100		No			No		Yes	No	Health Professional			Manufacturer report
689	1220648-2026-02433	24277741	https://www.accessdata.fda.gov/scripts/cdrh/cfdocs/cfmaude/detail.cfm?mdrfoi__id=24277741&pc=OZD	01/30/2026			02/06/2026			01/30/2026	02/06/2026					02/06/2026		TEMPORARY NON-ROLLER TYPE LEFT HEART SUPPORT BLOOD PUMP			IMPELLA OPTICAL CONTROLLER, PACKAGED, US			OZD						ABIOMED, INC. - 1220648			US		1407754		0042-0010-US		Device was returned to manufacturer			No		No	No	Health Professional			Manufacturer report
690	24277811	24277811	https://www.accessdata.fda.gov/scripts/cdrh/cfdocs/cfmaude/detail.cfm?mdrfoi__id=24277811&pc=OZD	01/08/2026	01/26/2026	02/02/2026	02/06/2026	02/02/2026	02/06/2026		02/06/2026					02/06/2026		TEMPORARY NON-ROLLER TYPE LEFT HEART SUPPORT BLOOD PUMP			IMPELLA			OZD			IMPELLA CP			ABIOMED, INC.			US				4000021		No			Not Available			No				User Facility report
691	1220648-2026-02435	24277829	https://www.accessdata.fda.gov/scripts/cdrh/cfdocs/cfmaude/detail.cfm?mdrfoi__id=24277829&pc=OZD	01/29/2026			02/06/2026			01/30/2026	02/06/2026							TEMPORARY NON-ROLLER TYPE LEFT HEART SUPPORT BLOOD PUMP			IMPELLA 5.5 WITH SMARTASSIST S2 SET, US			OZD						ABIOMED, INC. - 1220648			US		2026781120		1000100		No			No		Yes	No	Health Professional			Manufacturer report
692	1220648-2026-02441	24277938	https://www.accessdata.fda.gov/scripts/cdrh/cfdocs/cfmaude/detail.cfm?mdrfoi__id=24277938&pc=OZD	01/29/2026			02/06/2026			01/30/2026	02/06/2026					02/06/2026		TEMPORARY NON-ROLLER TYPE LEFT HEART SUPPORT BLOOD PUMP			IMPELLA 5.5 WITH SMARTASSIST S2 SET, US			OZD						ABIOMED, INC. - 1220648			US		2026781170		1000100		No			No		Yes	No	Health Professional			Manufacturer report
693	1220648-2026-02444	24278031	https://www.accessdata.fda.gov/scripts/cdrh/cfdocs/cfmaude/detail.cfm?mdrfoi__id=24278031&pc=OZD	01/31/2026			02/06/2026			01/31/2026	02/06/2026					02/06/2026		TEMPORARY NON-ROLLER TYPE LEFT HEART SUPPORT BLOOD PUMP			IMPELLA 5.5 WITH SMARTASSIST S2 SET, US			OZD						ABIOMED, INC. - 1220648			US		2026798742		000000000001000100		No			No		Yes	No	Health Professional			Manufacturer report
694	1220648-2026-02446	24278084	https://www.accessdata.fda.gov/scripts/cdrh/cfdocs/cfmaude/detail.cfm?mdrfoi__id=24278084&pc=OZD	01/31/2026			02/06/2026			01/31/2026	02/06/2026					02/06/2026		TEMPORARY NON-ROLLER TYPE LEFT HEART SUPPORT BLOOD PUMP			IMPELLA 5.5 WITH SMARTASSIST S2 SET, US			OZD						ABIOMED, INC. - 1220648			US		2026773826		000000000001000100		No			No		Yes	No	Health Professional			Manufacturer report
695	24278163	24278163	https://www.accessdata.fda.gov/scripts/cdrh/cfdocs/cfmaude/detail.cfm?mdrfoi__id=24278163&pc=OZD	07/01/2025	02/02/2026	02/02/2026	02/06/2026	02/02/2026	02/06/2026		02/06/2026					02/06/2026		TEMPORARY NON-ROLLER TYPE LEFT HEART SUPPORT BLOOD PUMP			IMPELLA			OZD			IMPELLA CP			ABIOMED INC			US				4000021		No			Not Available			No				User Facility report
696	1220648-2026-02453	24279268	https://www.accessdata.fda.gov/scripts/cdrh/cfdocs/cfmaude/detail.cfm?mdrfoi__id=24279268&pc=OZD	12/04/2025			02/06/2026			12/04/2025	02/06/2026					02/06/2026		TEMPORARY NON-ROLLER TYPE LEFT HEART SUPPORT BLOOD PUMP			IMPELLA 5.5 WITH SMARTASSIST S2 SET, US			OZD			IMPELLA 5.5 WITH SMARTASSIST S2 SET, US			ABIOMED, INC. - 1220648			US		2025571160		1000100		No			No		Yes	No	Health Professional			Manufacturer report
697	1220648-2026-02454	24279291	https://www.accessdata.fda.gov/scripts/cdrh/cfdocs/cfmaude/detail.cfm?mdrfoi__id=24279291&pc=OZD	01/30/2026			02/06/2026			01/30/2026	02/06/2026					02/06/2026		TEMPORARY NON-ROLLER TYPE LEFT HEART SUPPORT BLOOD PUMP			IMPELLA 5.5 WITH SMARTASSIST S2 SET, US			OZD						ABIOMED, INC. - 1220648			US		2026771309		1000100		No			No		Yes	No	Health Professional			Manufacturer report
698	1220648-2026-02456	24279456	https://www.accessdata.fda.gov/scripts/cdrh/cfdocs/cfmaude/detail.cfm?mdrfoi__id=24279456&pc=OZD	01/29/2026	02/06/2026		02/06/2026			01/29/2026	02/06/2026							TEMPORARY NON-ROLLER TYPE LEFT HEART SUPPORT BLOOD PUMP			IMPELLA 5.5 WITH SMARTASSIST S2 SET, US			OZD			IMPELLA 5.5 WITH SMARTASSIST S2 SET, US			ABIOMED, INC. - 1220648			US		2026781119		1000100		No			No		Yes	No	Health Professional			Manufacturer report
699	1220648-2026-02460	24279824	https://www.accessdata.fda.gov/scripts/cdrh/cfdocs/cfmaude/detail.cfm?mdrfoi__id=24279824&pc=OZD	01/28/2026			02/06/2026			01/28/2026	02/06/2026					02/06/2026		TEMPORARY NON-ROLLER TYPE LEFT HEART SUPPORT BLOOD PUMP			IMPELLA CONTROLLER, PACKAGED, US			OZD						ABIOMED, INC. - 1220648			US		1117560		0042-0000-US		Device was returned to manufacturer			No		No	No	Health Professional			Manufacturer report
700	1220648-2026-02461	24279858	https://www.accessdata.fda.gov/scripts/cdrh/cfdocs/cfmaude/detail.cfm?mdrfoi__id=24279858&pc=OZD	02/01/2026	02/06/2026		02/06/2026			02/01/2026	02/06/2026					02/06/2026		TEMPORARY NON-ROLLER TYPE LEFT HEART SUPPORT BLOOD PUMP			IMPELLA 5.5 WITH SMARTASSIST S2 SET, US			OZD			IMPELLA 5.5 WITH SMARTASSIST S2 SET, US			ABIOMED, INC. - 1220648			US		2025563969		1000100		No			No		Yes	No	Health Professional			Manufacturer report
701	1220648-2026-02463	24279914	https://www.accessdata.fda.gov/scripts/cdrh/cfdocs/cfmaude/detail.cfm?mdrfoi__id=24279914&pc=OZD	01/30/2026			02/06/2026			01/30/2026	02/06/2026							TEMPORARY NON-ROLLER TYPE LEFT HEART SUPPORT BLOOD PUMP			IMPELLA CONTROLLER, PACKAGED, US			OZD						ABIOMED, INC. - 1220648			US		1254075		0042-0000-US		No			No		No	No	Health Professional			Manufacturer report
702	1220648-2026-02464	24280059	https://www.accessdata.fda.gov/scripts/cdrh/cfdocs/cfmaude/detail.cfm?mdrfoi__id=24280059&pc=OZD	02/01/2026	02/06/2026		02/06/2026			02/01/2026	02/06/2026					02/06/2026		TEMPORARY NON-ROLLER TYPE LEFT HEART SUPPORT BLOOD PUMP			IMPELLA 5.5 WITH SMARTASSIST S2 SET, US			OZD			IMPELLA 5.5 WITH SMARTASSIST S2 SET, US			ABIOMED, INC. - 1220648			US		2026746068		1000100		No			No		Yes	No	Health Professional			Manufacturer report
703	1220648-2026-02466	24280143	https://www.accessdata.fda.gov/scripts/cdrh/cfdocs/cfmaude/detail.cfm?mdrfoi__id=24280143&pc=OZD	01/28/2026			02/06/2026			01/29/2026	02/06/2026					02/06/2026		TEMPORARY NON-ROLLER TYPE LEFT HEART SUPPORT BLOOD PUMP			IMPELLA 5.5 SMARTASSIST S2 SET, JP			OZD						ABIOMED, INC. - 1220648			US		2026797927		1000459		No			No		Yes	No	Health Professional			Manufacturer report
704	1220648-2026-02467	24280154	https://www.accessdata.fda.gov/scripts/cdrh/cfdocs/cfmaude/detail.cfm?mdrfoi__id=24280154&pc=OZD	02/01/2026	02/06/2026		02/06/2026			02/01/2026	02/06/2026					02/06/2026		TEMPORARY NON-ROLLER TYPE LEFT HEART SUPPORT BLOOD PUMP			IMPELLA CONTROLLER, PACKAGED, US			OZD			IMPELLA CONTROLLER, PACKAGED, US			ABIOMED, INC. - 1220648			US		1129859		0042-0000-US		No			No		Yes	No	Health Professional			Manufacturer report
705	1220648-2026-02468	24280308	https://www.accessdata.fda.gov/scripts/cdrh/cfdocs/cfmaude/detail.cfm?mdrfoi__id=24280308&pc=OZD	01/25/2026			02/06/2026			01/27/2026	02/06/2026							TEMPORARY NON-ROLLER TYPE LEFT HEART SUPPORT BLOOD PUMP			IMPELLA CPSA C9+ SET, OUS			OZD						ABIOMED, INC. - 1220648			US		2026806256		1000851		No			No		Yes	No	Health Professional			Manufacturer report
706	1220648-2026-02479	24282586	https://www.accessdata.fda.gov/scripts/cdrh/cfdocs/cfmaude/detail.cfm?mdrfoi__id=24282586&pc=OZD	01/29/2026			02/06/2026			01/29/2026	02/06/2026							TEMPORARY NON-ROLLER TYPE LEFT HEART SUPPORT BLOOD PUMP			OPTICAL, AIC, IMPELLA CONNECT, PKGD, US			OZD						ABIOMED, INC. - 1220648			US		1980194		0042-0040-US		No			No		No	No	Health Professional			Manufacturer report
707	1220648-2026-02486	24283254	https://www.accessdata.fda.gov/scripts/cdrh/cfdocs/cfmaude/detail.cfm?mdrfoi__id=24283254&pc=OZD	01/30/2026			02/06/2026			01/30/2026	02/06/2026					02/06/2026		TEMPORARY NON-ROLLER TYPE LEFT HEART SUPPORT BLOOD PUMP			IMPELLA 5.5 WITH SMARTASSIST S2 SET, US			OZD						ABIOMED, INC. - 1220648			US		2026804225		1000100		No			No		Yes	No	Health Professional			Manufacturer report
708	1220648-2026-02487	24283260	https://www.accessdata.fda.gov/scripts/cdrh/cfdocs/cfmaude/detail.cfm?mdrfoi__id=24283260&pc=OZD	01/27/2026			02/06/2026			01/27/2026	02/06/2026					02/06/2026		TEMPORARY NON-ROLLER TYPE LEFT HEART SUPPORT BLOOD PUMP			IMPELLA CONTROLLER, PACKAGED, US			OZD						ABIOMED, INC. - 1220648			US		1261102		0042-0000-US		No			No		No	No	Health Professional			Manufacturer report
709	1220648-2026-02492	24283915	https://www.accessdata.fda.gov/scripts/cdrh/cfdocs/cfmaude/detail.cfm?mdrfoi__id=24283915&pc=OZD	01/29/2026	02/06/2026		02/06/2026			01/29/2026	02/06/2026					02/06/2026		TEMPORARY NON-ROLLER TYPE LEFT HEART SUPPORT BLOOD PUMP			IMPELLA 5.5 WITH SMARTASSIST S2 SET, US			OZD			IMPELLA 5.5 WITH SMARTASSIST S2 SET, US			ABIOMED, INC.			US		2026744157		1000100		No			No		Yes	No	Health Professional			Manufacturer report
710	1220648-2026-02495	24285262	https://www.accessdata.fda.gov/scripts/cdrh/cfdocs/cfmaude/detail.cfm?mdrfoi__id=24285262&pc=OZD	01/30/2026	02/06/2026		02/06/2026			01/30/2026	02/06/2026					02/06/2026		TEMPORARY NON-ROLLER TYPE LEFT HEART SUPPORT BLOOD PUMP			IMPELLA 5.5 WITH SMARTASSIST S2 SET, US			OZD			IMPELLA 5.5 WITH SMARTASSIST S2 SET, US			ABIOMED, INC.			US		2026799999		1000100		No			No		Yes	No	Health Professional			Manufacturer report
711	1220648-2026-02496	24285263	https://www.accessdata.fda.gov/scripts/cdrh/cfdocs/cfmaude/detail.cfm?mdrfoi__id=24285263&pc=OZD	01/30/2026	02/06/2026		02/06/2026			01/30/2026	02/06/2026							TEMPORARY NON-ROLLER TYPE LEFT HEART SUPPORT BLOOD PUMP			IMPELLA 5.5 WITH SMARTASSIST S2 SET, US			OZD			IMPELLA 5.5 WITH SMARTASSIST S2 SET, US			ABIOMED, INC.			US		2026805594		1000100		No			No		Yes	No	Health Professional			Manufacturer report
712	1220648-2026-02497	24285272	https://www.accessdata.fda.gov/scripts/cdrh/cfdocs/cfmaude/detail.cfm?mdrfoi__id=24285272&pc=OZD	01/31/2026	02/06/2026		02/06/2026			01/31/2026	02/06/2026					02/06/2026		TEMPORARY NON-ROLLER TYPE LEFT HEART SUPPORT BLOOD PUMP			IMPELLA 5.5 WITH SMARTASSIST S2 SET, US			OZD			IMPELLA 5.5 WITH SMARTASSIST S2 SET, US			ABIOMED, INC.			US		2026797973		1000100		No			No		Yes	No	Health Professional			Manufacturer report
713	1220648-2026-02290	24266940	https://www.accessdata.fda.gov/scripts/cdrh/cfdocs/cfmaude/detail.cfm?mdrfoi__id=24266940&pc=OZD	01/30/2026			02/05/2026			01/31/2026	02/05/2026							TEMPORARY NON-ROLLER TYPE LEFT HEART SUPPORT BLOOD PUMP			IMPELLA 5.5 WITH SMARTASSIST S2 SET, US			OZD						ABIOMED, INC. - 1220648			US		2026703406		000000000001000100		No			No		Yes	No	Health Professional			Manufacturer report
714	1220648-2026-02291	24266953	https://www.accessdata.fda.gov/scripts/cdrh/cfdocs/cfmaude/detail.cfm?mdrfoi__id=24266953&pc=OZD	01/19/2026			02/05/2026			01/21/2026	02/05/2026							TEMPORARY NON-ROLLER TYPE LEFT HEART SUPPORT BLOOD PUMP			IMPELLA 5.5 WITH SMARTASSIST S2 SET, US			OZD						ABIOMED, INC. - 1220648			US		2026707304		1000100		No			No		Yes	No	Health Professional			Manufacturer report
715	1220648-2026-02292	24267009	https://www.accessdata.fda.gov/scripts/cdrh/cfdocs/cfmaude/detail.cfm?mdrfoi__id=24267009&pc=OZD	01/28/2026			02/05/2026			01/28/2026	02/05/2026							TEMPORARY NON-ROLLER TYPE LEFT HEART SUPPORT BLOOD PUMP			IMPELLA 5.5 WITH SMARTASSIST S2 SET, US			OZD						ABIOMED, INC. - 1220648			US		2026798804		1000100		No			No		Yes	No	Health Professional			Manufacturer report
716	1220648-2026-02293	24267164	https://www.accessdata.fda.gov/scripts/cdrh/cfdocs/cfmaude/detail.cfm?mdrfoi__id=24267164&pc=OZD	01/28/2026			02/05/2026			01/28/2026	02/05/2026							TEMPORARY NON-ROLLER TYPE LEFT HEART SUPPORT BLOOD PUMP			IMPELLA 5.5 WITH SMARTASSIST S2 SET, US			OZD						ABIOMED, INC. - 1220648			US		2026677013		1000100		No			No		Yes	No	Health Professional			Manufacturer report
717	1220648-2026-02295	24267242	https://www.accessdata.fda.gov/scripts/cdrh/cfdocs/cfmaude/detail.cfm?mdrfoi__id=24267242&pc=OZD	01/28/2026			02/05/2026			01/28/2026	02/05/2026					02/05/2026		TEMPORARY NON-ROLLER TYPE LEFT HEART SUPPORT BLOOD PUMP			OPTICAL, AIC, IMPELLA CONNECT, PKGD, US			OZD						ABIOMED, INC. - 1220648			US		1547850		0042-0040-US		No			No		No	No	Health Professional			Manufacturer report
718	1220648-2026-02300	24267447	https://www.accessdata.fda.gov/scripts/cdrh/cfdocs/cfmaude/detail.cfm?mdrfoi__id=24267447&pc=OZD	01/26/2026			02/05/2026			01/29/2026	02/05/2026							TEMPORARY NON-ROLLER TYPE LEFT HEART SUPPORT BLOOD PUMP			IMPELLA CONTROLLER, PACKAGED, US			OZD						ABIOMED, INC. - 1220648			US		1147695		0042-0000-US		No			No		No	No	Health Professional			Manufacturer report
719	1220648-2026-02303	24267540	https://www.accessdata.fda.gov/scripts/cdrh/cfdocs/cfmaude/detail.cfm?mdrfoi__id=24267540&pc=OZD	01/14/2026			02/05/2026			01/28/2026	02/05/2026					02/05/2026		TEMPORARY NON-ROLLER TYPE LEFT HEART SUPPORT BLOOD PUMP			IMPELLA 5.5 SMARTASSIST S2 SET, JP			OZD						ABIOMED, INC. - 1220648			US		2026762849		1000459		No			No		Yes	No	Health Professional			Manufacturer report
720	1220648-2026-02305	24267552	https://www.accessdata.fda.gov/scripts/cdrh/cfdocs/cfmaude/detail.cfm?mdrfoi__id=24267552&pc=OZD	01/29/2026			02/05/2026			01/29/2026	02/05/2026					02/05/2026		TEMPORARY NON-ROLLER TYPE LEFT HEART SUPPORT BLOOD PUMP			IMPELLA CP SMART ASSIST SET, EU			OZD						ABIOMED, INC. - 1220648			US		2026705915		0048-0014		Device was returned to manufacturer			No		Yes	No	Health Professional			Manufacturer report
721	1220648-2026-02309	24267602	https://www.accessdata.fda.gov/scripts/cdrh/cfdocs/cfmaude/detail.cfm?mdrfoi__id=24267602&pc=OZD	01/29/2026			02/05/2026			01/29/2026	02/05/2026					02/05/2026		TEMPORARY NON-ROLLER TYPE LEFT HEART SUPPORT BLOOD PUMP			IMPELLA CPSA C9+ SET, OUS			OZD						ABIOMED, INC. - 1220648			US		2027816370		000000000001000851		No			No		Yes	No	Health Professional			Manufacturer report
722	1220648-2026-02316	24267783	https://www.accessdata.fda.gov/scripts/cdrh/cfdocs/cfmaude/detail.cfm?mdrfoi__id=24267783&pc=OZD	01/29/2026			02/05/2026			01/29/2026	02/05/2026					02/05/2026		TEMPORARY NON-ROLLER TYPE LEFT HEART SUPPORT BLOOD PUMP			IMPELLA 5.5 WITH SMARTASSIST S2 SET, EU			OZD						ABIOMED, INC. - 1220648			US		2026726684		000000000001000482		No			No		Yes	No	Health Professional			Manufacturer report
723	1220648-2026-02318	24267836	https://www.accessdata.fda.gov/scripts/cdrh/cfdocs/cfmaude/detail.cfm?mdrfoi__id=24267836&pc=OZD	11/07/2025			02/05/2026			11/10/2025	02/05/2026							TEMPORARY NON-ROLLER TYPE LEFT HEART SUPPORT BLOOD PUMP			IMPELLA 5.5 WITH SMARTASSIST S2 SET, US			OZD			IMPELLA 5.5 WITH SMARTASSIST S2 SET, US			ABIOMED, INC. - 1220648			US		2026739125		1000100		No			No		Yes	No	Health Professional			Manufacturer report
724	1220648-2026-02323	24267896	https://www.accessdata.fda.gov/scripts/cdrh/cfdocs/cfmaude/detail.cfm?mdrfoi__id=24267896&pc=OZD	01/29/2026			02/05/2026			01/29/2026	02/05/2026							TEMPORARY NON-ROLLER TYPE LEFT HEART SUPPORT BLOOD PUMP			OPTICAL, AIC, IMPELLA CONNECT, PKGD, US			OZD						ABIOMED, INC. - 1220648			US		1481065		0042-0040-US		Device was returned to manufacturer			No		No	No	Health Professional			Manufacturer report
725	1220648-2026-02327	24267986	https://www.accessdata.fda.gov/scripts/cdrh/cfdocs/cfmaude/detail.cfm?mdrfoi__id=24267986&pc=OZD	01/27/2026			02/05/2026			01/27/2026	02/05/2026					02/05/2026		TEMPORARY NON-ROLLER TYPE LEFT HEART SUPPORT BLOOD PUMP			IMPELLA CONTROLLER, PACKAGED, US			OZD						ABIOMED, INC. - 1220648			US		1127438		0042-0000-US		No			No		No	No	Health Professional			Manufacturer report
726	1220648-2026-02329	24268030	https://www.accessdata.fda.gov/scripts/cdrh/cfdocs/cfmaude/detail.cfm?mdrfoi__id=24268030&pc=OZD	01/28/2026			02/05/2026			01/29/2026	02/05/2026							TEMPORARY NON-ROLLER TYPE LEFT HEART SUPPORT BLOOD PUMP			IMPELLA 5.5 WITH SMARTASSIST S2 SET, US			OZD						ABIOMED, INC. - 1220648			US		2026794637		1000100		No			No		Yes	No	Health Professional			Manufacturer report
727	1220648-2026-02337	24268307	https://www.accessdata.fda.gov/scripts/cdrh/cfdocs/cfmaude/detail.cfm?mdrfoi__id=24268307&pc=OZD	01/24/2026	02/05/2026		02/05/2026			01/24/2026	02/05/2026					02/05/2026		TEMPORARY NON-ROLLER TYPE LEFT HEART SUPPORT BLOOD PUMP			IMPELLA 5.5 WITH SMARTASSIST S2 SET, US			OZD			IMPELLA 5.5 WITH SMARTASSIST S2 SET, US			ABIOMED, INC.			US		2026775963		1000100		No			No		Yes	No	Health Professional			Manufacturer report
728	1220648-2026-02342	24268499	https://www.accessdata.fda.gov/scripts/cdrh/cfdocs/cfmaude/detail.cfm?mdrfoi__id=24268499&pc=OZD	01/25/2026	02/05/2026		02/05/2026			01/26/2026	02/05/2026					02/05/2026		TEMPORARY NON-ROLLER TYPE LEFT HEART SUPPORT BLOOD PUMP			IMPELLA CP SMART ASSIST SET, EU			OZD			IMPELLA CP SMART ASSIST SET, EU			ABIOMED, INC.			US		2026716760		0048-0014		No			No		Yes	No	Health Professional			Manufacturer report
729	1220648-2026-02346	24269190	https://www.accessdata.fda.gov/scripts/cdrh/cfdocs/cfmaude/detail.cfm?mdrfoi__id=24269190&pc=OZD	01/27/2026			02/05/2026			01/27/2026	02/05/2026							TEMPORARY NON-ROLLER TYPE LEFT HEART SUPPORT BLOOD PUMP			OPTICAL, AIC, IMPELLA CONNECT, PKGD, US			OZD						ABIOMED, INC. - 1220648			US		1991105		0042-0040-US		Device was returned to manufacturer			No		No	No	Health Professional			Manufacturer report
730	1220648-2026-02347	24269336	https://www.accessdata.fda.gov/scripts/cdrh/cfdocs/cfmaude/detail.cfm?mdrfoi__id=24269336&pc=OZD	01/30/2026			02/05/2026			01/30/2026	02/05/2026							TEMPORARY NON-ROLLER TYPE LEFT HEART SUPPORT BLOOD PUMP			IMPELLA 5.5 WITH SMARTASSIST S2 SET, US			OZD						ABIOMED, INC. - 1220648			US		2025479706		1000100		No			No		Yes	No	Health Professional			Manufacturer report
731	1220648-2026-02350	24269452	https://www.accessdata.fda.gov/scripts/cdrh/cfdocs/cfmaude/detail.cfm?mdrfoi__id=24269452&pc=OZD	05/13/2025			02/05/2026			01/27/2026	02/05/2026					02/05/2026		TEMPORARY NON-ROLLER TYPE LEFT HEART SUPPORT BLOOD PUMP			IMPELLA 5.5 WITH SMARTASSIST S2 SET, EU			OZD						ABIOMED, INC. - 1220648			US		2026612639		1000482		No			No		Yes	No	Health Professional			Manufacturer report
732	1220648-2026-02352	24269875	https://www.accessdata.fda.gov/scripts/cdrh/cfdocs/cfmaude/detail.cfm?mdrfoi__id=24269875&pc=OZD	01/29/2026			02/05/2026			01/29/2026	02/05/2026							TEMPORARY NON-ROLLER TYPE LEFT HEART SUPPORT BLOOD PUMP			IMPELLA 5.5 WITH SMARTASSIST S2 SET, US			OZD						ABIOMED, INC. - 1220648			US		2026798077		1000100		No			No		Yes	No	Health Professional			Manufacturer report
733	1220648-2026-02211	24270624	https://www.accessdata.fda.gov/scripts/cdrh/cfdocs/cfmaude/detail.cfm?mdrfoi__id=24270624&pc=OZD	11/19/2025			02/05/2026			11/19/2025	02/05/2026					02/05/2026		TEMPORARY NON-ROLLER TYPE LEFT HEART SUPPORT BLOOD PUMP			IMPELLA CONTROLLER, PACKAGED, US			OZD						ABIOMED, INC. - 1220648			US		1090628		0042-0000-US		No			No		No	No	Health Professional			Manufacturer report
734	1220648-2026-02368	24270802	https://www.accessdata.fda.gov/scripts/cdrh/cfdocs/cfmaude/detail.cfm?mdrfoi__id=24270802&pc=OZD	01/30/2026			02/05/2026			01/30/2026	02/05/2026							TEMPORARY NON-ROLLER TYPE LEFT HEART SUPPORT BLOOD PUMP			IMPELLA 5.5 WITH SMARTASSIST S2 SET, US			OZD			IMPELLA 5.5 WITH SMARTASSIST S2 SET, US			ABIOMED, INC. - 1220648			US		2026756749		1000100		No			No		Yes	No	Health Professional			Manufacturer report
735	1220648-2026-02370	24271259	https://www.accessdata.fda.gov/scripts/cdrh/cfdocs/cfmaude/detail.cfm?mdrfoi__id=24271259&pc=OZD	01/31/2026	02/25/2026		02/05/2026			01/31/2026	02/05/2026					02/05/2026		TEMPORARY NON-ROLLER TYPE LEFT HEART SUPPORT BLOOD PUMP			IMPELLA 5.5 WITH SMARTASSIST S2 SET, US			OZD			IMPELLA 5.5 WITH SMARTASSIST S2 SET, US			ABIOMED, INC. - 1220648			US		2026737066		1000100		No			No		Yes	No	Health Professional			Manufacturer report
736	1220648-2026-02378	24271963	https://www.accessdata.fda.gov/scripts/cdrh/cfdocs/cfmaude/detail.cfm?mdrfoi__id=24271963&pc=OZD	01/28/2026			02/05/2026			01/28/2026	02/05/2026					02/05/2026		TEMPORARY NON-ROLLER TYPE LEFT HEART SUPPORT BLOOD PUMP			IMPELLA 5.5 SMARTASSIST S2 SET, JP			OZD						ABIOMED, INC. - 1220648			US		2025536168		1000459		No			No		Yes	No	Health Professional			Manufacturer report
737	1220648-2026-02374	24271984	https://www.accessdata.fda.gov/scripts/cdrh/cfdocs/cfmaude/detail.cfm?mdrfoi__id=24271984&pc=OZD	01/31/2026			02/05/2026			01/31/2026	02/05/2026					02/05/2026		TEMPORARY NON-ROLLER TYPE LEFT HEART SUPPORT BLOOD PUMP			IMPELLA CONTROLLER, PACKAGED, US			OZD			IMPELLA CONTROLLER, PACKAGED, US			ABIOMED, INC. - 1220648			US		1082388		0042-0000-US		No			No		No	No	Health Professional			Manufacturer report
738	1220648-2026-02376	24272038	https://www.accessdata.fda.gov/scripts/cdrh/cfdocs/cfmaude/detail.cfm?mdrfoi__id=24272038&pc=OZD	01/31/2026			02/05/2026			01/31/2026	02/05/2026							TEMPORARY NON-ROLLER TYPE LEFT HEART SUPPORT BLOOD PUMP			IMPELLA 5.5 WITH SMARTASSIST S2 SET, US			OZD			IMPELLA 5.5 WITH SMARTASSIST S2 SET, US			ABIOMED, INC. - 1220648			US		2026801031		1000100		No			No		Yes	No	Health Professional			Manufacturer report
739	1220648-2026-02381	24272368	https://www.accessdata.fda.gov/scripts/cdrh/cfdocs/cfmaude/detail.cfm?mdrfoi__id=24272368&pc=OZD	02/02/2026			02/05/2026			02/02/2026	02/05/2026					02/05/2026		TEMPORARY NON-ROLLER TYPE LEFT HEART SUPPORT BLOOD PUMP			IMPELLA 5.5 WITH SMARTASSIST S2 SET, US			OZD			IMPELLA 5.5 WITH SMARTASSIST S2 SET, US			ABIOMED, INC. - 1220648			US		2026781192		1000100		No			No		Yes	No	Health Professional			Manufacturer report
740	1220648-2026-02386	24272965	https://www.accessdata.fda.gov/scripts/cdrh/cfdocs/cfmaude/detail.cfm?mdrfoi__id=24272965&pc=OZD	01/25/2026	02/05/2026		02/05/2026			01/26/2026	02/05/2026					02/05/2026		TEMPORARY NON-ROLLER TYPE LEFT HEART SUPPORT BLOOD PUMP			OPTICAL, AIC, IMPELLA CONNECT, PKGD, US			OZD			OPTICAL, AIC, IMPELLA CONNECT, PKGD, US			ABIOMED, INC.			US		1870587		0042-0040-US		No			No		No	No	Health Professional			Manufacturer report
741	1220648-2026-02390	24273184	https://www.accessdata.fda.gov/scripts/cdrh/cfdocs/cfmaude/detail.cfm?mdrfoi__id=24273184&pc=OZD	01/29/2026	02/05/2026		02/05/2026			01/29/2026	02/05/2026					02/05/2026		TEMPORARY NON-ROLLER TYPE LEFT HEART SUPPORT BLOOD PUMP			IMPELLA 5.5 WITH SMARTASSIST S2 SET, US			OZD			IMPELLA 5.5 WITH SMARTASSIST S2 SET, US			ABIOMED, INC. - 1220648			US		2026739585		1000100		No			No		Yes	No	Health Professional			Manufacturer report
742	1220648-2026-02395	24273339	https://www.accessdata.fda.gov/scripts/cdrh/cfdocs/cfmaude/detail.cfm?mdrfoi__id=24273339&pc=OZD	01/28/2026	02/05/2026		02/05/2026			01/28/2026	02/05/2026					02/05/2026		TEMPORARY NON-ROLLER TYPE LEFT HEART SUPPORT BLOOD PUMP			IMPELLA CP SMART ASSIST SET, JP			OZD			IMPELLA CP SMART ASSIST SET, JP			ABIOMED, INC.			US		2025575156		0048-0024-JP		No			No		Yes	No	Health Professional			Manufacturer report
743	1220648-2026-02398	24273418	https://www.accessdata.fda.gov/scripts/cdrh/cfdocs/cfmaude/detail.cfm?mdrfoi__id=24273418&pc=OZD	01/23/2026	02/05/2026		02/05/2026			01/23/2026	02/05/2026							TEMPORARY NON-ROLLER TYPE LEFT HEART SUPPORT BLOOD PUMP			IMPELLA 5.5 WITH SMARTASSIST S2 SET, US			OZD			IMPELLA 5.5 WITH SMARTASSIST S2 SET, US			ABIOMED, INC.			US		2026701740		1000100		No			No		Yes	No	Health Professional			Manufacturer report
744	1220648-2026-02400	24273450	https://www.accessdata.fda.gov/scripts/cdrh/cfdocs/cfmaude/detail.cfm?mdrfoi__id=24273450&pc=OZD	01/24/2026	02/05/2026		02/05/2026			01/24/2026	02/05/2026					02/05/2026		TEMPORARY NON-ROLLER TYPE LEFT HEART SUPPORT BLOOD PUMP			IMPELLA CONTROLLER, PACKAGED, US			OZD			IMPELLA CONTROLLER, PACKAGED, US			ABIOMED, INC.			US		1263045		0042-0000-US		No			No		No	No	Health Professional			Manufacturer report
745	1220648-2026-02403	24273552	https://www.accessdata.fda.gov/scripts/cdrh/cfdocs/cfmaude/detail.cfm?mdrfoi__id=24273552&pc=OZD	01/30/2026			02/05/2026			01/30/2026	02/05/2026							TEMPORARY NON-ROLLER TYPE LEFT HEART SUPPORT BLOOD PUMP			IMPELLA 5.5 WITH SMARTASSIST S2 SET, US			OZD			IMPELLA 5.5 WITH SMARTASSIST S2 SET, US			ABIOMED, INC. - 1220648			US		2026798113		000000000001000100		No			No		Yes	No	Health Professional			Manufacturer report
746	1220648-2026-02406	24273640	https://www.accessdata.fda.gov/scripts/cdrh/cfdocs/cfmaude/detail.cfm?mdrfoi__id=24273640&pc=OZD	02/03/2026			02/05/2026			01/30/2026	02/05/2026							TEMPORARY NON-ROLLER TYPE LEFT HEART SUPPORT BLOOD PUMP			IMPELLA 5.5 WITH SMARTASSIST S2 SET, US			OZD			IMPELLA 5.5 WITH SMARTASSIST S2 SET, US			ABIOMED, INC. - 1220648			US		2026806125		000000000001000100		No			No		Yes	No	Health Professional			Manufacturer report
747	1220648-2026-02407	24273686	https://www.accessdata.fda.gov/scripts/cdrh/cfdocs/cfmaude/detail.cfm?mdrfoi__id=24273686&pc=OZD	01/30/2026			02/05/2026			01/30/2026	02/05/2026					02/05/2026		TEMPORARY NON-ROLLER TYPE LEFT HEART SUPPORT BLOOD PUMP			IMPELLA 5.5 WITH SMARTASSIST S2 SET, US			OZD			IMPELLA 5.5 WITH SMARTASSIST S2 SET, US			ABIOMED, INC. - 1220648			US		2026781062		000000000001000100		No			No		Yes	No	Health Professional			Manufacturer report
748	1220648-2026-02402	24273764	https://www.accessdata.fda.gov/scripts/cdrh/cfdocs/cfmaude/detail.cfm?mdrfoi__id=24273764&pc=OZD	01/28/2026	02/05/2026		02/05/2026			01/28/2026	02/05/2026					02/05/2026		TEMPORARY NON-ROLLER TYPE LEFT HEART SUPPORT BLOOD PUMP			IMPELLA CONTROLLER, PACKAGED, US			OZD			IMPELLA CONTROLLER, PACKAGED, US			ABIOMED, INC.			US		1324936		0042-0000-US		Device was returned to manufacturer			No		No	No	Health Professional			Manufacturer report
749	1220648-2026-02409	24273801	https://www.accessdata.fda.gov/scripts/cdrh/cfdocs/cfmaude/detail.cfm?mdrfoi__id=24273801&pc=OZD	12/15/2025	02/25/2026		02/05/2026			12/15/2025	02/05/2026							TEMPORARY NON-ROLLER TYPE LEFT HEART SUPPORT BLOOD PUMP			IMPELLA 5.5 WITH SMARTASSIST S2 SET, US			OZD			IMPELLA 5.5 WITH SMARTASSIST S2 SET, US			ABIOMED, INC. - 1220648			US		2026775983		1000100		No			No		Yes	No	Health Professional			Manufacturer report
750	1220648-2026-02410	24273879	https://www.accessdata.fda.gov/scripts/cdrh/cfdocs/cfmaude/detail.cfm?mdrfoi__id=24273879&pc=OZD	10/21/2025			02/05/2026			10/21/2025	02/05/2026					02/05/2026		TEMPORARY NON-ROLLER TYPE LEFT HEART SUPPORT BLOOD PUMP			IMPELLA 5.5 WITH SMARTASSIST S2 SET, US			OZD			IMPELLA 5.5 WITH SMARTASSIST S2 SET, US			ABIOMED, INC. - 1220648			US		2026718433		000000000001000100		No			No		Yes	No	Health Professional			Manufacturer report
751	1220648-2026-02414	24274107	https://www.accessdata.fda.gov/scripts/cdrh/cfdocs/cfmaude/detail.cfm?mdrfoi__id=24274107&pc=OZD	01/30/2026			02/05/2026			01/30/2026	02/05/2026							TEMPORARY NON-ROLLER TYPE LEFT HEART SUPPORT BLOOD PUMP			IMPELLA 5.5 WITH SMARTASSIST S2 SET, US			OZD			IMPELLA 5.5 WITH SMARTASSIST S2 SET, US			ABIOMED, INC. - 1220648			US		2026678491		000000000001000100		No			No		Yes	No	Health Professional			Manufacturer report
752	1220648-2026-02200	24256821	https://www.accessdata.fda.gov/scripts/cdrh/cfdocs/cfmaude/detail.cfm?mdrfoi__id=24256821&pc=OZD	01/26/2026			02/04/2026			01/26/2026	02/04/2026							TEMPORARY NON-ROLLER TYPE LEFT HEART SUPPORT BLOOD PUMP			IMPELLA 5.5 WITH SMARTASSIST S2 SET, US			OZD						ABIOMED, INC. - 1220648			US		2026794579		1000100		No			No		Yes	No	Health Professional			Manufacturer report
753	1220648-2026-02203	24256866	https://www.accessdata.fda.gov/scripts/cdrh/cfdocs/cfmaude/detail.cfm?mdrfoi__id=24256866&pc=OZD	01/08/2026			02/04/2026			01/08/2026	02/04/2026							TEMPORARY NON-ROLLER TYPE LEFT HEART SUPPORT BLOOD PUMP			IMPELLA 5.5 WITH SMARTASSIST S2 SET, US			OZD						ABIOMED, INC. - 1220648			US		2026795704		000000000001000100		No			No		Yes	No	Health Professional			Manufacturer report
754	1220648-2026-02207	24257043	https://www.accessdata.fda.gov/scripts/cdrh/cfdocs/cfmaude/detail.cfm?mdrfoi__id=24257043&pc=OZD	01/26/2026			02/04/2026			01/26/2026	02/04/2026					02/04/2026		TEMPORARY NON-ROLLER TYPE LEFT HEART SUPPORT BLOOD PUMP			IMPELLA CP SMART ASSIST SET, EU			OZD						ABIOMED, INC. - 1220648			US		2026719710		0048-0014		Device was returned to manufacturer			No		Yes	No	Health Professional			Manufacturer report
755	1220648-2026-02208	24257066	https://www.accessdata.fda.gov/scripts/cdrh/cfdocs/cfmaude/detail.cfm?mdrfoi__id=24257066&pc=OZD	01/22/2026			02/04/2026			01/22/2026	02/04/2026					02/04/2026		TEMPORARY NON-ROLLER TYPE LEFT HEART SUPPORT BLOOD PUMP			IMPELLA 5.5 WITH SMARTASSIST S2 SET, EU			OZD						ABIOMED, INC. - 1220648			US		2026794397		000000000001000482		No			No		Yes	No	Health Professional			Manufacturer report
756	1220648-2026-02209	24257094	https://www.accessdata.fda.gov/scripts/cdrh/cfdocs/cfmaude/detail.cfm?mdrfoi__id=24257094&pc=OZD	01/27/2026			02/04/2026			01/27/2026	02/04/2026							TEMPORARY NON-ROLLER TYPE LEFT HEART SUPPORT BLOOD PUMP			IMPELLA 5.5 WITH SMARTASSIST S2 SET, US			OZD						ABIOMED, INC. - 1220648			US		2026803192		000000000001000100		No			No		Yes	No	Health Professional			Manufacturer report
757	1220648-2026-02212	24257389	https://www.accessdata.fda.gov/scripts/cdrh/cfdocs/cfmaude/detail.cfm?mdrfoi__id=24257389&pc=OZD	01/21/2026	02/05/2026		02/04/2026			01/21/2026	02/04/2026					02/04/2026		TEMPORARY NON-ROLLER TYPE LEFT HEART SUPPORT BLOOD PUMP			IMPELLA 5.5 WITH SMARTASSIST S2 SET, US			OZD			IMPELLA 5.5 WITH SMARTASSIST S2 SET, US			ABIOMED, INC. - 1220648			US		2026763779		1000100		No			No		Yes	No	Health Professional			Manufacturer report
758	1220648-2026-02215	24257461	https://www.accessdata.fda.gov/scripts/cdrh/cfdocs/cfmaude/detail.cfm?mdrfoi__id=24257461&pc=OZD	01/22/2026			02/04/2026			01/23/2026	02/04/2026					02/04/2026		TEMPORARY NON-ROLLER TYPE LEFT HEART SUPPORT BLOOD PUMP			IMPELLA CP SMART ASSIST SET, CANADA			OZD						ABIOMED, INC. - 1220648			US		2026709200		0048-0044		No			No		Yes	No	Health Professional			Manufacturer report
759	1220648-2026-02218	24257578	https://www.accessdata.fda.gov/scripts/cdrh/cfdocs/cfmaude/detail.cfm?mdrfoi__id=24257578&pc=OZD	01/21/2026	02/16/2026		02/04/2026			01/21/2026	02/04/2026					02/04/2026		TEMPORARY NON-ROLLER TYPE LEFT HEART SUPPORT BLOOD PUMP			IMPELLA 5.5 WITH SMARTASSIST S2 SET, US			OZD			IMPELLA 5.5 WITH SMARTASSIST S2 SET, US			ABIOMED, INC. - 1220648			US		2026796338		1000100		No			No		Yes	No	Health Professional			Manufacturer report
760	1220648-2026-02219	24257601	https://www.accessdata.fda.gov/scripts/cdrh/cfdocs/cfmaude/detail.cfm?mdrfoi__id=24257601&pc=OZD	01/27/2026			02/04/2026			01/27/2026	02/04/2026					02/04/2026		TEMPORARY NON-ROLLER TYPE LEFT HEART SUPPORT BLOOD PUMP			IMPELLA 5.5 WITH SMARTASSIST S2 SET, US			OZD						ABIOMED, INC. - 1220648			US		2026804168		000000000001000100		No			No		Yes	No	Health Professional			Manufacturer report
761	1220648-2026-02229	24257905	https://www.accessdata.fda.gov/scripts/cdrh/cfdocs/cfmaude/detail.cfm?mdrfoi__id=24257905&pc=OZD	01/27/2026			02/04/2026			01/27/2026	02/04/2026							TEMPORARY NON-ROLLER TYPE LEFT HEART SUPPORT BLOOD PUMP			IMPELLA CONTROLLER, PACKAGED, JP			OZD						ABIOMED, INC.			US		1299286		0042-0000-JP		Device was returned to manufacturer			No		No	No	Health Professional			Manufacturer report
762	1220648-2026-02232	24258000	https://www.accessdata.fda.gov/scripts/cdrh/cfdocs/cfmaude/detail.cfm?mdrfoi__id=24258000&pc=OZD	01/27/2026			02/04/2026			01/28/2026	02/04/2026					02/04/2026		TEMPORARY NON-ROLLER TYPE LEFT HEART SUPPORT BLOOD PUMP			IMPELLA 5.5 WITH SMARTASSIST S2 SET, US			OZD						ABIOMED, INC. - 1220648			US		2026802396		000000000001000100		No			No		Yes	No	Health Professional			Manufacturer report
763	1220648-2026-02233	24258038	https://www.accessdata.fda.gov/scripts/cdrh/cfdocs/cfmaude/detail.cfm?mdrfoi__id=24258038&pc=OZD	01/27/2026			02/04/2026			01/28/2026	02/04/2026			05/31/2025		02/04/2026		TEMPORARY NON-ROLLER TYPE LEFT HEART SUPPORT BLOOD PUMP			IMPELLA CP SMART ASSIST SET, JP			OZD						ABIOMED, INC. - 1220648			US		2024350342		0048-0024-JP		No			No		Yes	No	Health Professional			Manufacturer report
764	1220648-2026-02235	24258057	https://www.accessdata.fda.gov/scripts/cdrh/cfdocs/cfmaude/detail.cfm?mdrfoi__id=24258057&pc=OZD	01/27/2026			02/04/2026			01/28/2026	02/04/2026			08/31/2024		02/04/2026		TEMPORARY NON-ROLLER TYPE LEFT HEART SUPPORT BLOOD PUMP			IMPELLA 5.5 SMARTASSIST SET, JP			OZD						ABIOMED, INC. - 1220648			US		2023259572		000000000001000211		No			No		Yes	No	Health Professional			Manufacturer report
765	1220648-2026-02236	24258098	https://www.accessdata.fda.gov/scripts/cdrh/cfdocs/cfmaude/detail.cfm?mdrfoi__id=24258098&pc=OZD	01/27/2026			02/04/2026			01/27/2026	02/04/2026					02/04/2026		TEMPORARY NON-ROLLER TYPE LEFT HEART SUPPORT BLOOD PUMP			IMPELLA CP SMART ASSIST SET, EU			OZD						ABIOMED, INC. - 1220648			US		2026727667		0048-0014		No			No		Yes	No	Health Professional			Manufacturer report
766	1220648-2026-02237	24258108	https://www.accessdata.fda.gov/scripts/cdrh/cfdocs/cfmaude/detail.cfm?mdrfoi__id=24258108&pc=OZD	01/27/2026			02/04/2026			01/27/2026	02/04/2026							TEMPORARY NON-ROLLER TYPE LEFT HEART SUPPORT BLOOD PUMP			IMPELLA 5.5 WITH SMARTASSIST S2 SET, US			OZD						ABIOMED, INC. - 1220648			US		2026621535		1000100		No			No		Yes	No	Health Professional			Manufacturer report
767	1220648-2026-02234	24258111	https://www.accessdata.fda.gov/scripts/cdrh/cfdocs/cfmaude/detail.cfm?mdrfoi__id=24258111&pc=OZD	11/17/2025	02/17/2026		02/04/2026			11/17/2025	02/04/2026					02/04/2026		TEMPORARY NON-ROLLER TYPE LEFT HEART SUPPORT BLOOD PUMP			IMPELLA 5.5 WITH SMARTASSIST S2 SET, US			OZD			IMPELLA 5.5 WITH SMARTASSIST S2 SET, US			ABIOMED, INC. - 1220648			US		2026744131		1000100		No			No		Yes	No	Health Professional			Manufacturer report
768	1220648-2026-02246	24259042	https://www.accessdata.fda.gov/scripts/cdrh/cfdocs/cfmaude/detail.cfm?mdrfoi__id=24259042&pc=OZD	10/21/2025			02/04/2026			10/21/2025	02/04/2026					02/04/2026		TEMPORARY NON-ROLLER TYPE LEFT HEART SUPPORT BLOOD PUMP			IMPELLA CONTROLLER, PACKAGED, US			OZD			IMPELLA CONTROLLER, PACKAGED, US			ABIOMED, INC. - 1220648			US		1390619		0042-0000-US		Device was returned to manufacturer			No		No	No	Health Professional			Manufacturer report
769	1220648-2026-02248	24259327	https://www.accessdata.fda.gov/scripts/cdrh/cfdocs/cfmaude/detail.cfm?mdrfoi__id=24259327&pc=OZD	01/22/2026			02/04/2026			01/22/2026	02/04/2026							TEMPORARY NON-ROLLER TYPE LEFT HEART SUPPORT BLOOD PUMP			IMPELLA 5.5 WITH SMARTASSIST S2 SET, US			OZD						ABIOMED, INC. - 1220648			US		2026742655		1000100		Device was returned to manufacturer			No		Yes	No	Health Professional			Manufacturer report
770	1220648-2026-02250	24259891	https://www.accessdata.fda.gov/scripts/cdrh/cfdocs/cfmaude/detail.cfm?mdrfoi__id=24259891&pc=OZD	01/17/2026			02/04/2026			01/17/2026	02/04/2026					02/04/2026		TEMPORARY NON-ROLLER TYPE LEFT HEART SUPPORT BLOOD PUMP			IMPELLA OPTICAL CONTROLLER, PACKAGED, US			OZD						ABIOMED, INC. - 1220648			US		1446476		0042-0010-US		No			No		No	No	Health Professional			Manufacturer report
771	1220648-2026-02252	24260369	https://www.accessdata.fda.gov/scripts/cdrh/cfdocs/cfmaude/detail.cfm?mdrfoi__id=24260369&pc=OZD	01/29/2026			02/04/2026			01/29/2026	02/04/2026					02/04/2026		TEMPORARY NON-ROLLER TYPE LEFT HEART SUPPORT BLOOD PUMP			OPTICAL AIC W/IMPELLA CONNECT,PACK'D, EU			OZD						ABIOMED, INC. - 1220648			US		1746366		0042-0040-EU		Device was returned to manufacturer			No		No	No	Health Professional			Manufacturer report
772	1220648-2026-02256	24261072	https://www.accessdata.fda.gov/scripts/cdrh/cfdocs/cfmaude/detail.cfm?mdrfoi__id=24261072&pc=OZD	01/22/2026			02/04/2026			01/22/2026	02/04/2026					02/04/2026		TEMPORARY NON-ROLLER TYPE LEFT HEART SUPPORT BLOOD PUMP			IMPELLA 5.5 WITH SMARTASSIST S2 SET, EU			OZD						ABIOMED, INC. - 1220648			US		2026798481		1000482		Device was returned to manufacturer			No		Yes	No	Health Professional			Manufacturer report
773	1220648-2026-02260	24261918	https://www.accessdata.fda.gov/scripts/cdrh/cfdocs/cfmaude/detail.cfm?mdrfoi__id=24261918&pc=OZD	01/29/2026	02/04/2026		02/04/2026			01/29/2026	02/04/2026					02/04/2026		TEMPORARY NON-ROLLER TYPE LEFT HEART SUPPORT BLOOD PUMP			OPTICAL, AIC, IMPELLA CONNECT, PKGD, US			OZD			OPTICAL, AIC, IMPELLA CONNECT, PKGD, US			ABIOMED, INC. - 1220648			US		1729761		0042-0040-US		Device was returned to manufacturer			No		No	No	Health Professional			Manufacturer report
774	1220648-2026-02261	24261938	https://www.accessdata.fda.gov/scripts/cdrh/cfdocs/cfmaude/detail.cfm?mdrfoi__id=24261938&pc=OZD	01/26/2026			02/04/2026			01/27/2026	02/04/2026							TEMPORARY NON-ROLLER TYPE LEFT HEART SUPPORT BLOOD PUMP			IMPELLA 5.5 WITH SMARTASSIST S2 SET, EU			OZD						ABIOMED, INC. - 1220648			US		2026784002		1000482		No			No		Yes	No	Health Professional			Manufacturer report
775	1220648-2026-02265	24262086	https://www.accessdata.fda.gov/scripts/cdrh/cfdocs/cfmaude/detail.cfm?mdrfoi__id=24262086&pc=OZD	01/28/2026	02/04/2026		02/04/2026			01/29/2026	02/04/2026					02/04/2026		TEMPORARY NON-ROLLER TYPE LEFT HEART SUPPORT BLOOD PUMP			IMPELLA CP SMART ASSIST SET, EU			OZD			IMPELLA CP SMART ASSIST SET, EU			ABIOMED, INC. - 1220648			US		2026727408		0048-0014		No			No		Yes	No	Health Professional			Manufacturer report
776	1220648-2026-02278	24264655	https://www.accessdata.fda.gov/scripts/cdrh/cfdocs/cfmaude/detail.cfm?mdrfoi__id=24264655&pc=OZD	01/19/2026	02/04/2026		02/04/2026			01/20/2026	02/04/2026							TEMPORARY NON-ROLLER TYPE LEFT HEART SUPPORT BLOOD PUMP			IMPELLA 5.5 WITH SMARTASSIST S2 SET, US			OZD			IMPELLA 5.5 WITH SMARTASSIST S2 SET, US			ABIOMED, INC.			US		2026773801		1000100		No			No		Yes	No	Health Professional			Manufacturer report
777	1220648-2026-02279	24264669	https://www.accessdata.fda.gov/scripts/cdrh/cfdocs/cfmaude/detail.cfm?mdrfoi__id=24264669&pc=OZD	01/28/2026	02/04/2026		02/04/2026			01/29/2026	02/04/2026					02/04/2026		TEMPORARY NON-ROLLER TYPE LEFT HEART SUPPORT BLOOD PUMP			OPTICAL AIC W/IMPELLA CONNECT,PACK'D, EU			OZD			OPTICAL AIC W/IMPELLA CONNECT,PACK'D, EU			ABIOMED, INC.			US		1745371		0042-0040-EU		No			No		No	No	Health Professional			Manufacturer report
778	1220648-2026-02280	24264718	https://www.accessdata.fda.gov/scripts/cdrh/cfdocs/cfmaude/detail.cfm?mdrfoi__id=24264718&pc=OZD	01/27/2026	02/04/2026		02/04/2026			01/29/2026	02/04/2026					02/04/2026		TEMPORARY NON-ROLLER TYPE LEFT HEART SUPPORT BLOOD PUMP			IMPELLA CP SMART ASSIST SET, JP			OZD			IMPELLA CP SMART ASSIST SET, JP			ABIOMED, INC.			US		2026793957		0048-0024-JP		No			No		Yes	No	Health Professional			Manufacturer report
779	1220648-2026-02282	24264854	https://www.accessdata.fda.gov/scripts/cdrh/cfdocs/cfmaude/detail.cfm?mdrfoi__id=24264854&pc=OZD	01/29/2026	02/04/2026		02/04/2026			01/29/2026	02/04/2026					02/04/2026		TEMPORARY NON-ROLLER TYPE LEFT HEART SUPPORT BLOOD PUMP			OPTICAL, AIC, IMPELLA CONNECT, PKGD, US			OZD			OPTICAL, AIC, IMPELLA CONNECT, PKGD, US			ABIOMED, INC.			US		1630913		0042-0040-US		Device was returned to manufacturer			No		No	No	Health Professional			Manufacturer report
780	1220648-2026-02281	24264864	https://www.accessdata.fda.gov/scripts/cdrh/cfdocs/cfmaude/detail.cfm?mdrfoi__id=24264864&pc=OZD	01/29/2026	02/10/2026		02/04/2026			01/29/2026	02/04/2026							TEMPORARY NON-ROLLER TYPE LEFT HEART SUPPORT BLOOD PUMP			IMPELLA 5.5 WITH SMARTASSIST S2 SET, US			OZD			IMPELLA 5.5 WITH SMARTASSIST S2 SET, US			ABIOMED, INC.			US		2026786861		1000100		No			No		Yes	No	Health Professional			Manufacturer report
781	1220648-2026-02283	24264881	https://www.accessdata.fda.gov/scripts/cdrh/cfdocs/cfmaude/detail.cfm?mdrfoi__id=24264881&pc=OZD	01/29/2026	02/04/2026		02/04/2026			01/29/2026	02/04/2026							TEMPORARY NON-ROLLER TYPE LEFT HEART SUPPORT BLOOD PUMP			IMPELLA 5.5 WITH SMARTASSIST S2 SET, US			OZD			IMPELLA 5.5 WITH SMARTASSIST S2 SET, US			ABIOMED, INC.			US		2026803100		1000100		No			No		Yes	No	Health Professional			Manufacturer report
782	1220648-2026-02284	24264912	https://www.accessdata.fda.gov/scripts/cdrh/cfdocs/cfmaude/detail.cfm?mdrfoi__id=24264912&pc=OZD	01/29/2026	02/04/2026		02/04/2026			01/29/2026	02/04/2026					02/04/2026		TEMPORARY NON-ROLLER TYPE LEFT HEART SUPPORT BLOOD PUMP			IMPELLA CONTROLLER, PACKAGED, US			OZD			IMPELLA CONTROLLER, PACKAGED, US			ABIOMED, INC.			US		1186526		0042-0000-US		Device was returned to manufacturer			No		No	No	Health Professional			Manufacturer report
783	1220648-2026-02285	24264954	https://www.accessdata.fda.gov/scripts/cdrh/cfdocs/cfmaude/detail.cfm?mdrfoi__id=24264954&pc=OZD	01/29/2026	02/04/2026		02/04/2026			01/29/2026	02/04/2026							TEMPORARY NON-ROLLER TYPE LEFT HEART SUPPORT BLOOD PUMP			IMPELLA 5.5 WITH SMARTASSIST S2 SET, US			OZD			IMPELLA 5.5 WITH SMARTASSIST S2 SET, US			ABIOMED, INC.			US		2026801827		1000100		No			No		Yes	No	Health Professional			Manufacturer report
784	1220648-2026-02286	24264966	https://www.accessdata.fda.gov/scripts/cdrh/cfdocs/cfmaude/detail.cfm?mdrfoi__id=24264966&pc=OZD	01/29/2026	02/04/2026		02/04/2026			01/29/2026	02/04/2026							TEMPORARY NON-ROLLER TYPE LEFT HEART SUPPORT BLOOD PUMP			IMPELLA 5.5 WITH SMARTASSIST S2 SET, US			OZD			IMPELLA 5.5 WITH SMARTASSIST S2 SET, US			ABIOMED, INC.			US		2026803412		1000100		No			No		Yes	No	Health Professional			Manufacturer report
785	1220648-2026-02287	24265022	https://www.accessdata.fda.gov/scripts/cdrh/cfdocs/cfmaude/detail.cfm?mdrfoi__id=24265022&pc=OZD	01/28/2026	02/04/2026		02/04/2026			01/29/2026	02/04/2026			03/31/2025				TEMPORARY NON-ROLLER TYPE LEFT HEART SUPPORT BLOOD PUMP			IMPELLA 5.5 WITH SMARTASSIST S2 SET, US			OZD			IMPELLA 5.5 WITH SMARTASSIST S2 SET, US			ABIOMED, INC.			US		2024319973		1000100		No			No		Yes	No	Health Professional			Manufacturer report
786	1220648-2026-02017	24245178	https://www.accessdata.fda.gov/scripts/cdrh/cfdocs/cfmaude/detail.cfm?mdrfoi__id=24245178&pc=OZD	11/20/2025	01/31/2026		02/03/2026			11/20/2025	02/03/2026			12/31/2025		02/03/2026		TEMPORARY NON-ROLLER TYPE LEFT HEART SUPPORT BLOOD PUMP			IMPELLA CONTROLLER, PACKAGED, US			OZD			IMPELLA CONTROLLER, PACKAGED, US			ABIOMED, INC. - 1220648			US		1390619		0042-0000-US		No			No			No	Health Professional			Manufacturer report
787	1220648-2026-02130	24245402	https://www.accessdata.fda.gov/scripts/cdrh/cfdocs/cfmaude/detail.cfm?mdrfoi__id=24245402&pc=OZD	01/22/2026			02/03/2026			01/22/2026	02/03/2026					02/03/2026		TEMPORARY NON-ROLLER TYPE LEFT HEART SUPPORT BLOOD PUMP			IMPELLA CONTROLLER, PACKAGED, EU			OZD						ABIOMED, INC. - 1220648			US		1257681		0042-0000-EU		No			No		No	No	Health Professional			Manufacturer report
788	1220648-2026-02132	24245489	https://www.accessdata.fda.gov/scripts/cdrh/cfdocs/cfmaude/detail.cfm?mdrfoi__id=24245489&pc=OZD	01/24/2026			02/03/2026			01/26/2026	02/03/2026					02/03/2026		TEMPORARY NON-ROLLER TYPE LEFT HEART SUPPORT BLOOD PUMP			IMPELLA 5.5 SMARTASSIST S2 SET, JP			OZD						ABIOMED, INC. - 1220648			US		2026803700		000000000001000459		Device was returned to manufacturer			Yes		Yes	No	Health Professional			Manufacturer report
789	1220648-2026-02134	24245536	https://www.accessdata.fda.gov/scripts/cdrh/cfdocs/cfmaude/detail.cfm?mdrfoi__id=24245536&pc=OZD	01/24/2026			02/03/2026			01/27/2026	02/03/2026					02/03/2026		TEMPORARY NON-ROLLER TYPE LEFT HEART SUPPORT BLOOD PUMP			IMPELLA CONTROLLER, PACKAGED, EU			OZD						ABIOMED, INC. - 1220648			US		1121932		0042-0000-EU		Device was returned to manufacturer			No		No	No	Health Professional			Manufacturer report
790	1220648-2026-02136	24245594	https://www.accessdata.fda.gov/scripts/cdrh/cfdocs/cfmaude/detail.cfm?mdrfoi__id=24245594&pc=OZD	01/15/2026			02/03/2026			01/15/2026	02/03/2026							TEMPORARY NON-ROLLER TYPE LEFT HEART SUPPORT BLOOD PUMP			IMPELLA CONTROLLER, PACKAGED, US			OZD						ABIOMED, INC. - 1220648			US		1338418		0042-0000-US		Device was returned to manufacturer			No		No	No	Health Professional			Manufacturer report
791	1220648-2026-02137	24245650	https://www.accessdata.fda.gov/scripts/cdrh/cfdocs/cfmaude/detail.cfm?mdrfoi__id=24245650&pc=OZD	01/15/2026			02/03/2026			01/15/2026	02/03/2026							TEMPORARY NON-ROLLER TYPE LEFT HEART SUPPORT BLOOD PUMP			IMPELLA 5.5 WITH SMARTASSIST S2 SET, US			OZD						ABIOMED, INC. - 1220648			US		2026671914		000000000001000100		No			No		Yes	No	Health Professional			Manufacturer report
792	1220648-2026-02146	24245884	https://www.accessdata.fda.gov/scripts/cdrh/cfdocs/cfmaude/detail.cfm?mdrfoi__id=24245884&pc=OZD	01/25/2026	02/18/2026		02/03/2026			01/26/2026	02/03/2026					02/03/2026		TEMPORARY NON-ROLLER TYPE LEFT HEART SUPPORT BLOOD PUMP			IMPELLA 5.5 WITH SMARTASSIST S2 SET, US			OZD						ABIOMED, INC. - 1220648			US		2026742004		000000000001000100		No			No		Yes	No	Health Professional			Manufacturer report
793	1220648-2026-02148	24245944	https://www.accessdata.fda.gov/scripts/cdrh/cfdocs/cfmaude/detail.cfm?mdrfoi__id=24245944&pc=OZD	01/26/2026			02/03/2026			01/26/2026	02/03/2026					02/03/2026		TEMPORARY NON-ROLLER TYPE LEFT HEART SUPPORT BLOOD PUMP			IMPELLA 5.5 WITH SMARTASSIST S2 SET, US			OZD						ABIOMED, INC. - 1220648			US		2025601462		000000000001000100		No			No		Yes	No	Health Professional			Manufacturer report
794	1220648-2026-02151	24246042	https://www.accessdata.fda.gov/scripts/cdrh/cfdocs/cfmaude/detail.cfm?mdrfoi__id=24246042&pc=OZD	01/27/2026			02/03/2026			01/27/2026	02/03/2026					02/03/2026		TEMPORARY NON-ROLLER TYPE LEFT HEART SUPPORT BLOOD PUMP			IMPELLA 5.5 WITH SMARTASSIST S2 SET, US			OZD						ABIOMED, INC. - 1220648			US		2026731238		1000100		No			No		Yes	No	Health Professional			Manufacturer report
795	1220648-2026-02158	24246775	https://www.accessdata.fda.gov/scripts/cdrh/cfdocs/cfmaude/detail.cfm?mdrfoi__id=24246775&pc=OZD	01/21/2026	02/03/2026		02/03/2026			01/21/2026	02/03/2026					02/03/2026		TEMPORARY NON-ROLLER TYPE LEFT HEART SUPPORT BLOOD PUMP			IMPELLA 5.5 WITH SMARTASSIST S2 SET, US			OZD			IMPELLA 5.5 WITH SMARTASSIST S2 SET, US			ABIOMED, INC. - 1220648			US		2026734167		1000100		No			No		Yes	No	Health Professional			Manufacturer report
796	1220648-2026-02162	24247370	https://www.accessdata.fda.gov/scripts/cdrh/cfdocs/cfmaude/detail.cfm?mdrfoi__id=24247370&pc=OZD	11/18/2025			02/03/2026			11/18/2025	02/03/2026					02/03/2026		TEMPORARY NON-ROLLER TYPE LEFT HEART SUPPORT BLOOD PUMP			IMPELLA 5.5 WITH SMARTASSIST S2 SET, US			OZD			IMPELLA 5.5 WITH SMARTASSIST S2 SET, US			ABIOMED, INC. - 1220648			US		2026754266		1000100		No			No		Yes	No	Health Professional			Manufacturer report
797	1220648-2026-02170	24248203	https://www.accessdata.fda.gov/scripts/cdrh/cfdocs/cfmaude/detail.cfm?mdrfoi__id=24248203&pc=OZD	01/27/2026			02/03/2026			01/27/2026	02/03/2026							TEMPORARY NON-ROLLER TYPE LEFT HEART SUPPORT BLOOD PUMP			IMPELLA 5.5 WITH SMARTASSIST S2 SET, US			OZD						ABIOMED, INC. - 1220648			US		2026798739		1000100		No			No		Yes	No	Health Professional			Manufacturer report
798	1220648-2026-02171	24248320	https://www.accessdata.fda.gov/scripts/cdrh/cfdocs/cfmaude/detail.cfm?mdrfoi__id=24248320&pc=OZD	02/01/2026			02/03/2026			01/27/2026	02/03/2026					02/03/2026		TEMPORARY NON-ROLLER TYPE LEFT HEART SUPPORT BLOOD PUMP			IMPELLA 5.5 WITH SMARTASSIST S2 SET, US			OZD						ABIOMED, INC. - 1220648			US		2026801818		1000100		No			No		Yes	No	Health Professional			Manufacturer report
799	1220648-2026-02173	24248611	https://www.accessdata.fda.gov/scripts/cdrh/cfdocs/cfmaude/detail.cfm?mdrfoi__id=24248611&pc=PYX	01/27/2026			02/03/2026			01/27/2026	02/03/2026							TEMPORARY NON-ROLLER TYPE RIGHT HEART SUPPORT BLOOD PUMP			IMPELLA PUMP, RP-IJ, STERILE			PYX						ABIOMED, INC. - 1220648			US		1958493		1000186		No			No		Yes	No	Health Professional			Manufacturer report
800	1220648-2026-02178	24250029	https://www.accessdata.fda.gov/scripts/cdrh/cfdocs/cfmaude/detail.cfm?mdrfoi__id=24250029&pc=OZD	01/26/2026			02/03/2026			01/27/2026	02/03/2026					02/03/2026		TEMPORARY NON-ROLLER TYPE LEFT HEART SUPPORT BLOOD PUMP			IMPELLA CPSA C9+ SET, OUS			OZD						ABIOMED, INC. - 1220648			US		2026796396		1000851		No			No		Yes	No	Health Professional			Manufacturer report
801	1220648-2026-02177	24250030	https://www.accessdata.fda.gov/scripts/cdrh/cfdocs/cfmaude/detail.cfm?mdrfoi__id=24250030&pc=OZD	01/27/2026			02/03/2026			01/27/2026	02/03/2026					02/03/2026		TEMPORARY NON-ROLLER TYPE LEFT HEART SUPPORT BLOOD PUMP			OPTICAL, AIC, IMPELLA CONNECT, PKGD, US			OZD						ABIOMED, INC. - 1220648			US		1546473		0042-0040-US		No			No		No	No	Health Professional			Manufacturer report
802	1220648-2026-02181	24250600	https://www.accessdata.fda.gov/scripts/cdrh/cfdocs/cfmaude/detail.cfm?mdrfoi__id=24250600&pc=OZD	01/27/2026			02/03/2026			01/27/2026	02/03/2026			08/31/2025		02/03/2026		TEMPORARY NON-ROLLER TYPE LEFT HEART SUPPORT BLOOD PUMP			IMPELLA 5.5 SMARTASSIST SET, JP			OZD						ABIOMED, INC. - 1220648			US		2024391391		1000211		No			No		Yes	No	Health Professional			Manufacturer report
803	1220648-2026-02193	24255143	https://www.accessdata.fda.gov/scripts/cdrh/cfdocs/cfmaude/detail.cfm?mdrfoi__id=24255143&pc=OZD	01/27/2026	02/03/2026		02/03/2026			01/28/2026	02/03/2026							TEMPORARY NON-ROLLER TYPE LEFT HEART SUPPORT BLOOD PUMP			IMPELLA CONTROLLER, PACKAGED, US			OZD			IMPELLA CONTROLLER, PACKAGED, US			ABIOMED, INC.			US		1213649		0042-0000-US		Device was returned to manufacturer			No		No	No	Health Professional			Manufacturer report
804	1220648-2026-02020	24230758	https://www.accessdata.fda.gov/scripts/cdrh/cfdocs/cfmaude/detail.cfm?mdrfoi__id=24230758&pc=OZD	11/25/2025			02/02/2026			11/25/2025	02/02/2026					02/02/2026		TEMPORARY NON-ROLLER TYPE LEFT HEART SUPPORT BLOOD PUMP			IMPELLA CP			OZD			IMPELLA CP			ABIOMED, INC. - 1220648			US		2026755472		1000080		No			Yes		Yes	No	Health Professional			Manufacturer report
805	1220648-2026-02019	24231022	https://www.accessdata.fda.gov/scripts/cdrh/cfdocs/cfmaude/detail.cfm?mdrfoi__id=24231022&pc=OZD	11/24/2025			02/02/2026			11/24/2025	02/02/2026							TEMPORARY NON-ROLLER TYPE LEFT HEART SUPPORT BLOOD PUMP			IMPELLA CP			OZD						ABIOMED, INC. - 1220648			US		2026739491		0048-0045		No			Yes			No	Health Professional			Manufacturer report
806	1220648-2026-02025	24231112	https://www.accessdata.fda.gov/scripts/cdrh/cfdocs/cfmaude/detail.cfm?mdrfoi__id=24231112&pc=OZD	01/23/2026			02/02/2026			01/23/2026	02/02/2026					02/02/2026		TEMPORARY NON-ROLLER TYPE LEFT HEART SUPPORT BLOOD PUMP			IMPELLA 5.5 WITH SMARTASSIST S2 SET, US			OZD						ABIOMED, INC. - 1220648			US		2026781197		1000100		Device was returned to manufacturer			No		Yes	No	Health Professional			Manufacturer report
807	1220648-2026-02034	24231676	https://www.accessdata.fda.gov/scripts/cdrh/cfdocs/cfmaude/detail.cfm?mdrfoi__id=24231676&pc=OZD	11/10/2025			02/02/2026			11/10/2025	02/02/2026							TEMPORARY NON-ROLLER TYPE LEFT HEART SUPPORT BLOOD PUMP			IMPELLA 5.5 WITH SMARTASSIST S2 SET, US			OZD			IMPELLA 5.5 WITH SMARTASSIST S2 SET, US			ABIOMED, INC. - 1220648			US		2026748976		000000000001000100		No			No		Yes	Y	Health Professional			Manufacturer report
808	1220648-2026-02043	24232673	https://www.accessdata.fda.gov/scripts/cdrh/cfdocs/cfmaude/detail.cfm?mdrfoi__id=24232673&pc=OZD	01/28/2026			02/02/2026			01/28/2026	02/02/2026					02/02/2026		TEMPORARY NON-ROLLER TYPE LEFT HEART SUPPORT BLOOD PUMP			IMPELLA 5.5 WITH SMARTASSIST S2 SET, US			OZD						ABIOMED, INC. - 1220648			US		2026795406		1000100		No			No		Yes	No	Health Professional			Manufacturer report
809	1220648-2026-02053	24232887	https://www.accessdata.fda.gov/scripts/cdrh/cfdocs/cfmaude/detail.cfm?mdrfoi__id=24232887&pc=OZD	01/29/2026			02/02/2026			01/29/2026	02/02/2026							TEMPORARY NON-ROLLER TYPE LEFT HEART SUPPORT BLOOD PUMP			IMPELLA CONTROLLER, PACKAGED, US			OZD						ABIOMED, INC. - 1220648			US		1218791		0042-0000-US		No			No		No	No	Health Professional			Manufacturer report
810	1220648-2026-02047	24232889	https://www.accessdata.fda.gov/scripts/cdrh/cfdocs/cfmaude/detail.cfm?mdrfoi__id=24232889&pc=OZD	01/23/2026			02/02/2026			01/23/2026	02/02/2026					02/02/2026		TEMPORARY NON-ROLLER TYPE LEFT HEART SUPPORT BLOOD PUMP			IMPELLA CPSA C9+ SET, OUS			OZD						ABIOMED, INC. - 1220648			US		2026778550		000000000001000851		No			No		Yes	No	Health Professional			Manufacturer report
811	1220648-2026-02046	24232902	https://www.accessdata.fda.gov/scripts/cdrh/cfdocs/cfmaude/detail.cfm?mdrfoi__id=24232902&pc=OZD	01/28/2026			02/02/2026			01/28/2026	02/02/2026							TEMPORARY NON-ROLLER TYPE LEFT HEART SUPPORT BLOOD PUMP			IMPELLA 5.5 WITH SMARTASSIST S2 SET, US			OZD						ABIOMED, INC. - 1220648			US		2026802378		1000100		No			No		Yes	No	Health Professional			Manufacturer report
812	1220648-2026-02050	24232978	https://www.accessdata.fda.gov/scripts/cdrh/cfdocs/cfmaude/detail.cfm?mdrfoi__id=24232978&pc=OZD	01/28/2026			02/02/2026			01/28/2026	02/02/2026							TEMPORARY NON-ROLLER TYPE LEFT HEART SUPPORT BLOOD PUMP			IMPELLA 5.5 WITH SMARTASSIST S2 SET, US			OZD						ABIOMED, INC. - 1220648			US		2026795458		000000000001000100		No			No		Yes	No	Health Professional			Manufacturer report
813	1220648-2026-02052	24233008	https://www.accessdata.fda.gov/scripts/cdrh/cfdocs/cfmaude/detail.cfm?mdrfoi__id=24233008&pc=OZD	01/16/2026			02/02/2026			01/19/2026	02/02/2026					02/02/2026		TEMPORARY NON-ROLLER TYPE LEFT HEART SUPPORT BLOOD PUMP			IMPELLA 5.5 WITH SMARTASSIST S2 SET, EU			OZD						ABIOMED, INC. - 1220648			US		2026737002		000000000001000482		No			No		Yes	No	Health Professional			Manufacturer report
814	1220648-2026-02057	24233456	https://www.accessdata.fda.gov/scripts/cdrh/cfdocs/cfmaude/detail.cfm?mdrfoi__id=24233456&pc=OZD	01/22/2026			02/02/2026			01/22/2026	02/02/2026							TEMPORARY NON-ROLLER TYPE LEFT HEART SUPPORT BLOOD PUMP			IMPELLA 5.5 WITH SMARTASSIST S2 SET, US			OZD						ABIOMED, INC. - 1220648			US		2026757857		000000000001000100		No			No		Yes	No	Health Professional			Manufacturer report
815	1220648-2026-02056	24233458	https://www.accessdata.fda.gov/scripts/cdrh/cfdocs/cfmaude/detail.cfm?mdrfoi__id=24233458&pc=OZD	01/14/2026			02/02/2026			01/14/2026	02/02/2026					02/02/2026		TEMPORARY NON-ROLLER TYPE LEFT HEART SUPPORT BLOOD PUMP			IMPELLA CONTROLLER, PACKAGED, EU			OZD						ABIOMED, INC. - 1220648			US		1170094		0042-0000-EU		Device was returned to manufacturer			No		No	No	Health Professional			Manufacturer report
816	1220648-2026-02023	24233471	https://www.accessdata.fda.gov/scripts/cdrh/cfdocs/cfmaude/detail.cfm?mdrfoi__id=24233471&pc=OZD	01/23/2026			02/02/2026			01/23/2026	02/02/2026					02/02/2026		TEMPORARY NON-ROLLER TYPE LEFT HEART SUPPORT BLOOD PUMP			IMPELLA CPSA C9+ SET, OUS			OZD						ABIOMED, INC. - 1220648			US		2026757375		1000851		No			No		Yes	No	Health Professional			Manufacturer report
817	1220648-2026-02059	24233538	https://www.accessdata.fda.gov/scripts/cdrh/cfdocs/cfmaude/detail.cfm?mdrfoi__id=24233538&pc=OZD	12/22/2025			02/02/2026			01/23/2026	02/02/2026							TEMPORARY NON-ROLLER TYPE LEFT HEART SUPPORT BLOOD PUMP			IMPELLA 5.5 WITH SMARTASSIST S2 SET, EU			OZD						ABIOMED, INC. - 1220648			US		2026665307		000000000001000482		No			No		Yes	No	Health Professional			Manufacturer report
818	1220648-2026-02074	24233578	https://www.accessdata.fda.gov/scripts/cdrh/cfdocs/cfmaude/detail.cfm?mdrfoi__id=24233578&pc=OZD	01/21/2026			02/02/2026			01/21/2026	02/02/2026					02/02/2026		TEMPORARY NON-ROLLER TYPE LEFT HEART SUPPORT BLOOD PUMP			IMPELLA 5.5 WITH SMARTASSIST S2 SET, US			OZD						ABIOMED, INC. - 1220648			US		2026798001		1000100		No			No		Yes	No	Health Professional			Manufacturer report
819	1220648-2026-02060	24233674	https://www.accessdata.fda.gov/scripts/cdrh/cfdocs/cfmaude/detail.cfm?mdrfoi__id=24233674&pc=OZD	01/24/2026	02/16/2026		02/02/2026			01/24/2026	02/02/2026							TEMPORARY NON-ROLLER TYPE LEFT HEART SUPPORT BLOOD PUMP			OPTICAL, AIC, IMPELLA CONNECT, PKGD, US			OZD						ABIOMED, INC. - 1220648			US		1556637		0042-0040-US		Device was returned to manufacturer			No		No	No	Health Professional			Manufacturer report
820	1220648-2026-02066	24233721	https://www.accessdata.fda.gov/scripts/cdrh/cfdocs/cfmaude/detail.cfm?mdrfoi__id=24233721&pc=OZD	01/24/2026			02/02/2026			01/24/2026	02/02/2026							TEMPORARY NON-ROLLER TYPE LEFT HEART SUPPORT BLOOD PUMP			OPTICAL, AIC, IMPELLA CONNECT, PKGD, US			OZD						ABIOMED, INC. - 1220648			US		1849082		0042-0040-US		No			No		No	No	Health Professional			Manufacturer report
821	1220648-2026-02069	24233810	https://www.accessdata.fda.gov/scripts/cdrh/cfdocs/cfmaude/detail.cfm?mdrfoi__id=24233810&pc=OZD	01/28/2026			02/02/2026			01/28/2026	02/02/2026					02/02/2026		TEMPORARY NON-ROLLER TYPE LEFT HEART SUPPORT BLOOD PUMP			IMPELLA 5.5 WITH SMARTASSIST S2 SET, US			OZD						ABIOMED, INC. - 1220648			US		2026794792		1000100		No			No		Yes	No	Health Professional			Manufacturer report
822	1220648-2026-02071	24233820	https://www.accessdata.fda.gov/scripts/cdrh/cfdocs/cfmaude/detail.cfm?mdrfoi__id=24233820&pc=OZD	01/24/2026			02/02/2026			01/25/2026	02/02/2026							TEMPORARY NON-ROLLER TYPE LEFT HEART SUPPORT BLOOD PUMP			IMPELLA 5.5 WITH SMARTASSIST S2 SET, US			OZD						ABIOMED, INC. - 1220648			US		2026804168		1000100		No			No		Yes	No	Health Professional			Manufacturer report
823	1220648-2026-02082	24234115	https://www.accessdata.fda.gov/scripts/cdrh/cfdocs/cfmaude/detail.cfm?mdrfoi__id=24234115&pc=OZD	10/08/2025			02/02/2026			10/08/2025	02/02/2026					02/02/2026		TEMPORARY NON-ROLLER TYPE LEFT HEART SUPPORT BLOOD PUMP			IMPELLA CONTROLLER, PACKAGED, US			OZD			IMPELLA CONTROLLER, PACKAGED, US			ABIOMED, INC. - 1220648			US		1324018		0042-0000-US		Device was returned to manufacturer			No		No	No	Health Professional			Manufacturer report
824	1220648-2026-02024	24234241	https://www.accessdata.fda.gov/scripts/cdrh/cfdocs/cfmaude/detail.cfm?mdrfoi__id=24234241&pc=OZD	01/23/2026			02/02/2026			01/23/2026	02/02/2026							TEMPORARY NON-ROLLER TYPE LEFT HEART SUPPORT BLOOD PUMP			OPTICAL AIC W/IMPELLA CONNECT,PACK'D, EU			OZD						ABIOMED, INC. - 1220648			US		1786113		0042-0040-EU		No			No		No	No	Health Professional			Manufacturer report
825	1220648-2026-02076	24234314	https://www.accessdata.fda.gov/scripts/cdrh/cfdocs/cfmaude/detail.cfm?mdrfoi__id=24234314&pc=OZD	10/25/2025	02/20/2026		02/02/2026			10/25/2025	02/02/2026							TEMPORARY NON-ROLLER TYPE LEFT HEART SUPPORT BLOOD PUMP			IMPELLA 5.5 WITH SMARTASSIST S2 SET, US			OZD			IMPELLA 5.5 WITH SMARTASSIST S2 SET, US			ABIOMED, INC. - 1220648			US		2026740924		1000100		No			No		Yes	No	Health Professional			Manufacturer report
826	1220648-2026-02077	24234318	https://www.accessdata.fda.gov/scripts/cdrh/cfdocs/cfmaude/detail.cfm?mdrfoi__id=24234318&pc=OZD	01/29/2026			02/02/2026			01/29/2026	02/02/2026							TEMPORARY NON-ROLLER TYPE LEFT HEART SUPPORT BLOOD PUMP			IMPELLA 5.5 WITH SMARTASSIST S2 SET, US			OZD						ABIOMED, INC. - 1220648			US		2026803120		1000100		No			No		Yes	No	Health Professional			Manufacturer report
827	1220648-2026-02096	24235390	https://www.accessdata.fda.gov/scripts/cdrh/cfdocs/cfmaude/detail.cfm?mdrfoi__id=24235390&pc=OZD	01/23/2026	02/02/2026		02/02/2026			01/25/2026	02/02/2026					02/02/2026		TEMPORARY NON-ROLLER TYPE LEFT HEART SUPPORT BLOOD PUMP			OPTICAL AIC W/IMPELLA CONNECT, PKGD, JP			OZD			OPTICAL AIC W/IMPELLA CONNECT, PKGD, JP			ABIOMED, INC.			US		1566737		0042-0040-JP		Device was returned to manufacturer			No		No	No	Health Professional			Manufacturer report
828	1220648-2026-02106	24236008	https://www.accessdata.fda.gov/scripts/cdrh/cfdocs/cfmaude/detail.cfm?mdrfoi__id=24236008&pc=OZD	01/21/2026	02/02/2026		02/02/2026			01/21/2026	02/02/2026							TEMPORARY NON-ROLLER TYPE LEFT HEART SUPPORT BLOOD PUMP			IMPELLA CONTROLLER, PACKAGED, US			OZD			IMPELLA CONTROLLER, PACKAGED, US			ABIOMED, INC. - 1220648			US		1400770		0042-0000-US		No			No		No	No	Health Professional			Manufacturer report
829	1220648-2026-02111	24236181	https://www.accessdata.fda.gov/scripts/cdrh/cfdocs/cfmaude/detail.cfm?mdrfoi__id=24236181&pc=OZD	01/26/2026	02/02/2026		02/02/2026			01/26/2026	02/02/2026							TEMPORARY NON-ROLLER TYPE LEFT HEART SUPPORT BLOOD PUMP			IMPELLA CONTROLLER, PACKAGED, US			OZD			IMPELLA CONTROLLER, PACKAGED, US			ABIOMED, INC.			US		1349165		0042-0000-US		Device was returned to manufacturer			No		No	No	Health Professional			Manufacturer report
830	1220648-2026-02114	24236943	https://www.accessdata.fda.gov/scripts/cdrh/cfdocs/cfmaude/detail.cfm?mdrfoi__id=24236943&pc=OZD	12/15/2025			02/02/2026			12/15/2025	02/02/2026					02/02/2026		TEMPORARY NON-ROLLER TYPE LEFT HEART SUPPORT BLOOD PUMP			IMPELLA 5.5 WITH SMARTASSIST S2 SET, US			OZD			IMPELLA 5.5 WITH SMARTASSIST S2 SET, US			ABIOMED, INC. - 1220648			US		2026780139		1000100		Device was returned to manufacturer			Yes		Yes	No	Health Professional			Manufacturer report
831	1220648-2026-02115	24239844	https://www.accessdata.fda.gov/scripts/cdrh/cfdocs/cfmaude/detail.cfm?mdrfoi__id=24239844&pc=OZD	01/27/2026			02/02/2026			01/27/2026	02/02/2026							TEMPORARY NON-ROLLER TYPE LEFT HEART SUPPORT BLOOD PUMP			IMPELLA 5.5 WITH SMARTASSIST S2 SET, US			OZD						ABIOMED, INC. - 1220648			US		2026798797		1000100		No			No		Yes	No	Health Professional			Manufacturer report
832	1220648-2026-02117	24240456	https://www.accessdata.fda.gov/scripts/cdrh/cfdocs/cfmaude/detail.cfm?mdrfoi__id=24240456&pc=OZD	12/15/2025	02/17/2026		02/02/2026			12/15/2025	02/02/2026					02/02/2026		TEMPORARY NON-ROLLER TYPE LEFT HEART SUPPORT BLOOD PUMP			IMPELLA 5.5 WITH SMARTASSIST S2 SET, US			OZD			IMPELLA 5.5 WITH SMARTASSIST S2 SET, US			ABIOMED, INC. - 1220648			US		2026782080		000000000001000100		No			No		Yes	No	Health Professional			Manufacturer report
833	1220648-2026-02119	24240746	https://www.accessdata.fda.gov/scripts/cdrh/cfdocs/cfmaude/detail.cfm?mdrfoi__id=24240746&pc=OZD	12/15/2025			02/02/2026			12/15/2025	02/02/2026					02/02/2026		TEMPORARY NON-ROLLER TYPE LEFT HEART SUPPORT BLOOD PUMP			IMPELLA 5.5 WITH SMARTASSIST S2 SET, US			OZD			IMPELLA 5.5 WITH SMARTASSIST S2 SET, US			ABIOMED, INC. - 1220648			US		2026765166		000000000001000100		No			No		Yes	No	Health Professional			Manufacturer report
834	1220648-2026-02120	24240898	https://www.accessdata.fda.gov/scripts/cdrh/cfdocs/cfmaude/detail.cfm?mdrfoi__id=24240898&pc=OZD	12/16/2025			02/02/2026			12/16/2025	02/02/2026					02/02/2026		TEMPORARY NON-ROLLER TYPE LEFT HEART SUPPORT BLOOD PUMP			IMPELLA 5.5 WITH SMARTASSIST S2 SET, US			OZD			IMPELLA 5.5 WITH SMARTASSIST S2 SET, US			ABIOMED, INC. - 1220648			US		2026773823		000000000001000100		No			No		Yes	No	Health Professional			Manufacturer report
835	1220648-2026-01924	24220160	https://www.accessdata.fda.gov/scripts/cdrh/cfdocs/cfmaude/detail.cfm?mdrfoi__id=24220160&pc=OZD	01/21/2026			01/30/2026			01/22/2026	01/30/2026							TEMPORARY NON-ROLLER TYPE LEFT HEART SUPPORT BLOOD PUMP			IMPELLA 5.5 WITH SMARTASSIST S2 SET, US			OZD						ABIOMED, INC. - 1220648			US		2026794648		1000100		No			No		Yes	No	Health Professional			Manufacturer report
836	1220648-2026-01926	24220435	https://www.accessdata.fda.gov/scripts/cdrh/cfdocs/cfmaude/detail.cfm?mdrfoi__id=24220435&pc=OZD	01/22/2026			01/30/2026			01/22/2026	01/30/2026							TEMPORARY NON-ROLLER TYPE LEFT HEART SUPPORT BLOOD PUMP			IMPELLA CONTROLLER, PACKAGED, US			OZD						ABIOMED, INC. - 1220648			US		1366755		0042-0000-US		Device was returned to manufacturer			Yes		No	No	Health Professional			Manufacturer report
837	1220648-2026-01927	24220475	https://www.accessdata.fda.gov/scripts/cdrh/cfdocs/cfmaude/detail.cfm?mdrfoi__id=24220475&pc=OZD	01/20/2026			01/30/2026			01/20/2026	01/30/2026					01/30/2026		TEMPORARY NON-ROLLER TYPE LEFT HEART SUPPORT BLOOD PUMP			IMPELLA CONTROLLER, PACKAGED, US			OZD						ABIOMED, INC. - 1220648			US		1075486		0042-0000-US		No			No		No	No	Health Professional			Manufacturer report
838	1220648-2026-01928	24220509	https://www.accessdata.fda.gov/scripts/cdrh/cfdocs/cfmaude/detail.cfm?mdrfoi__id=24220509&pc=OZD	01/23/2026			01/30/2026			01/23/2026	01/30/2026					01/30/2026		TEMPORARY NON-ROLLER TYPE LEFT HEART SUPPORT BLOOD PUMP			OPTICAL, AIC, IMPELLA CONNECT, PKGD, US			OZD						ABIOMED, INC. - 1220648			US		1849082		0042-0040-US		No			No		No	No	Health Professional			Manufacturer report
839	1220648-2026-01932	24220651	https://www.accessdata.fda.gov/scripts/cdrh/cfdocs/cfmaude/detail.cfm?mdrfoi__id=24220651&pc=OZD	02/16/2026			01/30/2026			01/23/2026	01/30/2026					01/30/2026		TEMPORARY NON-ROLLER TYPE LEFT HEART SUPPORT BLOOD PUMP			IMPELLA 5.5 WITH SMARTASSIST S2 SET, US			OZD						ABIOMED, INC. - 1220648			US		2026801547		000000000001000100		No			No		Yes	No	Health Professional			Manufacturer report
840	1220648-2026-01933	24221117	https://www.accessdata.fda.gov/scripts/cdrh/cfdocs/cfmaude/detail.cfm?mdrfoi__id=24221117&pc=OZD	01/21/2025			01/30/2026			01/21/2026	01/30/2026							TEMPORARY NON-ROLLER TYPE LEFT HEART SUPPORT BLOOD PUMP			IMPELLA 5.5 WITH SMARTASSIST S2 SET, US			OZD						ABIOMED, INC. - 1220648			US		2025592823		000000000001000100		No			No		Yes	No	Health Professional			Manufacturer report
841	1220648-2026-01935	24221184	https://www.accessdata.fda.gov/scripts/cdrh/cfdocs/cfmaude/detail.cfm?mdrfoi__id=24221184&pc=OZD	01/18/2026			01/30/2026			01/18/2026	01/30/2026					01/30/2026		TEMPORARY NON-ROLLER TYPE LEFT HEART SUPPORT BLOOD PUMP			IMPELLA 5.5 WITH SMARTASSIST S2 SET, US			OZD						ABIOMED, INC. - 1220648			US		2026769354		1000100		No			No		Yes	No	Health Professional			Manufacturer report
842	1220648-2026-01937	24221239	https://www.accessdata.fda.gov/scripts/cdrh/cfdocs/cfmaude/detail.cfm?mdrfoi__id=24221239&pc=OZD	01/23/2026			01/30/2026			01/23/2026	01/30/2026							TEMPORARY NON-ROLLER TYPE LEFT HEART SUPPORT BLOOD PUMP			IMPELLA 5.5 WITH SMARTASSIST S2 SET, US			OZD						ABIOMED, INC. - 1220648			US		2026766844		000000000001000100		No			No		Yes	No	Health Professional			Manufacturer report
843	1220648-2026-01942	24221380	https://www.accessdata.fda.gov/scripts/cdrh/cfdocs/cfmaude/detail.cfm?mdrfoi__id=24221380&pc=OZD	01/22/2026			01/30/2026			01/23/2026	01/30/2026							TEMPORARY NON-ROLLER TYPE LEFT HEART SUPPORT BLOOD PUMP			IMPELLA 5.5 WITH SMARTASSIST S2 SET, US			OZD						ABIOMED, INC. - 1220648			US		2026795714		000000000001000100		No			No		Yes	No	Health Professional			Manufacturer report
844	1220648-2026-01943	24221417	https://www.accessdata.fda.gov/scripts/cdrh/cfdocs/cfmaude/detail.cfm?mdrfoi__id=24221417&pc=OZD	01/23/2026			01/30/2026			01/23/2026	01/30/2026					01/30/2026		TEMPORARY NON-ROLLER TYPE LEFT HEART SUPPORT BLOOD PUMP			IMPELLA 5.5 WITH SMARTASSIST S2 SET, US			OZD						ABIOMED, INC. - 1220648			US		2026801028		000000000001000100		No			No		Yes	No	Health Professional			Manufacturer report
845	1220648-2026-01945	24221432	https://www.accessdata.fda.gov/scripts/cdrh/cfdocs/cfmaude/detail.cfm?mdrfoi__id=24221432&pc=OZD	01/21/2026			01/30/2026			01/21/2026	01/30/2026					01/30/2026		TEMPORARY NON-ROLLER TYPE LEFT HEART SUPPORT BLOOD PUMP			IMPELLA CONTROLLER, PACKAGED, US			OZD						ABIOMED, INC. - 1220648			US		1112883		0042-0000-US		No			No		No	No	Health Professional			Manufacturer report
846	1220648-2026-01947	24221498	https://www.accessdata.fda.gov/scripts/cdrh/cfdocs/cfmaude/detail.cfm?mdrfoi__id=24221498&pc=OZD	01/23/2026			01/30/2026			01/23/2026	01/30/2026							TEMPORARY NON-ROLLER TYPE LEFT HEART SUPPORT BLOOD PUMP			IMPELLA 5.5 WITH SMARTASSIST S2 SET, US			OZD						ABIOMED, INC. - 1220648			US		2026729870		000000000001000100		No			No		Yes	No	Health Professional			Manufacturer report
847	1220648-2026-01951	24221905	https://www.accessdata.fda.gov/scripts/cdrh/cfdocs/cfmaude/detail.cfm?mdrfoi__id=24221905&pc=OZD	01/26/2026			01/30/2026			01/26/2026	01/30/2026					01/30/2026		TEMPORARY NON-ROLLER TYPE LEFT HEART SUPPORT BLOOD PUMP			IMPELLA CONTROLLER, PACKAGED, US			OZD						ABIOMED, INC. - 1220648			US		1204376		0042-0000-US		No			No		No	No	Health Professional			Manufacturer report
848	1220648-2026-01952	24221917	https://www.accessdata.fda.gov/scripts/cdrh/cfdocs/cfmaude/detail.cfm?mdrfoi__id=24221917&pc=OZD	01/14/2026	02/02/2026		01/30/2026			01/14/2026	01/30/2026							TEMPORARY NON-ROLLER TYPE LEFT HEART SUPPORT BLOOD PUMP			IMPELLA 5.5 WITH SMARTASSIST S2 SET, US			OZD						ABIOMED, INC. - 1220648			US		2026786804		000000000001000100		No			No		Yes	No	Health Professional			Manufacturer report
849	1220648-2026-01953	24221947	https://www.accessdata.fda.gov/scripts/cdrh/cfdocs/cfmaude/detail.cfm?mdrfoi__id=24221947&pc=OZD	01/15/2026			01/30/2026			01/15/2026	01/30/2026					01/30/2026		TEMPORARY NON-ROLLER TYPE LEFT HEART SUPPORT BLOOD PUMP			IMPELLA CPSA C9+ SET, OUS			OZD						ABIOMED, INC. - 1220648			US		2026752000		000000000001000851		No			No		Yes	No	Health Professional			Manufacturer report
850	1220648-2026-01959	24222668	https://www.accessdata.fda.gov/scripts/cdrh/cfdocs/cfmaude/detail.cfm?mdrfoi__id=24222668&pc=OZD	01/26/2026			01/30/2026			01/26/2026	01/30/2026							TEMPORARY NON-ROLLER TYPE LEFT HEART SUPPORT BLOOD PUMP			IMPELLA 5.5 WITH SMARTASSIST S2 SET, US			OZD						ABIOMED, INC. - 1220648			US		2026798648		1000100		No			No		Yes	No	Health Professional			Manufacturer report
851	1220648-2026-01962	24223060	https://www.accessdata.fda.gov/scripts/cdrh/cfdocs/cfmaude/detail.cfm?mdrfoi__id=24223060&pc=OZD	01/26/2026			01/30/2026			01/26/2026	01/30/2026							TEMPORARY NON-ROLLER TYPE LEFT HEART SUPPORT BLOOD PUMP			IMPELLA 5.5 WITH SMARTASSIST S2 SET, US			OZD						ABIOMED, INC. - 1220648			US		2026632487		1000100		No			No		Yes	No	Health Professional			Manufacturer report
852	1220648-2026-01963	24223141	https://www.accessdata.fda.gov/scripts/cdrh/cfdocs/cfmaude/detail.cfm?mdrfoi__id=24223141&pc=OZD	01/24/2026			01/30/2026			01/24/2026	01/30/2026					01/30/2026		TEMPORARY NON-ROLLER TYPE LEFT HEART SUPPORT BLOOD PUMP			IMPELLA 5.5 WITH SMARTASSIST S2 SET, US			OZD						ABIOMED, INC. - 1220648			US		2026767037		1000100		No			No		Yes	No	Health Professional			Manufacturer report
853	1220648-2026-01964	24223150	https://www.accessdata.fda.gov/scripts/cdrh/cfdocs/cfmaude/detail.cfm?mdrfoi__id=24223150&pc=OZD	01/26/2026	02/02/2026		01/30/2026			01/26/2026	01/30/2026					01/30/2026		TEMPORARY NON-ROLLER TYPE LEFT HEART SUPPORT BLOOD PUMP			IMPELLA CONTROLLER, PACKAGED, US			OZD						ABIOMED, INC. - 1220648			US		1109482		0042-0000-US		No			No		No	No	Health Professional			Manufacturer report
854	1220648-2026-01975	24223965	https://www.accessdata.fda.gov/scripts/cdrh/cfdocs/cfmaude/detail.cfm?mdrfoi__id=24223965&pc=OZD	01/26/2026			01/30/2026			01/26/2026	01/30/2026							TEMPORARY NON-ROLLER TYPE LEFT HEART SUPPORT BLOOD PUMP			IMPELLA 5.5 WITH SMARTASSIST SET, CA			OZD						ABIOMED, INC. - 1220648			US		2026613377		0550-0004		Device was returned to manufacturer			No		Yes	No	Health Professional			Manufacturer report
855	1220648-2026-01979	24224111	https://www.accessdata.fda.gov/scripts/cdrh/cfdocs/cfmaude/detail.cfm?mdrfoi__id=24224111&pc=OZD	01/19/2026	01/30/2026		01/30/2026			01/19/2026	01/30/2026							TEMPORARY NON-ROLLER TYPE LEFT HEART SUPPORT BLOOD PUMP			IMPELLA 5.5 WITH SMARTASSIST S2 SET, US			OZD			IMPELLA 5.5 WITH SMARTASSIST S2 SET, US			ABIOMED, INC. - 1220648			US		2026798000		1000100		No			No		Yes	No	Health Professional			Manufacturer report
856	1220648-2026-01981	24224428	https://www.accessdata.fda.gov/scripts/cdrh/cfdocs/cfmaude/detail.cfm?mdrfoi__id=24224428&pc=OZD	01/20/2026	01/30/2026		01/30/2026			01/20/2026	01/30/2026							TEMPORARY NON-ROLLER TYPE LEFT HEART SUPPORT BLOOD PUMP			IMPELLA 5.5 WITH SMARTASSIST S2 SET, US			OZD			IMPELLA 5.5 WITH SMARTASSIST S2 SET, US			ABIOMED, INC. - 1220648			US		2025482065		1000100		No			No		Yes	No	Health Professional			Manufacturer report
857	1220648-2026-01987	24225345	https://www.accessdata.fda.gov/scripts/cdrh/cfdocs/cfmaude/detail.cfm?mdrfoi__id=24225345&pc=OZD	01/26/2026			01/30/2026			01/26/2026	01/30/2026							TEMPORARY NON-ROLLER TYPE LEFT HEART SUPPORT BLOOD PUMP			IMPELLA 5.5 WITH SMARTASSIST S2 SET, US			OZD						ABIOMED, INC. - 1220648			US		2026774717		1000100		No			No		Yes	No	Health Professional			Manufacturer report
858	1220648-2026-01986	24225353	https://www.accessdata.fda.gov/scripts/cdrh/cfdocs/cfmaude/detail.cfm?mdrfoi__id=24225353&pc=OZD	11/12/2025			01/30/2026			11/12/2025	01/30/2026					01/30/2026		TEMPORARY NON-ROLLER TYPE LEFT HEART SUPPORT BLOOD PUMP			IMPELLA 5.5 WITH SMARTASSIST S2 SET, US			OZD			IMPELLA 5.5 WITH SMARTASSIST S2 SET, US			ABIOMED, INC. - 1220648			US		2026740909		1000100		No			No		Yes	No	Health Professional			Manufacturer report
859	1220648-2026-01990	24225515	https://www.accessdata.fda.gov/scripts/cdrh/cfdocs/cfmaude/detail.cfm?mdrfoi__id=24225515&pc=OZD	01/23/2026			01/30/2026			01/23/2026	01/30/2026							TEMPORARY NON-ROLLER TYPE LEFT HEART SUPPORT BLOOD PUMP			IMPELLA CONTROLLER, PACKAGED, US			OZD						ABIOMED, INC. - 1220648			US		1338086		0042-0000-US		No			No		No	No	Health Professional			Manufacturer report
860	1220648-2026-01991	24225915	https://www.accessdata.fda.gov/scripts/cdrh/cfdocs/cfmaude/detail.cfm?mdrfoi__id=24225915&pc=OZD	01/23/2026	02/26/2026		01/30/2026			01/24/2026	01/30/2026							TEMPORARY NON-ROLLER TYPE LEFT HEART SUPPORT BLOOD PUMP			IMPELLA CPSA C9+ SET, OUS			OZD						ABIOMED, INC. - 1220648			US		2026775144		1000851		Device was returned to manufacturer			No		Yes	No	Health Professional			Manufacturer report
861	1220648-2026-01993	24226024	https://www.accessdata.fda.gov/scripts/cdrh/cfdocs/cfmaude/detail.cfm?mdrfoi__id=24226024&pc=OZD	11/13/2025			01/30/2026			11/15/2025	01/30/2026					01/30/2026		TEMPORARY NON-ROLLER TYPE LEFT HEART SUPPORT BLOOD PUMP			IMPELLA OPTICAL CONTROLLER, PACKAGED, US			OZD			IMPELLA OPTICAL CONTROLLER, PACKAGED, US			ABIOMED, INC. - 1220648			US		1471015		0042-0010-US		Device was returned to manufacturer			Yes		No	No	Health Professional			Manufacturer report
862	1220648-2026-01994	24226030	https://www.accessdata.fda.gov/scripts/cdrh/cfdocs/cfmaude/detail.cfm?mdrfoi__id=24226030&pc=OZD	11/13/2025			01/30/2026			11/15/2025	01/30/2026							TEMPORARY NON-ROLLER TYPE LEFT HEART SUPPORT BLOOD PUMP			IMPELLA 5.5 WITH SMARTASSIST S2 SET, US			OZD			IMPELLA 5.5 WITH SMARTASSIST S2 SET, US			ABIOMED, INC. - 1220648			US		2026748286		1000100		No			No		Yes	No	Health Professional			Manufacturer report
863	1220648-2026-01997	24226140	https://www.accessdata.fda.gov/scripts/cdrh/cfdocs/cfmaude/detail.cfm?mdrfoi__id=24226140&pc=OZD	01/15/2026	01/30/2026		01/30/2026			01/16/2026	01/30/2026					01/30/2026		TEMPORARY NON-ROLLER TYPE LEFT HEART SUPPORT BLOOD PUMP			IMPELLA 5.5 WITH SMARTASSIST S2 SET, US			OZD			IMPELLA 5.5 WITH SMARTASSIST S2 SET, US			ABIOMED, INC.			US		2026795737		1000100		No			No		Yes	No	Health Professional			Manufacturer report
864	1220648-2026-01999	24226218	https://www.accessdata.fda.gov/scripts/cdrh/cfdocs/cfmaude/detail.cfm?mdrfoi__id=24226218&pc=OZD	01/22/2026	01/30/2026		01/30/2026			01/22/2026	01/30/2026							TEMPORARY NON-ROLLER TYPE LEFT HEART SUPPORT BLOOD PUMP			IMPELLA 5.5 WITH SMARTASSIST S2 SET, US			OZD			IMPELLA 5.5 WITH SMARTASSIST S2 SET, US			ABIOMED, INC.			US		2026798825		1000100		No			No		Yes	No	Health Professional			Manufacturer report
865	1220648-2026-02000	24226240	https://www.accessdata.fda.gov/scripts/cdrh/cfdocs/cfmaude/detail.cfm?mdrfoi__id=24226240&pc=OZD	01/27/2026			01/30/2026			01/27/2026	01/30/2026							TEMPORARY NON-ROLLER TYPE LEFT HEART SUPPORT BLOOD PUMP			IMPELLA CONTROLLER, PACKAGED, US			OZD						ABIOMED, INC. - 1220648			US		1338418		0042-0000-US		Device was returned to manufacturer			No		No	No	Health Professional			Manufacturer report
866	1220648-2026-02002	24226313	https://www.accessdata.fda.gov/scripts/cdrh/cfdocs/cfmaude/detail.cfm?mdrfoi__id=24226313&pc=OZD	01/22/2026	02/03/2026		01/30/2026			01/22/2026	01/30/2026							TEMPORARY NON-ROLLER TYPE LEFT HEART SUPPORT BLOOD PUMP			IMPELLA CONTROLLER, PACKAGED, US			OZD			IMPELLA CONTROLLER, PACKAGED, US			ABIOMED, INC.			US		1814730		0042-0000-US		Device was returned to manufacturer			No		No	No	Health Professional			Manufacturer report
867	1220648-2026-02003	24226366	https://www.accessdata.fda.gov/scripts/cdrh/cfdocs/cfmaude/detail.cfm?mdrfoi__id=24226366&pc=OZD	01/22/2026	01/30/2026		01/30/2026			01/22/2026	01/30/2026							TEMPORARY NON-ROLLER TYPE LEFT HEART SUPPORT BLOOD PUMP			IMPELLA 5.5 WITH SMARTASSIST S2 SET, US			OZD			IMPELLA 5.5 WITH SMARTASSIST S2 SET, US			ABIOMED, INC.			US		2026780939		1000100		No			No		Yes	No	Health Professional			Manufacturer report
868	1220648-2026-02005	24226388	https://www.accessdata.fda.gov/scripts/cdrh/cfdocs/cfmaude/detail.cfm?mdrfoi__id=24226388&pc=OZD	01/22/2026	01/30/2026		01/30/2026			01/22/2026	01/30/2026					01/30/2026		TEMPORARY NON-ROLLER TYPE LEFT HEART SUPPORT BLOOD PUMP			IMPELLA OPTICAL CONTROLLER, PACKAGED, US			OZD			IMPELLA OPTICAL CONTROLLER, PACKAGED, US			ABIOMED, INC.			US		1432077		0042-0010-US		Device was returned to manufacturer			No		No	No	Health Professional			Manufacturer report
869	1220648-2026-02007	24226455	https://www.accessdata.fda.gov/scripts/cdrh/cfdocs/cfmaude/detail.cfm?mdrfoi__id=24226455&pc=OZD	01/22/2026	02/16/2026		01/30/2026			01/22/2026	01/30/2026							TEMPORARY NON-ROLLER TYPE LEFT HEART SUPPORT BLOOD PUMP			IMPELLA 5.5 WITH SMARTASSIST S2 SET, US			OZD			IMPELLA 5.5 WITH SMARTASSIST S2 SET, US			ABIOMED, INC.			US		2026783696		1000100		No			No		Yes	No	Health Professional			Manufacturer report
870	1220648-2026-02009	24226547	https://www.accessdata.fda.gov/scripts/cdrh/cfdocs/cfmaude/detail.cfm?mdrfoi__id=24226547&pc=OZD	01/23/2026	01/30/2026		01/30/2026			01/23/2026	01/30/2026							TEMPORARY NON-ROLLER TYPE LEFT HEART SUPPORT BLOOD PUMP			IMPELLA 5.5 WITH SMARTASSIST S2 SET, US			OZD			IMPELLA 5.5 WITH SMARTASSIST S2 SET, US			ABIOMED, INC.			US		2026775944		1000100		No			No		Yes	No	Health Professional			Manufacturer report
871	1220648-2026-02011	24226562	https://www.accessdata.fda.gov/scripts/cdrh/cfdocs/cfmaude/detail.cfm?mdrfoi__id=24226562&pc=OZD	01/22/2026	01/30/2026		01/30/2026			01/23/2026	01/30/2026							TEMPORARY NON-ROLLER TYPE LEFT HEART SUPPORT BLOOD PUMP			IMPELLA 5.5 WITH SMARTASSIST S2 SET, US			OZD			IMPELLA 5.5 WITH SMARTASSIST S2 SET, US			ABIOMED, INC.			US		2026795532		1000100		No			No		Yes	No	Health Professional			Manufacturer report
872	1220648-2026-02010	24226565	https://www.accessdata.fda.gov/scripts/cdrh/cfdocs/cfmaude/detail.cfm?mdrfoi__id=24226565&pc=OZD	12/01/2025			01/30/2026			12/01/2025	01/30/2026							TEMPORARY NON-ROLLER TYPE LEFT HEART SUPPORT BLOOD PUMP			AUTOMATED IMPELLA CONTROLLER			OZD			AUTOMATED IMPELLA CONTROLLER			ABIOMED, INC. - 1220648			US		1084348		0042-0000-US		No			No		No	No	Health Professional			Manufacturer report
873	1220648-2026-02012	24226573	https://www.accessdata.fda.gov/scripts/cdrh/cfdocs/cfmaude/detail.cfm?mdrfoi__id=24226573&pc=OZD	10/18/2025			01/30/2026			10/18/2025	01/30/2026					01/30/2026		TEMPORARY NON-ROLLER TYPE LEFT HEART SUPPORT BLOOD PUMP			IMPELLA CP			OZD						ABIOMED, INC. - 1220648			US		2026753466		1000851		No			No		Yes	No	Health Professional			Manufacturer report
874	1220648-2026-02015	24226715	https://www.accessdata.fda.gov/scripts/cdrh/cfdocs/cfmaude/detail.cfm?mdrfoi__id=24226715&pc=OZD	10/11/2025			01/30/2026			10/11/2025	01/30/2026							TEMPORARY NON-ROLLER TYPE LEFT HEART SUPPORT BLOOD PUMP			IMPELLA 5.5 WITH SMARTASSIST S2 SET, US			OZD						ABIOMED, INC. - 1220648			US		2026653493		1000100		No			No		Yes	No	Health Professional			Manufacturer report
875	1220648-2026-02016	24227593	https://www.accessdata.fda.gov/scripts/cdrh/cfdocs/cfmaude/detail.cfm?mdrfoi__id=24227593&pc=OZD	12/10/2025			01/30/2026			12/18/2025	01/30/2026					01/30/2026		TEMPORARY NON-ROLLER TYPE LEFT HEART SUPPORT BLOOD PUMP			IMPELLA 5.5			OZD			IMPELLA 5.5			ABIOMED, INC. - 1220648			US		2026786130		1000459		No			No		Yes	No	Health Professional			Manufacturer report
876	1220648-2026-01809	24206630	https://www.accessdata.fda.gov/scripts/cdrh/cfdocs/cfmaude/detail.cfm?mdrfoi__id=24206630&pc=OZD	11/05/2025			01/29/2026			11/05/2025	01/29/2026							TEMPORARY NON-ROLLER TYPE LEFT HEART SUPPORT BLOOD PUMP			IMPELLA 5.5 WITH SMARTASSIST S2 SET, US			OZD			IMPELLA 5.5 WITH SMARTASSIST S2 SET, US			ABIOMED, INC. - 1220648			US		2026713399		000000000001000100		No			No		Yes	No	Health Professional			Manufacturer report
877	1220648-2026-01781	24206632	https://www.accessdata.fda.gov/scripts/cdrh/cfdocs/cfmaude/detail.cfm?mdrfoi__id=24206632&pc=OZD	10/19/2025	01/28/2026		01/29/2026			10/19/2025	01/29/2026					01/29/2026		TEMPORARY NON-ROLLER TYPE LEFT HEART SUPPORT BLOOD PUMP			IMPELLA 5.5 WITH SMARTASSIST S2 SET, US			OZD			IMPELLA 5.5 WITH SMARTASSIST S2 SET, US			ABIOMED, INC. - 1220648			US		2026636270		000000000001000100		No			No		Yes	No	Health Professional			Manufacturer report
878	1220648-2026-01813	24206642	https://www.accessdata.fda.gov/scripts/cdrh/cfdocs/cfmaude/detail.cfm?mdrfoi__id=24206642&pc=OZD	11/05/2025			01/29/2026			11/06/2025	01/29/2026							TEMPORARY NON-ROLLER TYPE LEFT HEART SUPPORT BLOOD PUMP			IMPELLA 5.5 WITH SMARTASSIST S2 SET, US			OZD			IMPELLA 5.5 WITH SMARTASSIST S2 SET, US			ABIOMED, INC. - 1220648			US		2026744185		000000000001000100		No			No		Yes	No	Health Professional			Manufacturer report
879	1220648-2026-01816	24208326	https://www.accessdata.fda.gov/scripts/cdrh/cfdocs/cfmaude/detail.cfm?mdrfoi__id=24208326&pc=OZD	01/20/2026			01/29/2026			01/21/2026	01/29/2026							TEMPORARY NON-ROLLER TYPE LEFT HEART SUPPORT BLOOD PUMP			IMPELLA 5.5 WITH SMARTASSIST S2 SET, US			OZD						ABIOMED, INC. - 1220648			US		2026729894		000000000001000100		No			No		Yes	No	Health Professional			Manufacturer report
880	1220648-2026-01603	24208372	https://www.accessdata.fda.gov/scripts/cdrh/cfdocs/cfmaude/detail.cfm?mdrfoi__id=24208372&pc=OZD	10/28/2025			01/29/2026			10/28/2025	01/29/2026							TEMPORARY NON-ROLLER TYPE LEFT HEART SUPPORT BLOOD PUMP			IMPELLA CONTROLLER, PACKAGED, US			OZD			IMPELLA CONTROLLER, PACKAGED, US			ABIOMED, INC. - 1220648			US		1080535		0042-0000-US		Device was returned to manufacturer			Yes		No	No	Health Professional			Manufacturer report
881	1220648-2026-01818	24208413	https://www.accessdata.fda.gov/scripts/cdrh/cfdocs/cfmaude/detail.cfm?mdrfoi__id=24208413&pc=OZD	01/09/2026			01/29/2026			01/09/2026	01/29/2026					01/29/2026		TEMPORARY NON-ROLLER TYPE LEFT HEART SUPPORT BLOOD PUMP			IMPELLA CPSA C9+ SET, OUS			OZD						ABIOMED, INC. - 1220648			US		2026785665		000000000001000851		No			No		Yes	No	Health Professional			Manufacturer report
882	1220648-2026-01819	24208464	https://www.accessdata.fda.gov/scripts/cdrh/cfdocs/cfmaude/detail.cfm?mdrfoi__id=24208464&pc=OZD	01/13/2026			01/29/2026			01/15/2026	01/29/2026					01/29/2026		TEMPORARY NON-ROLLER TYPE LEFT HEART SUPPORT BLOOD PUMP			IMPELLA CPSA C9+ SET, OUS			OZD						ABIOMED, INC. - 1220648			US		2026782243		000000000001000851		No			No		Yes	No	Health Professional			Manufacturer report
883	1220648-2026-01820	24208492	https://www.accessdata.fda.gov/scripts/cdrh/cfdocs/cfmaude/detail.cfm?mdrfoi__id=24208492&pc=OZD	01/14/2026			01/29/2026			01/15/2026	01/29/2026					01/29/2026		TEMPORARY NON-ROLLER TYPE LEFT HEART SUPPORT BLOOD PUMP			IMPELLA CONTROLLER, PACKAGED, EU			OZD						ABIOMED, INC. - 1220648			US				0042-0000-EU		No			No		No	No	Health Professional			Manufacturer report
884	1220648-2026-01834	24208915	https://www.accessdata.fda.gov/scripts/cdrh/cfdocs/cfmaude/detail.cfm?mdrfoi__id=24208915&pc=OZD	01/19/2026			01/29/2026			01/20/2026	01/29/2026					01/29/2026		TEMPORARY NON-ROLLER TYPE LEFT HEART SUPPORT BLOOD PUMP			IMPELLA 5.5 WITH SMARTASSIST S2 SET, US			OZD						ABIOMED, INC. - 1220648			US		2026775826		000000000001000100		No			No		Yes	No	Health Professional			Manufacturer report
885	1220648-2026-01836	24208932	https://www.accessdata.fda.gov/scripts/cdrh/cfdocs/cfmaude/detail.cfm?mdrfoi__id=24208932&pc=OZD	01/20/2026	02/02/2026		01/29/2026			01/20/2026	01/29/2026					01/29/2026		TEMPORARY NON-ROLLER TYPE LEFT HEART SUPPORT BLOOD PUMP			IMPELLA 5.5 WITH SMARTASSIST S2 SET, US			OZD						ABIOMED, INC. - 1220648			US		2026741805		000000000001000100		No			No		Yes	No	Health Professional			Manufacturer report
886	1220648-2026-01837	24208955	https://www.accessdata.fda.gov/scripts/cdrh/cfdocs/cfmaude/detail.cfm?mdrfoi__id=24208955&pc=OZD	01/20/2026			01/29/2026			01/20/2026	01/29/2026					01/29/2026		TEMPORARY NON-ROLLER TYPE LEFT HEART SUPPORT BLOOD PUMP			IMPELLA 5.5 WITH SMARTASSIST S2 SET, US			OZD						ABIOMED, INC. - 1220648			US		2026782019		000000000001000100		Device was returned to manufacturer			No		Yes	No	Health Professional			Manufacturer report
887	1220648-2026-01840	24208996	https://www.accessdata.fda.gov/scripts/cdrh/cfdocs/cfmaude/detail.cfm?mdrfoi__id=24208996&pc=OZD	01/21/2026	02/02/2026		01/29/2026			01/21/2026	01/29/2026							TEMPORARY NON-ROLLER TYPE LEFT HEART SUPPORT BLOOD PUMP			IMPELLA CONTROLLER, PACKAGED, US			OZD						ABIOMED, INC. - 1220648			US		1218086		0042-0000-US		Device was returned to manufacturer			No		No	No	Health Professional			Manufacturer report
888	1220648-2026-01841	24209177	https://www.accessdata.fda.gov/scripts/cdrh/cfdocs/cfmaude/detail.cfm?mdrfoi__id=24209177&pc=OZD	11/18/2025			01/29/2026			11/18/2025	01/29/2026					01/29/2026		TEMPORARY NON-ROLLER TYPE LEFT HEART SUPPORT BLOOD PUMP			IMPELLA CP			OZD			IMPELLA CP			ABIOMED, INC. - 1220648			US		2026766566		1000080		No			No		Yes	Y	Health Professional			Manufacturer report
889	1220648-2026-01843	24209282	https://www.accessdata.fda.gov/scripts/cdrh/cfdocs/cfmaude/detail.cfm?mdrfoi__id=24209282&pc=OZD	01/17/2026			01/29/2026			01/17/2026	01/29/2026							TEMPORARY NON-ROLLER TYPE LEFT HEART SUPPORT BLOOD PUMP			IMPELLA 5.5 WITH SMARTASSIST S2 SET, US			OZD						ABIOMED, INC. - 1220648			US		2026743354		1000100		No			No		Yes	No	Health Professional			Manufacturer report
890	1220648-2026-01844	24209377	https://www.accessdata.fda.gov/scripts/cdrh/cfdocs/cfmaude/detail.cfm?mdrfoi__id=24209377&pc=OZD	11/18/2025			01/29/2026			11/18/2025	01/29/2026					01/29/2026		TEMPORARY NON-ROLLER TYPE LEFT HEART SUPPORT BLOOD PUMP			IMPELLA CP			OZD			IMPELLA CP			ABIOMED, INC. - 1220648			US		2026769856		1000080		No			No		Yes	No	Health Professional			Manufacturer report
891	1220648-2026-01845	24209411	https://www.accessdata.fda.gov/scripts/cdrh/cfdocs/cfmaude/detail.cfm?mdrfoi__id=24209411&pc=OZD	01/16/2026			01/29/2026			01/16/2026	01/29/2026							TEMPORARY NON-ROLLER TYPE LEFT HEART SUPPORT BLOOD PUMP			IMPELLA 5.5 WITH SMARTASSIST S2 SET, US			OZD						ABIOMED, INC. - 1220648			US		2026737527		000000000001000100		Device was returned to manufacturer			No		Yes	No	Health Professional			Manufacturer report
892	1220648-2026-01848	24209518	https://www.accessdata.fda.gov/scripts/cdrh/cfdocs/cfmaude/detail.cfm?mdrfoi__id=24209518&pc=OZD	01/19/2026			01/29/2026			01/19/2026	01/29/2026							TEMPORARY NON-ROLLER TYPE LEFT HEART SUPPORT BLOOD PUMP			IMPELLA 5.5 WITH SMARTASSIST S2 SET, US			OZD						ABIOMED, INC. - 1220648			US		2026797261		1000100		No			No		Yes	No	Health Professional			Manufacturer report
893	1220648-2026-01855	24210729	https://www.accessdata.fda.gov/scripts/cdrh/cfdocs/cfmaude/detail.cfm?mdrfoi__id=24210729&pc=PYX	10/20/2025			01/29/2026			10/20/2025	01/29/2026					01/29/2026		TEMPORARY NON-ROLLER TYPE RIGHT HEART SUPPORT BLOOD PUMP			OPTICAL, AIC, IMPELLA CONNECT, PKGD, US			PYX						ABIOMED, INC. - 1220648			US		1668177		0042-0040-US		No			No		No	No	Health Professional			Manufacturer report
894	1220648-2026-01856	24210765	https://www.accessdata.fda.gov/scripts/cdrh/cfdocs/cfmaude/detail.cfm?mdrfoi__id=24210765&pc=OZD	01/23/2026			01/29/2026			01/23/2026	01/29/2026					01/29/2026		TEMPORARY NON-ROLLER TYPE LEFT HEART SUPPORT BLOOD PUMP			IMPELLA 5.5 WITH SMARTASSIST S2 SET, US			OZD						ABIOMED, INC. - 1220648			US		2026773801		1000100		No			No		Yes	No	Health Professional			Manufacturer report
895	1220648-2026-01857	24210817	https://www.accessdata.fda.gov/scripts/cdrh/cfdocs/cfmaude/detail.cfm?mdrfoi__id=24210817&pc=OZD	11/19/2025			01/29/2026			11/19/2025	01/29/2026							TEMPORARY NON-ROLLER TYPE LEFT HEART SUPPORT BLOOD PUMP			IMPELLA CP			OZD			IMPELLA CP			ABIOMED, INC. - 1220648			US		2026759575		1000080		No			No		Yes	No	Health Professional			Manufacturer report
896	1220648-2026-01858	24210861	https://www.accessdata.fda.gov/scripts/cdrh/cfdocs/cfmaude/detail.cfm?mdrfoi__id=24210861&pc=OZD	10/21/2025			01/29/2026			10/21/2025	01/29/2026					01/29/2026		TEMPORARY NON-ROLLER TYPE LEFT HEART SUPPORT BLOOD PUMP			IMPELLA CONTROLLER, PACKAGED, US			OZD						ABIOMED, INC. - 1220648			US		1389732		0042-0000-US		Device was returned to manufacturer			No		No	No	Health Professional			Manufacturer report
897	1220648-2026-01859	24210967	https://www.accessdata.fda.gov/scripts/cdrh/cfdocs/cfmaude/detail.cfm?mdrfoi__id=24210967&pc=PYX	10/21/2025			01/29/2026			10/21/2025	01/29/2026							TEMPORARY NON-ROLLER TYPE RIGHT HEART SUPPORT BLOOD PUMP			OPTICAL, AIC, IMPELLA CONNECT, PKGD, US			PYX						ABIOMED, INC. - 1220648			US		1462131		0042-0040-US		Device was returned to manufacturer			Yes		No	No	Health Professional			Manufacturer report
898	1220648-2026-01861	24211249	https://www.accessdata.fda.gov/scripts/cdrh/cfdocs/cfmaude/detail.cfm?mdrfoi__id=24211249&pc=OZD	01/21/2026	02/24/2026		01/29/2026			01/22/2026	01/29/2026					01/29/2026		TEMPORARY NON-ROLLER TYPE LEFT HEART SUPPORT BLOOD PUMP			OPTICAL, AIC, IMPELLA CONNECT, PKGD, US			OZD						ABIOMED, INC. - 1220648			US		1431034		0042-0040-US		Device was returned to manufacturer			No		No	No	Health Professional			Manufacturer report
899	1220648-2026-01862	24211264	https://www.accessdata.fda.gov/scripts/cdrh/cfdocs/cfmaude/detail.cfm?mdrfoi__id=24211264&pc=OZD	01/25/2026			01/29/2026			01/25/2026	01/29/2026							TEMPORARY NON-ROLLER TYPE LEFT HEART SUPPORT BLOOD PUMP			IMPELLA 5.5 WITH SMARTASSIST S2 SET, US			OZD						ABIOMED, INC. - 1220648			US		2026795547		1000100		No			No		Yes	No	Health Professional			Manufacturer report
900	1220648-2026-01863	24211469	https://www.accessdata.fda.gov/scripts/cdrh/cfdocs/cfmaude/detail.cfm?mdrfoi__id=24211469&pc=OZD	11/08/2025			01/29/2026			11/07/2025	01/29/2026							TEMPORARY NON-ROLLER TYPE LEFT HEART SUPPORT BLOOD PUMP			IMPELLA 5.5 WITH SMARTASSIST S2 SET, US			OZD			IMPELLA 5.5 WITH SMARTASSIST S2 SET, US			ABIOMED, INC. - 1220648			US		2026728911		1000100		No			No		Yes	No	Health Professional			Manufacturer report
901	1220648-2026-01865	24211644	https://www.accessdata.fda.gov/scripts/cdrh/cfdocs/cfmaude/detail.cfm?mdrfoi__id=24211644&pc=OZD	11/12/2025			01/29/2026			11/12/2025	01/29/2026							TEMPORARY NON-ROLLER TYPE LEFT HEART SUPPORT BLOOD PUMP			IMPELLA 5.5 WITH SMARTASSIST S2 SET, US			OZD			IMPELLA 5.5 WITH SMARTASSIST S2 SET, US			ABIOMED, INC. - 1220648			US		2026727096		1000100		No			No		Yes	No	Health Professional			Manufacturer report
902	1220648-2026-01866	24211657	https://www.accessdata.fda.gov/scripts/cdrh/cfdocs/cfmaude/detail.cfm?mdrfoi__id=24211657&pc=OZD	01/25/2026			01/29/2026			01/25/2026	01/29/2026							TEMPORARY NON-ROLLER TYPE LEFT HEART SUPPORT BLOOD PUMP			OPTICAL, AIC, IMPELLA CONNECT, PKGD, US			OZD						ABIOMED, INC. - 1220648			US		1883624		0042-0040-US		No			No		No	No	Health Professional			Manufacturer report
903	1220648-2026-01867	24211793	https://www.accessdata.fda.gov/scripts/cdrh/cfdocs/cfmaude/detail.cfm?mdrfoi__id=24211793&pc=OZD	01/25/2026	02/03/2026		01/29/2026			01/25/2026	01/29/2026							TEMPORARY NON-ROLLER TYPE LEFT HEART SUPPORT BLOOD PUMP			IMPELLA 5.5 WITH SMARTASSIST S2 SET, US			OZD						ABIOMED, INC. - 1220648			US		2026707304		1000100		No			No		Yes	No	Health Professional			Manufacturer report
904	1220648-2026-01869	24211973	https://www.accessdata.fda.gov/scripts/cdrh/cfdocs/cfmaude/detail.cfm?mdrfoi__id=24211973&pc=OZD	01/24/2026			01/29/2026			01/25/2026	01/29/2026					01/29/2026		TEMPORARY NON-ROLLER TYPE LEFT HEART SUPPORT BLOOD PUMP			IMPELLA 5.5 SMARTASSIST S2 SET, JP			OZD						ABIOMED, INC. - 1220648			US		2026805160		1000459		No			No		Yes	No	Health Professional			Manufacturer report
905	1220648-2026-01846	24215140	https://www.accessdata.fda.gov/scripts/cdrh/cfdocs/cfmaude/detail.cfm?mdrfoi__id=24215140&pc=PYX	11/04/2025			01/29/2026			11/04/2025	01/29/2026					01/29/2026		TEMPORARY NON-ROLLER TYPE RIGHT HEART SUPPORT BLOOD PUMP			OPTICAL, AIC, IMPELLA CONNECT, PKGD, US			PYX			OPTICAL, AIC, IMPELLA CONNECT, PKGD, US			ABIOMED, INC. - 1220648			US		1664272		0042-0040-US		Device was returned to manufacturer			No		No	No	Health Professional			Manufacturer report
906	1220648-2026-01875	24215147	https://www.accessdata.fda.gov/scripts/cdrh/cfdocs/cfmaude/detail.cfm?mdrfoi__id=24215147&pc=OZD	11/19/2025			01/29/2026			11/19/2025	01/29/2026					01/29/2026		TEMPORARY NON-ROLLER TYPE LEFT HEART SUPPORT BLOOD PUMP			IMPELLA CP			OZD			IMPELLA CP			ABIOMED, INC. - 1220648			US		2026774575		1000080		No			No			No	Health Professional			Manufacturer report
907	1220648-2026-01879	24217754	https://www.accessdata.fda.gov/scripts/cdrh/cfdocs/cfmaude/detail.cfm?mdrfoi__id=24217754&pc=OZD	01/26/2026	01/29/2026		01/29/2026			01/26/2026	01/29/2026							TEMPORARY NON-ROLLER TYPE LEFT HEART SUPPORT BLOOD PUMP			IMPELLA CPSA C9+ SET, OUS			OZD						ABIOMED, INC.			US		2026771042		1000851		No			No		Yes	No	Health Professional			Manufacturer report
908	1220648-2026-01880	24217811	https://www.accessdata.fda.gov/scripts/cdrh/cfdocs/cfmaude/detail.cfm?mdrfoi__id=24217811&pc=OZD	01/26/2026	01/29/2026		01/29/2026			01/26/2026	01/29/2026							TEMPORARY NON-ROLLER TYPE LEFT HEART SUPPORT BLOOD PUMP			IMPELLA 5.5			OZD			IMPELLA 5.5			ABIOMED, INC.			US		2026783731		1000100		Device was returned to manufacturer			No		Yes	No	Health Professional			Manufacturer report
909	1220648-2026-01881	24217889	https://www.accessdata.fda.gov/scripts/cdrh/cfdocs/cfmaude/detail.cfm?mdrfoi__id=24217889&pc=OZD	11/01/2025	01/29/2026		01/29/2026			01/28/2026	01/29/2026					01/29/2026		TEMPORARY NON-ROLLER TYPE LEFT HEART SUPPORT BLOOD PUMP			IMPELLA CONTROLLER, PACKAGED, EU			OZD						ABIOMED, INC. - 1220648			US		1093346		0042-0000-EU		Device was returned to manufacturer			No		Yes	No	Health Professional			Manufacturer report
910	1220648-2026-01886	24218158	https://www.accessdata.fda.gov/scripts/cdrh/cfdocs/cfmaude/detail.cfm?mdrfoi__id=24218158&pc=OZD	01/27/2026			01/29/2026			01/01/2026	01/29/2026							TEMPORARY NON-ROLLER TYPE LEFT HEART SUPPORT BLOOD PUMP			IMPELLA 5.5			OZD			IMPELLA 5.5			ABIOMED, INC. - 1220648			US		2026805574		1000100		No			No		Yes	No	Health Professional			Manufacturer report
911	1220648-2026-01890	24218286	https://www.accessdata.fda.gov/scripts/cdrh/cfdocs/cfmaude/detail.cfm?mdrfoi__id=24218286&pc=OZD	11/19/2025			01/29/2026			11/19/2025	01/29/2026					01/29/2026		TEMPORARY NON-ROLLER TYPE LEFT HEART SUPPORT BLOOD PUMP			IMPELLA CP			OZD			IMPELLA CP			ABIOMED, INC. - 1220648			US		2026770789		1000080		No			No		Yes	No	Health Professional			Manufacturer report
912	1220648-2026-01891	24218366	https://www.accessdata.fda.gov/scripts/cdrh/cfdocs/cfmaude/detail.cfm?mdrfoi__id=24218366&pc=OZD	01/22/2026			01/29/2026			01/26/2026	01/29/2026					01/29/2026		TEMPORARY NON-ROLLER TYPE LEFT HEART SUPPORT BLOOD PUMP			IMPELLA CONTROLLER, PACKAGED, EU			OZD						ABIOMED, INC. - 1220648			US		1174888		0042-0000-EU		Device was returned to manufacturer			No		No	No	Health Professional			Manufacturer report
913	1220648-2026-01892	24218370	https://www.accessdata.fda.gov/scripts/cdrh/cfdocs/cfmaude/detail.cfm?mdrfoi__id=24218370&pc=OZD	11/19/2025			01/29/2026			11/19/2025	01/29/2026							TEMPORARY NON-ROLLER TYPE LEFT HEART SUPPORT BLOOD PUMP			IMPELLA CP			OZD			IMPELLA CP			ABIOMED, INC. - 1220648			US		2026774556		1000080		No			No		Yes	No	Health Professional			Manufacturer report
914	1220648-2026-01893	24218389	https://www.accessdata.fda.gov/scripts/cdrh/cfdocs/cfmaude/detail.cfm?mdrfoi__id=24218389&pc=OZD	01/26/2026			01/29/2026			01/26/2026	01/29/2026							TEMPORARY NON-ROLLER TYPE LEFT HEART SUPPORT BLOOD PUMP			OPTICAL AIC W/IMPELLA CONNECT,PACK'D, EU			OZD						ABIOMED, INC. - 1220648			US		1745371		0042-0040-EU		No			No		No	No	Health Professional			Manufacturer report
915	1220648-2026-01894	24218494	https://www.accessdata.fda.gov/scripts/cdrh/cfdocs/cfmaude/detail.cfm?mdrfoi__id=24218494&pc=OZD	07/23/2025			01/29/2026			01/13/2026	01/29/2026							TEMPORARY NON-ROLLER TYPE LEFT HEART SUPPORT BLOOD PUMP			IMPELLA 5.5 WITH SMARTASSIST S2 SET, US			OZD						ABIOMED, INC. - 1220648			US		2025573283		000000000001000100		No			No		Yes	No	Health Professional			Manufacturer report
916	1220648-2026-01897	24218518	https://www.accessdata.fda.gov/scripts/cdrh/cfdocs/cfmaude/detail.cfm?mdrfoi__id=24218518&pc=OZD	11/19/2025			01/29/2026			11/19/2025	01/29/2026			12/31/2025				TEMPORARY NON-ROLLER TYPE LEFT HEART SUPPORT BLOOD PUMP			IMPELLA CP			OZD			IMPELLA CP			ABIOMED, INC. - 1220648			US		2025449400		1000080		No			No		Yes	No	Health Professional			Manufacturer report
917	1220648-2026-01904	24218585	https://www.accessdata.fda.gov/scripts/cdrh/cfdocs/cfmaude/detail.cfm?mdrfoi__id=24218585&pc=OZD	01/16/2026	01/29/2026		01/29/2026			01/16/2026	01/29/2026					01/29/2026		TEMPORARY NON-ROLLER TYPE LEFT HEART SUPPORT BLOOD PUMP			IMPELLA 5.5 WITH SMARTASSIST S2 SET, US			OZD			IMPELLA 5.5 WITH SMARTASSIST S2 SET, US			ABIOMED, INC.			US		2026798757		1000100		No			No		Yes	No	Health Professional			Manufacturer report
918	1220648-2026-01906	24218612	https://www.accessdata.fda.gov/scripts/cdrh/cfdocs/cfmaude/detail.cfm?mdrfoi__id=24218612&pc=PYX	01/20/2026	01/29/2026		01/29/2026			01/20/2026	01/29/2026					01/29/2026		TEMPORARY NON-ROLLER TYPE RIGHT HEART SUPPORT BLOOD PUMP			OPTICAL, AIC, IMPELLA CONNECT, PKGD, US			PYX			OPTICAL, AIC, IMPELLA CONNECT, PKGD, US			ABIOMED, INC.			US		1541296		0042-0040-US		No			No		No	No	Health Professional			Manufacturer report
919	1220648-2026-01908	24218627	https://www.accessdata.fda.gov/scripts/cdrh/cfdocs/cfmaude/detail.cfm?mdrfoi__id=24218627&pc=OZD	01/16/2026	02/03/2026		01/29/2026			01/16/2026	01/29/2026							TEMPORARY NON-ROLLER TYPE LEFT HEART SUPPORT BLOOD PUMP			IMPELLA 5.5 WITH SMARTASSIST S2 SET, US			OZD			IMPELLA 5.5 WITH SMARTASSIST S2 SET, US			ABIOMED, INC.			US		2026681954		1000100		No			No		Yes	No	Health Professional			Manufacturer report
920	1220648-2026-01910	24218688	https://www.accessdata.fda.gov/scripts/cdrh/cfdocs/cfmaude/detail.cfm?mdrfoi__id=24218688&pc=OZD	01/16/2026	01/29/2026		01/29/2026			01/16/2026	01/29/2026							TEMPORARY NON-ROLLER TYPE LEFT HEART SUPPORT BLOOD PUMP			IMPELLA 5.5 WITH SMARTASSIST S2 SET, US			OZD						ABIOMED, INC.			US		2026801056		1000100		No			No		Yes	No	Health Professional			Manufacturer report
921	1220648-2026-01911	24218705	https://www.accessdata.fda.gov/scripts/cdrh/cfdocs/cfmaude/detail.cfm?mdrfoi__id=24218705&pc=OZD	01/16/2026	01/29/2026		01/29/2026			01/16/2026	01/29/2026							TEMPORARY NON-ROLLER TYPE LEFT HEART SUPPORT BLOOD PUMP			IMPELLA 5.5 WITH SMARTASSIST S2 SET, US			OZD			IMPELLA 5.5 WITH SMARTASSIST S2 SET, US			ABIOMED, INC.			US		2026655826		1000100		No			No			No	Health Professional			Manufacturer report
922	1220648-2026-01914	24218755	https://www.accessdata.fda.gov/scripts/cdrh/cfdocs/cfmaude/detail.cfm?mdrfoi__id=24218755&pc=OZD	01/22/2026	01/29/2026		01/29/2026			01/22/2026	01/29/2026					01/29/2026		TEMPORARY NON-ROLLER TYPE LEFT HEART SUPPORT BLOOD PUMP			IMPELLA 5.5 WITH SMARTASSIST S2 SET, US			OZD			IMPELLA 5.5 WITH SMARTASSIST S2 SET, US			ABIOMED, INC.			US		2026745717		1000100		Device was returned to manufacturer			No		Yes	No	Health Professional			Manufacturer report
923	1220648-2026-01915	24218769	https://www.accessdata.fda.gov/scripts/cdrh/cfdocs/cfmaude/detail.cfm?mdrfoi__id=24218769&pc=OZD	01/19/2026	01/29/2026		01/29/2026			01/22/2026	01/29/2026							TEMPORARY NON-ROLLER TYPE LEFT HEART SUPPORT BLOOD PUMP			IMPELLA 5.5 WITH SMARTASSIST S2 SET, US			OZD			IMPELLA 5.5 WITH SMARTASSIST S2 SET, US			ABIOMED, INC.			US		2026669824		1000100		No			No		Yes	No	Health Professional			Manufacturer report
924	1220648-2026-01917	24218849	https://www.accessdata.fda.gov/scripts/cdrh/cfdocs/cfmaude/detail.cfm?mdrfoi__id=24218849&pc=OZD	10/25/2025			01/29/2026			10/25/2025	01/29/2026					01/29/2026		TEMPORARY NON-ROLLER TYPE LEFT HEART SUPPORT BLOOD PUMP			IMPELLA 5.5 WITH SMARTASSIST S2 SET, US			OZD			IMPELLA 5.5 WITH SMARTASSIST S2 SET, US			ABIOMED, INC. - 1220648			US		2026736503		000000000001000100		No			No		Yes	No	Health Professional			Manufacturer report
[truncated: 37,513 more rows]
[truncated: 88 more columns]
